# Supplementary material for: Association of Maternal Diet during Pregnancy and Metabolite Profile in Cord Blood
Source: MDPI journal article supplement (doi:10.3390/biom12101333), 2022-09-21
Supplement: s1 [file s1]

**Table S1.** List of foods with factor loadings of  $\geq |0.3|$  used to label dietary patterns

| Factor | Dietary Pattern Label                | Foods                                                                                                          |               |
|--------|--------------------------------------|----------------------------------------------------------------------------------------------------------------|---------------|
|        |                                      | Higher intakes                                                                                                 | Lower intakes |
| 1      | Vegetables                           | Boiled potatoes<br>Raw carrots<br>Carrots<br>Spinach, Swiss chard<br>Cooked vegetables<br>Celery<br>Vegetables |               |
| 2      | Fruits                               | Juices<br>Citrus fruits<br>Apple<br>Kiwi, pineapple, mango<br>Banana                                           |               |
| 3      | Summer vegetables                    | Raw tomatoes<br>Raw sweet pepper<br>Cooked sweet pepper                                                        |               |
| 4      | Salad & dressings                    | Vegetable oil (not olive)<br>Lettuce<br>Mayonnaise, salad dressing                                             |               |
| 5      | Cereal, seeds, nuts, yoghurt, cheese | Yoghurt<br>Cheese<br>Oily fruits and seeds<br>Nuts<br>Cereals                                                  |               |
| 6      | Butter vs. margarine                 | Butter                                                                                                         | Margarine     |
| 7      | Meat & potato                        | Liver sausage, pate<br>Pork<br>Boiled potatoes                                                                 |               |
| 8      | Sweets                               | Cake<br>Fruit cake<br>Sweet dairy foods                                                                        |               |
| 9      | Fish & shellfish                     | Fish<br>Seafood, shellfish<br>Canned fish, smoked fish                                                         |               |
| 10     | Seasonal                             | Citrus fruits<br>Gingerbread (Lebkuchen)                                                                       | Strawberry    |
