# Supplementary material for: Association of Maternal Diet during Pregnancy and Metabolite Profile in Cord Blood
Source: MDPI journal article supplement (doi:10.3390/biom12101333), 2022-09-21
Supplement: s1 [file s1]

**Table S2: Association between Dietary patterns and Covariates**

| Covariates                                    | Vegetables     | Fruits        | Summer Vegetables | Salad & Dressings | Cereal, Seeds, Nuts, Yogurt, Cheese | Butter vs Magarine | Meat & Potato     | Sweets | Fish & Shellfish | Seasonal      |
|-----------------------------------------------|----------------|---------------|-------------------|-------------------|-------------------------------------|--------------------|-------------------|--------|------------------|---------------|
| City                                          |                |               |                   |                   |                                     |                    |                   |        |                  |               |
| Munich, mean                                  | <b>-0.14**</b> | <b>-0.01*</b> | <b>0.03*</b>      | 0.29              | 0.09                                | <b>0.33**</b>      | <b>-0.22**</b>    | -0.04  | 0.03             | <b>0.09*</b>  |
| Bad Honnef, mean                              | <b>0.12**</b>  | <b>-0.20*</b> | <b>-0.15*</b>     | 0.42              | -0.03                               | <b>-0.10**</b>     | <b>0.28**</b>     | -0.07  | -0.09            | <b>-0.11*</b> |
| Sex                                           |                |               |                   |                   |                                     |                    |                   |        |                  |               |
| male, mean                                    | -0.08          | -0.05         | 0.01              | 0.34              | 0.08                                | 0.25               | -0.09             | -0.04  | 0.01             | 0.01          |
| female, mean                                  | -0.07          | -0.06         | -0.03             | 0.31              | 0.04                                | 0.21               | -0.11             | -0.05  | -0.01            | 0.09          |
| Smoking, during 3 <sup>rd</sup> trimester     |                |               |                   |                   |                                     |                    |                   |        |                  |               |
| no, mean                                      | -0.07          | <b>-0.02*</b> | -0.01             | 0.31              | <b>0.13**</b>                       | <b>0.27**</b>      | <b>-0.12*</b>     | -0.05  | <0.01            | 0.05          |
| yes, mean                                     | -0.20          | <b>-0.28*</b> | -0.03             | 0.49              | <b>-0.32**</b>                      | <b>-0.09**</b>     | <b>0.06*</b>      | -0.02  | <0.01            | 0.03          |
| Maternal education                            |                |               |                   |                   |                                     |                    |                   |        |                  |               |
| low, mean                                     | -0.04          | <b>-0.21*</b> | -0.07             | 0.40              | <b>-0.38**</b>                      | <b>-0.10**</b>     | <b>&lt;0.01**</b> | -0.11  | -0.01            | -0.10         |
| medium, mean                                  | -0.06          | <b>-0.12*</b> | -0.03             | 0.34              | <b>-0.09**</b>                      | <b>0.11**</b>      | <b>0.04**</b>     | 0.03   | -0.03            | 0.01          |
| high, mean                                    | -0.09          | <b>0.01*</b>  | 0.01              | 0.30              | <b>0.22**</b>                       | <b>0.35**</b>      | <b>-0.20**</b>    | -0.08  | 0.02             | 0.10          |
| Maternal age, correlation                     | 0.05           | 0.04          | 0.06              | -0.03             | <b>0.14**</b>                       | <b>0.16**</b>      | -0.02             | -0.06  | <b>0.12*</b>     | -0.01         |
| Maternal pre-pregnancy BMI, correlation       | <b>-0.08*</b>  | <b>-0.10*</b> | <0.01             | -0.05             | <b>-0.13**</b>                      | <b>-0.16**</b>     | <b>0.14**</b>     | 0.04   | 0.04             | 0.01          |
| Maternal gestational weight gain, correlation | -0.01          | 0.02          | <0.01             | 0.03              | -0.05                               | -0.05              | <b>-0.12*</b>     | 0.02   | <0.01            | <0.01         |
| Birth weight, correlation                     | 0.03           | -0.03         | -0.05             | -0.04             | 0.03                                | <0.01              | -0.02             | -0.02  | -0.04            | -0.01         |
| Gestational age, correlation                  | -0.04          | 0.01          | -0.07             | -0.01             | 0.03                                | -0.05              | <0.01             | -0.02  | -0.01            | 0.03          |

\* p<0.05 \*\*p<0.001, p values are obtained from Pearson correlation for numeric variables, t-Test / ANOVA for categorical variables
