# Supplementary material for: Association of Maternal Diet during Pregnancy and Metabolite Profile in Cord Blood
Source: Biomolecules. 2022 Sep 21;12(10):1333. doi: 10.3390/biom12101333 (PMC9599655; doi:10.3390/biom12101333)
Supplement: Supplementary file 1 [file biomolecules-12-01333-s001.zip › Supplementary_Table_S3.xlsx]

## Sheet: Factor1
	Crude model					Main model					Main model +					Main model ++
	Not Adjusted					Adjusted for city, sex, gestational age, smoking, materanl education, maternal age					Main model, further adjusted for maternal BMI, and maternal gestational weight gain					Main model +, further adjusted for birth weight
Metabolite	n	beta	se	p	p_fdr	n	beta	se	p	p_fdr	n	beta	se	p	p_fdr	n	beta	se	p	p_fdr
Ala	736	-0.00514055	0.0170948	0.763724	0.872231	691	-0.00342249	0.0173005	0.843242	0.922709	676	-0.00787773	0.0175826	0.654272	0.865462	676	-0.00594582	0.017551	0.73489	0.898199
Arg	737	0.0441578	0.0324446	0.173934	0.41784	692	0.0500514	0.0324949	0.123965	0.350117	677	0.0475205	0.033296	0.153999	0.480384	677	0.044435	0.0332715	0.182173	0.532125
Asn	736	0.0369237	0.0183688	0.0447905	0.260841	691	0.0361995	0.0182111	0.0472463	0.252732	676	0.0342755	0.0186069	0.0659192	0.402769	676	0.0348964	0.0186343	0.0615603	0.396741
Asp	734	0.019144	0.0285852	0.503254	0.7012	689	0.0291804	0.0279024	0.296032	0.571498	674	0.0280483	0.02858	0.326765	0.660289	674	0.0300898	0.0286235	0.293548	0.639078
Cit	729	0.0397713	0.0204979	0.0527423	0.262456	684	0.0337919	0.0211359	0.110347	0.333571	670	0.0332724	0.0213321	0.119314	0.443249	670	0.0325638	0.021368	0.128014	0.45774
Gln	715	-0.0386074	0.0268929	0.151565	0.399407	674	-0.0347834	0.0273505	0.203912	0.443933	660	-0.041347	0.0274401	0.132359	0.445539	660	-0.0413657	0.0275069	0.133124	0.45774
Glu	671	0.030005	0.0188515	0.111947	0.329534	629	0.0254135	0.0193568	0.189717	0.421817	616	0.0240771	0.0196209	0.220269	0.555861	616	0.0242327	0.0196565	0.21814	0.579368
Gly	738	0.0152873	0.0164864	0.354099	0.598196	693	0.0157506	0.0165441	0.341423	0.609892	678	0.0129105	0.0168709	0.444397	0.749025	678	0.0128974	0.0169047	0.445773	0.739417
His	737	0.0553344	0.0153094	0.000322045	0.0585779	692	0.050568	0.0156524	0.00129557	0.0541549	677	0.0436487	0.0158778	0.00614322	0.183419	677	0.0410962	0.0157721	0.00938095	0.292016
Ile	735	0.0225959	0.0138872	0.104154	0.319536	690	0.0275486	0.0144405	0.0568573	0.258907	675	0.0288668	0.0146998	0.0499861	0.402769	675	0.0279404	0.01471	0.0579538	0.396741
Leu	736	0.0246222	0.0137677	0.0741323	0.306317	691	0.033112	0.0140646	0.0188483	0.247554	676	0.0350292	0.0143375	0.0148234	0.293404	676	0.0350686	0.0143659	0.014909	0.311599
Lys	610	0.0395911	0.0145972	0.00687638	0.159685	573	0.0416657	0.0147238	0.0048271	0.144123	560	0.0373937	0.0150338	0.0131743	0.293404	560	0.0375261	0.0150575	0.0129975	0.311599
Met	736	0.0313186	0.0162819	0.0548105	0.266404	691	0.0351578	0.0162317	0.0306658	0.247554	676	0.0321915	0.0165459	0.0521357	0.402769	676	0.0329301	0.0165686	0.0472871	0.396741
Orn	736	0.0341642	0.0213401	0.10983	0.327921	691	0.0377047	0.0203762	0.0646945	0.266423	676	0.0367373	0.0208095	0.0779652	0.407169	676	0.0371964	0.0208476	0.0748585	0.411722
Phe	738	0.0239679	0.0131163	0.0680624	0.296355	693	0.0294446	0.0131032	0.0249571	0.247554	678	0.0285138	0.0133852	0.033525	0.389262	678	0.0292168	0.0134005	0.0295947	0.388537
Pro	737	0.0244897	0.0143676	0.0887185	0.315819	692	0.0248006	0.0147109	0.0922905	0.311433	677	0.0194971	0.0150264	0.194911	0.520957	677	0.0196588	0.015056	0.192112	0.55002
Trp	733	0.0303942	0.0127554	0.0174395	0.177215	688	0.0284248	0.013253	0.0323326	0.247554	673	0.0299459	0.0135298	0.0272241	0.355615	673	0.0295185	0.0135543	0.0297832	0.388537
Ser	736	0.0172969	0.0181804	0.341721	0.593894	691	0.0172425	0.0180272	0.339182	0.609892	676	0.0151464	0.0184808	0.412761	0.71295	676	0.0154729	0.0185156	0.403648	0.703437
Thr	736	0.037407	0.0159198	0.0190573	0.177215	691	0.0352479	0.0164954	0.032975	0.247554	676	0.0255273	0.0166145	0.124916	0.443249	676	0.0245581	0.0166274	0.140169	0.45774
Tyr	735	0.0339352	0.0132322	0.0105321	0.177215	690	0.0338077	0.0133847	0.0117734	0.223694	675	0.0308338	0.0136024	0.0237312	0.355615	675	0.0308268	0.0136294	0.0240417	0.386517
Val	734	0.0332867	0.0114386	0.00372585	0.0973379	689	0.0381863	0.0117553	0.00121895	0.0541549	674	0.0390888	0.0119975	0.0011804	0.175092	674	0.0394077	0.0120171	0.00109655	0.196098
NEFA C12:0	736	0.0173843	0.0401174	0.664902	0.815871	691	0.00601276	0.0415237	0.88491	0.948442	676	-0.00394246	0.0417808	0.924852	0.958146	676	-0.00151485	0.0418058	0.971106	0.971106
NEFA C14:0	736	-0.00118661	0.0355964	0.973417	0.974262	691	-0.0124075	0.0368205	0.736243	0.874289	676	-0.0144797	0.0376166	0.700417	0.886878	676	-0.0128108	0.0376578	0.733825	0.898199
NEFA C14:1	738	-0.00940458	0.042003	0.822897	0.914816	693	-0.0267991	0.0433151	0.536324	0.765191	678	-0.0266826	0.0442913	0.547095	0.806037	678	-0.0236955	0.0443209	0.593085	0.831911
NEFA C15:0	734	0.0060462	0.0306841	0.843847	0.921902	690	-0.00377172	0.0312923	0.904098	0.95917	675	-0.00831328	0.0319188	0.794599	0.937106	675	-0.00656649	0.0319428	0.837191	0.935823
NEFA C15:1	637	-0.00207944	0.0394713	0.958002	0.971953	599	-0.00338897	0.0403763	0.933138	0.975129	587	-0.00782494	0.0411534	0.849268	0.937106	587	-0.0048787	0.0412223	0.905832	0.943331
NEFA C16:0	736	-0.0192838	0.0208314	0.354911	0.598196	691	-0.0222557	0.0214917	0.300789	0.571498	676	-0.0161069	0.0220084	0.464523	0.764451	676	-0.0136218	0.0219448	0.534996	0.816287
NEFA C16:1	739	-0.0418163	0.0361938	0.248332	0.501594	694	-0.0524448	0.0374043	0.161348	0.396725	679	-0.0421541	0.0381588	0.269696	0.615475	679	-0.0392771	0.0381679	0.303833	0.654651
NEFA C17:0	734	-0.0084066	0.0207023	0.684812	0.822561	690	-0.0107929	0.0209232	0.606141	0.808796	675	-0.00746789	0.0213854	0.727049	0.894488	675	-0.0049883	0.0213158	0.815044	0.935823
NEFA C17:1	735	-0.000902781	0.0279713	0.974262	0.974262	691	-0.00708051	0.028668	0.804998	0.922709	676	-0.00340167	0.0292957	0.907597	0.958146	676	-0.00187694	0.0293198	0.948977	0.962797
NEFA C18:0	733	-0.020108	0.0176616	0.255289	0.502947	688	-0.0226799	0.0181538	0.21199	0.452101	673	-0.0197351	0.0186611	0.290655	0.646243	673	-0.017363	0.0186	0.350915	0.690113
NEFA C18:1	736	-0.0205157	0.0266584	0.441804	0.662564	691	-0.0252162	0.0276532	0.362166	0.622653	676	-0.0170747	0.0282197	0.545349	0.806037	676	-0.0157351	0.0282477	0.577691	0.829014
NEFA C18:2	736	0.00148646	0.02739	0.956735	0.971953	691	-0.00111225	0.0285897	0.968979	0.98309	676	0.00543871	0.0291229	0.851915	0.937106	676	0.00817158	0.0290813	0.778807	0.920417
NEFA C18:3	735	-0.0362581	0.0344183	0.292489	0.545806	690	-0.0436012	0.0357657	0.223247	0.4713	676	-0.0374462	0.0366306	0.307038	0.650728	676	-0.035027	0.0366384	0.33942	0.690113
NEFA C20:0	580	-0.0170738	0.0220761	0.439605	0.662564	551	-0.0297639	0.0225639	0.187709	0.421817	540	-0.0268237	0.0229203	0.242418	0.584953	540	-0.0265061	0.0229431	0.248504	0.611027
NEFA C20:1	736	-0.00366105	0.0221529	0.868784	0.940808	691	-0.00772359	0.022759	0.734442	0.874289	676	-0.00259061	0.0231962	0.911109	0.958146	676	-0.00221813	0.0232362	0.923979	0.943331
NEFA C20:2	643	0.0144068	0.0264872	0.586692	0.764563	606	0.0074179	0.0271446	0.784739	0.91626	593	0.01352	0.0276725	0.625334	0.848667	593	0.0164641	0.0275606	0.550495	0.827722
NEFA C20:3	694	0.0194246	0.022829	0.395141	0.618635	656	0.015985	0.0237813	0.501722	0.748999	643	0.0170659	0.0243052	0.48285	0.770045	643	0.0187243	0.024335	0.44193	0.738906
NEFA C20:4	736	0.0150758	0.0222999	0.499228	0.700259	691	0.010635	0.0230335	0.644434	0.819526	676	0.0130656	0.0235647	0.579459	0.806037	676	0.0149031	0.0235568	0.527187	0.816287
NEFA C22:0	604	0.0102329	0.0336767	0.761343	0.872231	573	-0.00251467	0.0343979	0.941749	0.979231	561	0.00133288	0.0351288	0.969747	0.98387	561	0.00182976	0.0351998	0.958562	0.967019
NEFA C22:1	646	0.0185562	0.0260707	0.476876	0.692132	608	0.00908864	0.0267746	0.734393	0.874289	596	0.0162445	0.0272615	0.551495	0.806037	596	0.014739	0.0273288	0.589877	0.831911
NEFA C22:2	635	-0.00726756	0.0220107	0.741374	0.867418	598	-0.0123543	0.0225759	0.584429	0.793154	586	-0.00878745	0.0230211	0.702818	0.886878	586	-0.00844664	0.0230834	0.714564	0.894768
NEFA C22:6	736	-0.0212077	0.022063	0.336759	0.593894	691	-0.0209443	0.0226539	0.355544	0.622653	676	-0.0186936	0.023217	0.421016	0.716969	676	-0.0129694	0.0227509	0.568833	0.829014
NEFA C24:1	695	0.00114502	0.0169796	0.946255	0.971953	657	-0.000714445	0.0172562	0.966988	0.98309	644	0.00190382	0.0175722	0.913759	0.958146	644	0.00175059	0.0176129	0.920859	0.943331
NEFA C16:2	671	-0.0361537	0.0310983	0.245432	0.501594	629	-0.0404664	0.0320559	0.207304	0.446665	616	-0.0355046	0.032764	0.278965	0.626921	616	-0.0319959	0.0326278	0.327178	0.677032
NEFA C16:3	589	-0.0222349	0.0300115	0.459071	0.675756	555	-0.0300405	0.0309878	0.332771	0.604774	545	-0.0182486	0.0317228	0.56537	0.806037	545	-0.0152402	0.0315293	0.629039	0.85106
NEFA C18:4	660	-0.0898235	0.0384798	0.0198872	0.177215	618	-0.104323	0.039759	0.00891691	0.186363	605	-0.113453	0.0408316	0.0056376	0.183419	605	-0.109686	0.0406242	0.00713699	0.292016
NEFA C19:1	736	0.00607518	0.0250904	0.808747	0.908754	691	0.00422837	0.0255013	0.868357	0.945234	676	0.00528791	0.0260787	0.839381	0.937106	676	0.00703757	0.0260829	0.787389	0.920417
NEFA C20:5	668	-0.0218188	0.0348004	0.530898	0.725213	626	-0.0277253	0.0361026	0.442812	0.702632	611	-0.0245021	0.0367715	0.50546	0.77691	611	-0.0173502	0.0361212	0.631169	0.85106
NEFA C22:3	565	0.0104963	0.0248465	0.672865	0.817609	534	0.0154692	0.0249888	0.536161	0.765191	523	0.0215616	0.0255099	0.398392	0.699696	523	0.021853	0.0255747	0.393253	0.697493
NEFA C22:4	736	-0.00139101	0.020058	0.944731	0.971953	691	5.22512e-05	0.0206789	0.997985	0.997985	676	0.00425153	0.0211242	0.840556	0.937106	676	0.00742943	0.0209924	0.723521	0.894768
NEFA C22:5	737	0.00352242	0.0228089	0.877313	0.945146	692	0.0052901	0.0234364	0.821487	0.922709	677	0.0081158	0.0239793	0.735133	0.894488	677	0.0114736	0.0238551	0.630699	0.85106
NEFA C24:2	540	0.021034	0.0199087	0.291217	0.545806	505	0.0273461	0.0206463	0.185962	0.421817	494	0.0276334	0.0209254	0.187288	0.515199	494	0.0310956	0.0207644	0.134925	0.45774
NEFA C24:3	561	-0.0105672	0.0214523	0.622499	0.789148	530	-0.012677	0.0218285	0.561664	0.785897	518	-0.00738894	0.0223685	0.741292	0.89555	518	-0.00723861	0.0223981	0.746696	0.902279
NEFA C24:4	737	-0.00504695	0.0199926	0.800773	0.904657	692	-0.00511549	0.0205402	0.8034	0.922709	677	0.000865665	0.021015	0.967155	0.98387	677	0.00393689	0.0208929	0.850597	0.935823
NEFA C26:0	605	-0.018345	0.0262422	0.484788	0.693978	577	-0.0208487	0.0273313	0.445898	0.702632	565	-0.0144461	0.028009	0.606228	0.833563	565	-0.0129987	0.0280042	0.642714	0.861072
NEFA C26:3	637	0.0149152	0.0194654	0.443823	0.662564	598	0.00937544	0.0199283	0.638206	0.818313	585	0.0180957	0.0202818	0.372663	0.68758	585	0.0176867	0.0203188	0.384423	0.692624
NEFA C26:4	530	-0.00391261	0.0200822	0.845603	0.921902	492	-0.00798227	0.0209083	0.7028	0.86403	483	0.000438344	0.0213356	0.983617	0.988346	483	0.00212564	0.0212457	0.920348	0.943331
C14:0	723	-0.0190163	0.0155829	0.222738	0.500563	679	-0.0185917	0.0158323	0.240695	0.498072	664	-0.0275964	0.0160802	0.0866042	0.407169	664	-0.0263128	0.0160404	0.101402	0.45774
C15:1	725	-0.0167985	0.0264422	0.525438	0.722478	681	-0.00922212	0.0264329	0.727282	0.874289	666	-0.0189864	0.0268616	0.479929	0.770045	666	-0.0181391	0.0268827	0.500074	0.786696
C16:0	733	0.0019935	0.0103223	0.846915	0.921902	689	0.000514526	0.0107033	0.961673	0.98309	674	-0.00145727	0.0110027	0.894671	0.958146	674	-0.00149338	0.0110192	0.892238	0.943331
C16:1 n7	732	0.00820096	0.0151858	0.589333	0.764563	689	0.000753837	0.0157084	0.961739	0.98309	674	-0.00483105	0.0160773	0.763899	0.917557	674	-0.00473867	0.0161015	0.76862	0.917952
C17:0	722	-0.0178298	0.0164864	0.279843	0.53658	678	-0.0085297	0.0166638	0.60891	0.808796	663	-0.00934145	0.0169774	0.582352	0.806037	663	-0.00728403	0.0168531	0.665734	0.875482
C18:0	733	-0.00639841	0.0105101	0.542855	0.736732	689	-0.00538133	0.0107943	0.618267	0.808796	674	-0.0062473	0.0110721	0.572782	0.806037	674	-0.00615339	0.0110883	0.57912	0.829014
C18:1 n9	732	-0.00622684	0.0105172	0.553991	0.742206	688	-0.010017	0.0110149	0.363462	0.622653	673	-0.0104154	0.0112943	0.356768	0.68758	673	-0.0105154	0.0113116	0.352911	0.690113
C18:1 n7	734	0.0092089	0.0124331	0.459126	0.675756	690	0.00275847	0.0127136	0.828297	0.922709	675	0.00299401	0.013003	0.817964	0.937106	675	0.00244727	0.0130106	0.850858	0.935823
C18:2 n6	733	-0.0121294	0.0139013	0.3832	0.611365	689	-0.015598	0.0145838	0.285204	0.567693	674	-0.0152142	0.0149809	0.310204	0.650728	674	-0.0135678	0.0149116	0.363217	0.690113
C18:3 n6	722	0.0336327	0.0190146	0.0773542	0.306317	678	0.0344778	0.0195949	0.078945	0.292848	663	0.0270298	0.0200356	0.177777	0.515199	663	0.0275457	0.0200566	0.170102	0.519323
C18:3 n3	717	-0.0655	0.0296484	0.027475	0.197662	674	-0.0561727	0.0305369	0.0662871	0.266423	659	-0.0533405	0.0311987	0.0878	0.407169	659	-0.0497861	0.0308812	0.10741	0.45774
C20:1 n9	694	-0.00290158	0.0260854	0.911463	0.957265	651	0.0043267	0.027029	0.872872	0.945234	636	0.00520619	0.027781	0.851407	0.937106	636	0.00581945	0.0277868	0.834179	0.935823
C20:2 n6	720	0.0214605	0.0187913	0.253817	0.502947	676	0.0258974	0.0195928	0.186694	0.421817	661	0.0234593	0.0200962	0.243497	0.584953	661	0.0229046	0.0201098	0.255133	0.611042
C20:3 n9	734	0.0745052	0.0296682	0.0122436	0.177215	690	0.0562461	0.0304199	0.0648925	0.266423	675	0.0441505	0.0307094	0.150994	0.478149	675	0.0350558	0.0294093	0.233688	0.59562
C20:3 n6	732	0.00101765	0.0145184	0.944138	0.971953	688	0.00226384	0.0149368	0.879579	0.947587	673	8.8811e-05	0.0153972	0.9954	0.9954	673	-0.00151253	0.0152926	0.921243	0.943331
C20:4 n6	732	0.00156607	0.0118874	0.895224	0.950284	688	-0.000207489	0.0121143	0.98634	0.99587	673	0.000295839	0.0123797	0.980942	0.988346	673	0.000584625	0.0123942	0.962393	0.967019
C20:3 n3	714	0.00620599	0.0205637	0.762898	0.872231	670	0.0125515	0.0213097	0.55606	0.785247	655	0.00893752	0.0219087	0.683451	0.881736	655	0.00927873	0.0219327	0.672397	0.878318
C20:5 n3	729	-0.0654806	0.0269229	0.0152496	0.177215	685	-0.0632715	0.027912	0.0237165	0.247554	670	-0.0686658	0.0285914	0.0165983	0.293404	670	-0.0650107	0.0284004	0.022391	0.386517
C22:4 n6	716	0.026621	0.0160031	0.0966533	0.315819	672	0.0344717	0.0165371	0.0374963	0.247554	657	0.0361422	0.0169515	0.0333754	0.389262	657	0.0359185	0.016969	0.0346663	0.388537
C22:5 n6	734	0.0660597	0.0209938	0.00171853	0.0656521	690	0.0664835	0.0218863	0.00247524	0.086221	675	0.0613161	0.0222672	0.0060548	0.183419	675	0.0563763	0.0217586	0.00978045	0.292016
C22:5 n3	731	-0.0442972	0.026755	0.0982213	0.315819	687	-0.0243806	0.0266611	0.360799	0.622653	672	-0.0245858	0.0271916	0.366236	0.68758	672	-0.0221205	0.0271172	0.414945	0.716724
C22:6 n3	734	-0.0229152	0.0162276	0.158341	0.40079	690	-0.0146614	0.0164057	0.371809	0.627365	675	-0.0167544	0.0167203	0.316691	0.651292	675	-0.0152258	0.0166739	0.361494	0.690113
AC C10:0	673	-0.0119353	0.0266847	0.654828	0.813249	635	-0.00800642	0.0276711	0.772417	0.90694	621	-0.0128537	0.0283287	0.650185	0.865462	621	-0.0115442	0.0283176	0.683664	0.882012
AC C10:1	650	-0.0250708	0.0262124	0.33921	0.593894	616	-0.00238962	0.0270592	0.92966	0.975129	602	-0.00709051	0.027791	0.798708	0.937106	602	-0.00643892	0.0277747	0.816755	0.935823
AC C12:0	682	-0.0289878	0.0273072	0.288827	0.545806	644	-0.020088	0.027896	0.471731	0.719766	631	-0.0238335	0.0284561	0.402613	0.701218	631	-0.020238	0.0284129	0.476565	0.773115
AC C14:1	733	-0.0331663	0.0240489	0.16829	0.408983	691	-0.0295488	0.0248579	0.234978	0.491105	676	-0.0217727	0.0253373	0.390485	0.691621	676	-0.0195347	0.0253339	0.440936	0.738906
AC C16:0	738	-0.00550978	0.0278557	0.843259	0.921902	693	-0.011186	0.0285591	0.695419	0.860015	678	-0.0032428	0.028983	0.910948	0.958146	678	-0.00316649	0.0290425	0.913213	0.943331
AC C18:1	693	-0.0111179	0.0304095	0.714772	0.84536	655	-0.0153595	0.0302432	0.611725	0.808796	642	-0.016822	0.0301925	0.577623	0.806037	642	-0.0149434	0.0302543	0.621534	0.85106
AC C2:0	735	-0.0392252	0.0211765	0.0643945	0.292575	690	-0.0354393	0.0219111	0.106263	0.333571	675	-0.0382291	0.0224158	0.0885886	0.407169	675	-0.0353823	0.0223481	0.113857	0.45774
AC C3:0	737	-0.0168913	0.0239934	0.481661	0.693978	692	-0.0106638	0.0244554	0.662942	0.824955	677	-0.00485889	0.024752	0.844435	0.937106	677	-0.00444914	0.0248004	0.857681	0.935823
AC C8:1	736	-0.0734681	0.0369951	0.0474256	0.260841	692	-0.0652678	0.0387116	0.0922631	0.311433	677	-0.0632996	0.0390905	0.105866	0.41826	677	-0.0587865	0.0390384	0.132589	0.45774
H1	719	-0.00218331	0.064015	0.972802	0.974262	674	0.0130145	0.065274	0.842026	0.922709	659	0.014598	0.0669598	0.82749	0.937106	659	0.0114122	0.0669716	0.864748	0.936256
LPCa C14:0	736	0.0330842	0.0197331	0.0940595	0.315819	692	0.0321531	0.020189	0.111722	0.333571	677	0.0231912	0.0205785	0.260173	0.610967	677	0.0175572	0.0201345	0.383533	0.692624
LPCa C16:0	737	0.0210633	0.0158208	0.183489	0.426103	692	0.0232019	0.0161365	0.150944	0.383288	677	0.0218011	0.0165177	0.187345	0.515199	677	0.0180573	0.0162798	0.267759	0.614963
LPCa C16:1	737	0.0456117	0.0205565	0.0268085	0.197662	692	0.0420426	0.020662	0.0422678	0.247554	677	0.0391449	0.021182	0.0650523	0.402769	677	0.0296351	0.0198118	0.135184	0.45774
LPCa C18:0	738	0.0190539	0.0186375	0.306962	0.562764	693	0.0248351	0.0192025	0.196347	0.431962	678	0.0246519	0.0196214	0.209429	0.547134	678	0.0226983	0.0196033	0.247338	0.611027
LPCa C18:1	739	0.037474	0.0187432	0.0459469	0.260841	694	0.0369873	0.0187182	0.0485645	0.252732	679	0.0345588	0.0191304	0.0713037	0.402769	679	0.0263094	0.0180511	0.145461	0.460626
LPCa C18:2	736	0.0277013	0.0215989	0.20007	0.454506	691	0.0316203	0.0217096	0.145722	0.383288	676	0.027608	0.0222507	0.215138	0.555109	676	0.02128	0.0216468	0.325945	0.677032
LPCa C18:3	604	0.0169712	0.0346546	0.624512	0.789148	576	0.00751041	0.0355727	0.832865	0.922709	564	-0.00295408	0.0362836	0.935141	0.960199	564	-0.00683856	0.0356433	0.847923	0.935823
LPCa C20:3	736	0.0538812	0.0231748	0.0203501	0.177215	691	0.0554455	0.0232614	0.0174245	0.247554	676	0.0532359	0.0239034	0.0262808	0.355615	676	0.044708	0.0228474	0.0507987	0.396741
LPCa C20:4	735	0.0275744	0.0210665	0.19098	0.438625	690	0.0305831	0.0209076	0.144002	0.383288	675	0.0290629	0.0214495	0.175908	0.515199	675	0.0234625	0.0209486	0.263128	0.611042
LPCa C22:6	668	0.0519415	0.0242519	0.0325836	0.206363	629	0.0579905	0.02493	0.0203403	0.247554	616	0.0571148	0.0254454	0.0251626	0.355615	616	0.0532648	0.0252173	0.0350857	0.388537
LPCe C16:0	692	0.0417927	0.0251416	0.0969189	0.315819	654	0.0499456	0.0256911	0.0523303	0.252732	641	0.0432174	0.0260458	0.0975688	0.407169	641	0.0385748	0.0259216	0.137229	0.45774
LPCe C18:0	733	-0.00783926	0.0254721	0.758356	0.872231	688	-0.00319361	0.0258369	0.901664	0.95917	673	-0.0097014	0.0259514	0.708654	0.886878	673	-0.0098865	0.0260106	0.704	0.891733
LPCe C18:1	411	0.0391692	0.0348244	0.261364	0.505787	389	0.0264196	0.0363264	0.467511	0.719766	383	0.0159888	0.0367632	0.663884	0.86752	383	0.0102148	0.0365653	0.78013	0.920417
PCa C28:2	560	0.0334592	0.0353153	0.343833	0.593894	531	0.0297094	0.0370817	0.423396	0.691681	521	0.0250917	0.0376601	0.505549	0.77691	521	0.025982	0.0376912	0.490931	0.786696
PCa C30:0	737	0.0519716	0.0232207	0.0255158	0.197662	692	0.0487355	0.0239391	0.0421642	0.247554	677	0.0448677	0.0244992	0.0674993	0.402769	677	0.044842	0.0245481	0.0682038	0.396741
PCa C30:2	700	0.0205481	0.022475	0.360898	0.598647	660	0.0234335	0.0231447	0.311695	0.586885	645	0.0204783	0.0235862	0.385603	0.688811	645	0.0209858	0.0236064	0.374356	0.692393
PCa C32:0	739	0.0465133	0.0199929	0.0202686	0.177215	694	0.0419784	0.0204312	0.0403034	0.247554	679	0.0429181	0.0209802	0.0411914	0.402769	679	0.0448321	0.0209693	0.0328897	0.388537
PCa C32:1	737	0.0616853	0.0260472	0.0181378	0.177215	692	0.050641	0.026559	0.0569844	0.258907	677	0.0447957	0.0271433	0.0993569	0.407169	677	0.0407326	0.0270224	0.132205	0.45774
PCa C32:2	733	0.0341918	0.0210951	0.105493	0.319536	688	0.0332949	0.0220585	0.131675	0.362107	673	0.0300044	0.0226084	0.184932	0.515199	673	0.0290822	0.0226336	0.199284	0.553039
PCa C32:3	727	0.0411731	0.0217347	0.0585847	0.278277	683	0.0409147	0.0221931	0.0656939	0.266423	668	0.038438	0.0227669	0.0918333	0.407169	668	0.0365253	0.0227202	0.108412	0.45774
PCa C34:1	738	0.0311944	0.0179504	0.0826711	0.31415	693	0.0268049	0.0182716	0.142839	0.383288	678	0.0229455	0.0187201	0.220749	0.555861	678	0.0217352	0.0187328	0.246363	0.611027
PCa C34:2	736	0.022562	0.0199092	0.25749	0.502947	691	0.0226666	0.0206427	0.272583	0.547786	676	0.0195584	0.0212241	0.357121	0.68758	676	0.0209171	0.0212361	0.325002	0.677032
PCa C34:3	738	0.041414	0.0211633	0.0507475	0.262456	693	0.0402142	0.0220565	0.0687139	0.270966	678	0.034488	0.0225856	0.127248	0.443249	678	0.0336187	0.0226201	0.137702	0.45774
PCa C34:4	736	0.0417427	0.0238625	0.0806667	0.31221	692	0.0413795	0.0248935	0.0969302	0.321562	677	0.0279961	0.0252765	0.268446	0.615475	677	0.0266834	0.0253012	0.291986	0.639078
PCa C34:5	493	0.0665022	0.0466583	0.15472	0.399407	465	0.0692303	0.0483238	0.152665	0.383288	455	0.0560455	0.0494006	0.257208	0.610869	455	0.0558485	0.0495465	0.260285	0.611042
PCa C36:1	736	0.0298086	0.0181512	0.100979	0.31795	691	0.0289357	0.0185435	0.119135	0.341085	676	0.0245744	0.0189208	0.194474	0.520957	676	0.0232187	0.018928	0.220386	0.579368
PCa C36:2	735	0.0228133	0.0189474	0.228973	0.501594	690	0.0205784	0.0196206	0.294645	0.571498	675	0.0178523	0.0201716	0.376474	0.68758	675	0.0185523	0.0202025	0.358796	0.690113
PCa C36:3	736	0.0439649	0.0192133	0.0224124	0.187368	691	0.0416605	0.0195777	0.0337072	0.247554	676	0.0363933	0.0201114	0.070822	0.402769	676	0.0332562	0.0199866	0.0966107	0.45774
PCa C36:4	737	0.0259087	0.0178177	0.146355	0.39725	692	0.0259097	0.0180967	0.152687	0.383288	677	0.0218708	0.0184704	0.236806	0.582263	677	0.0226228	0.0184976	0.221767	0.579368
PCa C36:5	738	0.015841	0.0228877	0.489086	0.695367	693	0.0104134	0.023481	0.657562	0.824955	678	0.00224478	0.0239187	0.925257	0.958146	678	0.00637748	0.0237408	0.7883	0.920417
PCa C36:6	673	-0.00964954	0.0328632	0.769135	0.873637	629	-0.00322279	0.0339195	0.924336	0.975129	619	-0.0198244	0.0343123	0.563643	0.806037	619	-0.0179807	0.0343669	0.601032	0.837438
PCa C38:0	733	0.036049	0.023354	0.123129	0.347757	689	0.0331828	0.024017	0.167547	0.402498	674	0.0291689	0.0245198	0.234638	0.582263	674	0.0312581	0.0245101	0.202656	0.553039
PCa C38:2	612	0.0435109	0.0314071	0.166452	0.408983	579	0.0318681	0.0324333	0.326243	0.603405	568	0.0320176	0.0329564	0.331724	0.660289	568	0.0326145	0.0330095	0.323576	0.677032
PCa C38:3	736	0.0312782	0.0182407	0.086822	0.315819	691	0.0342365	0.0184812	0.0643957	0.266423	676	0.0292302	0.0189406	0.123257	0.443249	676	0.0277077	0.0189191	0.143533	0.460626
PCa C38:4	737	0.0249333	0.0175057	0.154794	0.399407	692	0.0289034	0.0177464	0.103849	0.333571	677	0.0263909	0.0180793	0.144848	0.47302	677	0.0280805	0.0180669	0.120612	0.45774
PCa C38:5	734	0.0556903	0.0169146	0.001042	0.0585779	689	0.0595229	0.0172051	0.000575566	0.0541549	674	0.0528451	0.0174725	0.00258934	0.175092	674	0.0524911	0.0175041	0.00281481	0.196098
PCa C38:6	735	0.00790206	0.0198188	0.690221	0.824321	690	0.016286	0.02015	0.419244	0.691681	676	0.0143454	0.0204607	0.483481	0.770045	676	0.0165347	0.0204247	0.4185	0.716938
PCa C40:0	572	0.047507	0.0307515	0.122946	0.347757	537	0.0350401	0.0316049	0.268081	0.543969	527	0.0256589	0.0319259	0.421948	0.716969	527	0.0281164	0.0319965	0.379966	0.692624
PCa C40:4	698	0.0393175	0.0214997	0.0678752	0.296355	659	0.0488556	0.0221277	0.0276086	0.247554	646	0.0439065	0.0225243	0.0517107	0.402769	646	0.0433481	0.0225773	0.0553196	0.396741
PCa C40:5	738	0.0544082	0.0250814	0.0303895	0.198481	693	0.0630793	0.0259328	0.0152601	0.245335	678	0.0534835	0.0263558	0.0428355	0.402769	678	0.0503222	0.0262849	0.0559966	0.396741
PCa C40:6	737	0.00519194	0.0226959	0.819119	0.914816	692	0.0184334	0.0229338	0.421818	0.691681	678	0.0172461	0.023259	0.45867	0.760809	678	0.0194139	0.0232434	0.403887	0.703437
PCa C42:0	493	0.0316383	0.0318898	0.321642	0.57951	466	0.0262183	0.0327359	0.423613	0.691681	456	0.0167904	0.0335825	0.617347	0.843303	456	0.0206344	0.0335607	0.538984	0.816287
PCa C42:1	385	-0.00456409	0.0347988	0.895722	0.950284	365	-0.00214336	0.0355348	0.951938	0.98309	357	-0.00286631	0.0363685	0.937228	0.960199	357	0.00359904	0.0361202	0.920689	0.943331
PCa C42:5	385	0.00448288	0.0329518	0.89186	0.950284	364	0.0150835	0.0345967	0.663122	0.824955	357	0.00352298	0.0354592	0.920917	0.958146	357	0.00639086	0.0353447	0.856622	0.935823
PCa C43:6	689	0.0137195	0.0259484	0.597173	0.7657	652	0.0173962	0.0266924	0.514814	0.763093	640	0.0113832	0.027275	0.676568	0.878277	640	0.0134513	0.0273084	0.622492	0.85106
PCa C44:12	690	0.0112037	0.0260715	0.667531	0.815871	651	0.00929436	0.0267825	0.728685	0.874289	638	0.00614368	0.0273942	0.822623	0.937106	638	0.00620599	0.0274596	0.821274	0.935823
PCe C32:0	739	0.0516677	0.0206002	0.0123564	0.177215	694	0.0472841	0.0213887	0.0273936	0.247554	679	0.0438521	0.0218998	0.0456561	0.402769	679	0.0427513	0.0219273	0.0516431	0.396741
PCe C32:1	739	0.0444162	0.0204634	0.0302931	0.198481	694	0.0369633	0.0211702	0.0812687	0.292848	679	0.0344448	0.0216431	0.111984	0.433419	679	0.0345752	0.0216867	0.111354	0.45774
PCe C32:2	700	0.0634813	0.026918	0.0186381	0.177215	660	0.0561451	0.0277977	0.0438253	0.247554	645	0.0469807	0.0281603	0.0957547	0.407169	645	0.0478313	0.0281622	0.08993	0.439871
PCe C34:0	739	0.0303517	0.0258216	0.240208	0.501594	694	0.0350697	0.0263392	0.183491	0.421817	679	0.0270665	0.0267146	0.311353	0.650728	679	0.0281793	0.0267546	0.292618	0.639078
PCe C34:1	737	0.0592388	0.0193694	0.00230805	0.0689118	692	0.055573	0.020092	0.0058332	0.152392	677	0.0501389	0.0205249	0.0148375	0.293404	677	0.0488065	0.0205371	0.0177666	0.337566
PCe C34:2	737	0.0441268	0.0189236	0.0199843	0.177215	692	0.0408245	0.0197334	0.0389498	0.247554	677	0.0373704	0.0201959	0.0647094	0.402769	677	0.0377509	0.0202339	0.0625307	0.396741
PCe C34:3	737	0.0389116	0.0232308	0.0943689	0.315819	692	0.0459633	0.0242282	0.0582466	0.259011	677	0.0412108	0.0246775	0.0954064	0.407169	677	0.0451439	0.0245286	0.0661568	0.396741
PCe C34:4	623	0.0249389	0.0447766	0.577758	0.764563	585	0.0252709	0.0460704	0.583548	0.793154	572	0.0168109	0.0472577	0.722182	0.894488	572	0.0169413	0.0473278	0.720513	0.894768
PCe C36:0	590	0.0136528	0.0280625	0.626788	0.789148	554	-0.000264365	0.0291205	0.99276	0.997533	543	-0.00275642	0.0296856	0.926055	0.958146	543	-0.00279147	0.0297489	0.925277	0.943331
PCe C36:1	737	0.0256356	0.022016	0.244644	0.501594	692	0.0239648	0.0226718	0.290881	0.571498	677	0.0201813	0.0230883	0.382391	0.688811	677	0.0213707	0.0231151	0.355552	0.690113
PCe C36:2	736	0.0363607	0.0210715	0.0848518	0.315819	691	0.038971	0.0217972	0.0742483	0.287368	676	0.0311453	0.0220958	0.159149	0.48206	676	0.0329944	0.0220906	0.135768	0.45774
PCe C36:3	735	0.0680963	0.0201004	0.000743012	0.0585779	690	0.0705849	0.0208384	0.000747559	0.0541549	675	0.0671639	0.0213637	0.00174372	0.175092	675	0.0650636	0.0213415	0.00239223	0.196098
PCe C36:4	737	0.0599457	0.018324	0.00112111	0.0585779	692	0.0632525	0.0189439	0.000887804	0.0541549	677	0.0568688	0.019314	0.00335104	0.175092	677	0.0559021	0.0193373	0.00396992	0.207428
PCe C36:5	737	0.039563	0.019852	0.0466506	0.260841	692	0.0398231	0.0203639	0.0509324	0.252732	677	0.0359612	0.0208504	0.0850535	0.407169	677	0.037793	0.0208413	0.0702365	0.396741
PCe C36:6	412	0.0955258	0.0811064	0.239585	0.501594	388	0.0645707	0.084847	0.447129	0.702632	383	0.0772228	0.0858102	0.368759	0.68758	383	0.0777311	0.0860778	0.367112	0.691229
PCe C38:0	734	0.0343615	0.0255027	0.178289	0.423437	689	0.0360443	0.0260573	0.167047	0.402498	674	0.027769	0.0265669	0.296299	0.650728	674	0.0335473	0.0262343	0.201442	0.553039
PCe C38:2	726	-0.00428489	0.035216	0.903191	0.953369	681	-0.00714513	0.0355599	0.840814	0.922709	666	-0.0235996	0.0362435	0.515189	0.785946	666	-0.0223361	0.036307	0.538641	0.816287
PCe C38:3	730	0.0216153	0.0262975	0.411379	0.636876	685	0.0193633	0.0268953	0.471808	0.719766	670	0.012649	0.0274837	0.645502	0.864807	670	0.0155444	0.0274508	0.571412	0.829014
PCe C38:4	736	0.038374	0.0174391	0.028092	0.197662	691	0.0439685	0.0180122	0.0149045	0.245335	676	0.03696	0.0182369	0.0431051	0.402769	676	0.0378065	0.0182605	0.0388104	0.396741
PCe C38:5	736	0.0402576	0.0183278	0.0283725	0.197662	691	0.041124	0.0189658	0.0304872	0.247554	676	0.0342776	0.0193475	0.0769166	0.407169	676	0.0340294	0.0193851	0.0796561	0.41791
PCe C38:6	737	0.02739	0.0198287	0.167606	0.408983	692	0.0322282	0.0205055	0.116497	0.338166	677	0.0230126	0.0208851	0.270927	0.615475	677	0.0248844	0.020873	0.233626	0.59562
PCe C40:0	734	0.0219499	0.0187905	0.243139	0.501594	690	0.0313759	0.0192245	0.103137	0.333571	676	0.031598	0.0195244	0.106066	0.41826	676	0.0337982	0.0194876	0.083332	0.42479
PCe C40:1	633	0.0357325	0.0310066	0.249597	0.501594	595	0.02168	0.0322363	0.501517	0.748999	585	0.0187015	0.0328498	0.569378	0.806037	585	0.0177322	0.032928	0.590435	0.831911
PCe C40:3	571	0.0543193	0.0377009	0.150205	0.399407	534	0.0441152	0.0385676	0.253224	0.518862	524	0.0266723	0.0387868	0.491983	0.770045	524	0.0299342	0.0388154	0.440956	0.738906
PCe C40:4	731	0.0295384	0.0220255	0.180315	0.423437	686	0.0325875	0.0225182	0.148326	0.383288	672	0.0223534	0.022884	0.329029	0.660289	672	0.0250201	0.0228305	0.273529	0.621387
PCe C40:5	732	0.0285355	0.024461	0.243774	0.501594	687	0.0336449	0.0247685	0.174808	0.415169	672	0.0257778	0.0252767	0.308195	0.650728	672	0.028549	0.0252369	0.258375	0.611042
PCe C40:6	735	0.0179536	0.0210892	0.394877	0.618635	690	0.0302853	0.021223	0.154049	0.383288	675	0.0205601	0.0213756	0.336485	0.663446	675	0.0243095	0.0211964	0.25186	0.611042
PCe C42:1	406	0.0350315	0.0386702	0.36554	0.598647	382	0.0222084	0.0405608	0.584349	0.793154	374	0.00988603	0.0405256	0.807415	0.937106	374	0.0131011	0.0405566	0.746863	0.902279
PCe C42:2	581	0.0202326	0.0370837	0.58556	0.764563	547	0.0186159	0.0384751	0.628699	0.813722	536	0.00609833	0.039241	0.876561	0.958146	536	0.00810967	0.0393151	0.836659	0.935823
PCe C42:3	492	0.0807662	0.038554	0.0367061	0.225634	465	0.0809314	0.0398773	0.0430008	0.247554	456	0.0760939	0.0404971	0.0609149	0.402769	456	0.078135	0.0404999	0.0543514	0.396741
PCe C42:4	673	-0.0233067	0.0258233	0.367098	0.598647	634	-0.0237105	0.0265519	0.372217	0.627365	624	-0.0278956	0.0271075	0.303862	0.650728	624	-0.0248486	0.0270867	0.359318	0.690113
PCe C42:5	639	0.0514057	0.0264207	0.052145	0.262456	601	0.0463347	0.0267406	0.0836735	0.296403	591	0.0410004	0.0273427	0.134301	0.445539	591	0.0428842	0.0273896	0.117976	0.45774
PCe C42:6	665	0.0405838	0.0270864	0.134539	0.371852	627	0.0555332	0.0273407	0.0426776	0.247554	612	0.0523124	0.0280279	0.062479	0.402769	612	0.0568052	0.0278881	0.0421098	0.396741
SMa C30:1	586	0.106415	0.0340818	0.00188475	0.0656521	550	0.0933478	0.035247	0.00832913	0.186363	539	0.0857891	0.0357776	0.0168462	0.293404	539	0.088046	0.0358003	0.014246	0.311599
SMa C32:1	738	0.032722	0.0182651	0.0736315	0.306317	693	0.0302459	0.018861	0.109269	0.333571	678	0.0272824	0.0192881	0.157704	0.48206	678	0.0269958	0.0193253	0.162915	0.508197
SMa C32:2	737	0.0406778	0.0230035	0.0774304	0.306317	692	0.0395769	0.0234828	0.0923869	0.311433	677	0.0347038	0.02402	0.148998	0.478149	677	0.0319334	0.0239733	0.183316	0.532125
SMa C33:1	737	0.0426255	0.0182205	0.0195863	0.177215	692	0.0416425	0.0189358	0.0282102	0.247554	677	0.0379307	0.0192316	0.0489971	0.402769	677	0.0383227	0.0192673	0.0471201	0.396741
SMa C34:0	730	0.0147953	0.0174441	0.396637	0.618635	686	0.00884678	0.0177912	0.619174	0.808796	671	0.0112265	0.018262	0.538938	0.806037	671	0.0104958	0.0182817	0.566091	0.829014
SMa C34:1	737	0.0250261	0.0150843	0.0975354	0.315819	692	0.0273083	0.0156056	0.0805953	0.292848	677	0.0265801	0.0160055	0.0972578	0.407169	677	0.0271762	0.0160304	0.0904998	0.439871
SMa C34:2	739	0.0284078	0.0180583	0.116131	0.337103	694	0.0285219	0.0186254	0.126157	0.351557	679	0.0255361	0.0190952	0.18159	0.515199	679	0.0243119	0.0191099	0.203751	0.553039
SMa C35:1	737	0.0310021	0.0189305	0.101927	0.31795	692	0.0348101	0.0196431	0.0768298	0.291953	677	0.0312566	0.0199609	0.117861	0.443249	677	0.0323106	0.0199825	0.106376	0.45774
SMa C36:0	500	0.0209606	0.0219665	0.340451	0.593894	475	0.00700471	0.0219457	0.749734	0.885279	467	0.0131954	0.0221693	0.552006	0.806037	467	0.0123762	0.0221305	0.576283	0.829014
SMa C36:1	738	0.019253	0.0162248	0.235763	0.501594	693	0.0152186	0.0166191	0.360142	0.622653	678	0.0150449	0.017066	0.378334	0.68758	678	0.0145885	0.0170963	0.3938	0.697493
SMa C36:2	739	0.0171316	0.0184393	0.353159	0.598196	694	0.0147364	0.0186609	0.429987	0.696442	679	0.0131167	0.0191541	0.493713	0.770045	679	0.0120043	0.0191732	0.531471	0.816287
SMa C36:3	671	0.00972357	0.0267083	0.715926	0.84536	636	0.00555426	0.0276312	0.840754	0.922709	623	0.00747168	0.0282065	0.791184	0.937106	623	0.00711795	0.0282458	0.801128	0.930198
SMa C38:1	618	0.0157729	0.0195892	0.421031	0.647026	580	0.012598	0.020229	0.533689	0.765191	570	0.00898137	0.0206727	0.66413	0.86752	570	0.00801206	0.0207075	0.698969	0.891733
SMa C38:2	737	0.0212959	0.0184456	0.248669	0.501594	692	0.0196363	0.0189055	0.299343	0.571498	677	0.0176923	0.0194174	0.36255	0.68758	677	0.0173081	0.0194537	0.373953	0.692393
SMa C38:3	724	0.0150556	0.0254032	0.553594	0.742206	681	0.0145413	0.0261276	0.578025	0.793154	666	0.0146965	0.0265681	0.580344	0.806037	666	0.0149545	0.0266072	0.574281	0.829014
SMa C39:1	734	0.0120002	0.022419	0.592628	0.764563	689	0.0132103	0.0228893	0.564041	0.785897	674	0.00781344	0.0231768	0.736134	0.894488	674	0.00956498	0.0231799	0.680006	0.882012
SMa C40:1	677	0.00813709	0.0183506	0.657603	0.813249	634	0.00645533	0.018952	0.733511	0.874289	622	0.00397472	0.0193605	0.837407	0.937106	622	0.00297508	0.0193759	0.87802	0.936256
SMa C40:2	738	0.0085551	0.0189321	0.651489	0.813249	693	0.0125181	0.0194693	0.520466	0.765191	678	0.0074698	0.0198726	0.707125	0.886878	678	0.00759949	0.0199119	0.702842	0.891733
SMa C40:3	451	0.0243698	0.0309302	0.431183	0.65779	423	0.0197217	0.0320123	0.538196	0.765191	415	0.0111097	0.0325545	0.733087	0.894488	415	0.0103401	0.032651	0.751652	0.902846
SMa C40:4	728	0.0196098	0.0191111	0.305196	0.562764	684	0.0189008	0.0193829	0.329854	0.604733	669	0.0139159	0.0197725	0.481811	0.770045	669	0.0143782	0.0198017	0.468036	0.770233
SMa C40:5	664	0.0646227	0.0268672	0.0164399	0.177215	625	0.0583713	0.0275241	0.0343525	0.247554	612	0.0473894	0.0281043	0.0922894	0.407169	612	0.0506392	0.0279199	0.0702309	0.396741
SMa C41:1	736	0.00120342	0.0210797	0.95449	0.971953	691	0.0048404	0.0216593	0.823231	0.922709	676	0.00217356	0.0221296	0.921788	0.958146	676	0.00343629	0.02215	0.876762	0.936256
SMa C41:2	736	0.0390411	0.0220964	0.0776784	0.306317	692	0.0443938	0.0229227	0.0532068	0.252732	677	0.0355508	0.023271	0.127077	0.443249	677	0.0366827	0.023299	0.115876	0.45774
SMa C42:1	738	0.0123573	0.0169204	0.465433	0.680249	693	0.0131397	0.0177226	0.458706	0.715445	678	0.016483	0.0180925	0.362611	0.68758	678	0.0171183	0.0181218	0.3452	0.690113
SMa C42:2	735	0.0401421	0.0169686	0.0182629	0.177215	690	0.0391353	0.0175863	0.0263941	0.247554	675	0.0377279	0.0180444	0.0369321	0.402769	675	0.0381135	0.0180712	0.0353216	0.388537
SMa C42:3	739	0.0191331	0.021307	0.3695	0.598647	694	0.0172896	0.0220472	0.433194	0.696442	679	0.0167627	0.0224299	0.455129	0.760809	679	0.0159796	0.022467	0.477186	0.773115
SMa C42:4	481	0.0215403	0.0238568	0.367041	0.598647	455	0.0170176	0.0241155	0.480771	0.728124	447	0.00943559	0.0245169	0.700532	0.886878	447	0.0105285	0.0243773	0.666036	0.875482
SMa C42:5	434	0.0562767	0.0399021	0.159165	0.40079	410	0.0661712	0.041698	0.113338	0.333629	404	0.0569015	0.0421149	0.177459	0.515199	404	0.0575309	0.0422339	0.173936	0.519323
SMa C42:6	727	0.0186087	0.0209213	0.374057	0.601368	683	0.0288807	0.0214235	0.178095	0.418222	669	0.0280828	0.0217405	0.196917	0.520957	669	0.0295899	0.0217328	0.173822	0.519323
SMa C43:2	689	0.0162916	0.0240717	0.498768	0.700259	650	0.015639	0.0250622	0.532852	0.765191	637	0.0162837	0.0253922	0.521576	0.789922	637	0.0171501	0.0254487	0.500625	0.786696
SMa C44:6	435	0.0118103	0.0359829	0.742908	0.867418	416	0.0187753	0.0369867	0.612	0.808796	411	0.00527259	0.0375045	0.88827	0.958146	411	0.00661283	0.0373884	0.859703	0.935823
SMa C21:2	470	0.00518081	0.0501759	0.917807	0.959109	444	0.0129456	0.0503983	0.797407	0.922709	436	0.0098863	0.0513559	0.84744	0.937106	436	0.00793777	0.0514449	0.877451	0.936256
SMa C31:1	401	0.0815937	0.0480614	0.0903629	0.315819	377	0.102637	0.0498642	0.0402793	0.247554	371	0.090279	0.0515126	0.0805506	0.407169	371	0.0906555	0.0516295	0.0799827	0.41791
SMa C35:2	644	0.0386155	0.0258167	0.135219	0.371852	601	0.0434345	0.0269978	0.108203	0.333571	588	0.0414711	0.0276486	0.134192	0.445539	588	0.0410989	0.0277104	0.138593	0.45774
SMa C37:2	436	0.0180282	0.0324027	0.578244	0.764563	416	0.015347	0.0334875	0.646994	0.819526	410	0.0161676	0.0340786	0.635465	0.856853	410	0.0156333	0.0341243	0.647117	0.861449
SMa C37:3	708	-0.0213785	0.0325813	0.511941	0.708581	665	-0.00784955	0.0338081	0.816473	0.922709	651	-0.0237222	0.0345717	0.492858	0.770045	651	-0.0236983	0.0346391	0.494135	0.786696
SMa C39:4	516	0.0312553	0.0313312	0.318965	0.57951	485	0.0318863	0.0323059	0.32415	0.603405	478	0.0328952	0.0328962	0.317855	0.651292	478	0.0357966	0.0329609	0.27804	0.624843
SMa C39:5	684	0.0501532	0.0258017	0.0523397	0.262456	646	0.0531931	0.0267646	0.0473112	0.252732	633	0.0510164	0.0273811	0.0629167	0.402769	633	0.0518478	0.0274391	0.0592937	0.396741
SMa C41:5	558	0.0597443	0.0319281	0.0618522	0.287269	526	0.0655743	0.0333165	0.0495891	0.252732	519	0.0625233	0.0337154	0.0642692	0.402769	519	0.0623367	0.0338028	0.0657619	0.396741
SMa C43:0	350	0.0128625	0.0314594	0.682899	0.822561	331	0.0160113	0.0332758	0.630732	0.813722	326	0.00862693	0.0342318	0.801198	0.937106	326	0.0122538	0.0339372	0.718295	0.894768

## Sheet: Factor2
	Crude model					Main model					Main model +					Main model ++
	Not Adjusted					Adjusted for city, sex, gestational age, smoking, materanl education, maternal age					Main model, further adjusted for maternal BMI, and maternal gestational weight gain					Main model +, further adjusted for birth weight
Metabolite	n	beta	se	p	p_fdr	n	beta	se	p	p_fdr	n	beta	se	p	p_fdr	n	beta	se	p	p_fdr
Ala	736	0.0313971	0.017432	0.0721033	0.320629	691	0.0249532	0.0178967	0.163695	0.551811	676	0.022363	0.0181056	0.217225	0.59596	676	0.0204711	0.0180738	0.257784	0.640429
Arg	737	-0.0328497	0.0332026	0.322815	0.688656	692	-0.0292477	0.0337087	0.385892	0.739274	677	-0.0384257	0.0343366	0.263516	0.64794	677	-0.0353737	0.0343057	0.302864	0.661652
Asn	736	0.0458472	0.018753	0.0147328	0.178758	691	0.0334972	0.0188768	0.0764341	0.45185	676	0.0291857	0.0191839	0.128655	0.517096	676	0.028673	0.0192165	0.136158	0.519394
Asp	734	0.0366859	0.0291483	0.208588	0.559859	689	0.0329441	0.0288602	0.254071	0.633381	674	0.0287974	0.0294098	0.327859	0.696832	674	0.0274772	0.0294314	0.350858	0.691787
Cit	729	0.00173473	0.0209341	0.933981	0.998579	684	-0.00430964	0.0218499	0.843702	0.94803	670	-0.00736413	0.0220501	0.738509	0.92461	670	-0.00666186	0.0220795	0.762962	0.921728
Gln	715	0.0188761	0.0276329	0.494771	0.777497	674	0.00515789	0.0283881	0.855881	0.951485	660	0.00456929	0.0283469	0.871993	0.956702	660	0.00447671	0.0284036	0.874814	0.94351
Glu	671	0.00990017	0.0191034	0.604465	0.864761	629	0.00865252	0.0198617	0.663254	0.877342	616	0.00467229	0.0199958	0.815328	0.946321	616	0.00457916	0.0200295	0.819243	0.94351
Gly	738	0.0409764	0.0167767	0.0148269	0.178758	693	0.0319206	0.0170929	0.0622731	0.445694	678	0.0298388	0.0173391	0.0857451	0.459506	678	0.02995	0.0173717	0.0851706	0.415918
His	737	-0.000479002	0.015749	0.975745	0.998677	692	-0.00439354	0.0162947	0.787528	0.935681	677	-0.00547178	0.0164031	0.738803	0.92461	677	-0.0028613	0.0162841	0.860576	0.94351
Ile	735	-0.012026	0.0142659	0.399513	0.740556	690	-0.0186614	0.0150358	0.214996	0.591239	675	-0.0195817	0.0152228	0.198784	0.590207	675	-0.0186498	0.0152304	0.221205	0.585213
Leu	736	-0.00236625	0.0141058	0.866827	0.998579	691	-0.01167	0.0146196	0.425014	0.742289	676	-0.0135986	0.0148277	0.359429	0.729328	676	-0.0135838	0.0148555	0.360848	0.704833
Lys	610	0.00485993	0.0152664	0.750337	0.944702	573	4.51569e-05	0.0155392	0.997682	0.997682	560	0.00123793	0.0157509	0.937385	0.981732	560	0.00108348	0.0158057	0.945373	0.983616
Met	736	0.0474806	0.0166477	0.00446828	0.104533	691	0.0397234	0.0168691	0.0188216	0.315098	676	0.0367505	0.0171067	0.0320586	0.361499	676	0.0361805	0.0171325	0.0350856	0.316264
Orn	736	0.0315998	0.0218835	0.149174	0.472385	691	0.0173693	0.0212244	0.413442	0.742289	676	0.0144094	0.0215573	0.504103	0.803676	676	0.0140725	0.0215966	0.514886	0.787062
Phe	738	0.0206752	0.0134033	0.123381	0.422733	693	0.0133946	0.0136052	0.325216	0.712382	678	0.0123862	0.0138211	0.37049	0.730494	678	0.0117928	0.0138386	0.394432	0.723572
Pro	737	0.0156491	0.0147023	0.287505	0.653135	692	0.00521542	0.0152718	0.732831	0.914684	677	0.0023591	0.0155102	0.879155	0.956702	677	0.00225193	0.0155396	0.884823	0.94351
Trp	733	-0.0206845	0.0130292	0.112831	0.407096	688	-0.0313758	0.0136852	0.0221784	0.315098	673	-0.0325708	0.0138962	0.0193877	0.346055	673	-0.0321756	0.0139175	0.0210985	0.316264
Ser	736	0.0516222	0.0185043	0.00541477	0.104533	691	0.0424252	0.018617	0.0229918	0.315098	676	0.0408525	0.0189876	0.0318025	0.361499	676	0.0406573	0.0190225	0.0329452	0.316264
Thr	736	-0.0104479	0.0163122	0.522054	0.796418	691	-0.0111301	0.0171087	0.51556	0.822534	676	-0.0131297	0.0171067	0.44305	0.791432	676	-0.0121442	0.0171171	0.478283	0.766733
Tyr	735	0.0116559	0.0135327	0.389352	0.740556	690	0.00299356	0.0138835	0.829349	0.947722	675	0.00228466	0.0140225	0.870626	0.956702	675	0.00237102	0.014049	0.866032	0.94351
Val	734	-0.0154156	0.0117455	0.189786	0.550906	689	-0.0220437	0.0122375	0.0721058	0.45185	674	-0.0252871	0.0124177	0.042119	0.373733	674	-0.02557	0.0124376	0.0401979	0.316264
NEFA C12:0	736	-0.00615993	0.0409669	0.88052	0.998579	691	-0.0170142	0.0430528	0.692828	0.909577	676	-0.0420099	0.0431008	0.330078	0.696832	676	-0.0449524	0.0431339	0.297727	0.661652
NEFA C14:0	736	-0.0454487	0.0363279	0.211318	0.559859	691	-0.0623907	0.0381148	0.102122	0.472442	676	-0.0760401	0.0387322	0.0500469	0.3874	676	-0.0783305	0.0387826	0.0438226	0.316264
NEFA C14:1	738	-0.0513751	0.0428564	0.231011	0.57649	693	-0.0752183	0.0448397	0.0939144	0.472442	678	-0.0851454	0.04563	0.0624918	0.395195	678	-0.0884995	0.0456473	0.0529629	0.316264
NEFA C15:0	734	-0.0297245	0.0312981	0.342574	0.707153	690	-0.0520148	0.0323481	0.108316	0.472442	675	-0.0619734	0.0328234	0.0594617	0.388359	675	-0.0642772	0.0328532	0.0508374	0.316264
NEFA C15:1	637	-0.00419052	0.0401482	0.916904	0.998579	599	-0.0294101	0.0416567	0.480467	0.791047	587	-0.0353511	0.0422153	0.402724	0.765175	587	-0.0371846	0.0422281	0.378932	0.713484
NEFA C16:0	736	-0.00520619	0.0212945	0.806925	0.975131	691	-0.013639	0.0223018	0.541034	0.829493	676	-0.0159825	0.0227265	0.482152	0.793462	676	-0.0190957	0.0226637	0.39978	0.723572
NEFA C16:1	739	-0.0401187	0.0369292	0.277679	0.644833	694	-0.0595998	0.0387377	0.124388	0.500996	679	-0.0647932	0.0393202	0.0998697	0.473882	679	-0.0679365	0.0393139	0.0844539	0.415918
NEFA C17:0	734	-0.00733977	0.021154	0.728718	0.934368	690	-0.0240252	0.0216862	0.268324	0.653271	675	-0.0279104	0.0220549	0.206149	0.590207	675	-0.0310552	0.0219846	0.158258	0.519394
NEFA C17:1	735	-0.0160335	0.0285731	0.574877	0.840206	691	-0.0358205	0.0297019	0.228246	0.60384	676	-0.0398042	0.0302105	0.188116	0.590207	676	-0.0417852	0.0302433	0.167562	0.522692
NEFA C18:0	733	0.0014914	0.0180472	0.934162	0.998579	688	-0.00290944	0.018824	0.877215	0.954885	673	-0.0038155	0.0192596	0.843022	0.947267	673	-0.00646883	0.0191946	0.736217	0.910431
NEFA C18:1	736	-0.0254342	0.0272306	0.350602	0.707153	691	-0.0373635	0.0286618	0.192821	0.57578	676	-0.0390111	0.0291075	0.180636	0.590207	676	-0.0407992	0.0291432	0.162005	0.519394
NEFA C18:2	736	-0.0426299	0.0279381	0.127483	0.42974	691	-0.0492361	0.0295903	0.0965981	0.472442	676	-0.0568421	0.02999	0.0584883	0.388359	676	-0.060321	0.0299495	0.0444134	0.316264
NEFA C18:3	735	-0.0179031	0.0351758	0.610937	0.864761	690	-0.0303047	0.0371116	0.41446	0.742289	676	-0.0383723	0.0378251	0.310739	0.690131	676	-0.041525	0.0378396	0.272877	0.648084
NEFA C20:0	580	0.00860868	0.0227627	0.705429	0.929839	551	0.00388264	0.0235418	0.869066	0.954885	540	0.00676772	0.023844	0.776652	0.938267	540	0.00610757	0.0238884	0.798307	0.94351
NEFA C20:1	736	-0.00836297	0.0226311	0.711838	0.929839	691	-0.0198968	0.0235938	0.399361	0.739274	676	-0.0164266	0.0239438	0.492929	0.802479	676	-0.0169345	0.0239943	0.480584	0.766733
NEFA C20:2	643	-0.0167584	0.0270523	0.535823	0.805663	606	-0.0179549	0.028192	0.524453	0.82626	593	-0.020995	0.0286182	0.46348	0.793462	593	-0.0255141	0.0285273	0.371501	0.713443
NEFA C20:3	694	-0.0167067	0.0232861	0.473342	0.76039	656	-0.0174701	0.0245712	0.477348	0.791047	643	-0.0197382	0.0250282	0.430626	0.787966	643	-0.0212735	0.0250513	0.396102	0.723572
NEFA C20:4	736	-0.0389653	0.0226997	0.0864921	0.361537	691	-0.0310577	0.0238259	0.192845	0.57578	676	-0.0327705	0.0242731	0.177465	0.590207	676	-0.0349577	0.0242689	0.150228	0.519394
NEFA C22:0	604	-0.00428623	0.0352444	0.903246	0.998579	573	-0.00392402	0.0360084	0.913262	0.963999	561	-0.00762638	0.0367591	0.835722	0.946321	561	-0.00855922	0.0369145	0.816731	0.94351
NEFA C22:1	646	-0.00300787	0.0267332	0.910452	0.998579	608	-0.0036299	0.0277405	0.895937	0.955362	596	-0.00189185	0.028207	0.946549	0.981732	596	-0.000565162	0.0282546	0.984048	0.993556
NEFA C22:2	635	-0.000773919	0.0225019	0.972574	0.998677	598	0.00100314	0.0233323	0.965722	0.973514	586	0.00357183	0.0237456	0.880487	0.956702	586	0.00321748	0.0238055	0.892536	0.946904
NEFA C22:6	736	0.000228019	0.0225584	0.991938	0.998677	691	-0.000961048	0.0235118	0.967408	0.973514	676	-0.00161985	0.0239879	0.946182	0.981732	676	-0.00839616	0.0235057	0.721061	0.902162
NEFA C24:1	695	-0.0102434	0.0173492	0.555104	0.817019	657	-0.00654462	0.017846	0.713946	0.909845	644	-0.00371323	0.0181148	0.837653	0.946321	644	-0.00356948	0.0181535	0.844184	0.94351
NEFA C16:2	671	-0.00854286	0.031491	0.786262	0.972359	629	-0.0146702	0.0329382	0.6562	0.877342	616	-0.0199596	0.0334458	0.550887	0.828737	616	-0.024116	0.0333037	0.469278	0.766244
NEFA C16:3	589	-0.0236312	0.029927	0.43007	0.742018	555	-0.0193266	0.0313581	0.537948	0.829493	545	-0.0251219	0.0319692	0.432333	0.787966	545	-0.032336	0.0318365	0.310248	0.661652
NEFA C18:4	660	0.00128979	0.0392118	0.97377	0.998677	618	-0.0143441	0.0412386	0.72809	0.914684	605	-0.0173088	0.0420656	0.680879	0.890219	605	-0.0232794	0.0418605	0.578345	0.811236
NEFA C19:1	736	-0.0109021	0.0256318	0.670718	0.922238	691	-0.0273838	0.0264278	0.300498	0.676455	676	-0.0313827	0.0269014	0.243808	0.623904	676	-0.0335908	0.0269132	0.21244	0.582637
NEFA C20:5	668	0.00306092	0.0356281	0.931562	0.998579	626	0.00283602	0.0374384	0.939642	0.972204	611	0.000651178	0.0379084	0.986301	0.99583	611	-0.00734268	0.037235	0.843741	0.94351
NEFA C22:3	565	-0.0011461	0.024714	0.963029	0.998677	534	-0.00462826	0.0253102	0.85498	0.951485	523	-0.00119438	0.0256939	0.962942	0.981732	523	-0.00122026	0.0257196	0.962178	0.983616
NEFA C22:4	736	-0.0330676	0.0204713	0.106684	0.406133	691	-0.0306625	0.0214316	0.152983	0.542056	676	-0.0279327	0.0218117	0.200782	0.590207	676	-0.0317935	0.0216761	0.14293	0.519394
NEFA C22:5	737	-0.051267	0.0232236	0.0275919	0.233029	692	-0.048753	0.0242334	0.0446422	0.388759	677	-0.0496481	0.0246844	0.0447049	0.373733	677	-0.0537243	0.0245527	0.029017	0.316264
NEFA C24:2	540	-0.0169029	0.0198988	0.396023	0.740556	505	-0.0181266	0.0209316	0.386925	0.739274	494	-0.0220073	0.0212079	0.299947	0.680571	494	-0.0235393	0.0210278	0.263526	0.640429
NEFA C24:3	561	-0.0186609	0.0218801	0.394105	0.740556	530	-0.0288369	0.0227043	0.204627	0.583085	518	-0.0279565	0.0230503	0.225767	0.597282	518	-0.0283224	0.0231002	0.220758	0.585213
NEFA C24:4	737	-0.0137219	0.0204193	0.501794	0.778468	692	-0.0112478	0.0212989	0.597611	0.855485	677	-0.00951003	0.0216951	0.661279	0.880302	677	-0.013154	0.0215737	0.542258	0.797942
NEFA C26:0	605	-0.0218201	0.0272611	0.423794	0.742018	577	-0.0234803	0.0286671	0.413099	0.742289	565	-0.0262653	0.0291586	0.368109	0.730494	565	-0.0284724	0.0291676	0.329421	0.664652
NEFA C26:3	637	0.0157084	0.0196522	0.424412	0.742018	598	0.0120282	0.0204065	0.555806	0.835708	585	0.014093	0.0206541	0.49531	0.802479	585	0.0147947	0.020712	0.475335	0.766733
NEFA C26:4	530	0.00486118	0.0206021	0.813561	0.977208	492	0.00847018	0.0217494	0.697124	0.909577	483	0.0112193	0.0220937	0.611833	0.864007	483	0.0107433	0.0219894	0.625383	0.837852
C14:0	723	-0.00803761	0.0160189	0.61599	0.864761	679	-0.0276057	0.0163563	0.0919215	0.472442	664	-0.031948	0.0165179	0.0535277	0.388359	664	-0.0340033	0.0164789	0.0394653	0.316264
C15:1	725	0.00113933	0.0274065	0.966852	0.998677	681	-0.0264043	0.0276058	0.339175	0.714366	666	-0.034049	0.0278796	0.222416	0.59596	666	-0.0354544	0.0279173	0.204545	0.582637
C16:0	733	-0.019218	0.0106426	0.0713684	0.320629	689	-0.0218372	0.01111	0.0497568	0.399968	674	-0.0230532	0.0113419	0.0424939	0.373733	674	-0.0230716	0.0113671	0.0427878	0.316264
C16:1 n7	732	0.00466766	0.0157021	0.766349	0.959084	689	-0.000676587	0.0163618	0.967028	0.973514	674	-0.00243849	0.0166293	0.883462	0.956702	674	-0.00259492	0.0166678	0.876329	0.94351
C17:0	722	-0.00857414	0.0171131	0.616504	0.864761	678	-0.0236314	0.0174138	0.175224	0.567471	663	-0.0257986	0.0176235	0.14371	0.536347	663	-0.0286334	0.0174932	0.102149	0.435699
C18:0	733	-0.0216525	0.0108333	0.0460112	0.259901	689	-0.0243128	0.0111995	0.0302859	0.359142	674	-0.0254587	0.0114087	0.0259804	0.361499	674	-0.0256831	0.0114329	0.0250058	0.316264
C18:1 n9	732	-0.00561234	0.0108626	0.605546	0.864761	688	-0.00801824	0.0114626	0.484469	0.791047	673	-0.00863021	0.0116745	0.460027	0.793462	673	-0.0085407	0.0117001	0.465667	0.766244
C18:1 n7	734	-0.00943084	0.0128456	0.463079	0.756122	690	-0.0111767	0.0132279	0.398443	0.739274	675	-0.0094907	0.013441	0.480375	0.793462	675	-0.00871307	0.0134595	0.517626	0.787062
C18:2 n6	733	-0.0398057	0.0142961	0.00550175	0.104533	689	-0.0371035	0.0151268	0.014424	0.315098	674	-0.0415544	0.0154183	0.00721451	0.251305	674	-0.0440974	0.0153442	0.00418454	0.215554
C18:3 n6	722	-0.0124629	0.0197875	0.529001	0.801168	678	-0.0180594	0.0205746	0.380394	0.739274	663	-0.0228862	0.0208773	0.273386	0.653583	663	-0.0235707	0.0209077	0.26	0.640429
C18:3 n3	717	0.0183315	0.0307834	0.551698	0.817019	674	-0.00312394	0.0319727	0.922195	0.968536	659	-0.0078117	0.0324513	0.809848	0.946321	659	-0.0135399	0.0321291	0.673586	0.874179
C20:1 n9	694	0.0298497	0.0270977	0.271036	0.636479	651	-0.00337602	0.02843	0.905512	0.96067	636	-0.00357278	0.028969	0.901885	0.966635	636	-0.00443311	0.0289806	0.878473	0.94351
C20:2 n6	720	-0.0148104	0.0197477	0.453512	0.748647	676	-0.0312366	0.0207949	0.133537	0.525568	661	-0.033183	0.0211625	0.117367	0.514262	661	-0.0323932	0.0211879	0.126788	0.504322
C20:3 n9	734	0.0475221	0.0307283	0.12241	0.422733	690	0.0403414	0.0316979	0.203565	0.583085	675	0.0438975	0.0317539	0.167305	0.582781	675	0.0569771	0.0303784	0.0611523	0.345428
C20:3 n6	732	-0.0100366	0.0149719	0.502838	0.778468	688	-0.0146399	0.0155244	0.346004	0.714366	673	-0.0153529	0.0158953	0.33446	0.699021	673	-0.0122602	0.0158124	0.438408	0.756715
C20:4 n6	732	-0.0357446	0.0121937	0.0034797	0.104533	688	-0.0341278	0.0125225	0.0065895	0.275441	673	-0.0348087	0.0127186	0.00636997	0.251305	673	-0.0353306	0.0127406	0.00570963	0.215554
C20:3 n3	714	-3.53231e-05	0.0212983	0.998677	0.998677	670	-0.0260019	0.0222606	0.2432	0.633381	655	-0.0278903	0.0227325	0.220312	0.59596	655	-0.0284853	0.0227719	0.211426	0.582637
C20:5 n3	729	0.0689919	0.0279145	0.0136812	0.178758	685	0.0512111	0.0292073	0.0799927	0.45185	670	0.0488521	0.0297434	0.100974	0.473882	670	0.0438588	0.0295604	0.138366	0.519394
C22:4 n6	716	-0.0144906	0.0167362	0.386877	0.740556	672	-0.0241731	0.0174944	0.167511	0.555712	657	-0.0253438	0.0178127	0.155278	0.559537	657	-0.0250374	0.0178358	0.160868	0.519394
C22:5 n6	734	-0.0315394	0.0218012	0.148414	0.472385	690	-0.037512	0.0228845	0.101636	0.472442	675	-0.0385339	0.0231047	0.0958275	0.473882	675	-0.0315278	0.0225915	0.163315	0.519394
C22:5 n3	731	0.00618624	0.0277591	0.823711	0.978157	687	-0.0139236	0.0278329	0.617057	0.877312	672	-0.0182525	0.0281981	0.517666	0.803676	672	-0.0217616	0.02813	0.439438	0.756715
C22:6 n3	734	-0.0149033	0.0167796	0.374736	0.731961	690	-0.0253149	0.0170601	0.138307	0.525568	675	-0.0265237	0.0172719	0.125099	0.517096	675	-0.0288724	0.0172285	0.0942384	0.430929
AC C10:0	673	-0.0568001	0.0274838	0.0391562	0.259901	635	-0.0445491	0.028972	0.12465	0.500996	621	-0.0386435	0.0294413	0.189837	0.590207	621	-0.0410354	0.0294498	0.164019	0.519394
AC C10:1	650	-0.0835881	0.0269264	0.00199215	0.104533	616	-0.0750151	0.0281548	0.00792284	0.275979	602	-0.0729965	0.0287321	0.0113273	0.338201	602	-0.0754017	0.0287437	0.00894042	0.266935
AC C12:0	682	-0.057959	0.0278676	0.0379264	0.259901	644	-0.0571631	0.0288618	0.048079	0.399968	631	-0.0540441	0.0293207	0.0657869	0.395195	631	-0.056885	0.0292391	0.052176	0.316264
AC C14:1	733	-0.0236658	0.0245745	0.33586	0.701948	691	-0.0156552	0.0257704	0.543735	0.829493	676	-0.0149702	0.0261386	0.567031	0.828737	676	-0.0170815	0.0261223	0.513404	0.787062
AC C16:0	738	0.0367609	0.0284111	0.196118	0.559859	693	0.0423016	0.0295697	0.153021	0.542056	678	0.0514427	0.0298401	0.0851925	0.459506	678	0.0514807	0.0298984	0.0855715	0.415918
AC C18:1	693	0.0574104	0.0309498	0.0640388	0.320629	655	0.0651924	0.0311328	0.0366576	0.36439	642	0.0722024	0.0309232	0.0198692	0.346055	642	0.0709007	0.0309605	0.0223568	0.316264
AC C2:0	735	-0.0438892	0.0215904	0.0424392	0.259901	690	-0.0381669	0.022692	0.0930477	0.472442	675	-0.035274	0.0231182	0.127544	0.517096	675	-0.0382313	0.0230309	0.0973987	0.430929
AC C3:0	737	-0.0305383	0.0245042	0.213079	0.559859	692	-0.0362873	0.0253405	0.152615	0.542056	677	-0.0318694	0.0255308	0.212382	0.59596	677	-0.0323562	0.0255766	0.206299	0.582637
AC C8:1	736	-0.0565653	0.0377279	0.134236	0.445323	692	-0.0443705	0.0400916	0.26881	0.653271	677	-0.0350371	0.0403026	0.384976	0.751962	677	-0.0394064	0.0402194	0.327557	0.664652
H1	719	-0.169231	0.0653181	0.00977247	0.170204	674	-0.186148	0.0675602	0.00602862	0.275441	659	-0.208981	0.0687685	0.00247239	0.251305	659	-0.205923	0.0687947	0.00286775	0.215554
LPCa C14:0	736	0.00191091	0.0203052	0.925049	0.998579	692	0.00605542	0.021043	0.773617	0.929229	677	0.00789136	0.0213267	0.711486	0.912273	677	0.013167	0.020849	0.527908	0.788091
LPCa C16:0	737	-0.00724377	0.0161669	0.654244	0.91158	692	-0.00267373	0.0167491	0.873218	0.954885	677	0.000371768	0.0170597	0.98262	0.99583	677	0.00426989	0.0168063	0.799526	0.94351
LPCa C16:1	737	0.000908338	0.0210558	0.965602	0.998677	692	0.00673297	0.0214792	0.754026	0.917565	677	0.011968	0.0219011	0.584938	0.837918	677	0.0218281	0.0204524	0.286248	0.661652
LPCa C18:0	738	-0.00166611	0.0190444	0.93031	0.998579	693	0.00175004	0.0199351	0.930072	0.971925	678	0.00100124	0.020272	0.960623	0.981732	678	0.00300139	0.0202474	0.882202	0.94351
LPCa C18:1	739	-0.0345347	0.0191452	0.0716741	0.320629	694	-0.0236287	0.0194368	0.224541	0.60384	679	-0.0199309	0.0197673	0.313696	0.690131	679	-0.0118138	0.0186424	0.526494	0.788091
LPCa C18:2	736	-0.0522628	0.0219903	0.0177329	0.178758	691	-0.0371857	0.0224795	0.0985563	0.472442	676	-0.0409548	0.0229127	0.0743342	0.422423	676	-0.0345708	0.0222936	0.121461	0.497751
LPCa C18:3	604	0.000778479	0.0357781	0.982648	0.998677	576	0.0234541	0.0370379	0.526833	0.82626	564	0.0222673	0.037577	0.553712	0.828737	564	0.0329449	0.0369617	0.373151	0.713443
LPCa C20:3	736	-0.0248342	0.0237311	0.295689	0.660902	691	-0.00897512	0.0241975	0.710821	0.909845	676	-0.00675959	0.0247384	0.784754	0.938307	676	0.00198144	0.0236255	0.933187	0.980081
LPCa C20:4	735	-0.0714356	0.0213687	0.000871794	0.0911025	690	-0.0517186	0.0216019	0.0169343	0.315098	675	-0.0522403	0.0220538	0.0181398	0.346055	675	-0.0464094	0.0215459	0.0316103	0.316264
LPCa C22:6	668	-0.0440173	0.0244235	0.0719669	0.320629	629	-0.033798	0.0255382	0.186192	0.57578	616	-0.0328966	0.0258727	0.204058	0.590207	616	-0.0272749	0.0256634	0.28831	0.661652
LPCe C16:0	692	0.024033	0.025798	0.351885	0.707153	654	0.0146003	0.0267116	0.584854	0.849339	641	0.0227892	0.0269504	0.398106	0.763341	641	0.0273346	0.0267945	0.308057	0.661652
LPCe C18:0	733	-0.00460277	0.0260171	0.859627	0.998579	688	-0.0146913	0.0267804	0.583476	0.849339	673	-0.0156791	0.0267673	0.558245	0.828737	673	-0.0155855	0.0268107	0.561232	0.797942
LPCe C18:1	411	-0.00909971	0.0360058	0.800607	0.975131	389	-0.0211758	0.0379515	0.577202	0.849339	383	-0.00824169	0.0381396	0.829037	0.946321	383	-0.0011257	0.0379603	0.976359	0.990578
PCa C28:2	560	-0.0278782	0.0372308	0.454303	0.748647	531	-0.0283472	0.039575	0.47414	0.791047	521	-0.0284597	0.0397945	0.474841	0.793462	521	-0.0307215	0.0399027	0.441719	0.756715
PCa C30:0	737	-0.0285255	0.0237771	0.23065	0.57649	692	-0.0225163	0.0248867	0.365923	0.735365	677	-0.0261225	0.0253325	0.302838	0.680571	677	-0.0260468	0.0253818	0.30518	0.661652
PCa C30:2	700	-0.0215562	0.0230361	0.349729	0.707153	660	-0.0114725	0.0240092	0.63293	0.877342	645	-0.0112732	0.0243602	0.643693	0.86517	645	-0.0120806	0.024397	0.620658	0.836888
PCa C32:0	739	-0.0280645	0.020461	0.170611	0.516777	694	-0.0167772	0.0212341	0.429746	0.742289	679	-0.0185456	0.0216987	0.393038	0.760601	679	-0.0203559	0.0216888	0.348312	0.691787
PCa C32:1	737	-0.0260414	0.0266708	0.329194	0.694965	692	-0.0237785	0.0275767	0.388849	0.739274	677	-0.0201789	0.0280358	0.471934	0.793462	677	-0.0162483	0.0278997	0.560511	0.797942
PCa C32:2	733	-0.0163345	0.0216204	0.450189	0.748647	688	-0.00716813	0.0229735	0.755125	0.917565	673	-0.00820551	0.0234158	0.726133	0.92461	673	-0.00723277	0.0234392	0.757744	0.920747
PCa C32:3	727	-0.00841756	0.0221343	0.703841	0.929839	683	0.00336132	0.0229401	0.883551	0.955362	668	0.00202587	0.0233845	0.93099	0.981732	668	0.00431351	0.0233363	0.853412	0.94351
PCa C34:1	738	-0.0230578	0.0183451	0.209199	0.559859	693	-0.0185858	0.0189564	0.327218	0.712382	678	-0.0154699	0.0193245	0.423693	0.787966	678	-0.0142232	0.0193359	0.462251	0.766244
PCa C34:2	736	-0.0480074	0.0202686	0.0181212	0.178758	691	-0.0402837	0.0213595	0.0597314	0.445694	676	-0.0418773	0.0218502	0.0557317	0.388359	676	-0.0433587	0.0218611	0.0477472	0.316264
PCa C34:3	738	-0.0341353	0.021627	0.114922	0.407096	693	-0.029984	0.0228902	0.190678	0.57578	678	-0.031343	0.0233087	0.179194	0.590207	678	-0.0304506	0.023343	0.19253	0.582637
PCa C34:4	736	-0.00225783	0.0244044	0.926313	0.998579	692	-0.00537644	0.0258406	0.835244	0.947722	677	-0.00594016	0.0260863	0.819941	0.946321	677	-0.00454918	0.0261093	0.861735	0.94351
PCa C34:5	493	-0.00358446	0.0472837	0.939604	0.998579	465	0.0114495	0.0498506	0.818449	0.947722	455	0.0209331	0.0506097	0.679358	0.890219	455	0.0208734	0.0506693	0.680578	0.874179
PCa C36:1	736	-0.0111451	0.0185704	0.548592	0.817019	691	-0.00860688	0.0192616	0.655135	0.877342	676	-0.00613793	0.0195535	0.753694	0.929499	676	-0.00471968	0.0195578	0.809384	0.94351
PCa C36:2	735	-0.0352437	0.019322	0.0685655	0.320629	690	-0.0284239	0.0203243	0.162424	0.551811	675	-0.0293407	0.0207919	0.158678	0.562095	675	-0.0301029	0.020824	0.148777	0.519394
PCa C36:3	736	0.000367245	0.0196903	0.985125	0.998677	691	0.00912323	0.0203589	0.654212	0.877342	676	0.011982	0.0207965	0.564711	0.828737	676	0.0153974	0.0206569	0.456308	0.765324
PCa C36:4	737	-0.0445976	0.0181503	0.0142405	0.178758	692	-0.0341735	0.0187485	0.068792	0.449298	677	-0.0316972	0.0190451	0.0965293	0.473882	677	-0.0324794	0.0190717	0.0890439	0.422958
PCa C36:5	738	0.00439012	0.0233748	0.851075	0.998579	693	0.00413629	0.0243424	0.865124	0.954885	678	0.005251	0.0246739	0.831537	0.946321	678	0.00108152	0.0244914	0.964791	0.983616
PCa C36:6	673	-0.00500691	0.0342958	0.883972	0.998579	629	-0.00797751	0.0358944	0.824195	0.947722	619	-0.000135024	0.0360792	0.997015	0.997015	619	-0.00199289	0.036127	0.956027	0.983616
PCa C38:0	733	-0.0185721	0.0238424	0.436265	0.742018	689	-0.021793	0.0248778	0.381346	0.739274	674	-0.0197934	0.0252714	0.433778	0.787966	674	-0.0219123	0.0252625	0.386054	0.720405
PCa C38:2	612	-0.0248111	0.0318778	0.43669	0.742018	579	-0.0281373	0.0333856	0.399703	0.739274	568	-0.0218557	0.0337562	0.517609	0.803676	568	-0.0225679	0.0338229	0.504905	0.787062
PCa C38:3	736	-0.0139395	0.0186446	0.45492	0.748647	691	-0.00907405	0.0191931	0.636528	0.877342	676	-0.00596514	0.0195608	0.760499	0.929499	676	-0.00391402	0.0195467	0.841356	0.94351
PCa C38:4	737	-0.0519499	0.0177644	0.00356	0.104533	692	-0.0415125	0.0183334	0.0238755	0.315098	677	-0.0398779	0.0185874	0.0322883	0.361499	677	-0.0415591	0.0185707	0.0255667	0.316264
PCa C38:5	734	-0.0317824	0.0173761	0.0678021	0.320629	689	-0.0279188	0.0179848	0.121055	0.500996	674	-0.0231595	0.0181549	0.202534	0.590207	674	-0.0227272	0.018186	0.211858	0.582637
PCa C38:6	735	-0.0388594	0.0201218	0.0538507	0.288584	690	-0.0437124	0.0207668	0.0356735	0.36439	676	-0.0436721	0.0210707	0.0385991	0.373733	676	-0.0457938	0.0210248	0.0297596	0.316264
PCa C40:0	572	-0.0230781	0.0323634	0.476087	0.76039	537	-0.0210607	0.0334932	0.529755	0.82626	527	-0.0244723	0.0336954	0.468003	0.793462	527	-0.0269118	0.0337622	0.42577	0.756715
PCa C40:4	698	-0.0610446	0.0218157	0.00528421	0.104533	659	-0.0583789	0.0228313	0.0107903	0.315098	646	-0.0553635	0.0231435	0.0170452	0.346055	646	-0.0549009	0.023184	0.0181881	0.316264
PCa C40:5	738	-0.0602344	0.025583	0.0188166	0.178758	693	-0.0667195	0.0268626	0.0132454	0.315098	678	-0.0642015	0.0271435	0.0183094	0.346055	678	-0.0610113	0.0270707	0.0245425	0.316264
PCa C40:6	737	-0.0285982	0.0230088	0.2143	0.559859	692	-0.0371362	0.0235946	0.115978	0.49468	678	-0.0376221	0.0239087	0.116073	0.514262	678	-0.0397899	0.0238872	0.0962462	0.430929
PCa C42:0	493	-0.0679503	0.0326623	0.0380197	0.259901	466	-0.0775567	0.0336752	0.0217334	0.315098	456	-0.0759237	0.0344513	0.0280628	0.361499	456	-0.0780657	0.0343724	0.0236264	0.316264
PCa C42:1	385	-0.120958	0.0332434	0.000312686	0.0653514	365	-0.10886	0.0342877	0.00163304	0.275441	357	-0.103781	0.0349513	0.00319856	0.251305	357	-0.10537	0.0346163	0.00251931	0.215554
PCa C42:5	385	-0.0799848	0.0345722	0.0212336	0.192949	364	-0.0765474	0.0368199	0.0383568	0.36439	357	-0.0754573	0.0372782	0.0437413	0.373733	357	-0.0760163	0.0371218	0.0413613	0.316264
PCa C43:6	689	-0.0651144	0.0262431	0.0133376	0.178758	652	-0.0618564	0.0273622	0.0241223	0.315098	640	-0.0595273	0.027835	0.0328636	0.361499	640	-0.0613186	0.0278466	0.028036	0.316264
PCa C44:12	690	-0.011052	0.0265088	0.676871	0.923885	651	-0.0126556	0.0276598	0.647437	0.877342	638	-0.0076661	0.0281774	0.785664	0.938307	638	-0.00771856	0.0282302	0.784627	0.937068
PCe C32:0	739	-0.0170982	0.0211132	0.418302	0.742018	694	-0.0131705	0.0222447	0.554002	0.835708	679	-0.0164053	0.0226504	0.469151	0.793462	679	-0.0152566	0.0226738	0.501265	0.787062
PCe C32:1	739	-0.0306018	0.0209286	0.144123	0.470651	694	-0.0266367	0.0219691	0.225764	0.60384	679	-0.0276979	0.0223423	0.215531	0.59596	679	-0.0278035	0.0223847	0.214656	0.582637
PCe C32:2	700	-0.00326667	0.0275721	0.905724	0.998579	660	0.00112523	0.0288087	0.968856	0.973514	645	0.00198094	0.029033	0.945624	0.981732	645	0.000367932	0.029064	0.989904	0.994663
PCe C34:0	739	-0.00390698	0.0263867	0.882332	0.998579	694	-0.0100541	0.0273345	0.713126	0.909845	679	-0.00576093	0.0275775	0.834592	0.946321	679	-0.00679678	0.0276168	0.805674	0.94351
PCe C34:1	737	-0.0212365	0.019902	0.286307	0.653135	692	-0.016955	0.020956	0.418761	0.742289	677	-0.0142756	0.0212755	0.502467	0.803676	677	-0.012854	0.0212831	0.546087	0.797942
PCe C34:2	737	-0.0409097	0.0193421	0.0347684	0.259901	692	-0.0331521	0.020489	0.106126	0.472442	677	-0.0341527	0.020858	0.102032	0.473882	677	-0.0345259	0.0208964	0.0989694	0.430929
PCe C34:3	737	-0.0415929	0.0237243	0.0799979	0.341216	692	-0.035103	0.0251557	0.163351	0.551811	677	-0.03987	0.0254787	0.118108	0.514262	677	-0.0438455	0.0253247	0.0838681	0.415918
PCe C34:4	623	-0.0560102	0.0448859	0.212573	0.559859	585	-0.0533727	0.0467977	0.254565	0.633381	572	-0.0469678	0.047803	0.326274	0.696832	572	-0.0472748	0.0479128	0.324235	0.664652
PCe C36:0	590	-0.0239091	0.0291168	0.411903	0.742018	554	-0.0239533	0.0306173	0.434359	0.744107	543	-0.0200374	0.031059	0.519121	0.803676	543	-0.0200486	0.0311185	0.519687	0.787062
PCe C36:1	737	-0.00876575	0.0224963	0.696909	0.929839	692	-0.0134591	0.0235142	0.567256	0.846832	677	-0.0128672	0.0238261	0.589349	0.837918	677	-0.0140515	0.0238533	0.556012	0.797942
PCe C36:2	736	-0.0255171	0.0215508	0.236787	0.582217	691	-0.0283604	0.0226372	0.210709	0.587176	676	-0.0272723	0.0228223	0.232529	0.607482	676	-0.0291321	0.0228166	0.202132	0.582637
PCe C36:3	735	4.26474e-05	0.0207084	0.998357	0.998677	690	0.0030101	0.0218048	0.890245	0.955362	675	0.00111085	0.0222284	0.960158	0.981732	675	0.00348714	0.022196	0.875209	0.94351
PCe C36:4	737	-0.030805	0.0188205	0.102114	0.402678	692	-0.0207001	0.0197922	0.295998	0.676455	677	-0.0220098	0.0200498	0.272717	0.653583	677	-0.0209415	0.0200703	0.297147	0.661652
PCe C36:5	737	-0.0395292	0.02028	0.0516633	0.284148	692	-0.0268699	0.0211523	0.204418	0.583085	677	-0.027411	0.0215442	0.203715	0.590207	677	-0.0292418	0.0215352	0.17498	0.537806
PCe C36:6	412	-0.139886	0.0834089	0.0943049	0.386465	388	-0.129106	0.087702	0.14185	0.529404	383	-0.12942	0.0890052	0.146794	0.538245	383	-0.130056	0.0892649	0.145997	0.519394
PCe C38:0	734	-0.00834811	0.0260659	0.748858	0.944702	689	-0.0103969	0.0270351	0.700679	0.909577	674	-0.00425706	0.0274095	0.876623	0.956702	674	-0.00968331	0.0270704	0.720678	0.902162
PCe C38:2	726	-0.0125194	0.035918	0.727528	0.934368	681	-0.0198841	0.03681	0.589255	0.849339	666	-0.0177788	0.0373479	0.634215	0.86517	666	-0.0190028	0.0373991	0.611553	0.833717
PCe C38:3	730	0.0187416	0.0268669	0.485672	0.768981	685	0.0189521	0.0278906	0.497049	0.804746	670	0.0215378	0.0283684	0.448001	0.793462	670	0.0185766	0.0283417	0.512411	0.787062
PCe C38:4	736	-0.039173	0.0177774	0.0278743	0.233029	691	-0.0343829	0.0186791	0.0661076	0.445694	676	-0.0345912	0.0187966	0.0661811	0.395195	676	-0.0354402	0.0188205	0.0601395	0.345428
PCe C38:5	736	-0.0356567	0.0187128	0.0571176	0.29844	691	-0.024893	0.0196842	0.206451	0.583085	676	-0.022726	0.0199735	0.255622	0.640103	676	-0.0224435	0.0200112	0.262469	0.640429
PCe C38:6	737	-0.0288942	0.0202024	0.153083	0.477528	692	-0.0204248	0.0212393	0.336574	0.714366	677	-0.0205288	0.0215068	0.340173	0.703922	677	-0.0224197	0.0214942	0.297309	0.661652
PCe C40:0	734	-0.00465582	0.0190676	0.807166	0.975131	690	-0.00415581	0.0198315	0.834079	0.947722	676	-0.00496876	0.0201288	0.805104	0.946321	676	-0.00706683	0.0200938	0.725183	0.902162
PCe C40:1	633	0.0258892	0.031793	0.415784	0.742018	595	0.0358826	0.0334824	0.284312	0.676455	585	0.037105	0.0339712	0.275193	0.653583	585	0.0384101	0.0340584	0.2599	0.640429
PCe C40:3	571	0.0399767	0.0399695	0.317659	0.688656	534	0.0350379	0.0413552	0.397255	0.739274	524	0.0435742	0.0414691	0.293876	0.680571	524	0.0404113	0.0415079	0.330736	0.664652
PCe C40:4	731	-0.0252951	0.0225069	0.261442	0.626225	686	-0.0314108	0.02336	0.179201	0.567471	672	-0.030808	0.0235929	0.19208	0.590207	672	-0.0334486	0.0235339	0.155715	0.519394
PCe C40:5	732	-0.0298138	0.0249068	0.231699	0.57649	687	-0.0205912	0.0256363	0.422144	0.742289	672	-0.0164914	0.0260324	0.526635	0.809315	672	-0.0193138	0.0259931	0.457729	0.765324
PCe C40:6	735	-0.030174	0.0215575	0.162036	0.498023	690	-0.0407239	0.0220349	0.0650237	0.445694	675	-0.0366409	0.0220784	0.0974819	0.473882	675	-0.0403574	0.0218865	0.0656493	0.361071
PCe C42:1	406	-0.0874187	0.0414065	0.0353816	0.259901	382	-0.0948407	0.043778	0.0309309	0.359142	374	-0.0913632	0.0433973	0.0359734	0.373733	374	-0.0914143	0.0433531	0.0356855	0.316264
PCe C42:2	581	-0.0204864	0.0382786	0.592728	0.860278	547	-0.0378816	0.0402329	0.346852	0.714366	536	-0.0303131	0.040792	0.457754	0.793462	536	-0.0324071	0.0408621	0.428096	0.756715
PCe C42:3	492	-0.002293	0.0393682	0.953578	0.998677	465	0.00559669	0.0410341	0.891574	0.955362	456	0.00908103	0.0415486	0.827092	0.946321	456	0.0066247	0.0415814	0.873492	0.94351
PCe C42:4	673	-0.0349552	0.026429	0.186426	0.548776	634	-0.03156	0.0275413	0.252279	0.633381	624	-0.0290245	0.0280257	0.30079	0.680571	624	-0.0315038	0.0279744	0.260548	0.640429
PCe C42:5	639	0.00696089	0.0275515	0.800622	0.975131	601	0.00140532	0.0282823	0.960387	0.973514	591	0.00185687	0.0287807	0.948581	0.981732	591	0.00010026	0.0288324	0.997227	0.997227
PCe C42:6	665	-0.0317635	0.0275528	0.249408	0.60612	627	-0.0326456	0.0283787	0.250454	0.633381	612	-0.032789	0.028915	0.257266	0.640103	612	-0.0338386	0.0287439	0.239575	0.62589
SMa C30:1	586	-0.0145724	0.0354007	0.680757	0.923885	550	-0.00206095	0.0368902	0.955469	0.973514	539	-0.00034921	0.037295	0.992533	0.997015	539	-0.00215599	0.0373171	0.95395	0.983616
SMa C32:1	738	-0.00698842	0.0186878	0.708547	0.929839	693	-0.00413091	0.0195874	0.833032	0.947722	678	-0.00684021	0.0199265	0.731504	0.92461	678	-0.00649834	0.0199634	0.744898	0.910431
SMa C32:2	737	-0.00773799	0.0236131	0.743235	0.944702	692	0.00187747	0.0244833	0.938898	0.972204	677	0.00123417	0.024916	0.96051	0.981732	677	0.00393497	0.0248558	0.87426	0.94351
SMa C33:1	737	-0.00676804	0.0186726	0.717116	0.930915	692	-0.00487549	0.0196981	0.804589	0.947722	677	-0.00780822	0.0198966	0.694862	0.899623	677	-0.00813185	0.0199339	0.683451	0.874179
SMa C34:0	730	0.00169765	0.01786	0.9243	0.998579	686	0.00830297	0.0184787	0.653343	0.877342	671	0.0077473	0.0188686	0.681507	0.890219	671	0.0085459	0.018888	0.651096	0.86126
SMa C34:1	737	-0.0127941	0.0154297	0.407277	0.742018	692	-0.00517297	0.0162189	0.749867	0.917565	677	-0.00644143	0.0165539	0.697316	0.899623	677	-0.00699443	0.0165801	0.673269	0.874179
SMa C34:2	739	-0.0291952	0.0184357	0.113718	0.407096	694	-0.0201604	0.0193236	0.297185	0.676455	679	-0.0229382	0.0197036	0.244785	0.623904	679	-0.0217287	0.019716	0.270832	0.648084
SMa C35:1	737	-0.0163315	0.0194096	0.400396	0.740556	692	-0.0146379	0.0204656	0.474708	0.791047	677	-0.0192481	0.0206827	0.352388	0.722049	677	-0.0202093	0.0207021	0.32933	0.664652
SMa C36:0	500	-0.00411997	0.0230858	0.858433	0.998579	475	0.0100785	0.0231145	0.663023	0.877342	467	0.0115237	0.0233003	0.621143	0.86517	467	0.0137157	0.0232853	0.556141	0.797942
SMa C36:1	738	-0.0185527	0.0165853	0.263674	0.626225	693	-0.00827382	0.0172558	0.631753	0.877342	678	-0.00879309	0.0176333	0.618185	0.86517	678	-0.00833143	0.017662	0.637288	0.848365
SMa C36:2	739	-0.0186198	0.0188236	0.32291	0.688656	694	-0.00659036	0.0193497	0.733518	0.914684	679	-0.00910189	0.0197618	0.645253	0.86517	679	-0.00800096	0.0197786	0.685959	0.874179
SMa C36:3	671	-0.0329766	0.027164	0.225192	0.57649	636	-0.0264922	0.028446	0.352056	0.714366	623	-0.026319	0.0289779	0.364116	0.730494	623	-0.0257711	0.0290579	0.375496	0.713443
SMa C38:1	618	0.00145742	0.0197653	0.941245	0.998579	580	0.00618542	0.0207459	0.765699	0.925035	570	0.0100607	0.0210841	0.63343	0.86517	570	0.0111408	0.0211198	0.598058	0.827732
SMa C38:2	737	-0.038115	0.0188048	0.0430434	0.259901	692	-0.0291632	0.0195884	0.137014	0.525568	677	-0.0298762	0.0200211	0.136123	0.517266	677	-0.0295137	0.020058	0.141663	0.519394
SMa C38:3	724	-0.0527068	0.0259613	0.0427096	0.259901	681	-0.0563769	0.0269952	0.0371459	0.36439	666	-0.0601676	0.027293	0.0278436	0.361499	666	-0.0606512	0.0273477	0.0269206	0.316264
SMa C39:1	734	-0.00318192	0.0229269	0.889658	0.998579	689	-0.0080399	0.023766	0.735248	0.914684	674	-0.00741447	0.0239497	0.756976	0.929499	674	-0.00917389	0.0239514	0.70183	0.888985
SMa C40:1	677	-0.013394	0.0188072	0.476608	0.76039	634	-0.00401933	0.0197611	0.838893	0.947722	622	-0.00322551	0.0201056	0.872598	0.956702	622	-0.00234179	0.0201157	0.907362	0.957771
SMa C40:2	738	-0.0309126	0.0192975	0.109616	0.407096	693	-0.0215789	0.0201699	0.285071	0.676455	678	-0.0199892	0.0204879	0.329595	0.696832	678	-0.0201493	0.0205274	0.326672	0.664652
SMa C40:3	451	-0.0403524	0.0320404	0.208547	0.559859	423	-0.0227625	0.0337615	0.50056	0.804746	415	-0.0185635	0.0340028	0.585415	0.837918	415	-0.0177999	0.0341016	0.601987	0.827732
SMa C40:4	728	-0.046216	0.0195048	0.0180797	0.178758	684	-0.035466	0.0201078	0.07823	0.45185	669	-0.0317173	0.0204093	0.120662	0.514659	669	-0.0322536	0.0204404	0.115074	0.481008
SMa C40:5	664	0.00749592	0.0270052	0.781428	0.972134	625	0.00596215	0.028045	0.831717	0.947722	612	0.00375581	0.0284154	0.894891	0.964084	612	-0.00154493	0.0282746	0.956444	0.983616
SMa C41:1	736	0.0138752	0.021572	0.520296	0.796418	691	0.0158189	0.0225145	0.482545	0.791047	676	0.0137628	0.0228911	0.547896	0.828737	676	0.0124754	0.0229144	0.586329	0.816952
SMa C41:2	736	-0.00862876	0.0227091	0.704081	0.929839	692	-0.0110005	0.0238538	0.644832	0.877342	677	-0.0110714	0.0240758	0.645773	0.86517	677	-0.0121531	0.0241054	0.614318	0.833717
SMa C42:1	738	0.0154652	0.0172912	0.37141	0.731961	693	0.0184033	0.0183869	0.317242	0.705357	678	0.0151698	0.0186889	0.417259	0.785651	678	0.0146235	0.0187182	0.434943	0.756715
SMa C42:2	735	-0.00744561	0.0172948	0.666952	0.922238	690	0.00489682	0.0181976	0.787942	0.935681	675	0.00585387	0.0185706	0.752695	0.929499	675	0.00549027	0.0186053	0.768019	0.922505
SMa C42:3	739	-0.0288951	0.0217383	0.184194	0.548776	694	-0.0181907	0.0228519	0.426301	0.742289	679	-0.0149495	0.0231394	0.518466	0.803676	679	-0.0141754	0.0231747	0.540967	0.797942
SMa C42:4	481	-0.0583728	0.0244959	0.0175712	0.178758	455	-0.0445169	0.0250101	0.07578	0.45185	447	-0.0451305	0.0252667	0.074783	0.422423	447	-0.0502491	0.025173	0.0465545	0.316264
SMa C42:5	434	-0.111693	0.0388912	0.00428497	0.104533	410	-0.12228	0.0406877	0.00282347	0.275441	404	-0.115933	0.0411058	0.00504602	0.251305	404	-0.117123	0.0412614	0.0047732	0.215554
SMa C42:6	727	-0.0379895	0.0212455	0.0741837	0.323008	683	-0.041426	0.0220869	0.0611541	0.445694	669	-0.0425597	0.0223827	0.0576888	0.388359	669	-0.0442236	0.0223749	0.0485281	0.316264
SMa C43:2	689	-0.00549745	0.0246561	0.82363	0.978157	650	-0.00851499	0.0260666	0.744032	0.917565	637	-0.00783702	0.0263091	0.765895	0.930651	637	-0.00858137	0.0263569	0.744851	0.910431
SMa C44:6	435	-0.0388531	0.0375884	0.301891	0.664161	416	-0.0366065	0.0390982	0.349702	0.714366	411	-0.0220764	0.0393631	0.575228	0.834879	411	-0.0293937	0.0394015	0.456114	0.765324
SMa C21:2	470	-0.147714	0.0527154	0.00529228	0.104533	444	-0.149558	0.0532453	0.00520138	0.275441	436	-0.148826	0.0537664	0.00589253	0.251305	436	-0.148064	0.0538073	0.00618814	0.215554
SMa C31:1	401	-0.0457723	0.0495095	0.35579	0.708192	377	-0.0534731	0.0516264	0.301006	0.676455	371	-0.0571934	0.0528681	0.280078	0.657711	371	-0.057772	0.0530512	0.27691	0.650271
SMa C35:2	644	-0.0281276	0.0269623	0.297248	0.660902	601	-0.0385718	0.0285383	0.177038	0.567471	588	-0.0369775	0.0290585	0.203714	0.590207	588	-0.0365863	0.0291186	0.209472	0.582637
SMa C37:2	436	-0.0263948	0.0335199	0.431464	0.742018	416	-0.0189351	0.034781	0.586464	0.849339	410	-0.0167364	0.0352431	0.635136	0.86517	410	-0.0153603	0.035377	0.664393	0.873322
SMa C37:3	708	-0.0674042	0.0333962	0.0439441	0.259901	665	-0.0714107	0.0350226	0.0418607	0.380386	651	-0.0704686	0.0355993	0.0481985	0.3874	651	-0.0706046	0.0356475	0.0480711	0.316264
SMa C39:4	516	-0.0511245	0.0316505	0.106877	0.406133	485	-0.0315813	0.0329778	0.338735	0.714366	478	-0.0260689	0.0335345	0.43734	0.787966	478	-0.0281787	0.033564	0.4016	0.723572
SMa C39:5	684	-0.0531673	0.0264551	0.0448625	0.259901	646	-0.0448383	0.0278973	0.108503	0.472442	633	-0.0427441	0.0284222	0.133127	0.517266	633	-0.0434022	0.0284687	0.12789	0.504322
SMa C41:5	558	-0.0537033	0.0324674	0.0986902	0.396659	526	-0.0358666	0.0345424	0.29961	0.676455	519	-0.0201026	0.0348609	0.564437	0.828737	519	-0.0197186	0.0349744	0.573145	0.809374
SMa C43:0	350	-0.0669276	0.0331874	0.0445173	0.259901	331	-0.0600384	0.0353583	0.0904989	0.472442	326	-0.0539022	0.0359129	0.134406	0.517266	326	-0.0625	0.0356665	0.0807158	0.415918

## Sheet: Factor3
	Crude model					Main model					Main model +					Main model ++
	Not Adjusted					Adjusted for city, sex, gestational age, smoking, materanl education, maternal age					Main model, further adjusted for maternal BMI, and maternal gestational weight gain					Main model +, further adjusted for birth weight
Metabolite	n	beta	se	p	p_fdr	n	beta	se	p	p_fdr	n	beta	se	p	p_fdr	n	beta	se	p	p_fdr
Ala	736	-0.00841546	0.0154966	0.587264	0.96684	691	-0.00730429	0.0156678	0.641227	0.971134	676	-0.00675117	0.0157278	0.667883	0.998613	676	-0.00750388	0.0156823	0.63246	0.995866
Arg	737	-0.00550814	0.0295511	0.852189	0.973265	692	0.00688221	0.0295368	0.815829	0.987917	677	0.00724704	0.0298776	0.808425	0.998613	677	0.0084649	0.0298197	0.776601	0.995866
Asn	736	-0.00748469	0.016751	0.65514	0.96684	691	-0.0146274	0.0165643	0.377518	0.917515	676	-0.0143337	0.0167013	0.39108	0.994624	676	-0.0145362	0.0167119	0.384726	0.995635
Asp	734	-0.0458892	0.0258367	0.0761367	0.795628	689	-0.0543959	0.0251635	0.0309978	0.68515	674	-0.0549252	0.0254464	0.0312588	0.863201	674	-0.0555277	0.0254445	0.0294465	0.777991
Cit	729	-0.0198279	0.0185677	0.28594	0.96684	684	-0.0186024	0.0190953	0.330322	0.917515	670	-0.0182776	0.0191314	0.339749	0.994624	670	-0.0179568	0.0191439	0.348602	0.995635
Gln	715	-0.00117585	0.024424	0.961616	0.979156	674	0.00263449	0.024777	0.915355	0.987917	660	0.00283046	0.0245523	0.908257	0.998613	660	0.00279147	0.0245776	0.909609	0.995866
Glu	671	-0.0176527	0.0171626	0.304069	0.96684	629	-0.0250604	0.0175836	0.154612	0.917515	616	-0.0232108	0.0175751	0.187126	0.994624	616	-0.0232786	0.0175951	0.186342	0.995635
Gly	738	-0.0048385	0.0149382	0.746106	0.96684	693	-0.00930025	0.0149684	0.534598	0.917515	678	-0.00872882	0.0150689	0.562613	0.997458	678	-0.0087154	0.015084	0.563605	0.995635
His	737	0.00631149	0.0139483	0.651052	0.96684	692	0.00155459	0.0142234	0.912998	0.987917	677	0.00409147	0.0142133	0.773544	0.998613	677	0.00518727	0.0140971	0.713018	0.995866
Ile	735	-0.00491018	0.0126443	0.697887	0.96684	690	-0.00813213	0.013124	0.535708	0.917515	675	-0.00861498	0.0131923	0.513968	0.994624	675	-0.0082405	0.0131864	0.53224	0.995635
Leu	736	-0.00432433	0.0125445	0.730406	0.96684	691	-0.00430646	0.0128079	0.7368	0.987917	676	-0.0053186	0.0128966	0.680179	0.998613	676	-0.00530364	0.0129093	0.681327	0.995866
Lys	610	-0.0113339	0.0136447	0.406509	0.96684	573	-0.0212967	0.0137858	0.122961	0.917515	560	-0.020181	0.0138553	0.145825	0.991914	560	-0.0202419	0.0138721	0.1451	0.981647
Met	736	-0.015673	0.0147845	0.289456	0.96684	691	-0.01925	0.01473	0.191712	0.917515	676	-0.019019	0.0148185	0.199787	0.994624	676	-0.0192788	0.0148253	0.193928	0.995635
Orn	736	-0.0234123	0.0193461	0.226607	0.96684	691	-0.0348485	0.0184292	0.0590667	0.748146	676	-0.0347101	0.0185813	0.062211	0.896184	676	-0.0348638	0.0185974	0.0612885	0.863987
Phe	738	-0.0100718	0.0118999	0.397624	0.96684	693	-0.0102776	0.0118886	0.387629	0.917515	678	-0.0116716	0.011986	0.330534	0.994624	678	-0.0119231	0.0119894	0.320363	0.995635
Pro	737	-0.0099619	0.013048	0.445427	0.96684	692	-0.0130061	0.0133439	0.330072	0.917515	677	-0.0110267	0.0134522	0.412692	0.994624	677	-0.0110749	0.0134653	0.411107	0.995635
Trp	733	-0.0179169	0.0115912	0.12261	0.854183	688	-0.0203502	0.0120205	0.0909334	0.766126	673	-0.0208261	0.0121194	0.0862008	0.896184	673	-0.0206255	0.012128	0.0894899	0.87366
Ser	736	-0.00855793	0.0165446	0.605131	0.96684	691	-0.0146136	0.0163583	0.371996	0.917515	676	-0.0141613	0.0165566	0.392686	0.994624	676	-0.0142784	0.0165715	0.389215	0.995635
Thr	736	-0.023023	0.0144707	0.112048	0.854183	691	-0.0316645	0.0149229	0.0342174	0.68515	676	-0.0278004	0.0148233	0.0611794	0.896184	676	-0.0273997	0.0148203	0.064943	0.863987
Tyr	735	-0.00586293	0.012018	0.62581	0.96684	690	-0.0108126	0.0121335	0.373177	0.917515	675	-0.010413	0.012167	0.392406	0.994624	675	-0.0103857	0.0121792	0.39412	0.995635
Val	734	-0.00574011	0.0104731	0.583806	0.96684	689	-0.00897337	0.0107545	0.404364	0.917515	674	-0.0101607	0.0108395	0.348916	0.994624	674	-0.010251	0.0108484	0.345051	0.995635
NEFA C12:0	736	-0.0306395	0.0363231	0.399215	0.96684	691	-0.0253336	0.0376242	0.500971	0.917515	676	-0.0277727	0.0373986	0.457985	0.994624	676	-0.0287737	0.0373881	0.441821	0.995635
NEFA C14:0	736	-0.0317182	0.0321965	0.324886	0.96684	691	-0.0223302	0.0333158	0.502926	0.917515	676	-0.021968	0.0336192	0.513707	0.994624	676	-0.0226358	0.0336259	0.501082	0.995635
NEFA C14:1	738	-0.0324766	0.0380971	0.394237	0.96684	693	-0.0200229	0.0393158	0.610722	0.96097	678	-0.0178208	0.0397272	0.653885	0.998613	678	-0.0188952	0.0397077	0.634336	0.995866
NEFA C15:0	734	-0.0265022	0.0277423	0.339749	0.96684	690	-0.0183079	0.0282814	0.517629	0.917515	675	-0.0163496	0.0284904	0.566258	0.997458	675	-0.0170294	0.0284858	0.550169	0.995635
NEFA C15:1	637	-0.021456	0.0355662	0.54655	0.96684	599	-0.0082962	0.0363752	0.819671	0.987917	587	-0.00410828	0.036622	0.91072	0.998613	587	-0.00468615	0.0366144	0.898205	0.995866
NEFA C16:0	736	-0.0212951	0.018849	0.258951	0.96684	691	-0.0175615	0.0194547	0.367019	0.917515	676	-0.0180042	0.0196693	0.360351	0.994624	676	-0.0189884	0.019592	0.332811	0.995635
NEFA C16:1	739	-0.0350477	0.0328013	0.285661	0.96684	694	-0.02353	0.0339286	0.488228	0.917515	679	-0.0241924	0.0341814	0.479345	0.994624	679	-0.0251357	0.0341473	0.461938	0.995635
NEFA C17:0	734	-0.00895862	0.0187782	0.633455	0.96684	690	-0.00323293	0.0189803	0.864802	0.987917	675	-0.00288399	0.0191541	0.880364	0.998613	675	-0.00395067	0.0190753	0.83599	0.995866
NEFA C17:1	735	-0.0230644	0.0253083	0.362425	0.96684	691	-0.0141825	0.0259412	0.584756	0.940108	676	-0.0123958	0.0261839	0.636077	0.998613	676	-0.012995	0.0261825	0.619836	0.995866
NEFA C18:0	733	-0.00253367	0.0160118	0.874314	0.979156	688	-0.00188048	0.0164597	0.909076	0.987917	673	-0.00106178	0.0167035	0.949335	0.998613	673	-0.00196607	0.0166291	0.905922	0.995866
NEFA C18:1	736	-0.0248444	0.0241206	0.303355	0.96684	691	-0.0177683	0.0250336	0.47809	0.917515	676	-0.0178871	0.0252236	0.478492	0.994624	676	-0.0184277	0.0252255	0.465338	0.995635
NEFA C18:2	736	-0.00917096	0.0247884	0.711514	0.96684	691	-0.00171006	0.025875	0.947327	0.987917	676	-0.00153887	0.0260343	0.952883	0.998613	676	-0.00259514	0.0259758	0.92045	0.995866
NEFA C18:3	735	-0.015066	0.0311598	0.628882	0.96684	690	-0.00756647	0.0323963	0.815399	0.987917	676	-0.00896758	0.0327695	0.784436	0.998613	676	-0.00993998	0.032745	0.761563	0.995866
NEFA C20:0	580	-0.0136164	0.0198642	0.493326	0.96684	551	-0.0181146	0.0201496	0.369058	0.917515	540	-0.0181509	0.0203239	0.37223	0.994624	540	-0.0180419	0.0203381	0.37544	0.995635
NEFA C20:1	736	-0.0364807	0.0200046	0.0686268	0.76788	691	-0.0368976	0.0205499	0.0730263	0.748146	676	-0.0363129	0.0206867	0.0796674	0.896184	676	-0.0364739	0.0207043	0.0785997	0.87366
NEFA C20:2	643	-0.0257317	0.0241661	0.287384	0.96684	606	-0.0273135	0.0247279	0.269804	0.917515	593	-0.0281057	0.0249148	0.259765	0.994624	593	-0.0265893	0.0248051	0.284209	0.995635
NEFA C20:3	694	-0.0243422	0.0206968	0.239955	0.96684	656	-0.0206344	0.0215292	0.33821	0.917515	643	-0.0187171	0.0217618	0.390072	0.994624	643	-0.018831	0.0217555	0.387063	0.995635
NEFA C20:4	736	-0.0230528	0.0201307	0.252527	0.96684	691	-0.0139003	0.0208008	0.5042	0.917515	676	-0.0124365	0.0210339	0.554551	0.997458	676	-0.0131153	0.021009	0.53267	0.995635
NEFA C22:0	604	-0.0368364	0.0316433	0.244851	0.96684	573	-0.0388522	0.0321944	0.228027	0.917515	561	-0.04	0.0326515	0.221091	0.994624	561	-0.039845	0.0326849	0.223356	0.995635
NEFA C22:1	646	-0.00930427	0.0240102	0.698507	0.96684	608	-0.00921043	0.0246698	0.709024	0.987917	596	-0.0108466	0.0249148	0.663474	0.998613	596	-0.0108482	0.0249201	0.663496	0.995866
NEFA C22:2	635	-0.00185339	0.0202213	0.927002	0.979156	598	-0.0059283	0.0207601	0.775316	0.987917	586	-0.00620186	0.0209896	0.767742	0.998613	586	-0.0061614	0.0210076	0.769407	0.995866
NEFA C22:6	736	-0.0157508	0.019959	0.430283	0.96684	691	-0.0126282	0.0204895	0.53789	0.917515	676	-0.0125539	0.0207369	0.545133	0.997458	676	-0.0145437	0.0202946	0.473862	0.995635
NEFA C24:1	695	-0.0280328	0.0153555	0.068352	0.76788	657	-0.0306189	0.0155996	0.0501074	0.748032	644	-0.030567	0.0157073	0.0521037	0.896184	644	-0.0305573	0.0157199	0.0523667	0.863987
NEFA C16:2	671	-0.0145247	0.0282435	0.607239	0.96684	629	-0.00943586	0.0291313	0.74612	0.987917	616	-0.0110044	0.0293516	0.707857	0.998613	616	-0.0126583	0.0292053	0.664865	0.995866
NEFA C16:3	589	-0.00429631	0.0268554	0.872954	0.979156	555	0.00635021	0.0277301	0.818956	0.987917	545	0.00154029	0.0279982	0.956149	0.998613	545	-0.000897947	0.0278222	0.974266	0.998062
NEFA C18:4	660	-0.0542079	0.0349277	0.121154	0.854183	618	-0.065959	0.0361395	0.0684852	0.748146	605	-0.0645578	0.0365909	0.078208	0.896184	605	-0.0672481	0.0363737	0.0649961	0.863987
NEFA C19:1	736	-0.0172224	0.0227011	0.448306	0.96684	691	-0.013424	0.0230745	0.560919	0.917515	676	-0.0119976	0.0233084	0.606917	0.998613	676	-0.0126767	0.0232924	0.586462	0.995866
NEFA C20:5	668	-0.0112735	0.0316913	0.722158	0.96684	626	-0.00104569	0.0327922	0.974572	0.987917	611	-0.00403988	0.0329518	0.902466	0.998613	611	-0.00632179	0.0323387	0.84508	0.995866
NEFA C22:3	565	-0.0269533	0.022102	0.223181	0.96684	534	-0.0317967	0.0222117	0.152889	0.917515	523	-0.0326484	0.0224014	0.145629	0.991914	523	-0.0326839	0.0224243	0.145603	0.981647
NEFA C22:4	736	-0.0142409	0.0181543	0.433043	0.96684	691	-0.0111105	0.0187178	0.552996	0.917515	676	-0.0108302	0.0188894	0.566609	0.997458	676	-0.0118819	0.0187541	0.52659	0.995635
NEFA C22:5	737	-0.0411257	0.0205717	0.0459701	0.739058	692	-0.0357178	0.0211443	0.0916419	0.766126	677	-0.034619	0.0213715	0.105746	0.91546	677	-0.0357777	0.0212396	0.092571	0.87366
NEFA C24:2	540	-0.00345778	0.0178709	0.846653	0.973265	505	0.00160444	0.0185124	0.930971	0.987917	494	0.00558076	0.0186906	0.765388	0.998613	494	0.00489515	0.0185319	0.791783	0.995866
NEFA C24:3	561	-0.00633176	0.019268	0.742573	0.96684	530	-0.0143772	0.0195492	0.462413	0.917515	518	-0.013802	0.0197221	0.484365	0.994624	518	-0.013914	0.0197449	0.481338	0.995635
NEFA C24:4	737	-0.00371546	0.0180818	0.837254	0.972145	692	-0.00214961	0.018571	0.907885	0.987917	677	-0.00112151	0.0187656	0.952362	0.998613	677	-0.00217638	0.0186399	0.907087	0.995866
NEFA C26:0	605	0.00526221	0.0235796	0.823482	0.972145	577	0.00603995	0.0243197	0.80395	0.987917	565	0.00649954	0.0245828	0.791577	0.998613	565	0.00658803	0.0245606	0.78862	0.995866
NEFA C26:3	637	-0.0105347	0.0175359	0.548226	0.96684	598	-0.0166084	0.0179116	0.35419	0.917515	585	-0.0163321	0.0179832	0.364172	0.994624	585	-0.0161423	0.0180009	0.370239	0.995635
NEFA C26:4	530	-0.00484916	0.0181877	0.78987	0.96684	492	-0.00366256	0.0189801	0.847067	0.987917	483	-0.00560774	0.0190953	0.769141	0.998613	483	-0.00836785	0.0190379	0.66048	0.995866
C14:0	723	-0.00487001	0.0141735	0.731247	0.96684	679	0.000760632	0.0142803	0.957537	0.987917	664	-3.67867e-05	0.0143214	0.997951	0.998613	664	-0.000544512	0.0142759	0.969586	0.998062
C15:1	725	-0.0160672	0.0242102	0.507123	0.96684	681	-0.00818473	0.0240092	0.733286	0.987917	666	-0.00688119	0.0240705	0.775064	0.998613	666	-0.00723947	0.0240766	0.76375	0.995866
C16:0	733	-0.0119714	0.00940478	0.203457	0.96684	689	-0.0137107	0.00967094	0.15673	0.917515	674	-0.0129211	0.00980623	0.188077	0.994624	674	-0.0129101	0.00981603	0.188895	0.995635
C16:1 n7	732	-0.000449875	0.0138539	0.974104	0.983515	689	0.00403971	0.014208	0.776247	0.987917	674	0.00499125	0.0143437	0.727969	0.998613	674	0.00494242	0.0143579	0.730783	0.995866
C17:0	722	-0.0159136	0.0151019	0.292351	0.96684	678	-0.0115729	0.0151413	0.444943	0.917515	663	-0.0117349	0.0152134	0.440778	0.994624	663	-0.012673	0.0150921	0.401379	0.995635
C18:0	733	-0.0118537	0.00957863	0.216294	0.96684	689	-0.0128422	0.00975693	0.188545	0.917515	674	-0.0123811	0.00987147	0.210199	0.994624	674	-0.0124401	0.00988082	0.20847	0.995635
C18:1 n9	732	-0.00806632	0.00958667	0.400394	0.96684	688	-0.0102513	0.00996182	0.303819	0.917515	673	-0.0112939	0.0100721	0.262561	0.994624	673	-0.0112601	0.0100818	0.264453	0.995635
C18:1 n7	734	-0.00790078	0.0113379	0.486119	0.96684	690	-0.0114294	0.0114931	0.320354	0.917515	675	-0.0120082	0.011592	0.300626	0.994624	675	-0.0117345	0.0115934	0.311823	0.995635
C18:2 n6	733	0.00241852	0.0126856	0.848852	0.973265	689	0.00644359	0.0132054	0.625742	0.961618	674	0.0066462	0.013377	0.619469	0.998613	674	0.00579509	0.013307	0.663348	0.995866
C18:3 n6	722	-0.0178598	0.0174314	0.305908	0.96684	678	-0.0160325	0.0178196	0.368597	0.917515	663	-0.0150122	0.0179509	0.403298	0.994624	663	-0.0152102	0.0179609	0.397391	0.995635
C18:3 n3	717	-0.0173489	0.0272637	0.52476	0.96684	674	-0.00716994	0.0278245	0.796731	0.987917	659	-0.0094158	0.0280179	0.736932	0.998613	659	-0.010832	0.0277152	0.696048	0.995866
C20:1 n9	694	-0.00743722	0.0238296	0.755059	0.96684	651	-0.0232854	0.024489	0.342039	0.917515	636	-0.0239623	0.0247721	0.333764	0.994624	636	-0.0245554	0.0247773	0.322049	0.995635
C20:2 n6	720	-0.0106366	0.0172785	0.538356	0.96684	676	-0.0151569	0.0179038	0.397535	0.917515	661	-0.0138971	0.0181056	0.443028	0.994624	661	-0.0135619	0.0181122	0.454266	0.995635
C20:3 n9	734	-0.0118814	0.0271626	0.661938	0.96684	690	-0.0265488	0.0275461	0.335492	0.917515	675	-0.024232	0.0274041	0.376883	0.994624	675	-0.0200962	0.02622	0.443684	0.995635
C20:3 n6	732	-0.00943165	0.0132019	0.475198	0.96684	688	-0.0121272	0.0134758	0.368478	0.917515	673	-0.0112924	0.0137	0.410087	0.994624	673	-0.0103139	0.0136044	0.448643	0.995635
C20:4 n6	732	-0.00884965	0.0108211	0.41373	0.96684	688	-0.00975006	0.010932	0.372771	0.917515	673	-0.00927608	0.0110238	0.400393	0.994624	673	-0.00943407	0.0110315	0.392753	0.995635
C20:3 n3	714	-0.0125314	0.0188125	0.505549	0.96684	670	-0.0151116	0.019358	0.435294	0.917515	655	-0.0137045	0.0196222	0.485169	0.994624	655	-0.0138775	0.019637	0.480008	0.995635
C20:5 n3	729	-0.00320738	0.0247974	0.897122	0.979156	685	-0.00759694	0.0255122	0.765966	0.987917	670	-0.00552329	0.0257962	0.830526	0.998613	670	-0.00693507	0.0255973	0.78653	0.995866
C22:4 n6	716	-0.0275586	0.0146464	0.060298	0.76788	672	-0.0304218	0.0150325	0.0433982	0.69771	657	-0.030265	0.0151943	0.0468066	0.896184	657	-0.0301007	0.0152075	0.0482027	0.863987
C22:5 n6	734	-0.0312675	0.0192354	0.104482	0.854183	690	-0.0356778	0.0198692	0.0729957	0.748146	675	-0.0346617	0.019919	0.0822997	0.896184	675	-0.0323978	0.019444	0.0961444	0.87366
C22:5 n3	731	-0.0339136	0.0245608	0.167763	0.96684	687	-0.0268997	0.0242677	0.268057	0.917515	672	-0.0243775	0.0244202	0.318524	0.994624	672	-0.0253432	0.0243342	0.298042	0.995635
C22:6 n3	734	-0.0084169	0.0148144	0.570102	0.96684	690	-0.00742083	0.0148469	0.617361	0.96097	675	-0.00551256	0.0149272	0.712025	0.998613	675	-0.0063026	0.014876	0.671939	0.995866
AC C10:0	673	-0.0110025	0.0239685	0.646358	0.96684	635	-0.0101433	0.0247276	0.681801	0.987917	621	-0.00873689	0.0249911	0.726762	0.998613	621	-0.0094026	0.0249714	0.706653	0.995866
AC C10:1	650	0.018875	0.0238086	0.428201	0.96684	616	0.036286	0.0243722	0.137064	0.917515	602	0.0376599	0.0247208	0.128204	0.991914	602	0.0373306	0.0247042	0.131311	0.981647
AC C12:0	682	-0.00914625	0.0249119	0.713628	0.96684	644	-0.00665325	0.0253741	0.793249	0.987917	631	-0.0056406	0.0255799	0.825549	0.998613	631	-0.00543693	0.0254951	0.831201	0.995866
AC C14:1	733	0.00933046	0.0218338	0.669261	0.96684	691	0.0142228	0.0225275	0.528027	0.917515	676	0.0133605	0.0226878	0.556144	0.997458	676	0.0126337	0.0226564	0.577295	0.995866
AC C16:0	738	0.0139879	0.0252305	0.579474	0.96684	693	0.00349992	0.0258564	0.892368	0.987917	678	0.00627356	0.0259262	0.808874	0.998613	678	0.00624808	0.0259505	0.80981	0.995866
AC C18:1	693	-0.0280654	0.0275894	0.309396	0.96684	655	-0.0380251	0.0273666	0.165178	0.917515	642	-0.0429736	0.0269998	0.111981	0.91546	642	-0.0430098	0.026999	0.111672	0.905986
AC C2:0	735	0.0139649	0.0191735	0.466641	0.96684	690	0.011746	0.019818	0.553588	0.917515	675	0.0126912	0.0200393	0.52675	0.997458	675	0.0116331	0.0199529	0.560077	0.995635
AC C3:0	737	-0.00853511	0.0217891	0.695385	0.96684	692	-0.0212509	0.0221789	0.338328	0.917515	677	-0.0238687	0.0221767	0.282195	0.994624	677	-0.024016	0.0221954	0.279643	0.995635
AC C8:1	736	0.00769757	0.0335341	0.818511	0.972145	692	0.0114715	0.0350533	0.743574	0.987917	677	0.00872546	0.0349723	0.803056	0.998613	677	0.00727249	0.0348724	0.834868	0.995866
H1	719	0.0498212	0.0575103	0.386621	0.96684	674	0.0687752	0.0584598	0.239845	0.917515	659	0.0701754	0.059198	0.236291	0.994624	659	0.0720909	0.0591809	0.223624	0.995635
LPCa C14:0	736	-0.00665246	0.0179579	0.711158	0.96684	692	-0.0159159	0.0183296	0.385534	0.917515	677	-0.0124551	0.0184485	0.499836	0.994624	677	-0.0106779	0.0180253	0.553799	0.995635
LPCa C16:0	737	-0.0113637	0.0143437	0.428478	0.96684	692	-0.0147715	0.0146198	0.312682	0.917515	677	-0.013209	0.014787	0.372037	0.994624	677	-0.0120362	0.014554	0.408539	0.995635
LPCa C16:1	737	-0.00137923	0.0186945	0.941208	0.979156	692	-0.0107715	0.018773	0.566313	0.917515	677	-0.008171	0.0190104	0.667471	0.998613	677	-0.00450089	0.0177489	0.799895	0.995866
LPCa C18:0	738	-0.0193124	0.0168811	0.252993	0.96684	693	-0.0199949	0.0173881	0.25059	0.917515	678	-0.0191423	0.0175578	0.276008	0.994624	678	-0.0184906	0.01752	0.291633	0.995635
LPCa C18:1	739	-0.0122544	0.0170172	0.471688	0.96684	694	-0.0206842	0.0169726	0.223397	0.917515	679	-0.0189567	0.0171365	0.269042	0.994624	679	-0.0161023	0.0161412	0.318848	0.995635
LPCa C18:2	736	0.00407573	0.0195744	0.835118	0.972145	691	0.000764159	0.0196698	0.969022	0.987917	676	0.00441051	0.0199157	0.824805	0.998613	676	0.00696748	0.0193486	0.718887	0.995866
LPCa C18:3	604	-0.00765839	0.0316048	0.808618	0.971272	576	-0.0142161	0.0321471	0.658502	0.987917	564	-0.0126007	0.0324143	0.697624	0.998613	564	-0.015006	0.0318364	0.637583	0.995866
LPCa C20:3	736	0.00286153	0.0210577	0.891946	0.979156	691	-0.000320148	0.0211319	0.987917	0.987917	676	0.00142913	0.0214519	0.946905	0.998613	676	0.00488708	0.0204679	0.811361	0.995866
LPCa C20:4	735	-0.00228825	0.0191078	0.904711	0.979156	690	-0.00679717	0.0189619	0.720109	0.987917	675	-0.00472475	0.019224	0.805936	0.998613	675	-0.00219973	0.0187525	0.906656	0.995866
LPCa C22:6	668	-0.00656331	0.0216827	0.762216	0.96684	629	-0.00903344	0.0222246	0.684547	0.987917	616	-0.00836594	0.0223375	0.708149	0.998613	616	-0.00695924	0.0221107	0.753066	0.995866
LPCe C16:0	692	-0.00147009	0.022866	0.948757	0.979156	654	-0.0108973	0.0233429	0.640778	0.971134	641	-0.00870354	0.0233862	0.709898	0.998613	641	-0.00809712	0.0232247	0.727477	0.995866
LPCe C18:0	733	-0.00105131	0.0230893	0.963696	0.979156	688	0.0020255	0.0233909	0.931021	0.987917	673	0.00667971	0.0232177	0.773669	0.998613	673	0.00672237	0.0232385	0.772462	0.995866
LPCe C18:1	411	-0.0320278	0.0311379	0.304299	0.96684	389	-0.0325949	0.032048	0.309786	0.917515	383	-0.0345917	0.0320592	0.281306	0.994624	383	-0.0331059	0.0318282	0.298967	0.995635
PCa C28:2	560	0.0186441	0.0320033	0.560426	0.96684	531	0.0207713	0.0334003	0.534292	0.917515	521	0.0221214	0.0333653	0.507634	0.994624	521	0.0220395	0.0333792	0.509384	0.995635
PCa C30:0	737	0.0264685	0.0211168	0.210456	0.96684	692	0.0201925	0.0217611	0.353786	0.917515	677	0.0224238	0.0219907	0.308254	0.994624	677	0.0224859	0.0220123	0.307392	0.995635
PCa C30:2	700	0.00116644	0.0206246	0.954916	0.979156	660	-0.00210852	0.0211535	0.920632	0.987917	645	-0.00174442	0.0213072	0.934777	0.998613	645	-0.00184802	0.0213169	0.930944	0.995866
PCa C32:0	739	0.00865983	0.0181732	0.633851	0.96684	694	0.00201856	0.0185507	0.913383	0.987917	679	0.00259388	0.0188241	0.890444	0.998613	679	0.00197497	0.0188	0.916367	0.995866
PCa C32:1	737	-0.00840206	0.0236844	0.72288	0.96684	692	-0.01671	0.0241016	0.488353	0.917515	677	-0.0115912	0.0243295	0.63393	0.998613	677	-0.0100633	0.0241872	0.677504	0.995866
PCa C32:2	733	0.00189986	0.0191779	0.921114	0.979156	688	0.00295617	0.0200415	0.88278	0.987917	673	0.00432687	0.0202868	0.831172	0.998613	673	0.0047827	0.0202928	0.813752	0.995866
PCa C32:3	727	-0.0228364	0.0196236	0.244928	0.96684	683	-0.0242213	0.0199916	0.226109	0.917515	668	-0.0221049	0.020243	0.275252	0.994624	668	-0.0214215	0.0201853	0.288978	0.995635
PCa C34:1	738	-0.00822776	0.0163019	0.613915	0.96684	693	-0.0132813	0.0165738	0.423217	0.917515	678	-0.0114503	0.0167737	0.495081	0.994624	678	-0.0109683	0.0167669	0.513238	0.995635
PCa C34:2	736	0.00527419	0.0180768	0.77055	0.96684	691	0.00658466	0.0187336	0.725333	0.987917	676	0.00973793	0.0190254	0.608937	0.998613	676	0.00925653	0.01902	0.626654	0.995866
PCa C34:3	738	-0.00397784	0.0192333	0.836208	0.972145	693	-0.00434857	0.0200334	0.828223	0.987917	678	-0.000532335	0.0202574	0.979043	0.998613	678	-0.000165684	0.0202663	0.99348	0.998062
PCa C34:4	736	-0.0122061	0.0216829	0.573655	0.96684	692	-0.0144476	0.0226024	0.522908	0.917515	677	-0.0110582	0.0226539	0.625616	0.998613	677	-0.0105684	0.022653	0.640991	0.995866
PCa C34:5	493	-0.0466311	0.0417919	0.265069	0.96684	465	-0.0385275	0.0433903	0.375059	0.917515	455	-0.03139	0.043947	0.475445	0.994624	455	-0.0313406	0.0439987	0.476659	0.995635
PCa C36:1	736	-0.0169467	0.0164937	0.304548	0.96684	691	-0.0220623	0.0168297	0.190338	0.917515	676	-0.020853	0.016962	0.219371	0.994624	676	-0.0203172	0.0169501	0.231104	0.995635
PCa C36:2	735	0.00444138	0.0172136	0.796469	0.96684	690	0.00407634	0.0178116	0.819049	0.987917	675	0.00622405	0.0180898	0.73091	0.998613	675	0.00598234	0.0181011	0.741132	0.995866
PCa C36:3	736	-0.0137936	0.0174863	0.430475	0.96684	691	-0.0140628	0.0178046	0.429901	0.917515	676	-0.0116522	0.0180594	0.519017	0.995179	676	-0.0104665	0.0179242	0.559471	0.995635
PCa C36:4	737	-0.00617415	0.0161869	0.702998	0.96684	692	-0.00546746	0.0164338	0.739468	0.987917	677	-0.0015515	0.0165675	0.925418	0.998613	677	-0.00182024	0.0165765	0.912595	0.995866
PCa C36:5	738	-0.0326329	0.0207172	0.115659	0.854183	693	-0.0322171	0.0212417	0.129818	0.917515	678	-0.0266914	0.0213894	0.212523	0.994624	678	-0.0282912	0.0212065	0.182645	0.995635
PCa C36:6	673	-0.048736	0.030005	0.1048	0.854183	629	-0.0455862	0.031072	0.142865	0.917515	619	-0.036428	0.031047	0.24114	0.994624	619	-0.036825	0.0310487	0.236083	0.995635
PCa C38:0	733	-0.00184197	0.0212114	0.930824	0.979156	689	-0.00235041	0.0217701	0.914056	0.987917	674	0.00329351	0.0219533	0.880793	0.998613	674	0.00252905	0.0219269	0.908212	0.995866
PCa C38:2	612	-0.00347648	0.0283137	0.902319	0.979156	579	0.00154594	0.0291017	0.957654	0.987917	568	0.000234715	0.0291544	0.993579	0.998613	568	7.08939e-05	0.02918	0.998062	0.998062
PCa C38:3	736	-0.0256039	0.0165233	0.121686	0.854183	691	-0.0247053	0.0167374	0.140402	0.917515	676	-0.0229907	0.0169342	0.175046	0.994624	676	-0.022368	0.016901	0.186147	0.995635
PCa C38:4	737	-0.0163297	0.0158491	0.303204	0.96684	692	-0.0149699	0.0160649	0.351757	0.917515	677	-0.0121761	0.0161682	0.451669	0.994624	677	-0.0127403	0.0161429	0.430271	0.995635
PCa C38:5	734	-0.0266082	0.0153924	0.084301	0.838996	689	-0.0274733	0.0156674	0.0799727	0.748146	674	-0.0231805	0.0157002	0.140311	0.991914	674	-0.0230134	0.0157121	0.143491	0.981647
PCa C38:6	735	-0.0249901	0.0179217	0.163629	0.96684	690	-0.0240385	0.01823	0.187749	0.917515	676	-0.023856	0.0183682	0.194484	0.994624	676	-0.0244972	0.0183173	0.181566	0.995635
PCa C40:0	572	-0.033649	0.0289833	0.246147	0.96684	537	-0.0311564	0.0298225	0.296638	0.917515	527	-0.0249706	0.0298168	0.402728	0.994624	527	-0.0247118	0.0298156	0.407598	0.995635
PCa C40:4	698	-0.0453221	0.0194648	0.0201821	0.468673	659	-0.0427918	0.0200444	0.0331553	0.68515	646	-0.0384389	0.0201737	0.0571905	0.896184	646	-0.0383979	0.0201855	0.0576024	0.863987
PCa C40:5	738	-0.0647508	0.0226629	0.00439816	0.306405	693	-0.0674662	0.0234316	0.00411341	0.5054	678	-0.063546	0.0235154	0.00706538	0.863201	678	-0.0624906	0.0234231	0.00782278	0.777991
PCa C40:6	737	-0.0342588	0.0203954	0.0934439	0.854183	692	-0.0343878	0.020595	0.0954442	0.767224	678	-0.0341596	0.0207246	0.0997806	0.91546	678	-0.0349066	0.0206891	0.0920448	0.87366
PCa C42:0	493	-0.0346807	0.0295808	0.241615	0.96684	466	-0.0299168	0.0302838	0.323747	0.917515	456	-0.0236641	0.030833	0.443206	0.994624	456	-0.0229362	0.03076	0.456284	0.995635
PCa C42:1	385	-0.017212	0.0318795	0.58958	0.96684	365	-0.0196429	0.0325573	0.54668	0.917515	357	-0.0205448	0.0330922	0.535129	0.997458	357	-0.0199444	0.0327946	0.543491	0.995635
PCa C42:5	385	-0.0760223	0.0297305	0.0109503	0.336125	364	-0.0814014	0.031122	0.00929824	0.5054	357	-0.0753055	0.0315244	0.0174531	0.863201	357	-0.074683	0.0313994	0.0179423	0.777991
PCa C43:6	689	-0.0104599	0.0234282	0.655405	0.96684	652	-0.00323891	0.0240585	0.892951	0.987917	640	4.22464e-05	0.0242895	0.998613	0.998613	640	-6.02906e-05	0.0242783	0.998019	0.998062
PCa C44:12	690	-0.00926191	0.0236245	0.695147	0.96684	651	-0.00392903	0.0242758	0.871477	0.987917	638	-0.00189287	0.0245592	0.93859	0.998613	638	-0.00189143	0.0245793	0.938687	0.995866
PCe C32:0	739	0.00523617	0.0187386	0.779993	0.96684	694	0.000397755	0.0194298	0.983673	0.987917	679	0.00235141	0.0196467	0.90477	0.998613	679	0.00276802	0.0196472	0.888003	0.995866
PCe C32:1	739	0.00503422	0.0185939	0.786664	0.96684	694	-0.00559254	0.0192039	0.770973	0.987917	679	-0.00380175	0.0193942	0.844651	0.998613	679	-0.00381814	0.0194126	0.844137	0.995866
PCe C32:2	700	0.0139677	0.0247631	0.572905	0.96684	660	0.00490973	0.0254749	0.847233	0.987917	645	0.00776077	0.0254848	0.760829	0.998613	645	0.00724294	0.0254845	0.776345	0.995866
PCe C34:0	739	-0.00124617	0.0234099	0.957561	0.979156	694	-0.00143391	0.0238715	0.95212	0.987917	679	0.00364302	0.0239114	0.878954	0.998613	679	0.00328583	0.0239232	0.890797	0.995866
PCe C34:1	737	-0.00253775	0.017668	0.885829	0.979156	692	-0.00929327	0.0183031	0.611801	0.96097	677	-0.00554024	0.0184547	0.764115	0.998613	677	-0.0049776	0.0184438	0.787339	0.995866
PCe C34:2	737	-0.00683792	0.017231	0.691605	0.96684	692	-0.0124561	0.017945	0.487842	0.917515	677	-0.00896503	0.01814	0.621323	0.998613	677	-0.00907995	0.0181568	0.617185	0.995866
PCe C34:3	737	-0.0127282	0.0211115	0.546764	0.96684	692	-0.00797054	0.022027	0.717576	0.987917	677	-0.00450457	0.0221582	0.838971	0.998613	677	-0.00597722	0.0220121	0.78606	0.995866
PCe C34:4	623	-0.0333826	0.0413028	0.419268	0.96684	585	-0.035554	0.0424802	0.402974	0.917515	572	-0.035585	0.0430887	0.409247	0.994624	572	-0.0356374	0.0431326	0.409036	0.995635
PCe C36:0	590	-0.0234702	0.0259014	0.365243	0.96684	554	-0.0273661	0.026956	0.310465	0.917515	543	-0.0239324	0.0271286	0.378085	0.994624	543	-0.0239339	0.0271548	0.378515	0.995635
PCe C36:1	737	-0.015306	0.0199756	0.443789	0.96684	692	-0.0127469	0.0205601	0.535481	0.917515	677	-0.0111677	0.0206866	0.589485	0.998613	677	-0.0116128	0.0206911	0.574824	0.995866
PCe C36:2	736	0.0101468	0.0192096	0.597512	0.96684	691	0.0101778	0.0198694	0.608658	0.96097	676	0.01416	0.0198811	0.476573	0.994624	676	0.0134919	0.019861	0.497179	0.995635
PCe C36:3	735	-0.0155922	0.0183739	0.396386	0.96684	690	-0.0166225	0.0190462	0.383117	0.917515	675	-0.0127157	0.0192776	0.509741	0.994624	675	-0.0118198	0.0192311	0.539022	0.995635
PCe C36:4	737	-0.00423775	0.0167467	0.800302	0.96684	692	-0.00731732	0.0173189	0.672792	0.987917	677	-0.00222442	0.0174205	0.898434	0.998613	677	-0.00180101	0.0174202	0.917689	0.995866
PCe C36:5	737	-0.00456988	0.0180593	0.800303	0.96684	692	-0.0106513	0.0185141	0.565275	0.917515	677	-0.0075937	0.0187227	0.685179	0.998613	677	-0.00826629	0.0186999	0.658601	0.995866
PCe C36:6	412	-0.000626071	0.0746337	0.993311	0.995946	388	0.0149934	0.0785215	0.848673	0.987917	383	-0.000141513	0.0790506	0.998573	0.998613	383	-0.000194003	0.079168	0.998046	0.998062
PCe C38:0	734	-0.063037	0.0229897	0.00625971	0.307096	689	-0.0603417	0.0234852	0.0104062	0.5054	674	-0.0536916	0.0236735	0.0236577	0.863201	674	-0.0557726	0.023352	0.0172107	0.777991
PCe C38:2	726	-0.0926783	0.0318445	0.0037237	0.306405	681	-0.0810169	0.0321946	0.0120909	0.5054	666	-0.0756859	0.0324572	0.0200174	0.863201	666	-0.0763345	0.0324783	0.0190607	0.777991
PCe C38:3	730	-0.0759095	0.0236969	0.00141887	0.296544	685	-0.0666497	0.0242472	0.00614584	0.5054	670	-0.0628758	0.0245	0.0105025	0.863201	670	-0.0638825	0.0244405	0.0091642	0.777991
PCe C38:4	736	-0.0143072	0.0158344	0.366538	0.96684	691	-0.0116131	0.0163674	0.478245	0.917515	676	-0.00726551	0.0163555	0.657028	0.998613	676	-0.00756122	0.0163627	0.644164	0.995866
PCe C38:5	736	-0.00904352	0.0166657	0.587544	0.96684	691	-0.0102256	0.0172349	0.553178	0.917515	676	-0.00594076	0.0173595	0.732297	0.998613	676	-0.00581629	0.0173753	0.737925	0.995866
PCe C38:6	737	-0.00371595	0.0179612	0.836156	0.972145	692	-0.00322944	0.018576	0.862036	0.987917	677	0.00283372	0.0186768	0.879452	0.998613	677	0.00213179	0.0186508	0.909035	0.995866
PCe C40:0	734	-0.0231342	0.0169124	0.171778	0.96684	690	-0.0227027	0.0173061	0.19003	0.917515	676	-0.0212854	0.0174438	0.222822	0.994624	676	-0.0220802	0.0173965	0.204812	0.995635
PCe C40:1	633	-0.0441725	0.0282579	0.11852	0.854183	595	-0.0555406	0.0294086	0.0594529	0.748146	585	-0.050313	0.0296293	0.0900472	0.896184	585	-0.0503178	0.0296481	0.0902211	0.87366
PCe C40:3	571	-0.0835823	0.0353895	0.0185311	0.468673	534	-0.07489	0.0363558	0.039911	0.695116	524	-0.0670871	0.0362015	0.0644489	0.896184	524	-0.0666109	0.0361722	0.0661426	0.863987
PCe C40:4	731	-0.0399249	0.0199154	0.0453705	0.739058	686	-0.0356983	0.0203679	0.0801209	0.748146	672	-0.0296853	0.0204514	0.147126	0.991914	672	-0.0306925	0.0203846	0.132643	0.981647
PCe C40:5	732	-0.056078	0.0220676	0.0112578	0.336125	687	-0.0511966	0.0223615	0.0223646	0.667742	672	-0.0479581	0.0225498	0.0338187	0.863201	672	-0.0489812	0.0224906	0.0297795	0.777991
PCe C40:6	735	-0.0181784	0.0191838	0.343657	0.96684	690	-0.0149939	0.0193385	0.438414	0.917515	675	-0.0100502	0.019241	0.601618	0.998613	675	-0.0112323	0.0190651	0.555963	0.995635
PCe C42:1	406	-0.0638684	0.0351291	0.0698072	0.76788	382	-0.0445529	0.036901	0.228079	0.917515	374	-0.036738	0.0365288	0.315236	0.994624	374	-0.0367152	0.0364928	0.315061	0.995635
PCe C42:2	581	-0.0775115	0.0342732	0.0241021	0.503735	547	-0.0624133	0.0357738	0.0816277	0.748146	536	-0.0584768	0.036051	0.105407	0.91546	536	-0.0589183	0.0360611	0.102907	0.896149
PCe C42:3	492	-0.0261955	0.035767	0.464287	0.96684	465	-0.0158164	0.0370417	0.669595	0.987917	456	-0.00784879	0.0373399	0.833611	0.998613	456	-0.00742856	0.0373236	0.842332	0.995866
PCe C42:4	673	-0.0443755	0.0235044	0.0594716	0.76788	634	-0.0313067	0.0241592	0.195517	0.917515	624	-0.0317971	0.0244127	0.193252	0.994624	624	-0.0318018	0.0243495	0.192037	0.995635
PCe C42:5	639	-0.0654243	0.0243255	0.00734678	0.307096	601	-0.0599585	0.0247039	0.0155253	0.540796	591	-0.0561104	0.0249431	0.024862	0.863201	591	-0.0561304	0.0249422	0.0248064	0.777991
PCe C42:6	665	-0.0129297	0.0242732	0.594443	0.96684	627	-0.0065682	0.0245087	0.788795	0.987917	612	-0.00148367	0.0248182	0.95235	0.998613	612	-0.00334922	0.0246799	0.8921	0.995866
SMa C30:1	586	0.00314412	0.0317316	0.921106	0.979156	550	0.00267161	0.0327277	0.934971	0.987917	539	0.00705218	0.0329046	0.830381	0.998613	539	0.00662138	0.0328971	0.840563	0.995866
SMa C32:1	738	0.0104137	0.0165882	0.530351	0.96684	693	0.0100895	0.0171175	0.555777	0.917515	678	0.0124542	0.0172886	0.471556	0.994624	678	0.0125957	0.0173038	0.466928	0.995635
SMa C32:2	737	0.0150865	0.0208842	0.47029	0.96684	692	0.0171375	0.0212994	0.421337	0.917515	677	0.0189376	0.0215139	0.379048	0.994624	677	0.0199168	0.021442	0.353302	0.995635
SMa C33:1	737	-0.000725531	0.0165766	0.965101	0.979156	692	-0.000552982	0.0172179	0.974389	0.987917	677	0.00150292	0.0172685	0.930673	0.998613	677	0.00138772	0.0172844	0.936033	0.995866
SMa C34:0	730	-0.00791958	0.0157868	0.616064	0.96684	686	-0.0111863	0.0160559	0.486229	0.917515	671	-0.0119885	0.0162779	0.461701	0.994624	671	-0.0117334	0.0162819	0.471391	0.995635
SMa C34:1	737	0.00449752	0.0137101	0.742975	0.96684	692	0.00239934	0.0141832	0.865716	0.987917	677	0.00352578	0.0143709	0.80627	0.998613	677	0.00332359	0.0143803	0.817294	0.995866
SMa C34:2	739	-0.00672995	0.0163822	0.681334	0.96684	694	-0.0100144	0.0168832	0.553275	0.917515	679	-0.00733774	0.0170994	0.667975	0.998613	679	-0.00689821	0.0170923	0.68665	0.995866
SMa C35:1	737	0.0109336	0.0172689	0.526845	0.96684	692	0.0117462	0.0179339	0.512713	0.917515	677	0.0129367	0.0180003	0.47259	0.994624	677	0.0126539	0.018003	0.482385	0.995635
SMa C36:0	500	-0.00521239	0.0201608	0.796099	0.96684	475	0.00199571	0.0198967	0.920148	0.987917	467	-0.00108488	0.0199846	0.956732	0.998613	467	-0.000782459	0.0199447	0.968723	0.998062
SMa C36:1	738	0.00436488	0.0147005	0.766613	0.96684	693	0.000885077	0.0150408	0.953093	0.987917	678	0.00155147	0.0152632	0.919068	0.998613	678	0.00171983	0.0152737	0.910382	0.995866
SMa C36:2	739	-0.00575013	0.0167097	0.730857	0.96684	694	-0.00836403	0.0168951	0.620722	0.96097	679	-0.00719104	0.0171349	0.674863	0.998613	679	-0.00680053	0.0171329	0.69155	0.995866
SMa C36:3	671	0.0326496	0.0244411	0.182063	0.96684	636	0.0282049	0.0252202	0.263856	0.917515	623	0.0268077	0.025476	0.2931	0.994624	623	0.0267983	0.0254947	0.293624	0.995635
SMa C38:1	618	-0.0141582	0.0173615	0.415112	0.96684	580	-0.0192551	0.0178794	0.281971	0.917515	570	-0.017891	0.0180214	0.321265	0.994624	570	-0.0172765	0.0180404	0.338659	0.995635
SMa C38:2	737	-0.00185733	0.0167498	0.911737	0.979156	692	-0.000260033	0.0171573	0.987912	0.987917	677	0.00234818	0.0174092	0.892747	0.998613	677	0.00251329	0.0174238	0.885352	0.995866
SMa C38:3	724	-0.0063769	0.0229531	0.78123	0.96684	681	-0.00114966	0.0235495	0.961078	0.987917	666	0.000239243	0.0236437	0.99193	0.998613	666	0.000132736	0.0236657	0.995527	0.998062
SMa C39:1	734	-0.0138499	0.0203322	0.495978	0.96684	689	-0.0060086	0.0207528	0.772265	0.987917	674	-0.000492189	0.0207639	0.981096	0.998613	674	-0.00117499	0.0207474	0.954855	0.998062
SMa C40:1	677	-0.0185433	0.016506	0.261664	0.96684	634	-0.016534	0.0170393	0.332259	0.917515	622	-0.0155122	0.0172133	0.36786	0.994624	622	-0.0148425	0.0172204	0.38908	0.995635
SMa C40:2	738	-0.0156445	0.0171531	0.362045	0.96684	693	-0.019462	0.0176296	0.270017	0.917515	678	-0.0164101	0.0177825	0.356441	0.994624	678	-0.0164604	0.0178	0.355443	0.995635
SMa C40:3	451	-0.0172837	0.0275998	0.531493	0.96684	423	-0.0025853	0.0283352	0.927347	0.987917	415	-0.000301928	0.0284418	0.991535	0.998613	415	0.000171698	0.0284961	0.995196	0.998062
SMa C40:4	728	-0.00835769	0.0173288	0.62974	0.96684	684	-0.00603257	0.017539	0.730992	0.987917	669	-0.0019933	0.0176661	0.910199	0.998613	669	-0.00216409	0.0176794	0.902614	0.995866
SMa C40:5	664	-0.0187552	0.0239959	0.434734	0.96684	625	-0.0227053	0.0244556	0.353556	0.917515	612	-0.0192091	0.0245787	0.434803	0.994624	612	-0.0203436	0.0244107	0.404966	0.995635
SMa C41:1	736	-0.0185758	0.0191155	0.331494	0.96684	691	-0.0205337	0.0196325	0.295985	0.917515	676	-0.0185125	0.0198282	0.350834	0.994624	676	-0.0190498	0.0198273	0.337019	0.995635
SMa C41:2	736	-0.00187128	0.0200651	0.925723	0.979156	692	-0.00753135	0.0208106	0.717541	0.987917	677	-0.00151288	0.0208594	0.942205	0.998613	677	-0.00191335	0.0208664	0.926969	0.995866
SMa C42:1	738	0.000857506	0.0153223	0.955386	0.979156	693	-0.00248892	0.0160358	0.876702	0.987917	678	-0.00295849	0.0161817	0.854989	0.998613	678	-0.00316179	0.0161915	0.845239	0.995866
SMa C42:2	735	-0.00494907	0.0153553	0.747316	0.96684	690	-0.0114583	0.0158929	0.471183	0.917515	675	-0.00992363	0.0161036	0.537955	0.997458	675	-0.0100871	0.0161183	0.531658	0.995635
SMa C42:3	739	-0.0124481	0.0193037	0.519227	0.96684	694	-0.0176643	0.0199527	0.376307	0.917515	679	-0.0135998	0.0200624	0.498092	0.994624	679	-0.0133216	0.0200736	0.507158	0.995635
SMa C42:4	481	0.0114341	0.0214859	0.59486	0.96684	455	0.0142645	0.0215027	0.507436	0.917515	447	0.0164353	0.0216309	0.447792	0.994624	447	0.01493	0.0215165	0.488134	0.995635
SMa C42:5	434	-0.00527893	0.0362353	0.88424	0.979156	410	-0.0134529	0.0375045	0.720011	0.987917	404	-0.00130687	0.0375725	0.972271	0.998613	404	-0.0012701	0.0376204	0.973085	0.998062
SMa C42:6	727	-0.0204258	0.0188232	0.278228	0.96684	683	-0.0196133	0.0192463	0.308543	0.917515	669	-0.0181924	0.019373	0.348051	0.994624	669	-0.0187717	0.0193538	0.332448	0.995635
SMa C43:2	689	-0.0135794	0.0218579	0.534641	0.96684	650	-0.0138497	0.0227228	0.542409	0.917515	637	-0.0130118	0.0227713	0.567931	0.997458	637	-0.0130543	0.0227845	0.566893	0.995635
SMa C44:6	435	-0.0659334	0.0322673	0.0416356	0.739058	416	-0.057519	0.0330245	0.0823319	0.748146	411	-0.0522315	0.0329637	0.113885	0.91546	411	-0.052231	0.0328553	0.112706	0.905986
SMa C21:2	470	0.0686364	0.0473039	0.147473	0.96684	444	0.0749692	0.0472918	0.113654	0.879766	436	0.0838403	0.0476763	0.0793943	0.896184	436	0.0828485	0.0477232	0.0833038	0.87366
SMa C31:1	401	0.000230631	0.0453637	0.995946	0.995946	377	-0.00607682	0.0472886	0.897821	0.987917	371	0.00199684	0.0477217	0.966647	0.998613	371	0.00210984	0.0478023	0.96482	0.998062
SMa C35:2	644	0.0145524	0.0238996	0.542814	0.96684	601	0.0157288	0.0250845	0.530886	0.917515	588	0.0172164	0.0253464	0.497264	0.994624	588	0.0173968	0.0253716	0.493198	0.995635
SMa C37:2	436	0.0187785	0.0293234	0.522263	0.96684	416	0.0254845	0.0299283	0.394994	0.917515	410	0.0276293	0.030215	0.36106	0.994624	410	0.0276664	0.030242	0.360846	0.995635
SMa C37:3	708	0.00406592	0.0296662	0.891027	0.979156	665	0.00687756	0.0307099	0.822865	0.987917	651	0.0108714	0.0310025	0.725961	0.998613	651	0.0108395	0.0310388	0.727038	0.995866
SMa C39:4	516	-0.0164311	0.0281528	0.559725	0.96684	485	-0.0100583	0.028952	0.728439	0.987917	478	-0.00797834	0.0292175	0.784925	0.998613	478	-0.00851615	0.0292098	0.770763	0.995866
SMa C39:5	684	0.0117736	0.023385	0.6148	0.96684	646	0.00814187	0.0241956	0.736606	0.987917	633	0.0112403	0.0244536	0.645927	0.998613	633	0.011206	0.02447	0.647154	0.995866
SMa C41:5	558	-0.0545075	0.0282316	0.0540359	0.76788	526	-0.061828	0.0294159	0.0360605	0.68515	519	-0.0614343	0.0294014	0.0371713	0.863201	519	-0.0613337	0.0294373	0.037715	0.863987
SMa C43:0	350	-0.0278858	0.0292814	0.341603	0.96684	331	-0.0306621	0.0310546	0.324227	0.917515	326	-0.0276508	0.0314211	0.379544	0.994624	326	-0.0260153	0.0311384	0.404103	0.995635

## Sheet: Factor4
	Crude model					Main model					Main model +					Main model ++
	Not Adjusted					Adjusted for city, sex, gestational age, smoking, materanl education, maternal age					Main model, further adjusted for maternal BMI, and maternal gestational weight gain					Main model +, further adjusted for birth weight
Metabolite	n	beta	se	p	p_fdr	n	beta	se	p	p_fdr	n	beta	se	p	p_fdr	n	beta	se	p	p_fdr
Ala	736	-0.0427134	0.0174385	0.0145481	0.166992	691	-0.0308404	0.0177347	0.0824989	0.574742	676	-0.0287037	0.0179523	0.110333	0.643414	676	-0.0296339	0.0178989	0.0982826	0.635049
Arg	737	0.0561924	0.0332138	0.0911098	0.442836	692	0.0489901	0.0333864	0.142748	0.656491	677	0.0434995	0.0340619	0.202033	0.700439	677	0.0450045	0.0339942	0.186007	0.681032
Asn	736	-0.0456893	0.0187955	0.0153065	0.166992	691	-0.0232834	0.0187709	0.215263	0.685958	676	-0.0244232	0.0190712	0.200779	0.700439	676	-0.0246466	0.0190828	0.19697	0.681032
Asp	734	-0.0723202	0.0291598	0.0133621	0.166992	689	-0.0411045	0.0286386	0.151677	0.656491	674	-0.0429169	0.0291914	0.141996	0.686999	674	-0.0433838	0.0291874	0.137665	0.661631
Cit	729	-0.0251724	0.0208951	0.22872	0.522584	684	-0.0172977	0.0216018	0.423564	0.763975	670	-0.0192405	0.0218073	0.377947	0.752295	670	-0.0188561	0.0218221	0.387864	0.736942
Gln	715	-0.0970443	0.0273178	0.000407424	0.081501	674	-0.0813582	0.0277925	0.00353837	0.275309	660	-0.0767356	0.0277794	0.0059058	0.377643	660	-0.0768296	0.0278089	0.00589811	0.345101
Glu	671	2.61541e-05	0.019331	0.998921	0.998921	629	0.00646504	0.0198834	0.745182	0.927042	616	0.00747729	0.019968	0.708194	0.939578	616	0.0073971	0.0199983	0.7116	0.919722
Gly	738	-0.0477925	0.0168067	0.00458632	0.119818	693	-0.032143	0.0169662	0.0585868	0.545613	678	-0.0312588	0.0172229	0.0699898	0.56261	678	-0.0312539	0.0172405	0.0703215	0.577401
His	737	-0.00657341	0.0157756	0.677035	0.909461	692	0.00357474	0.0161531	0.824924	0.947303	677	0.00500489	0.0162747	0.758541	0.939578	677	0.00625376	0.0161415	0.698562	0.919722
Ile	735	-0.0269054	0.0142289	0.0590409	0.363673	690	-0.0211912	0.0148635	0.154419	0.656491	675	-0.0195881	0.01507	0.19413	0.700439	675	-0.0191231	0.0150644	0.204746	0.681032
Leu	736	-0.0216829	0.0141269	0.125258	0.46748	691	-0.0142399	0.0145132	0.326868	0.697949	676	-0.0138578	0.0147367	0.347381	0.733359	676	-0.0138435	0.0147518	0.348374	0.713825
Lys	610	-0.0310629	0.0149095	0.0376387	0.282553	573	-0.0122935	0.0151632	0.417861	0.763975	560	-0.0102204	0.0153976	0.507127	0.790966	560	-0.0103987	0.0154419	0.500979	0.793216
Met	736	-0.0507105	0.0166106	0.00235011	0.0982347	691	-0.0301414	0.0166905	0.0713856	0.545613	676	-0.0299193	0.0169287	0.0776365	0.600964	676	-0.0302466	0.0169369	0.0745924	0.577401
Orn	736	-0.0636403	0.0217826	0.00359153	0.107233	691	-0.0401405	0.0209424	0.0557017	0.545613	676	-0.0427229	0.0212791	0.0450852	0.56261	676	-0.0429124	0.021298	0.0443324	0.534885
Phe	738	-0.0289284	0.0134259	0.0315184	0.268286	693	-0.0164846	0.0135001	0.22249	0.685958	678	-0.01616	0.0137258	0.23949	0.700439	678	-0.0164633	0.0137299	0.230932	0.681032
Pro	737	-0.0300832	0.0147048	0.0411392	0.296486	692	-0.0220377	0.0151234	0.145532	0.656491	677	-0.0218542	0.0153676	0.155479	0.686999	677	-0.0219185	0.015383	0.154682	0.661631
Trp	733	0.00772139	0.013213	0.559149	0.817635	688	0.0139217	0.0137688	0.312334	0.690704	673	0.0162161	0.014	0.247171	0.700439	673	0.0165757	0.0140124	0.237273	0.681032
Ser	736	-0.0476989	0.0185494	0.0103275	0.154175	691	-0.0283461	0.0184972	0.125886	0.656491	676	-0.0269411	0.0188784	0.154035	0.686999	676	-0.0270896	0.0188959	0.152162	0.661631
Thr	736	-0.0261859	0.0162908	0.108405	0.456334	691	-0.015424	0.0169341	0.362718	0.708486	676	-0.0142092	0.0169492	0.402147	0.755694	676	-0.0137366	0.0169452	0.417867	0.747311
Tyr	735	-0.0150253	0.0135774	0.268821	0.564975	690	-0.00726395	0.0137864	0.598443	0.886993	675	-0.00359921	0.0139419	0.796367	0.942018	675	-0.00356277	0.0139561	0.798585	0.927246
Val	734	-0.00363083	0.0118015	0.758432	0.911608	689	0.00280845	0.0121881	0.817833	0.947303	674	0.00378934	0.0123862	0.759755	0.939578	674	0.00367017	0.0123978	0.7673	0.919722
NEFA C12:0	736	-0.0695905	0.0409091	0.0893577	0.442836	691	-0.0599842	0.0426627	0.160188	0.656491	676	-0.0831597	0.0427112	0.0519636	0.56261	676	-0.0845662	0.0427002	0.0480745	0.534885
NEFA C14:0	736	-0.049057	0.0363179	0.177197	0.514363	691	-0.0428224	0.0378264	0.258011	0.685958	676	-0.0554087	0.0384673	0.150234	0.686999	676	-0.0563513	0.038477	0.143531	0.661631
NEFA C14:1	738	-0.0809855	0.0428498	0.0591621	0.363673	693	-0.0760111	0.0445149	0.0881869	0.59455	678	-0.0848244	0.0453347	0.0617847	0.56261	678	-0.0862373	0.0453113	0.0574544	0.57243
NEFA C15:0	734	-0.0410628	0.0313432	0.190582	0.522584	690	-0.0308591	0.0321482	0.337456	0.703165	675	-0.0418438	0.0326427	0.200347	0.700439	675	-0.0427969	0.0326391	0.190251	0.681032
NEFA C15:1	637	-0.0117602	0.041023	0.774458	0.911608	599	-0.0111197	0.0417182	0.789916	0.947303	587	-0.0214834	0.0423568	0.612214	0.870427	587	-0.0200623	0.0423638	0.635989	0.880277
NEFA C16:0	736	-0.0312226	0.0212614	0.142405	0.470246	691	-0.0256797	0.0220936	0.245525	0.685958	676	-0.0266692	0.0225245	0.236844	0.700439	676	-0.0280346	0.0224369	0.211941	0.681032
NEFA C16:1	739	-0.0744343	0.0369494	0.0443292	0.298864	694	-0.0745709	0.0384666	0.0529721	0.545613	679	-0.0777004	0.039075	0.0471752	0.56261	679	-0.0790702	0.0390358	0.0432158	0.534885
NEFA C17:0	734	-0.0146972	0.0211608	0.487563	0.771975	690	-0.00731482	0.0215164	0.733991	0.927042	675	-0.0103573	0.021901	0.636433	0.88089	675	-0.0117408	0.0218115	0.590564	0.856771
NEFA C17:1	735	-0.0342803	0.0285688	0.230567	0.522584	691	-0.0298973	0.0294556	0.310477	0.690704	676	-0.0323222	0.0299761	0.281317	0.700439	676	-0.0331618	0.0299763	0.269022	0.681032
NEFA C18:0	733	-0.015709	0.0180968	0.385656	0.675469	688	-0.015851	0.0187232	0.397524	0.745194	673	-0.0157618	0.0191583	0.410974	0.755694	673	-0.0168889	0.0190722	0.376204	0.728025
NEFA C18:1	736	-0.0352714	0.0272127	0.195345	0.522584	691	-0.0377596	0.0284137	0.184328	0.656491	676	-0.0387876	0.0288687	0.179552	0.700439	676	-0.0395471	0.0288725	0.171251	0.681032
NEFA C18:2	736	0.0266591	0.027963	0.340725	0.663654	691	0.0278666	0.0293767	0.343172	0.703165	676	0.0231897	0.0298126	0.436941	0.755694	676	0.0217445	0.02975	0.4651	0.780716
NEFA C18:3	735	-0.00617978	0.0351769	0.860597	0.946657	690	-0.0081708	0.0368077	0.824393	0.947303	676	-0.013489	0.0375411	0.719478	0.939578	676	-0.0148354	0.037516	0.692647	0.919722
NEFA C20:0	580	0.000792709	0.0228137	0.972294	0.996324	551	0.0117949	0.0230472	0.609026	0.886993	540	0.0174819	0.0234478	0.456268	0.763729	540	0.0171494	0.023471	0.465317	0.780716
NEFA C20:1	736	-0.036579	0.0225898	0.105829	0.456334	691	-0.0315896	0.0233712	0.176947	0.656491	676	-0.030152	0.0237266	0.204252	0.700439	676	-0.0303719	0.023749	0.201402	0.681032
NEFA C20:2	643	0.0407263	0.0271351	0.133893	0.469621	606	0.0527319	0.0276315	0.0568308	0.545613	593	0.0533324	0.0280866	0.0580903	0.56261	593	0.0519414	0.027961	0.0637384	0.577401
NEFA C20:3	694	0.0290987	0.0237101	0.220148	0.522584	656	0.0241437	0.0246266	0.327268	0.697949	643	0.0254851	0.0250956	0.310257	0.700439	643	0.0252199	0.0250898	0.315201	0.681032
NEFA C20:4	736	0.0391879	0.0227719	0.0857023	0.442836	691	0.0380272	0.023693	0.10897	0.656491	676	0.0402686	0.0241635	0.0960958	0.643414	676	0.0395637	0.0241366	0.101667	0.635049
NEFA C22:0	604	0.0100952	0.035334	0.775204	0.911608	573	0.0255918	0.0359294	0.476594	0.796866	561	0.0331481	0.0366846	0.366614	0.749242	561	0.0330168	0.0367192	0.368966	0.720691
NEFA C22:1	646	0.0118494	0.0272845	0.664226	0.901449	608	0.013249	0.0279674	0.635869	0.897951	596	0.0139039	0.0284494	0.625225	0.88089	596	0.0139233	0.0284555	0.624817	0.876421
NEFA C22:2	635	0.00482287	0.0231156	0.834797	0.933008	598	0.0115936	0.023673	0.624503	0.893981	586	0.0115913	0.0241086	0.63085	0.88089	586	0.0115837	0.0241287	0.631359	0.879694
NEFA C22:6	736	0.00726768	0.022537	0.747186	0.911608	691	0.012147	0.0232907	0.602164	0.886993	676	0.01422	0.0237727	0.549938	0.838957	676	0.0114047	0.0232723	0.624262	0.876421
NEFA C24:1	695	-0.00578574	0.0175673	0.741995	0.911608	657	-0.00258547	0.0178136	0.884646	0.975134	644	-0.00104025	0.0180777	0.954131	0.989625	644	-0.00100129	0.0180936	0.955886	0.982547
NEFA C16:2	671	-0.0203909	0.0317026	0.520325	0.80554	629	-0.0167324	0.0328911	0.611134	0.886993	616	-0.0191419	0.0333161	0.565811	0.856917	616	-0.0224868	0.0331635	0.498002	0.793216
NEFA C16:3	589	0.000718065	0.0299198	0.980861	0.996324	555	0.00816764	0.031341	0.794498	0.947303	545	0.00303768	0.0318324	0.924012	0.975346	545	0.00359406	0.0316178	0.909542	0.974842
NEFA C18:4	660	-0.0474234	0.0395426	0.230854	0.522584	618	-0.0449977	0.0412429	0.275698	0.685958	605	-0.0461719	0.0419725	0.271767	0.700439	605	-0.0497876	0.041732	0.233347	0.681032
NEFA C19:1	736	-0.0220445	0.0256193	0.389821	0.675469	691	-0.0169012	0.0262133	0.519308	0.839678	676	-0.0210208	0.0266962	0.431331	0.755694	676	-0.0219647	0.0266796	0.410655	0.747311
NEFA C20:5	668	0.0284835	0.035793	0.426447	0.709874	626	0.0356229	0.0372229	0.338943	0.703165	611	0.0371878	0.0377939	0.32554	0.701421	611	0.0372772	0.0370861	0.315239	0.681032
NEFA C22:3	565	-0.0088339	0.0257082	0.731263	0.909726	534	7.11745e-05	0.0259628	0.997814	0.999663	523	0.003737	0.0263299	0.887192	0.972677	523	0.00355913	0.0263827	0.892742	0.971787
NEFA C22:4	736	0.00569838	0.020473	0.780834	0.9117	691	0.00749635	0.0212446	0.724306	0.927042	676	0.00991348	0.0216178	0.64669	0.889199	676	0.00835512	0.0214674	0.697256	0.919722
NEFA C22:5	737	0.00511015	0.0232846	0.82635	0.933008	692	0.00140433	0.0240824	0.953516	0.979221	677	0.00275922	0.0245449	0.910529	0.975346	677	0.00111447	0.0244	0.963583	0.982547
NEFA C24:2	540	0.0225064	0.0205151	0.273116	0.564975	505	0.0249098	0.0216313	0.250071	0.685958	494	0.0265701	0.0219622	0.226959	0.700439	494	0.0227935	0.0218193	0.296724	0.681032
NEFA C24:3	561	-0.00413738	0.0216788	0.848715	0.938994	530	0.00169248	0.0222648	0.939436	0.979221	518	0.00267276	0.0225561	0.905725	0.975346	518	0.00240376	0.0226032	0.915351	0.976063
NEFA C24:4	737	-0.00636885	0.0204094	0.75509	0.911608	692	-0.00777975	0.0211045	0.71252	0.923664	677	-0.00535307	0.021508	0.803526	0.942018	677	-0.00686835	0.0213652	0.747955	0.919722
NEFA C26:0	605	0.0103109	0.0268985	0.701616	0.909726	577	0.0254362	0.0276613	0.358203	0.708486	565	0.0296707	0.0282259	0.293643	0.700439	565	0.0283183	0.02822	0.316077	0.681032
NEFA C26:3	637	-0.00140155	0.0195561	0.942889	0.985319	598	0.000997049	0.0201128	0.96048	0.979221	585	0.00341157	0.0203735	0.867075	0.969084	585	0.00327914	0.0203896	0.872291	0.969727
NEFA C26:4	530	0.00725809	0.0205363	0.723912	0.909726	492	0.0120647	0.0215214	0.575343	0.884167	483	0.0147237	0.021738	0.498542	0.789358	483	0.014432	0.0216348	0.505061	0.793667
C14:0	723	-0.0273935	0.015986	0.0870325	0.442836	679	-0.0318837	0.0161094	0.0482023	0.545613	664	-0.0387485	0.0162462	0.0173597	0.377643	664	-0.0396033	0.016193	0.0147199	0.369753
C15:1	725	-0.0173396	0.0273503	0.526293	0.808788	681	-0.0130587	0.027142	0.630585	0.896546	666	-0.01887	0.0273948	0.491183	0.789358	666	-0.0195664	0.0274076	0.475543	0.782586
C16:0	733	-0.000332297	0.0106701	0.975164	0.996324	689	-0.00337604	0.0109865	0.758717	0.938294	674	-0.00379564	0.0112157	0.735152	0.939578	674	-0.00377605	0.0112275	0.736734	0.919722
C16:1 n7	732	-0.0370605	0.0156425	0.0180853	0.179991	689	-0.0390991	0.0160555	0.0151376	0.328288	674	-0.0416304	0.0163158	0.0109483	0.377643	674	-0.0417122	0.0163319	0.010871	0.35949
C17:0	722	0.000123062	0.0171991	0.994293	0.998921	678	-0.000874118	0.0172572	0.959618	0.979221	663	-0.00244067	0.0174654	0.888906	0.972677	663	-0.00403577	0.0173305	0.815935	0.93698
C18:0	733	0.00397531	0.0108657	0.714575	0.909726	689	0.000920081	0.0110826	0.93386	0.979221	674	0.000616335	0.0112899	0.95648	0.989625	674	0.000550203	0.0113013	0.961185	0.982547
C18:1 n9	732	-0.0132415	0.0108586	0.223067	0.522584	688	-0.0162702	0.0112911	0.150055	0.656491	673	-0.0180243	0.0114938	0.117317	0.643414	673	-0.0179846	0.0115056	0.118502	0.635049
C18:1 n7	734	-0.00873084	0.0128521	0.497143	0.781224	690	-0.0133382	0.0130425	0.306828	0.690704	675	-0.014041	0.0132467	0.289546	0.700439	675	-0.013693	0.013249	0.301743	0.681032
C18:2 n6	733	0.0465167	0.0142734	0.00116987	0.081501	689	0.0401685	0.0149039	0.00720906	0.275309	674	0.0376384	0.0152138	0.0136117	0.377643	674	0.0365857	0.0151374	0.0159224	0.369753
C18:3 n6	722	0.0217866	0.0198322	0.272332	0.564975	678	0.0179811	0.0203112	0.376324	0.715016	663	0.0152234	0.0206118	0.46043	0.763729	663	0.0148894	0.0206278	0.470671	0.780716
C18:3 n3	717	-0.0107818	0.0309158	0.727381	0.909726	674	-0.0265135	0.0315278	0.400674	0.745194	659	-0.0292545	0.0319776	0.360614	0.749242	659	-0.0327392	0.0316369	0.301129	0.681032
C20:1 n9	694	0.00585297	0.0269557	0.828169	0.933008	651	-1.17111e-05	0.0276815	0.999663	0.999663	636	0.00239215	0.0282148	0.932461	0.979318	636	0.00134606	0.0282333	0.96199	0.982547
C20:2 n6	720	0.0514523	0.0194754	0.00842353	0.154175	676	0.0444536	0.020218	0.0282407	0.491859	661	0.0453219	0.0205879	0.0280595	0.488703	661	0.0458684	0.0205964	0.0262888	0.457863
C20:3 n9	734	-0.0159127	0.0307943	0.605493	0.8592	690	-0.0154041	0.0312992	0.622768	0.893981	675	-0.0159427	0.0313491	0.611235	0.870427	675	-0.0105309	0.0299951	0.725635	0.919722
C20:3 n6	732	0.0281329	0.0149894	0.0609362	0.363876	688	0.0205337	0.0153387	0.181122	0.656491	673	0.0209837	0.0156989	0.181802	0.700439	673	0.0225943	0.0155882	0.147686	0.661631
C20:4 n6	732	0.010589	0.0122659	0.388262	0.675469	688	0.00648374	0.0124146	0.601654	0.886993	673	0.00691104	0.0126	0.583537	0.864959	673	0.00671756	0.0126101	0.59441	0.856771
C20:3 n3	714	0.025551	0.0213075	0.230867	0.522584	670	0.0208497	0.0219532	0.342593	0.703165	655	0.022305	0.0224115	0.319989	0.700439	655	0.0220229	0.0224341	0.326632	0.689556
C20:5 n3	729	0.0187613	0.0281162	0.504808	0.78735	685	0.0231302	0.0289545	0.424661	0.763975	670	0.022994	0.0294824	0.435716	0.755694	670	0.0204912	0.0292639	0.484037	0.784215
C22:4 n6	716	-0.0117843	0.0166143	0.478379	0.769086	672	-0.0132026	0.0170879	0.440017	0.772803	657	-0.0134421	0.0173965	0.439986	0.755694	657	-0.0132016	0.0174135	0.448653	0.780716
C22:5 n6	734	-0.0341447	0.0218111	0.117905	0.456334	690	-0.0403042	0.0225656	0.0745292	0.545613	675	-0.0414604	0.0227727	0.0691145	0.56261	675	-0.038504	0.0222321	0.0837539	0.625163
C22:5 n3	731	-0.0596058	0.0277574	0.0320916	0.268286	687	-0.0570641	0.0274329	0.0378879	0.503032	672	-0.0560148	0.0277956	0.0442842	0.56261	672	-0.0578975	0.0276999	0.0369848	0.534885
C22:6 n3	734	-0.0203883	0.0167794	0.224727	0.522584	690	-0.0204865	0.016834	0.224036	0.685958	675	-0.0172588	0.0170472	0.31171	0.700439	675	-0.0182735	0.0169885	0.282479	0.681032
AC C10:0	673	0.0135203	0.0267396	0.613288	0.86025	635	0.0164139	0.0278316	0.555571	0.866526	621	0.022443	0.0283776	0.429333	0.755694	621	0.0205754	0.0283838	0.4688	0.780716
AC C10:1	650	-0.00390632	0.0264493	0.882634	0.957366	616	-0.0123509	0.027412	0.652466	0.900228	602	-0.0107276	0.028053	0.702301	0.939578	602	-0.0130689	0.0280809	0.641819	0.882502
AC C12:0	682	-0.0388856	0.0283035	0.169941	0.500249	644	-0.0435004	0.0287847	0.131237	0.656491	631	-0.0391035	0.0292733	0.182113	0.700439	631	-0.0402943	0.0291776	0.167789	0.681032
AC C14:1	733	-0.00345435	0.0246622	0.888647	0.957366	691	-0.009321	0.025605	0.71595	0.923664	676	-0.00620594	0.0259841	0.811308	0.942018	676	-0.00722167	0.025949	0.780869	0.919722
AC C16:0	738	-0.084831	0.0283329	0.00284706	0.0991726	693	-0.0774565	0.0292717	0.00833367	0.275309	678	-0.0668533	0.0296297	0.0243832	0.463281	678	-0.0669209	0.0296591	0.0243809	0.457863
AC C18:1	693	-0.0837171	0.0315026	0.00805907	0.154175	655	-0.0735496	0.0312474	0.0188891	0.358893	642	-0.0612583	0.0311165	0.0494385	0.56261	642	-0.061478	0.0311157	0.0486259	0.534885
AC C2:0	735	0.0105564	0.0217185	0.627076	0.873726	690	-0.00112317	0.0226087	0.960393	0.979221	675	0.00553264	0.02305	0.810385	0.942018	675	0.00432134	0.02295	0.850705	0.9559
AC C3:0	737	-0.0142722	0.0245709	0.561518	0.817635	692	-0.00950124	0.0252064	0.70634	0.922657	677	-0.00328936	0.0254138	0.897056	0.975346	677	-0.00347363	0.0254368	0.891421	0.971787
AC C8:1	736	-0.0343217	0.0378439	0.364749	0.672483	692	-0.036339	0.0398402	0.362036	0.708486	677	-0.0345844	0.0400762	0.388475	0.755694	677	-0.0365314	0.0399607	0.360961	0.718483
H1	719	0.112932	0.064918	0.0823665	0.442836	674	0.096831	0.0666634	0.146836	0.656491	659	0.0943361	0.0680485	0.166142	0.694473	659	0.0960828	0.0680215	0.158285	0.661631
LPCa C14:0	736	-0.0243711	0.0202369	0.228875	0.522584	692	-0.0230279	0.0208234	0.269184	0.685958	677	-0.0218584	0.0211261	0.30121	0.700439	677	-0.0193792	0.0206443	0.348222	0.713825
LPCa C16:0	737	-0.0131289	0.0162027	0.418042	0.704603	692	-0.013926	0.0166384	0.402904	0.745194	677	-0.00803467	0.0169701	0.636043	0.88089	677	-0.00624345	0.0167042	0.7087	0.919722
LPCa C16:1	737	0.00402095	0.021131	0.849138	0.938994	692	0.00203473	0.0213756	0.924193	0.979221	677	0.00708367	0.0218182	0.745537	0.939578	677	0.0116695	0.0203658	0.566846	0.834301
LPCa C18:0	738	-0.00153546	0.0190877	0.935908	0.982938	693	0.00171539	0.0198069	0.931011	0.979221	678	0.00733343	0.0201596	0.716149	0.939578	678	0.00821275	0.0201157	0.683206	0.919722
LPCa C18:1	739	0.0139111	0.0192256	0.469563	0.766708	694	0.00865056	0.019334	0.654711	0.900228	679	0.0151617	0.0196709	0.441123	0.755694	679	0.0189406	0.0185198	0.30682	0.681032
LPCa C18:2	736	0.0677576	0.0219921	0.00214193	0.0982347	691	0.0608701	0.022268	0.00643243	0.275309	676	0.0643988	0.0227143	0.0047229	0.377643	676	0.0681689	0.0220461	0.00207273	0.345101
LPCa C18:3	604	0.0921664	0.035159	0.00898269	0.154175	576	0.086838	0.0358374	0.0157076	0.328288	564	0.0948085	0.0364304	0.00951018	0.377643	564	0.104771	0.0357802	0.00355359	0.345101
LPCa C20:3	736	0.0467568	0.0237501	0.0493716	0.322459	691	0.0332744	0.0240224	0.166473	0.656491	676	0.039028	0.0245689	0.112658	0.643414	676	0.0440956	0.0234276	0.0602558	0.57243
LPCa C20:4	735	0.027309	0.0215831	0.206177	0.522584	690	0.0132312	0.0215741	0.539892	0.848402	675	0.0180854	0.0220386	0.412162	0.755694	675	0.0216566	0.0214944	0.314049	0.681032
LPCa C22:6	668	0.0187361	0.0242589	0.440194	0.724413	629	0.00972496	0.0251251	0.698847	0.922657	616	0.0173372	0.0254718	0.496363	0.789358	616	0.0189388	0.0252101	0.452808	0.780716
LPCe C16:0	692	0.00378122	0.0261651	0.885138	0.957366	654	0.00923258	0.0267011	0.729627	0.927042	641	0.00684134	0.0269605	0.79977	0.942018	641	0.00727883	0.0267732	0.785813	0.919722
LPCe C18:0	733	-0.00996484	0.0261584	0.703359	0.909726	688	0.00694916	0.0267094	0.794808	0.947303	673	0.00937439	0.0267263	0.725887	0.939578	673	0.0094156	0.0267492	0.724957	0.919722
LPCe C18:1	411	0.0351596	0.0349445	0.314949	0.626899	389	0.045579	0.0358303	0.204142	0.685958	383	0.0512813	0.0360297	0.155507	0.686999	383	0.0461385	0.0358383	0.198775	0.681032
PCa C28:2	560	-0.0184864	0.036063	0.608429	0.8592	531	-0.0217515	0.0376459	0.563659	0.872628	521	-0.0206562	0.0380981	0.587933	0.865338	521	-0.0221616	0.0381588	0.561656	0.834301
PCa C30:0	737	0.0308507	0.0238335	0.195934	0.522584	692	0.0219881	0.0247384	0.374419	0.715016	677	0.0201769	0.02521	0.423799	0.755694	677	0.0202549	0.0252362	0.422492	0.747311
PCa C30:2	700	0.0203799	0.0229073	0.373956	0.673765	660	0.0127642	0.0237674	0.591422	0.886993	645	0.0151764	0.0241282	0.529587	0.819879	645	0.0145454	0.0241582	0.547335	0.822971
PCa C32:0	739	0.0321332	0.0205	0.117442	0.456334	694	0.0192944	0.0210983	0.360782	0.708486	679	0.0180011	0.0215864	0.404638	0.755694	679	0.0171929	0.0215608	0.425503	0.747311
PCa C32:1	737	0.0253177	0.0267402	0.344058	0.663654	692	0.00904494	0.0274259	0.741658	0.927042	677	0.0119158	0.0279024	0.669482	0.908583	677	0.0138973	0.0277383	0.616531	0.876421
PCa C32:2	733	0.0302917	0.0216479	0.162161	0.484165	688	0.024045	0.0228068	0.292134	0.690212	673	0.0230838	0.0232778	0.321733	0.700439	673	0.0237112	0.0232862	0.30894	0.681032
PCa C32:3	727	0.0204551	0.0221344	0.355731	0.669109	683	0.0106043	0.0227441	0.641195	0.899394	668	0.0128229	0.0232215	0.581003	0.864959	668	0.0143622	0.0231603	0.535398	0.814986
PCa C34:1	738	0.00679853	0.0184174	0.712135	0.909726	693	-0.00555368	0.0188624	0.76852	0.944828	678	-0.00282356	0.0192431	0.88339	0.972677	678	-0.0022016	0.0192359	0.908914	0.974842
PCa C34:2	736	0.0526541	0.0203097	0.00972033	0.154175	691	0.0390411	0.0212414	0.0665119	0.545613	676	0.0396276	0.0217512	0.0689366	0.56261	676	0.0389524	0.0217489	0.0737599	0.577401
PCa C34:3	738	0.0343915	0.0216902	0.113275	0.456334	693	0.0263961	0.0227682	0.246731	0.685958	678	0.0264241	0.0232086	0.255311	0.700439	678	0.0269086	0.0232192	0.246925	0.681032
PCa C34:4	736	-0.0128461	0.0244725	0.599801	0.8592	692	-0.0195843	0.0256857	0.446056	0.77688	677	-0.0173729	0.0259567	0.503541	0.790966	677	-0.0166282	0.0259597	0.522049	0.808209
PCa C34:5	493	-0.0798407	0.0490275	0.104077	0.456334	465	-0.091926	0.0510647	0.0725083	0.545613	455	-0.0835695	0.0520318	0.108976	0.643414	455	-0.0835921	0.0520911	0.109284	0.635049
PCa C36:1	736	0.0237334	0.018601	0.202396	0.522584	691	0.0138613	0.0191414	0.469225	0.790871	676	0.0156007	0.0194437	0.42264	0.755694	676	0.0163055	0.0194291	0.401649	0.747311
PCa C36:2	735	0.0643213	0.0192718	0.000888696	0.081501	690	0.0523363	0.0201365	0.0095548	0.275309	675	0.0530535	0.020618	0.0102985	0.377643	675	0.0527358	0.0206343	0.0108239	0.35949
PCa C36:3	736	0.041811	0.0196836	0.0339981	0.273293	691	0.0256599	0.0202223	0.204922	0.685958	676	0.0286754	0.0206714	0.165856	0.694473	676	0.0304106	0.0205135	0.138703	0.661631
PCa C36:4	737	0.0156737	0.0182632	0.391061	0.675469	692	0.00261067	0.0186825	0.888908	0.975134	677	0.00679111	0.0189853	0.720681	0.939578	677	0.00645144	0.0189969	0.734265	0.919722
PCa C36:5	738	-0.0107124	0.0234407	0.647809	0.884915	693	-0.00940022	0.0242037	0.697859	0.922657	678	-0.00523952	0.0245583	0.831121	0.944045	678	-0.00727443	0.0243531	0.76526	0.919722
PCa C36:6	673	-0.000762555	0.0338284	0.982023	0.996324	629	0.00461686	0.0352425	0.895817	0.975134	619	0.0110651	0.0355742	0.755878	0.939578	619	0.0102033	0.0355854	0.774421	0.919722
PCa C38:0	733	0.0359253	0.0238774	0.132876	0.469621	689	0.0333119	0.0247245	0.178336	0.656491	674	0.0395679	0.0251179	0.115679	0.643414	674	0.0386097	0.025091	0.124346	0.649709
PCa C38:2	612	-0.0187277	0.0316773	0.554608	0.817635	579	-0.0167325	0.0325925	0.607886	0.886993	568	-0.0146533	0.0329282	0.656491	0.896776	568	-0.0146817	0.0329538	0.656118	0.896266
PCa C38:3	736	0.0424102	0.0186332	0.0231363	0.217589	691	0.0268382	0.0190532	0.159422	0.656491	676	0.0294568	0.019431	0.130015	0.662757	676	0.0306263	0.0193938	0.114784	0.635049
PCa C38:4	737	0.0263022	0.0178742	0.14159	0.470246	692	0.0134951	0.0182715	0.460415	0.782331	677	0.0179366	0.0185309	0.33344	0.711112	677	0.0172092	0.0185047	0.352722	0.715717
PCa C38:5	734	-0.0106987	0.0174283	0.539498	0.817066	689	-0.0193571	0.017862	0.278891	0.685958	674	-0.0152746	0.0180422	0.397529	0.755694	674	-0.0150409	0.0180573	0.405176	0.747311
PCa C38:6	735	-0.0225557	0.020202	0.264581	0.564975	690	-0.0262184	0.0206752	0.205203	0.685958	676	-0.0237505	0.0209952	0.258374	0.700439	676	-0.0250021	0.0209413	0.232949	0.681032
PCa C40:0	572	-0.0801165	0.0323726	0.0136263	0.166992	537	-0.0705275	0.0332452	0.0343614	0.503032	527	-0.0615097	0.0336288	0.0679786	0.56261	527	-0.0614236	0.033626	0.0683417	0.577401
PCa C40:4	698	-0.0389554	0.0222643	0.080623	0.442836	659	-0.0417169	0.0228781	0.0687062	0.545613	646	-0.0367719	0.0231979	0.113444	0.643414	646	-0.0366368	0.023213	0.11501	0.635049
PCa C40:5	738	-0.0331415	0.0257176	0.197926	0.522584	693	-0.0424695	0.0267762	0.113192	0.656491	678	-0.0397898	0.027083	0.142267	0.686999	678	-0.0381939	0.0269793	0.15735	0.661631
PCa C40:6	737	-0.0250636	0.0230669	0.277595	0.564975	692	-0.026575	0.0234718	0.257953	0.685958	678	-0.0238809	0.0238073	0.316191	0.700439	678	-0.0248569	0.0237687	0.29605	0.681032
PCa C42:0	493	-0.0424509	0.0334164	0.204572	0.522584	466	-0.031025	0.0345292	0.369397	0.714851	456	-0.02691	0.0355531	0.449524	0.763729	456	-0.028643	0.0354743	0.419863	0.747311
PCa C42:1	385	-0.0475046	0.0354775	0.181381	0.519296	365	-0.0503226	0.036478	0.168619	0.656491	357	-0.0526331	0.0371775	0.15778	0.686999	357	-0.0529332	0.036838	0.151672	0.661631
PCa C42:5	385	-0.0556378	0.0344944	0.107599	0.456334	364	-0.0513681	0.036478	0.159972	0.656491	357	-0.04088	0.0374486	0.275777	0.700439	357	-0.0473675	0.0374085	0.20631	0.681032
PCa C43:6	689	0.0139395	0.02675	0.602467	0.8592	652	0.0253195	0.027444	0.356576	0.708486	640	0.033336	0.0278851	0.232362	0.700439	640	0.0329459	0.0278745	0.237689	0.681032
PCa C44:12	690	-0.0035236	0.0268197	0.895513	0.959806	651	0.00360059	0.0274604	0.895723	0.975134	638	0.00607653	0.0279879	0.828193	0.944045	638	0.00606874	0.0280124	0.828558	0.939675
PCe C32:0	739	0.0326744	0.0211365	0.122572	0.465775	694	0.0301621	0.022081	0.172405	0.656491	679	0.0284205	0.0225141	0.207277	0.700439	679	0.0289824	0.022515	0.198465	0.681032
PCe C32:1	739	0.0299238	0.0209784	0.154183	0.470246	694	0.0266394	0.0218318	0.222814	0.685958	679	0.0238593	0.0222327	0.283594	0.700439	679	0.0238513	0.0222552	0.284244	0.681032
PCe C32:2	700	0.01641	0.0275756	0.551979	0.817635	660	0.0126469	0.0286686	0.65926	0.900558	645	0.00536653	0.0289221	0.852857	0.958318	645	0.00422159	0.0289354	0.88405	0.971787
PCe C34:0	739	0.0285032	0.0264266	0.281136	0.564975	694	0.0289229	0.0271437	0.287013	0.689491	679	0.0287044	0.0274119	0.295418	0.700439	679	0.0282459	0.0274276	0.303472	0.681032
PCe C34:1	737	0.0188057	0.0199473	0.346116	0.663654	692	0.0155986	0.0208173	0.453935	0.777642	677	0.0186776	0.0211549	0.377619	0.752295	677	0.019426	0.0211424	0.358534	0.718483
PCe C34:2	737	0.0310029	0.019417	0.110774	0.456334	692	0.0251803	0.0203831	0.217135	0.685958	677	0.0240848	0.0207717	0.246678	0.700439	677	0.0239562	0.0207924	0.249679	0.681032
PCe C34:3	737	0.0480491	0.0237678	0.0435873	0.298864	692	0.0450729	0.0249809	0.0716359	0.545613	677	0.0393608	0.025348	0.120953	0.643414	677	0.0374984	0.0251866	0.13702	0.661631
PCe C34:4	623	-0.00116944	0.0458534	0.979661	0.996324	585	-0.00181954	0.0476148	0.969531	0.98365	572	-0.00467587	0.0484431	0.923141	0.975346	572	-0.00482115	0.0485276	0.920898	0.976993
PCe C36:0	590	0.00792424	0.0292966	0.786885	0.913661	554	0.00296005	0.0302884	0.922184	0.979221	543	0.00881313	0.0308603	0.775313	0.942018	543	0.008807	0.0308923	0.775691	0.919722
PCe C36:1	737	-0.00491057	0.022564	0.82778	0.933008	692	0.00250973	0.0233874	0.914574	0.979221	677	0.00239634	0.0237186	0.919556	0.975346	677	0.00183674	0.0237256	0.938316	0.982547
PCe C36:2	736	0.0279868	0.0215792	0.195071	0.522584	691	0.0256511	0.0224806	0.254265	0.685958	676	0.0234356	0.0226843	0.301934	0.700439	676	0.0225739	0.0226634	0.319597	0.68159
PCe C36:3	735	0.0299259	0.0207844	0.150354	0.470246	690	0.0218806	0.021713	0.313956	0.690704	675	0.0250218	0.0221515	0.259074	0.700439	675	0.0260939	0.0220952	0.238047	0.681032
PCe C36:4	737	0.013204	0.0188969	0.484941	0.771975	692	0.00295689	0.0196896	0.880672	0.975134	677	0.0048319	0.019964	0.808833	0.942018	677	0.00537851	0.0199645	0.787705	0.919722
PCe C36:5	737	0.0219846	0.0203686	0.280798	0.564975	692	0.0142081	0.021044	0.499807	0.829045	677	0.0148225	0.0214518	0.489833	0.789358	677	0.0139733	0.0214283	0.514571	0.802577
PCe C36:6	412	-0.138124	0.0865351	0.111246	0.456334	388	-0.187849	0.0904492	0.0385096	0.503032	383	-0.185492	0.0913878	0.0431176	0.56261	383	-0.185492	0.0915397	0.0434646	0.534885
PCe C38:0	734	-0.064431	0.0259642	0.0133103	0.166992	689	-0.069895	0.0266737	0.00898411	0.275309	674	-0.0642431	0.0271041	0.0180691	0.377643	674	-0.0673242	0.0267363	0.0120403	0.35949
PCe C38:2	726	-0.015007	0.0362289	0.678832	0.909461	681	-0.00984919	0.0368465	0.78932	0.947303	666	-0.00867595	0.0374321	0.816784	0.943137	666	-0.00924392	0.0374549	0.805141	0.929694
PCe C38:3	730	-0.0310593	0.0269331	0.249216	0.548274	685	-0.0316514	0.0277202	0.253944	0.685958	670	-0.0297204	0.0282204	0.292667	0.700439	670	-0.0313023	0.0281596	0.266726	0.681032
PCe C38:4	736	-0.000605218	0.01788	0.973007	0.996324	691	-0.00444687	0.0186105	0.811222	0.947303	676	-0.00369054	0.0187448	0.84398	0.953469	676	-0.00406616	0.0187542	0.828422	0.939675
PCe C38:5	736	0.00653914	0.0188426	0.728663	0.909726	691	-0.00143114	0.0196333	0.941913	0.979221	676	0.00213974	0.0199307	0.914537	0.975346	676	0.00230563	0.0199499	0.908028	0.974842
PCe C38:6	737	-0.0024124	0.0202874	0.905379	0.965429	692	-0.00382227	0.0211306	0.85651	0.96427	677	-0.00064843	0.0214176	0.975857	0.992575	677	-0.00154595	0.0213888	0.942402	0.982547
PCe C40:0	734	-0.00645872	0.0191234	0.735658	0.909779	690	-0.00813016	0.0197115	0.680137	0.911209	676	-0.00568088	0.0200196	0.77668	0.942018	676	-0.0066926	0.0199678	0.737605	0.919722
PCe C40:1	633	-0.0358119	0.0321501	0.265756	0.564975	595	-0.0475928	0.0333553	0.15417	0.656491	585	-0.0389472	0.0338651	0.250606	0.700439	585	-0.0387928	0.0338883	0.252812	0.681032
PCe C40:3	571	-0.0121424	0.0397322	0.76002	0.911608	534	-0.0270119	0.0405199	0.505308	0.831569	524	-0.0209082	0.0407851	0.608427	0.870427	524	-0.0205853	0.0407497	0.613666	0.876421
PCe C40:4	731	-0.00547253	0.0226108	0.808825	0.933008	686	-0.0053213	0.023253	0.819061	0.947303	672	0.000498987	0.0235143	0.983076	0.992575	672	-0.000787584	0.0234418	0.973209	0.983415
PCe C40:5	732	-0.0643382	0.0248777	0.00990165	0.154175	687	-0.0700746	0.0253515	0.00586643	0.275309	672	-0.0686543	0.0257706	0.00791335	0.377643	672	-0.0700403	0.0257029	0.0066048	0.345101
PCe C40:6	735	-0.0189516	0.0215784	0.380093	0.675469	690	-0.0142583	0.0218792	0.51483	0.839678	675	-0.0112609	0.0219391	0.60793	0.870427	675	-0.0133929	0.0217425	0.538125	0.814986
PCe C42:1	406	-0.0642469	0.0407342	0.115547	0.456334	382	-0.0678142	0.0426687	0.112859	0.656491	374	-0.079534	0.0427758	0.0638129	0.56261	374	-0.0810712	0.0427398	0.0586654	0.57243
PCe C42:2	581	-0.0448777	0.0387388	0.247162	0.548274	547	-0.0429754	0.0400159	0.283335	0.688569	536	-0.0301672	0.0407755	0.459738	0.763729	536	-0.030044	0.0407853	0.461681	0.780716
PCe C42:3	492	-0.0484613	0.0404326	0.231287	0.522584	465	-0.0492651	0.0420549	0.242047	0.685958	456	-0.0462053	0.0427462	0.280332	0.700439	456	-0.047933	0.042744	0.26274	0.681032
PCe C42:4	673	-0.00957582	0.0272066	0.724976	0.909726	634	-0.017851	0.0278838	0.522288	0.839678	624	-0.0160528	0.0283415	0.571331	0.859052	624	-0.016344	0.0282684	0.563367	0.834301
PCe C42:5	639	-0.0572645	0.0275195	0.0378539	0.282553	601	-0.0578329	0.0278014	0.0379454	0.503032	591	-0.0562962	0.0283447	0.0475012	0.56261	591	-0.0565104	0.0283438	0.0466602	0.534885
PCe C42:6	665	-0.0197268	0.0277844	0.477962	0.769086	627	-0.00673452	0.0284777	0.813137	0.947303	612	-0.00127375	0.0291112	0.965115	0.992575	612	-0.00425055	0.0289576	0.883352	0.971787
SMa C30:1	586	0.0129698	0.0360168	0.718901	0.909726	550	0.0279519	0.0369642	0.449872	0.777052	539	0.0319064	0.0374748	0.394938	0.755694	539	0.0326118	0.0374673	0.384485	0.736942
SMa C32:1	738	0.0184576	0.0187319	0.32478	0.640369	693	0.0214093	0.0194606	0.271669	0.685958	678	0.019771	0.0198198	0.318872	0.700439	678	0.0199561	0.0198382	0.314817	0.681032
SMa C32:2	737	0.00914117	0.0236162	0.698818	0.909726	692	0.0100569	0.0242705	0.67874	0.911209	677	0.00803603	0.0247233	0.745257	0.939578	677	0.00926007	0.0246426	0.707207	0.919722
SMa C33:1	737	0.030377	0.0186918	0.104568	0.456334	692	0.0354088	0.0195386	0.0703976	0.545613	677	0.0335807	0.0197597	0.0897123	0.643414	677	0.0334517	0.0197794	0.0912714	0.635049
SMa C34:0	730	0.0109484	0.0178304	0.53939	0.817066	686	0.0112217	0.0182832	0.539577	0.848402	671	0.00999795	0.0187008	0.593092	0.866826	671	0.0104763	0.0187087	0.575695	0.8414
SMa C34:1	737	0.0223142	0.0154539	0.149195	0.470246	692	0.0213497	0.016102	0.185325	0.656491	677	0.020423	0.0164509	0.214886	0.700439	677	0.0201734	0.016463	0.220878	0.681032
SMa C34:2	739	0.0338554	0.0184673	0.0671756	0.389992	694	0.0293089	0.0191853	0.127065	0.656491	679	0.0302349	0.0195857	0.123141	0.643414	679	0.0308326	0.019577	0.115756	0.635049
SMa C35:1	737	0.0438864	0.0193947	0.0239452	0.217589	692	0.0519076	0.0202377	0.0105381	0.275309	677	0.0490313	0.020488	0.0169861	0.377643	677	0.0485093	0.0204975	0.0182453	0.381327
SMa C36:0	500	0.0342931	0.0226386	0.130469	0.469621	475	0.03233	0.0224108	0.149817	0.656491	467	0.0303166	0.0226437	0.1813	0.700439	467	0.0308237	0.0225976	0.173249	0.681032
SMa C36:1	738	0.0236128	0.0165969	0.155249	0.470246	693	0.018601	0.0171146	0.277495	0.685958	678	0.017867	0.0175164	0.308101	0.700439	678	0.0181099	0.0175295	0.301937	0.681032
SMa C36:2	739	0.0273794	0.0188522	0.146848	0.470246	694	0.0210485	0.0192135	0.273688	0.685958	679	0.0213671	0.0196444	0.27713	0.700439	679	0.0218958	0.019642	0.26537	0.681032
SMa C36:3	671	0.0059033	0.0275724	0.830535	0.933008	636	0.00567444	0.0284487	0.841967	0.958211	623	0.000249734	0.0289328	0.993116	0.993116	623	0.000557826	0.0289669	0.984642	0.986989
SMa C38:1	618	0.0116405	0.0195594	0.551977	0.817635	580	0.0040333	0.0204329	0.843592	0.958211	570	0.00468349	0.0207438	0.821459	0.943324	570	0.00441012	0.0207502	0.83177	0.939675
SMa C38:2	737	0.045476	0.01883	0.0159801	0.166992	692	0.0312912	0.019466	0.108422	0.656491	677	0.0313742	0.019914	0.11563	0.643414	677	0.0316021	0.0199313	0.113329	0.635049
SMa C38:3	724	0.0073681	0.0259321	0.776393	0.911608	681	0.0112125	0.0268132	0.675958	0.911209	666	0.00756336	0.0271591	0.780731	0.942018	666	0.00736184	0.0271944	0.7867	0.919722
SMa C39:1	734	0.0211348	0.0230053	0.358566	0.669109	689	0.0248401	0.0236483	0.293918	0.690212	674	0.0300853	0.0238516	0.207635	0.700439	674	0.0292338	0.0238355	0.220465	0.681032
SMa C40:1	677	0.00759265	0.0187932	0.686335	0.909726	634	0.00153929	0.0196	0.937428	0.979221	622	0.000619182	0.0199476	0.975248	0.992575	622	0.000650119	0.0199425	0.974005	0.983415
SMa C40:2	738	0.0231436	0.0193694	0.232538	0.522584	693	0.0157987	0.0200647	0.431335	0.763975	678	0.0174992	0.0203953	0.391206	0.755694	678	0.0174542	0.0204166	0.392918	0.739819
SMa C40:3	451	0.0405452	0.0305613	0.185302	0.522584	423	0.0367911	0.0317151	0.246713	0.685958	415	0.0335331	0.0320591	0.296212	0.700439	415	0.0329664	0.0321347	0.305577	0.681032
SMa C40:4	728	0.0163704	0.019549	0.402646	0.688876	684	0.00198226	0.0199494	0.920879	0.979221	669	0.0063816	0.0202663	0.75295	0.939578	669	0.00609291	0.0202862	0.764009	0.919722
SMa C40:5	664	-0.0123766	0.0267709	0.64401	0.884915	625	-0.00919662	0.0275799	0.738908	0.927042	612	-0.00760053	0.0279585	0.785833	0.942018	612	-0.00920756	0.0277704	0.74034	0.919722
SMa C41:1	736	0.0023096	0.0215885	0.914832	0.965656	691	-0.000138091	0.0223274	0.995067	0.999663	676	-0.000595964	0.0227326	0.979093	0.992575	676	-0.00124802	0.0227335	0.956237	0.982547
SMa C41:2	736	0.010634	0.02267	0.639155	0.884658	692	0.0148097	0.0236874	0.532043	0.848402	677	0.0173804	0.0239376	0.468057	0.770268	677	0.0168523	0.0239483	0.481875	0.784215
SMa C42:1	738	0.0188038	0.017308	0.277655	0.564975	693	0.0179487	0.0182499	0.32572	0.697949	678	0.0151243	0.0185762	0.415842	0.755694	678	0.0148507	0.0185894	0.424652	0.747311
SMa C42:2	735	0.024674	0.0172953	0.154122	0.470246	690	0.0195544	0.0180474	0.278978	0.685958	675	0.0199465	0.0184404	0.2798	0.700439	675	0.0197781	0.0184577	0.284327	0.681032
SMa C42:3	739	0.026999	0.0217919	0.215768	0.522584	694	0.023171	0.0227025	0.307795	0.690704	679	0.0258761	0.0230041	0.261068	0.700439	679	0.0262622	0.0230173	0.2543	0.681032
SMa C42:4	481	0.0195303	0.023453	0.405415	0.688876	455	0.00424669	0.023978	0.859506	0.96427	447	0.00169431	0.0242811	0.944402	0.9869	447	0.00109805	0.0241413	0.963743	0.982547
SMa C42:5	434	0.0231423	0.0400155	0.563346	0.817635	410	0.0226011	0.0414096	0.585518	0.886993	404	0.0256426	0.0415781	0.537777	0.826436	404	0.0261891	0.0417021	0.530375	0.814986
SMa C42:6	727	-0.0168674	0.0212667	0.427963	0.709874	683	-0.0222217	0.0219141	0.310939	0.690704	669	-0.0199836	0.0222406	0.369243	0.749242	669	-0.0209845	0.022223	0.345386	0.713825
SMa C43:2	689	0.00738917	0.024981	0.76748	0.911608	650	0.00448633	0.0259441	0.862768	0.96427	637	-0.000331675	0.0262008	0.989904	0.993116	637	-0.000427701	0.0262164	0.986989	0.986989
SMa C44:6	435	-0.0614471	0.0355817	0.0849089	0.442836	416	-0.065035	0.03652	0.0757071	0.545613	411	-0.0586089	0.0368961	0.112985	0.643414	411	-0.058856	0.036774	0.110302	0.635049
SMa C21:2	470	-0.0473555	0.0527752	0.370026	0.672483	444	-0.0727662	0.0530858	0.171183	0.656491	436	-0.0667956	0.0543333	0.219631	0.700439	436	-0.0656257	0.0543862	0.228252	0.681032
SMa C31:1	401	0.0717596	0.0489647	0.14358	0.470246	377	0.0559075	0.0506855	0.270754	0.685958	371	0.052114	0.0516486	0.313664	0.700439	371	0.0520577	0.0517258	0.31491	0.681032
SMa C35:2	644	0.00375914	0.026839	0.888656	0.957366	601	0.00662414	0.028243	0.814648	0.947303	588	0.00954381	0.0288636	0.74103	0.939578	588	0.0095025	0.0288867	0.742311	0.919722
SMa C37:2	436	0.0290112	0.032326	0.369984	0.672483	416	0.0263072	0.033223	0.428928	0.763975	410	0.0235245	0.0337116	0.485708	0.789358	410	0.0233545	0.0337435	0.489275	0.786604
SMa C37:3	708	0.0499924	0.0333924	0.134819	0.469621	665	0.0533592	0.0348273	0.125989	0.656491	651	0.056335	0.0354271	0.112303	0.643414	651	0.0563234	0.0354619	0.112729	0.635049
SMa C39:4	516	-0.000515389	0.0319558	0.987139	0.996676	485	-0.0148789	0.0329642	0.651937	0.900228	478	-0.0114409	0.0334477	0.732468	0.939578	478	-0.00950772	0.0334791	0.776547	0.919722
SMa C39:5	684	0.00568546	0.0267847	0.831965	0.933008	646	0.00775322	0.0276886	0.779559	0.947303	633	0.00838336	0.0282212	0.766523	0.942018	633	0.00821311	0.0282427	0.7713	0.919722
SMa C41:5	558	-0.0300137	0.032538	0.356719	0.669109	526	-0.0379494	0.0340282	0.265281	0.685958	519	-0.0308363	0.0341623	0.367155	0.749242	519	-0.0310426	0.0342072	0.364592	0.718864
SMa C43:0	350	0.0035787	0.0322557	0.911723	0.965656	331	-0.0128881	0.0338782	0.703887	0.922657	326	-0.00514941	0.0347407	0.882263	0.972677	326	-0.00576649	0.0344173	0.867051	0.969057

## Sheet: Factor5
	Crude model					Main model					Main model +					Main model ++
	Not Adjusted					Adjusted for city, sex, gestational age, smoking, materanl education, maternal age					Main model, further adjusted for maternal BMI, and maternal gestational weight gain					Main model +, further adjusted for birth weight
Metabolite	n	beta	se	p	p_fdr	n	beta	se	p	p_fdr	n	beta	se	p	p_fdr	n	beta	se	p	p_fdr
Ala	736	0.000546174	0.0176063	0.975261	0.996298	691	-0.0204158	0.0187215	0.275887	0.838499	676	-0.0191914	0.018886	0.309926	0.905453	676	-0.0189863	0.0188281	0.313636	0.902124
Arg	737	-0.0575243	0.0333617	0.0850904	0.548983	692	-0.0314116	0.0352018	0.372538	0.888622	677	-0.0411714	0.0357694	0.250146	0.879138	677	-0.0414935	0.0356924	0.245448	0.869654
Asn	736	0.0376633	0.0189175	0.0468684	0.466452	691	0.00718688	0.0197836	0.716515	0.960627	676	0.00350068	0.0200347	0.861345	0.985868	676	0.00360064	0.0200447	0.857499	0.98497
Asp	734	0.0168977	0.0293842	0.565431	0.873165	689	-0.0176566	0.0301764	0.558672	0.909971	674	-0.0213539	0.0306642	0.486442	0.942558	674	-0.0211081	0.0306592	0.491401	0.947978
Cit	729	0.0364804	0.0209432	0.0819633	0.548983	684	0.0335244	0.0226453	0.139241	0.687903	670	0.0292044	0.0228372	0.201426	0.8604	670	0.0291283	0.0228457	0.202768	0.864869
Gln	715	-0.00043652	0.0279048	0.987524	0.996298	674	-0.0439685	0.0297909	0.140455	0.687903	660	-0.032794	0.0296869	0.269726	0.879138	660	-0.0327818	0.0297108	0.270289	0.869654
Glu	671	-0.00575169	0.0194945	0.768055	0.904486	629	-0.0121371	0.0210635	0.564684	0.909971	616	-0.0229926	0.02108	0.275837	0.879138	616	-0.0229885	0.0210977	0.276325	0.869654
Gly	738	0.0252075	0.0169564	0.137556	0.57714	693	-0.00101665	0.0179268	0.954792	0.981934	678	-0.00212483	0.0181361	0.906769	0.985868	678	-0.00212925	0.0181502	0.906649	0.98497
His	737	0.00689777	0.0158538	0.663631	0.886171	692	0.00350418	0.0170329	0.837065	0.968443	677	-0.00192606	0.0171077	0.910395	0.985868	677	-0.0021439	0.0169643	0.899473	0.98497
Ile	735	-0.0296843	0.014295	0.0381979	0.399168	690	-0.0403402	0.0156132	0.00998604	0.347847	675	-0.0399258	0.015769	0.0115794	0.492126	675	-0.0400299	0.0157576	0.0113067	0.471212
Leu	736	-0.00578932	0.0142022	0.683662	0.887487	691	-0.015936	0.0152811	0.297392	0.846736	676	-0.0155292	0.0154629	0.315616	0.905453	676	-0.0155338	0.0154749	0.315848	0.902124
Lys	610	0.000644586	0.0150229	0.96579	0.996298	573	-0.00860535	0.0160797	0.59275	0.924513	560	-0.0114263	0.0162768	0.482982	0.942558	560	-0.011426	0.0162917	0.483394	0.947978
Met	736	0.027563	0.0167958	0.101222	0.548983	691	0.00994697	0.0176469	0.573171	0.909971	676	0.00821887	0.0178353	0.645082	0.980978	676	0.00828957	0.0178404	0.642337	0.97595
Orn	736	0.0480707	0.021962	0.0289315	0.335927	691	0.0169559	0.0221307	0.443848	0.888622	676	0.0121994	0.022421	0.586555	0.957735	676	0.0122353	0.0224363	0.585711	0.947978
Phe	738	0.0176057	0.0135183	0.193207	0.671322	693	0.00878874	0.0142381	0.537269	0.909273	678	0.0103426	0.014427	0.473699	0.942558	678	0.0104042	0.0144282	0.471105	0.947978
Pro	737	-0.00202825	0.0148237	0.891207	0.968604	692	-0.0164135	0.015951	0.303853	0.846736	677	-0.0206976	0.0161469	0.200358	0.8604	677	-0.0206868	0.0161592	0.200937	0.864869
Trp	733	0.00886422	0.0131696	0.501112	0.860891	688	0.0128387	0.0143993	0.372921	0.888622	673	0.0110105	0.014592	0.450787	0.942558	673	0.0110078	0.0145974	0.451067	0.947978
Ser	736	0.0204201	0.0187084	0.275422	0.75741	691	0.00195079	0.0195232	0.920437	0.978522	676	0.000514334	0.0198582	0.979345	0.996663	676	0.000545369	0.0198722	0.978114	0.994877
Thr	736	-0.000944302	0.0163963	0.954089	0.996298	691	0.00162791	0.0178589	0.927398	0.978522	676	-0.00755346	0.0178142	0.671696	0.981558	676	-0.00764118	0.0178052	0.667954	0.97595
Tyr	735	0.00834009	0.0136485	0.541352	0.873165	690	0.00264028	0.0145189	0.855755	0.968443	675	0.00446153	0.0146294	0.760487	0.981558	675	0.00445323	0.0146407	0.761098	0.97595
Val	734	-0.00161686	0.0118515	0.891523	0.968604	689	-0.00774022	0.0128268	0.54642	0.909273	674	-0.00764337	0.0129936	0.556576	0.942558	674	-0.00761461	0.0130022	0.558323	0.947978
NEFA C12:0	736	0.0529859	0.0414273	0.201308	0.671322	691	0.028914	0.045212	0.522705	0.909273	676	0.0201021	0.0452181	0.656788	0.980978	676	0.0202351	0.0451971	0.654515	0.97595
NEFA C14:0	736	0.0223332	0.0367696	0.54379	0.873165	691	-0.00944763	0.040041	0.813545	0.960627	676	-0.016848	0.0406297	0.678519	0.981558	676	-0.0166882	0.040631	0.681409	0.97595
NEFA C14:1	738	0.000213362	0.0433735	0.996076	0.996298	693	-0.0349997	0.0470574	0.457279	0.888622	678	-0.0387223	0.0478137	0.418319	0.942558	678	-0.038203	0.0477841	0.424298	0.947978
NEFA C15:0	734	0.0573685	0.031638	0.070208	0.548983	690	0.0103482	0.0339725	0.760762	0.960627	675	-0.000291334	0.0344155	0.993248	0.996663	675	-0.00012878	0.0344043	0.997015	0.997015
NEFA C15:1	637	0.0657432	0.0413335	0.11222	0.548983	599	0.00626205	0.0443111	0.887667	0.968443	587	-0.00327988	0.0448796	0.941767	0.989092	587	-0.00204867	0.0448791	0.963607	0.994877
NEFA C16:0	736	-0.0176261	0.0215263	0.413163	0.814633	691	-0.0316868	0.023357	0.175359	0.731442	676	-0.0307552	0.0237508	0.195812	0.8604	676	-0.0305185	0.023655	0.19746	0.864869
NEFA C16:1	739	-0.033891	0.0373889	0.365004	0.799417	694	-0.0623101	0.0406335	0.125635	0.687903	679	-0.0598597	0.0411799	0.146536	0.8604	679	-0.0593713	0.0411358	0.149418	0.864869
NEFA C17:0	734	0.0201573	0.0214122	0.346822	0.785493	690	-0.00809167	0.0227567	0.722273	0.960627	675	-0.0132151	0.0230997	0.567461	0.942558	675	-0.0130185	0.0229999	0.571573	0.947978
NEFA C17:1	735	0.00616327	0.0289434	0.831433	0.929052	691	-0.027009	0.031158	0.386342	0.888622	676	-0.0301286	0.031621	0.341045	0.905453	676	-0.0299848	0.0316141	0.343247	0.902124
NEFA C18:0	733	-0.00280411	0.0182323	0.877812	0.965593	688	-0.00699026	0.0197469	0.723457	0.960627	673	-0.0069469	0.0201645	0.730573	0.981558	673	-0.00639126	0.020072	0.750272	0.97595
NEFA C18:1	736	-0.047273	0.0274988	0.0860293	0.548983	691	-0.0615426	0.0299946	0.0405813	0.498911	676	-0.0595913	0.0303993	0.0503902	0.592271	676	-0.0594628	0.0303967	0.0508685	0.626243
NEFA C18:2	736	-0.0325012	0.028274	0.25073	0.740798	691	-0.0400952	0.0310501	0.197046	0.777031	676	-0.0419002	0.031414	0.182735	0.8604	676	-0.0416447	0.0313378	0.18435	0.864869
NEFA C18:3	735	-0.0546817	0.0355177	0.124109	0.55189	690	-0.0711939	0.0388301	0.0671798	0.594306	676	-0.0731322	0.039493	0.0645125	0.612869	676	-0.0728982	0.0394567	0.0651239	0.648138
NEFA C20:0	580	0.0165086	0.0229505	0.472245	0.851865	551	0.0136281	0.0243747	0.576324	0.909971	540	0.0163181	0.0247385	0.50979	0.942558	540	0.0163265	0.0247544	0.509844	0.947978
NEFA C20:1	736	-0.0308707	0.0228603	0.177312	0.660633	691	-0.0478802	0.0246809	0.0528059	0.525545	676	-0.047701	0.0249847	0.0566767	0.592271	676	-0.0476661	0.0250018	0.0570274	0.648138
NEFA C20:2	643	-0.00929545	0.0272277	0.732919	0.892392	606	-0.0151341	0.0295836	0.609146	0.943048	593	-0.0136634	0.0299685	0.648619	0.980978	593	-0.0112472	0.0298417	0.706392	0.97595
NEFA C20:3	694	0.000386624	0.0237449	0.987014	0.996298	656	0.00460456	0.0259903	0.859436	0.968443	643	0.00165139	0.026439	0.950217	0.990111	643	0.00204839	0.0264336	0.938257	0.990383
NEFA C20:4	736	-0.0239242	0.0229971	0.298544	0.768734	691	-0.0207215	0.0250083	0.407638	0.888622	676	-0.0253962	0.0254277	0.318282	0.905453	676	-0.0251761	0.0253943	0.321856	0.902124
NEFA C22:0	604	0.00846111	0.0348797	0.808416	0.91694	573	-0.00952733	0.0372469	0.79821	0.960627	561	-0.00923363	0.0379464	0.80784	0.981558	561	-0.00913517	0.0379805	0.810017	0.97595
NEFA C22:1	646	-0.0157722	0.0271495	0.561491	0.873165	608	-0.0317984	0.0292407	0.277278	0.838499	596	-0.0315192	0.0296964	0.288967	0.901405	596	-0.0319053	0.0297052	0.283249	0.870573
NEFA C22:2	635	-0.0197197	0.0230933	0.393482	0.807538	598	-0.0197757	0.0248462	0.426404	0.888622	586	-0.017503	0.0252865	0.489107	0.942558	586	-0.0174145	0.0253099	0.491707	0.947978
NEFA C22:6	736	-0.0110331	0.0228253	0.62898	0.883734	691	-0.0237991	0.0246611	0.334873	0.864054	676	-0.0231428	0.0250977	0.356815	0.905453	676	-0.0225914	0.0245615	0.358025	0.902124
NEFA C24:1	695	-0.0318793	0.0176623	0.0715293	0.548983	657	-0.0277071	0.0188233	0.14153	0.687903	644	-0.0267699	0.0190735	0.160968	0.8604	644	-0.0268184	0.0190903	0.16058	0.864869
NEFA C16:2	671	-0.031842	0.0322393	0.323677	0.768734	629	-0.0560299	0.0349581	0.109508	0.67315	616	-0.0528476	0.0353416	0.135362	0.8604	616	-0.0526712	0.0351587	0.134644	0.864869
NEFA C16:3	589	-0.0216926	0.0301959	0.472805	0.851865	555	-0.0318155	0.0329371	0.334508	0.864054	545	-0.0309411	0.0334789	0.355812	0.905453	545	-0.029234	0.0332607	0.379842	0.902124
NEFA C18:4	660	-0.0716668	0.0399678	0.0734254	0.548983	618	-0.112383	0.0434684	0.00996438	0.347847	605	-0.116098	0.0441464	0.00876983	0.492126	605	-0.116724	0.0438756	0.00802331	0.471212
NEFA C19:1	736	0.0147107	0.0259192	0.570513	0.873165	691	-0.0066627	0.02773	0.810194	0.960627	676	-0.0111209	0.0281657	0.693091	0.981558	676	-0.0109574	0.0281417	0.697134	0.97595
NEFA C20:5	668	-0.0572971	0.0362085	0.114038	0.548983	626	-0.0785632	0.0395157	0.0472468	0.519714	611	-0.0770222	0.0399004	0.0540443	0.592271	611	-0.0696515	0.0392036	0.0761434	0.691912
NEFA C22:3	565	0.00295614	0.0253209	0.907103	0.972229	534	-0.00651249	0.0267022	0.807411	0.960627	523	-0.00352783	0.026986	0.896043	0.985868	523	-0.00352909	0.0270125	0.896108	0.98497
NEFA C22:4	736	-0.0301309	0.0207003	0.145947	0.586595	691	-0.0277107	0.0224626	0.217774	0.829261	676	-0.0271829	0.022796	0.233524	0.879138	676	-0.0268544	0.0226311	0.235814	0.869654
NEFA C22:5	737	-0.0318246	0.0235395	0.176812	0.660633	692	-0.0283941	0.0254637	0.265217	0.838499	677	-0.0291511	0.0258809	0.26043	0.879138	677	-0.0288135	0.0257219	0.263046	0.869654
NEFA C24:2	540	-0.0083712	0.0200237	0.676071	0.886171	505	-0.00307515	0.0217892	0.887825	0.968443	494	-0.00457987	0.0220253	0.835369	0.985868	494	-0.00589109	0.0218398	0.787478	0.97595
NEFA C24:3	561	0.00937382	0.0225952	0.678408	0.886171	530	-0.00432043	0.0240732	0.857639	0.968443	518	-0.00477212	0.0243372	0.844625	0.985868	518	-0.00501249	0.0243773	0.837171	0.97595
NEFA C24:4	737	-0.0135578	0.0206537	0.511753	0.860891	692	-0.00766169	0.022336	0.731692	0.960627	677	-0.00541287	0.0227006	0.811611	0.981558	677	-0.00510223	0.0225454	0.821032	0.97595
NEFA C26:0	605	-0.0108841	0.0271612	0.688769	0.888598	577	-0.0113883	0.0298656	0.703113	0.960627	565	-0.0086382	0.0303568	0.776094	0.981558	565	-0.00820021	0.0303311	0.786989	0.97595
NEFA C26:3	637	0.0085205	0.0198502	0.667898	0.886171	598	0.00961564	0.0212161	0.650559	0.960627	585	0.00937487	0.0214157	0.661731	0.980978	585	0.00912959	0.0214373	0.670364	0.97595
NEFA C26:4	530	0.00842005	0.0214561	0.694901	0.888794	492	0.0198236	0.0235331	0.400008	0.888622	483	0.0215466	0.0236739	0.363226	0.905453	483	0.0240077	0.0235781	0.30911	0.902124
C14:0	723	0.0431838	0.0160315	0.00723093	0.173681	679	0.0297461	0.0170792	0.0820274	0.612276	664	0.0257492	0.0172392	0.135752	0.8604	664	0.0262128	0.0171822	0.1276	0.864869
C15:1	725	0.0616675	0.0273191	0.0242865	0.317243	681	0.041087	0.0285579	0.150693	0.715792	666	0.0328749	0.0288199	0.254412	0.879138	666	0.0331945	0.028825	0.249911	0.869654
C16:0	733	-0.000239545	0.0107364	0.982206	0.996298	689	0.000605703	0.0116197	0.958443	0.981934	674	-0.00138448	0.0118475	0.907008	0.985868	674	-0.00139493	0.0118571	0.906385	0.98497
C16:1 n7	732	0.0202538	0.0157797	0.199711	0.671322	689	0.015805	0.0170411	0.354015	0.880824	674	0.016428	0.0172972	0.342585	0.905453	674	0.0164565	0.0173107	0.342126	0.902124
C17:0	722	0.0175059	0.017144	0.307547	0.768734	678	0.0111067	0.0181058	0.539798	0.909273	663	0.00445069	0.0183116	0.808041	0.981558	663	0.00514098	0.018165	0.777254	0.97595
C18:0	733	-0.00523767	0.0109325	0.632015	0.883734	689	-0.00343747	0.0117199	0.769381	0.960627	674	-0.00575743	0.0119229	0.629335	0.980978	674	-0.00572682	0.0119321	0.631422	0.97595
C18:1 n9	732	-0.0120265	0.0109332	0.271695	0.757123	688	-0.0111837	0.0119525	0.34977	0.880747	673	-0.0117181	0.0121555	0.335386	0.905453	673	-0.0117415	0.0121649	0.334801	0.902124
C18:1 n7	734	-0.000398924	0.0129259	0.975388	0.996298	690	0.00352469	0.0137948	0.798407	0.960627	675	0.00298979	0.0139959	0.830911	0.985868	675	0.00281703	0.0139946	0.840531	0.97595
C18:2 n6	733	-0.0282461	0.0144283	0.0506462	0.481139	689	-0.0193597	0.0158284	0.221716	0.829261	674	-0.0235255	0.0161178	0.144875	0.8604	674	-0.0230222	0.0160306	0.151433	0.864869
C18:3 n6	722	0.0294	0.0198025	0.138072	0.57714	678	0.0285475	0.0213192	0.181008	0.731442	663	0.0263041	0.021619	0.224155	0.879138	663	0.026472	0.0216296	0.221441	0.869654
C18:3 n3	717	-0.0393844	0.0308648	0.20236	0.671322	674	-0.0583134	0.0331297	0.0788416	0.612276	659	-0.0522842	0.0335752	0.119905	0.8604	659	-0.0508971	0.0332144	0.125917	0.864869
C20:1 n9	694	0.0166362	0.0269815	0.537716	0.873165	651	0.000585519	0.0292607	0.984041	0.993549	636	0.00719894	0.029764	0.808962	0.981558	636	0.0078329	0.0297696	0.792547	0.97595
C20:2 n6	720	0.0020484	0.0195512	0.916586	0.975041	676	-0.006785	0.0213367	0.750587	0.960627	661	-0.00736474	0.0217018	0.734448	0.981558	661	-0.00765064	0.0217067	0.724612	0.97595
C20:3 n9	734	0.0566862	0.0308981	0.066968	0.548983	690	0.045003	0.0330283	0.173472	0.731442	675	0.0411082	0.0330547	0.214071	0.8604	675	0.0381991	0.0316198	0.227448	0.869654
C20:3 n6	732	0.0165773	0.0150637	0.271485	0.757123	688	0.0187187	0.0161825	0.247792	0.838499	673	0.0182503	0.0165535	0.270645	0.879138	673	0.0180143	0.0164331	0.273382	0.869654
C20:4 n6	732	-0.010906	0.0123223	0.376417	0.802767	688	-0.00293857	0.0131113	0.822727	0.966011	673	-0.00584815	0.0132992	0.660271	0.980978	673	-0.00574904	0.0133064	0.665846	0.97595
C20:3 n3	714	0.0180439	0.0213568	0.398463	0.807538	670	-0.00691622	0.0231354	0.765076	0.960627	655	-0.00629816	0.0235965	0.789623	0.981558	655	-0.00615467	0.0236126	0.794445	0.97595
C20:5 n3	729	-0.00945138	0.028142	0.737084	0.892392	685	-0.0411707	0.0304168	0.176332	0.731442	670	-0.0414359	0.0309356	0.180895	0.8604	670	-0.04033	0.0306969	0.189367	0.864869
C22:4 n6	716	0.00754295	0.0166936	0.651516	0.8842	672	0.0125406	0.0180444	0.487308	0.888622	657	0.0125123	0.0183528	0.495632	0.942558	657	0.0123836	0.0183651	0.500361	0.947978
C22:5 n6	734	0.0211642	0.0219537	0.335344	0.778744	690	0.0278788	0.0238722	0.243282	0.838499	675	0.0232754	0.0240779	0.334061	0.905453	675	0.0216771	0.0234978	0.356593	0.902124
C22:5 n3	731	-0.00562412	0.0278984	0.840291	0.929211	687	-0.0215482	0.0289811	0.45742	0.888622	672	-0.0203421	0.0293272	0.488162	0.942558	672	-0.0195701	0.0292245	0.503317	0.947978
C22:6 n3	734	0.0166893	0.0168761	0.323023	0.768734	690	0.00524816	0.0178104	0.768337	0.960627	675	0.00444887	0.0180099	0.804966	0.981558	675	0.00493738	0.0179452	0.783297	0.97595
AC C10:0	673	-0.0437203	0.0273714	0.11068	0.548983	635	-0.0510023	0.0296824	0.0862544	0.621627	621	-0.0503285	0.0301358	0.0954341	0.797829	621	-0.0514322	0.0301132	0.0881658	0.746781
AC C10:1	650	-0.00926514	0.026737	0.729061	0.892392	616	-0.00907066	0.0288802	0.753571	0.960627	602	-0.0101628	0.0294148	0.729845	0.981558	602	-0.0109594	0.0293981	0.709439	0.97595
AC C12:0	682	0.000132323	0.0285093	0.996298	0.996298	644	-0.0219554	0.030553	0.472659	0.888622	631	-0.0195753	0.0309608	0.527455	0.942558	631	-0.0171859	0.0308787	0.578034	0.947978
AC C14:1	733	-0.0146516	0.0248625	0.555844	0.873165	691	-0.0186522	0.0269402	0.488955	0.888622	676	-0.0163557	0.0272653	0.548801	0.942558	676	-0.0161334	0.0272226	0.553625	0.947978
AC C16:0	738	0.00159713	0.0287475	0.95571	0.996298	693	-0.0118	0.0309462	0.703098	0.960627	678	-0.00247091	0.0311889	0.936879	0.989092	678	-0.00246456	0.031213	0.937089	0.990383
AC C18:1	693	0.0319288	0.0315344	0.311658	0.768734	655	0.0158397	0.0329093	0.630461	0.94945	642	0.0354695	0.0326416	0.277623	0.879138	642	0.0361134	0.0326456	0.269061	0.869654
AC C2:0	735	-0.0732751	0.0217504	0.00079505	0.0553885	690	-0.0652048	0.0236732	0.00604122	0.347847	675	-0.0608039	0.024071	0.0117733	0.492126	675	-0.0606926	0.0239605	0.0115433	0.471212
AC C3:0	737	0.0117706	0.024799	0.635186	0.883734	692	0.015951	0.0265494	0.548174	0.909273	677	0.023804	0.026678	0.372579	0.905453	677	0.0238286	0.0266963	0.372413	0.902124
AC C8:1	736	-0.104951	0.03812	0.00605127	0.173681	692	-0.0870369	0.0419076	0.0381951	0.498911	677	-0.0782649	0.0420392	0.0630947	0.612869	677	-0.0775589	0.0419136	0.0647032	0.648138
H1	719	-0.0643119	0.0658214	0.328874	0.772299	674	-0.021522	0.0705795	0.760516	0.960627	659	-0.023262	0.0718125	0.7461	0.981558	659	-0.0239099	0.0717762	0.739157	0.97595
LPCa C14:0	736	0.0522747	0.0203247	0.0103118	0.215517	692	0.0491055	0.021838	0.0248622	0.471474	677	0.0465273	0.0220931	0.0355904	0.592271	677	0.046033	0.0215794	0.0332839	0.579694
LPCa C16:0	737	0.0200362	0.0163263	0.220138	0.707829	692	0.0207535	0.0174965	0.235984	0.838499	677	0.0232894	0.0177751	0.190583	0.8604	677	0.0228791	0.0174912	0.191324	0.864869
LPCa C16:1	737	0.0330021	0.0212486	0.120829	0.548983	692	0.0448398	0.0223901	0.045618	0.519714	677	0.0452588	0.0227811	0.047377	0.592271	677	0.0445561	0.0212555	0.0364492	0.585992
LPCa C18:0	738	0.0190877	0.0192345	0.321352	0.768734	693	0.0115602	0.0208287	0.579073	0.909971	678	0.0115296	0.0211354	0.585588	0.957735	678	0.0113778	0.0210853	0.589651	0.947978
LPCa C18:1	739	-0.01406	0.019392	0.468662	0.851865	694	0.00229758	0.0203414	0.910103	0.975444	679	0.00392435	0.0206356	0.849232	0.985868	679	0.00318233	0.0194303	0.869954	0.98497
LPCa C18:2	736	0.00810336	0.0222735	0.716105	0.890869	691	0.0392136	0.0234722	0.0952627	0.663664	676	0.0362273	0.0238802	0.129742	0.8604	676	0.0354977	0.023196	0.126421	0.864869
LPCa C18:3	604	0.0508521	0.0355822	0.153493	0.605285	576	0.0698189	0.0379634	0.0664337	0.594306	564	0.0737659	0.0384482	0.0555642	0.592271	564	0.0768574	0.0377496	0.0422407	0.588554
LPCa C20:3	736	0.024534	0.0239456	0.30591	0.768734	691	0.0574067	0.0251716	0.0228863	0.471474	676	0.0615716	0.0256532	0.0166691	0.512681	676	0.0605847	0.0244653	0.0135276	0.471212
LPCa C20:4	735	-0.0226221	0.0217089	0.297731	0.768734	690	0.0154027	0.0226438	0.496602	0.89474	675	0.0152942	0.0230555	0.507333	0.942558	675	0.0146851	0.0224837	0.513896	0.947978
LPCa C22:6	668	0.0125588	0.0244431	0.60757	0.88182	629	0.0188059	0.0264117	0.476721	0.888622	616	0.0223057	0.0266754	0.403387	0.940612	616	0.0200143	0.0264099	0.448854	0.947978
LPCe C16:0	692	0.0797432	0.026018	0.00226412	0.1183	654	0.0602184	0.0279505	0.031582	0.471474	641	0.0540395	0.0281723	0.0555509	0.592271	641	0.0524427	0.0279848	0.0614091	0.648138
LPCe C18:0	733	0.033575	0.0262679	0.201602	0.671322	688	0.0139263	0.0279964	0.61905	0.94945	673	0.00244187	0.0279248	0.930345	0.989092	673	0.00242275	0.0279467	0.930943	0.990383
LPCe C18:1	411	0.0867687	0.0350376	0.0136827	0.238306	389	0.0812272	0.0385517	0.0357911	0.498689	383	0.0766571	0.0386916	0.048319	0.592271	383	0.0752269	0.0384104	0.0509384	0.626243
PCa C28:2	560	0.0375514	0.0372624	0.314018	0.768734	531	0.0476784	0.0411235	0.246838	0.838499	521	0.046044	0.0415157	0.267933	0.879138	521	0.0462021	0.0415328	0.266493	0.869654
PCa C30:0	737	0.0374135	0.0240155	0.119699	0.548983	692	0.0424478	0.0259704	0.102633	0.67315	677	0.0387959	0.0263878	0.141986	0.8604	677	0.0387851	0.0264081	0.142403	0.864869
PCa C30:2	700	-0.0153364	0.0230081	0.505275	0.860891	660	-0.0100426	0.0249077	0.686943	0.960627	645	-0.011033	0.0251887	0.66153	0.980978	645	-0.0107119	0.0252043	0.670982	0.97595
PCa C32:0	739	-0.00256963	0.0207124	0.901301	0.970989	694	0.00659459	0.0222069	0.766589	0.960627	679	0.00458493	0.0226467	0.839625	0.985868	679	0.00474577	0.0226135	0.833839	0.97595
PCa C32:1	737	0.024139	0.0269672	0.371021	0.799417	692	0.0308417	0.0288146	0.284849	0.838499	677	0.0269507	0.0292276	0.356821	0.905453	677	0.0265338	0.0290497	0.361375	0.902124
PCa C32:2	733	0.010748	0.0218995	0.623728	0.883734	688	0.024914	0.0240466	0.300545	0.846736	673	0.0222214	0.0244578	0.36392	0.905453	673	0.0218664	0.0244621	0.371714	0.902124
PCa C32:3	727	-0.0054756	0.022283	0.805962	0.91694	683	0.00668614	0.0239127	0.779867	0.960627	668	0.00814542	0.0243202	0.737792	0.981558	668	0.00754731	0.0242486	0.755714	0.97595
PCa C34:1	738	0.00488529	0.0185632	0.792495	0.91694	693	0.00951453	0.0198259	0.631452	0.94945	678	0.00882266	0.0201606	0.661808	0.980978	678	0.00871775	0.0201475	0.665378	0.97595
PCa C34:2	736	-0.00520421	0.0205667	0.800309	0.91694	691	0.00895821	0.0223903	0.689216	0.960627	676	0.00454139	0.0228531	0.842543	0.985868	676	0.00469502	0.022842	0.837212	0.97595
PCa C34:3	738	0.0148837	0.0218921	0.496808	0.860891	693	0.0186087	0.023947	0.437388	0.888622	678	0.0139468	0.0243364	0.566786	0.942558	678	0.0138679	0.0243418	0.569067	0.947978
PCa C34:4	736	0.0233754	0.0246186	0.342684	0.785493	692	0.0211469	0.0269887	0.433585	0.888622	677	0.0170395	0.0271888	0.531069	0.942558	677	0.0168819	0.0271828	0.534785	0.947978
PCa C34:5	493	-0.0198463	0.0474582	0.675999	0.886171	465	-0.0333846	0.0514163	0.51648	0.909273	455	-0.0320703	0.0520493	0.538118	0.942558	455	-0.0322785	0.0521266	0.53609	0.947978
PCa C36:1	736	0.00473121	0.018796	0.801334	0.91694	691	0.00833998	0.0201412	0.678952	0.960627	676	0.00707454	0.0203949	0.728796	0.981558	676	0.00695804	0.0203751	0.73284	0.97595
PCa C36:2	735	-0.0106682	0.0195958	0.586328	0.881601	690	0.00182577	0.0212954	0.931703	0.978522	675	-0.00268527	0.0217294	0.901688	0.985868	675	-0.00260937	0.0217388	0.904495	0.98497
PCa C36:3	736	0.0232893	0.0198841	0.241886	0.740798	691	0.0337094	0.0212503	0.113145	0.675639	676	0.0332854	0.0216566	0.12479	0.8604	676	0.0329098	0.0214896	0.126152	0.864869
PCa C36:4	737	-0.00716439	0.0184198	0.697427	0.888794	692	0.00272561	0.0196405	0.88967	0.968443	677	-0.000604476	0.0198975	0.975774	0.996663	677	-0.000545865	0.019904	0.978129	0.994877
PCa C36:5	738	0.0194811	0.0236175	0.409725	0.814633	693	0.00172853	0.0254455	0.945861	0.979829	678	0.000428853	0.0257335	0.986709	0.996663	678	0.000771136	0.0255123	0.975896	0.994877
PCa C36:6	673	0.0561184	0.0346211	0.105513	0.548983	629	0.0566366	0.0376655	0.133187	0.687903	619	0.0474997	0.0379673	0.211402	0.8604	619	0.0478219	0.037968	0.208335	0.869654
PCa C38:0	733	0.00245298	0.0241302	0.919058	0.975041	689	-0.00626251	0.0260594	0.810159	0.960627	674	-0.0133107	0.0264066	0.614384	0.980978	674	-0.01308	0.0263695	0.620045	0.97595
PCa C38:2	612	0.0478728	0.0317554	0.132199	0.575617	579	0.0490229	0.0344234	0.154972	0.71976	568	0.0521249	0.0346464	0.133038	0.8604	568	0.0525867	0.034688	0.130103	0.864869
PCa C38:3	736	0.0128215	0.0188775	0.497234	0.860891	691	0.0191273	0.0200842	0.34126	0.869798	676	0.0185852	0.0204238	0.363173	0.905453	676	0.0187037	0.0203786	0.35906	0.902124
PCa C38:4	737	-0.0106101	0.0180612	0.557085	0.873165	692	0.000688652	0.0192412	0.97146	0.989804	677	-0.0023616	0.0194618	0.903455	0.985868	677	-0.00220771	0.0194288	0.909566	0.98497
PCa C38:5	734	0.00468575	0.0175545	0.789604	0.91694	689	0.00711021	0.0187811	0.705119	0.960627	674	0.0040197	0.0189071	0.831704	0.985868	674	0.00395634	0.0189175	0.834407	0.97595
PCa C38:6	735	0.0213213	0.0202926	0.293753	0.768734	690	0.00946788	0.0216841	0.662522	0.960627	676	0.00992393	0.0219901	0.65193	0.980978	676	0.0100645	0.021928	0.646402	0.97595
PCa C40:0	572	0.0215059	0.0330016	0.514887	0.860891	537	0.0203062	0.0357822	0.570626	0.909971	527	0.0137919	0.0361027	0.702608	0.981558	527	0.0152194	0.0361234	0.673703	0.97595
PCa C40:4	698	0.0223629	0.0223424	0.317223	0.768734	659	0.0265116	0.0241223	0.272163	0.838499	646	0.0266385	0.0243927	0.275228	0.879138	646	0.0264598	0.0244095	0.278789	0.869654
PCa C40:5	738	0.0221602	0.025953	0.393466	0.807538	693	0.0195435	0.0282184	0.488815	0.888622	678	0.0165066	0.0284417	0.561869	0.942558	678	0.0161039	0.0283225	0.569831	0.947978
PCa C40:6	737	0.0229492	0.023235	0.323632	0.768734	692	0.00691065	0.0246786	0.779544	0.960627	678	0.00810269	0.0249999	0.74596	0.981558	678	0.00830231	0.0249551	0.739476	0.97595
PCa C42:0	493	0.0119229	0.0323809	0.712881	0.890869	466	0.00396337	0.0348532	0.909514	0.975444	456	0.000730101	0.0357005	0.983693	0.996663	456	0.00146935	0.0356139	0.96711	0.994877
PCa C42:1	385	0.0447941	0.0336945	0.184521	0.664912	365	0.0230489	0.0357785	0.519865	0.909273	357	0.028328	0.0362138	0.434622	0.942558	357	0.0332786	0.0359193	0.35486	0.902124
PCa C42:5	385	-0.0147397	0.0347891	0.672036	0.886171	364	-0.0184325	0.0382859	0.630506	0.94945	357	-0.0182264	0.0388505	0.639271	0.980978	357	-0.020903	0.0387126	0.589586	0.947978
PCa C43:6	689	-0.0200252	0.0268171	0.455486	0.851865	652	-0.0211498	0.0289534	0.465372	0.888622	640	-0.0183098	0.0294028	0.533697	0.942558	640	-0.0177391	0.0293931	0.546391	0.947978
PCa C44:12	690	0.0316939	0.0268487	0.238234	0.740798	651	0.0203405	0.0289014	0.481826	0.888622	638	0.0171068	0.0294086	0.560988	0.942558	638	0.0171336	0.0294399	0.560792	0.947978
PCe C32:0	739	0.0334188	0.0213184	0.117413	0.548983	694	0.0318179	0.0232281	0.171208	0.731442	679	0.0273678	0.0236127	0.24687	0.879138	679	0.0272604	0.0236094	0.24866	0.869654
PCe C32:1	739	-0.000419435	0.0211898	0.984213	0.996298	694	0.000317994	0.0229916	0.988969	0.993724	679	-0.00577218	0.0233326	0.804686	0.981558	679	-0.00576839	0.0233506	0.80496	0.97595
PCe C32:2	700	-0.00572411	0.0275897	0.835703	0.929052	660	-0.00839919	0.0299853	0.779484	0.960627	645	-0.0232729	0.0301127	0.439899	0.942558	645	-0.0231213	0.0301074	0.442803	0.947978
PCe C34:0	739	0.0614164	0.0265786	0.0211284	0.294389	694	0.0507745	0.0285108	0.0753841	0.612276	679	0.0378413	0.0287299	0.188255	0.8604	679	0.037935	0.0287387	0.1873	0.864869
PCe C34:1	737	0.0173264	0.0201065	0.389122	0.807538	692	0.0176833	0.0218836	0.419344	0.888622	677	0.0145708	0.0221706	0.511276	0.942558	677	0.0144465	0.0221525	0.514542	0.947978
PCe C34:2	737	0.0101735	0.0196064	0.604	0.88182	692	0.0130773	0.0214469	0.542234	0.909273	677	0.0070683	0.0217882	0.745733	0.981558	677	0.00709265	0.0218038	0.745063	0.97595
PCe C34:3	737	0.0077018	0.0240281	0.748657	0.894111	692	0.0188842	0.0263157	0.473254	0.888622	677	0.0063863	0.0266113	0.810418	0.981558	677	0.00670802	0.0264306	0.799733	0.97595
PCe C34:4	623	0.105262	0.0450184	0.0197004	0.2941	585	0.112198	0.0486775	0.0215348	0.471474	572	0.112369	0.049375	0.0232415	0.558328	572	0.112421	0.0494227	0.0233121	0.571162
PCe C36:0	590	-0.0401022	0.0298857	0.180173	0.660633	554	-0.0496173	0.0325178	0.12764	0.687903	543	-0.0467652	0.0330401	0.157548	0.8604	543	-0.0468985	0.0331079	0.157219	0.864869
PCe C36:1	737	0.0257738	0.0227497	0.25762	0.744564	692	0.0137581	0.0245949	0.576085	0.909971	677	0.00829989	0.0248641	0.73863	0.981558	677	0.00839276	0.0248644	0.735818	0.97595
PCe C36:2	736	0.0300736	0.0217826	0.167825	0.649544	691	0.0253823	0.0236692	0.28394	0.838499	676	0.0136253	0.0238229	0.56756	0.942558	676	0.013785	0.0237929	0.562538	0.947978
PCe C36:3	735	0.0191743	0.0209157	0.359585	0.799417	690	0.0237123	0.0227638	0.297943	0.846736	675	0.0194701	0.0231588	0.400813	0.940612	675	0.0193526	0.0230963	0.40239	0.944939
PCe C36:4	737	0.00443524	0.0190569	0.816032	0.91694	692	0.0160475	0.0206903	0.438257	0.888622	677	0.00861116	0.0209193	0.680742	0.981558	677	0.00851847	0.0209144	0.683921	0.97595
PCe C36:5	737	-0.0108764	0.0205474	0.596738	0.88182	692	0.00387171	0.0221302	0.861171	0.968443	677	-0.00363281	0.0224881	0.871715	0.985868	677	-0.00348652	0.0224564	0.876667	0.98497
PCe C36:6	412	-0.0475435	0.088697	0.592242	0.88182	388	-0.016734	0.0976791	0.86407	0.968443	383	0.00994063	0.0990731	0.920133	0.989092	383	0.00981503	0.0992512	0.92128	0.990383
PCe C38:0	734	0.0445098	0.0262558	0.0904647	0.548983	689	0.0321189	0.0281992	0.255114	0.838499	674	0.029906	0.0285312	0.294946	0.905453	674	0.0306353	0.0281489	0.276855	0.869654
PCe C38:2	726	0.0418454	0.036474	0.251659	0.740798	681	0.0334312	0.0386147	0.386936	0.888622	666	0.0245754	0.0390876	0.529754	0.942558	666	0.0247337	0.0391034	0.527274	0.947978
PCe C38:3	730	0.0444326	0.0272686	0.103661	0.548983	685	0.0390628	0.029237	0.181986	0.731442	670	0.0349011	0.0296766	0.240011	0.879138	670	0.0353715	0.0296044	0.232605	0.869654
PCe C38:4	736	0.0108622	0.0180256	0.546965	0.873165	691	0.0136211	0.0195698	0.486656	0.888622	676	0.00466509	0.0196576	0.812486	0.981558	676	0.00473249	0.0196623	0.809872	0.97595
PCe C38:5	736	-0.0153609	0.0189519	0.41791	0.815145	691	-0.00654543	0.0205929	0.750699	0.960627	676	-0.0129882	0.0208369	0.533288	0.942558	676	-0.0130163	0.0208512	0.532686	0.947978
PCe C38:6	737	0.00966285	0.0204489	0.636688	0.883734	692	0.00722896	0.0222239	0.745072	0.960627	677	0.000137271	0.0224583	0.995125	0.996663	677	0.000296966	0.022422	0.989437	0.997015
PCe C40:0	734	0.0223627	0.0192217	0.245049	0.740798	690	0.0207349	0.0206725	0.316216	0.854015	676	0.0187459	0.020975	0.3718	0.905453	676	0.0189447	0.0209154	0.365389	0.902124
PCe C40:1	633	0.00954506	0.0326802	0.770328	0.904486	595	0.00995573	0.0358046	0.781069	0.960627	585	0.0113947	0.0362939	0.753671	0.981558	585	0.0108916	0.0363298	0.764442	0.97595
PCe C40:3	571	0.0310968	0.0402169	0.439717	0.835463	534	0.0330812	0.0434974	0.447285	0.888622	524	0.0292354	0.0437092	0.503892	0.942558	524	0.0305661	0.0436788	0.484383	0.947978
PCe C40:4	731	0.0380798	0.0227057	0.0939601	0.548983	686	0.0363714	0.0244005	0.136543	0.687903	672	0.0311577	0.0246016	0.205795	0.8604	672	0.031404	0.0245184	0.200713	0.864869
PCe C40:5	732	0.0213402	0.02544	0.401837	0.807538	687	0.0192812	0.027074	0.476614	0.888622	672	0.0171837	0.0274436	0.531442	0.942558	672	0.0176698	0.0273708	0.518786	0.947978
PCe C40:6	735	0.0506523	0.0216377	0.0195088	0.2941	690	0.0368188	0.02293	0.108814	0.67315	675	0.0290282	0.0229334	0.206054	0.8604	675	0.0292584	0.0227208	0.198298	0.864869
PCe C42:1	406	0.0224394	0.0411525	0.585874	0.881601	382	0.0204509	0.0446845	0.647461	0.960627	374	0.0108191	0.0443486	0.807407	0.981558	374	0.0102505	0.0443077	0.817178	0.97595
PCe C42:2	581	0.0270396	0.0396154	0.495168	0.860891	547	0.0107388	0.0430095	0.802929	0.960627	536	0.0229287	0.0437476	0.600426	0.972783	536	0.024169	0.0437784	0.581137	0.947978
PCe C42:3	492	0.0180822	0.039322	0.645834	0.883734	465	0.0257339	0.0426554	0.546617	0.909273	456	0.0189191	0.0431192	0.661052	0.980978	456	0.0183016	0.043102	0.671331	0.97595
PCe C42:4	673	0.00931842	0.0272755	0.732731	0.892392	634	-0.00381667	0.0293709	0.896651	0.970985	624	-0.00217805	0.0297264	0.941616	0.989092	624	-0.000751153	0.0296582	0.979803	0.994877
PCe C42:5	639	0.044236	0.0281542	0.116642	0.548983	601	0.0258105	0.0300538	0.390802	0.888622	591	0.0237893	0.0306249	0.437603	0.942558	591	0.0244108	0.0306291	0.425797	0.947978
PCe C42:6	665	0.0182954	0.0274409	0.505187	0.860891	627	0.00498002	0.0290566	0.863974	0.968443	612	-0.000123616	0.0295448	0.996663	0.996663	612	-0.00071462	0.0293709	0.980597	0.994877
SMa C30:1	586	0.12826	0.0356332	0.000346568	0.0457098	550	0.136372	0.0382624	0.000398131	0.0832094	539	0.141315	0.0385592	0.000273046	0.0570666	539	0.142809	0.0385541	0.000235046	0.0491246
SMa C32:1	738	0.0504231	0.0187984	0.0074791	0.173681	693	0.0483628	0.0203896	0.0179779	0.469674	678	0.0447879	0.0207091	0.0309263	0.5876	678	0.0447592	0.0207231	0.0311472	0.579694
SMa C32:2	737	0.0301012	0.0237754	0.2059	0.672392	692	0.0205828	0.0254883	0.419644	0.888622	677	0.0215644	0.0258819	0.405048	0.940612	677	0.0212766	0.025793	0.409732	0.947978
SMa C33:1	737	0.05494	0.0187723	0.00353442	0.147739	692	0.0513321	0.0204988	0.0125121	0.373574	677	0.0461187	0.0206772	0.0260605	0.558328	677	0.0461429	0.0206916	0.0260863	0.571162
SMa C34:0	730	0.0281633	0.0179546	0.117189	0.548983	686	0.0351175	0.0192281	0.0682456	0.594306	671	0.0358591	0.0195862	0.0675865	0.614156	671	0.0356228	0.0195902	0.0694678	0.659944
SMa C34:1	737	0.0102859	0.0155978	0.509822	0.860891	692	0.0169192	0.0169373	0.318191	0.854015	677	0.0152048	0.0172497	0.3784	0.909031	677	0.0152496	0.0172572	0.377204	0.902124
SMa C34:2	739	-0.00032427	0.0186705	0.986148	0.996298	694	0.0028537	0.020217	0.887791	0.968443	679	0.00123351	0.020575	0.952212	0.990111	679	0.00111884	0.0205625	0.956624	0.994877
SMa C35:1	737	0.0556763	0.0194681	0.00436084	0.151903	692	0.0568487	0.0212236	0.00757608	0.347847	677	0.0511895	0.0214257	0.0171711	0.512681	677	0.0512487	0.0214256	0.0170431	0.508859
SMa C36:0	500	0.0144626	0.0226868	0.524106	0.86935	475	0.0289777	0.0237059	0.222194	0.829261	467	0.0324156	0.0238784	0.175299	0.8604	467	0.0326368	0.023829	0.171494	0.864869
SMa C36:1	738	0.00868577	0.0167521	0.604277	0.88182	693	0.0149422	0.0180032	0.406847	0.888622	678	0.0144315	0.018361	0.43216	0.942558	678	0.0143929	0.0183705	0.433631	0.947978
SMa C36:2	739	-0.00624717	0.0190418	0.742949	0.892392	694	0.00604127	0.0202285	0.765299	0.960627	679	0.00590304	0.0206164	0.774718	0.981558	679	0.00580117	0.02061	0.778437	0.97595
SMa C36:3	671	-0.00906319	0.0273486	0.740453	0.892392	636	0.00885066	0.0296517	0.765432	0.960627	623	0.0109478	0.0300946	0.71615	0.981558	623	0.0108696	0.0301174	0.718298	0.97595
SMa C38:1	618	0.0185468	0.0198099	0.349526	0.785493	580	0.0239839	0.0215592	0.266418	0.838499	570	0.0216077	0.0218483	0.323106	0.905453	570	0.0211003	0.0218612	0.334874	0.902124
SMa C38:2	737	-0.0089	0.0190576	0.640638	0.883734	692	0.00508701	0.0205028	0.804123	0.960627	677	0.00194666	0.0209084	0.925849	0.989092	677	0.00191081	0.0209214	0.927256	0.990383
SMa C38:3	724	-0.00801817	0.0261719	0.759416	0.901807	681	0.00187849	0.0282543	0.947012	0.979829	666	-0.00350431	0.0285099	0.902213	0.985868	666	-0.00347749	0.0285313	0.90303	0.98497
SMa C39:1	734	0.0396075	0.0230979	0.0868206	0.548983	689	0.0271072	0.0247922	0.274626	0.838499	674	0.0250729	0.0249339	0.314997	0.905453	674	0.0252394	0.0249083	0.311301	0.902124
SMa C40:1	677	0.0214865	0.0190616	0.260063	0.744564	634	0.0202323	0.020781	0.330641	0.864054	622	0.0171475	0.0210932	0.416575	0.942558	622	0.0167846	0.0210907	0.426447	0.947978
SMa C40:2	738	0.0155638	0.0195326	0.425824	0.816489	693	0.0237627	0.0210816	0.260072	0.838499	678	0.0216045	0.0213658	0.312311	0.905453	678	0.021614	0.0213822	0.312468	0.902124
SMa C40:3	451	0.0357134	0.0310685	0.250973	0.740798	423	0.0550476	0.0339141	0.105338	0.67315	415	0.04829	0.0341403	0.158017	0.8604	415	0.0483057	0.0341765	0.158324	0.864869
SMa C40:4	728	-0.0158578	0.0197049	0.421223	0.815145	684	-0.00320258	0.0210134	0.878913	0.968443	669	-0.00630888	0.0212635	0.766791	0.981558	669	-0.0061704	0.0212775	0.771913	0.97595
SMa C40:5	664	0.0469837	0.0268615	0.0807449	0.548983	625	0.0340284	0.0288844	0.239227	0.838499	612	0.033734	0.0291756	0.248053	0.879138	612	0.0354816	0.0289764	0.221257	0.869654
SMa C41:1	736	0.046749	0.0216826	0.0314107	0.345518	691	0.0505993	0.0233799	0.0308021	0.471474	676	0.0484546	0.0237305	0.0415686	0.592271	676	0.0485618	0.0237239	0.0410655	0.588554
SMa C41:2	736	0.0334207	0.0228483	0.143981	0.586595	692	0.0370038	0.0248559	0.13703	0.687903	677	0.0335996	0.0250403	0.180124	0.8604	677	0.0336756	0.0250434	0.179195	0.864869
SMa C42:1	738	0.0156425	0.0174532	0.370417	0.799417	693	0.0115772	0.0191991	0.546709	0.909273	678	0.0113482	0.0194704	0.5602	0.942558	678	0.0113951	0.0194789	0.558752	0.947978
SMa C42:2	735	-0.00806468	0.0174486	0.64408	0.883734	690	-0.00164599	0.0189792	0.930916	0.978522	675	-0.00274185	0.0193258	0.887223	0.985868	675	-0.00271824	0.0193383	0.888259	0.98497
SMa C42:3	739	0.0124258	0.0219991	0.572362	0.873165	694	0.0172263	0.0238914	0.471145	0.888622	679	0.0169882	0.0241362	0.48178	0.942558	679	0.016915	0.0241451	0.48383	0.947978
SMa C42:4	481	0.0175252	0.0236899	0.459808	0.851865	455	0.0251915	0.0252362	0.318723	0.854015	447	0.0200884	0.0254767	0.430843	0.942558	447	0.0195512	0.0253303	0.440632	0.947978
SMa C42:5	434	0.0328907	0.0389896	0.399383	0.807538	410	0.000172184	0.0427784	0.996791	0.996791	404	-0.00565237	0.0429044	0.895256	0.985868	404	-0.00524908	0.0430175	0.902946	0.98497
SMa C42:6	727	0.0124988	0.021401	0.559385	0.873165	683	0.000705856	0.0230662	0.975597	0.989804	669	-0.000686322	0.0233646	0.976575	0.996663	669	-0.000211659	0.0233404	0.992767	0.997015
SMa C43:2	689	0.0874744	0.0247524	0.000437414	0.0457098	650	0.0798895	0.0270844	0.00330007	0.344858	637	0.0738052	0.0273071	0.00706718	0.492126	637	0.0740081	0.0273239	0.00694749	0.471212
SMa C44:6	435	0.0140639	0.0369525	0.703695	0.890869	416	-0.00794267	0.0403336	0.843987	0.968443	411	-0.0123631	0.0407007	0.761476	0.981558	411	-0.0111963	0.0405736	0.782733	0.97595
SMa C21:2	470	-0.0186668	0.0510467	0.714772	0.890869	444	0.0166581	0.0537813	0.756912	0.960627	436	0.0131507	0.0546432	0.809933	0.981558	436	0.0118397	0.0546973	0.828737	0.97595
SMa C31:1	401	0.0935645	0.0502921	0.0635782	0.548983	377	0.0953192	0.0546238	0.0818388	0.612276	371	0.088218	0.0556149	0.113587	0.8604	371	0.0891014	0.0558401	0.111469	0.864869
SMa C35:2	644	0.0691791	0.02742	0.0118835	0.225786	601	0.065272	0.0301157	0.0306139	0.471474	588	0.0681899	0.0306955	0.0267143	0.558328	588	0.0679897	0.0307288	0.0273283	0.571162
SMa C37:2	436	0.072034	0.0322502	0.0260293	0.320007	416	0.0679209	0.0349471	0.0526559	0.525545	410	0.0605528	0.0354421	0.0883397	0.769291	410	0.0604216	0.0354752	0.0893278	0.746781
SMa C37:3	708	-0.0247599	0.0336804	0.462502	0.851865	665	-0.00275325	0.0368149	0.940408	0.979829	651	-0.00585088	0.0373387	0.875534	0.985868	651	-0.00584538	0.0373687	0.875749	0.98497
SMa C39:4	516	-0.0547168	0.0316981	0.0849284	0.548983	485	-0.0460062	0.0343689	0.181356	0.731442	478	-0.0445561	0.0348474	0.201686	0.8604	478	-0.0431652	0.0348602	0.216266	0.869654
SMa C39:5	684	0.0122506	0.0267352	0.646944	0.883734	646	0.0262718	0.0291116	0.367166	0.888622	633	0.0168947	0.0295903	0.568241	0.942558	633	0.0171997	0.0296172	0.561637	0.947978
SMa C41:5	558	0.00434762	0.0327544	0.894453	0.968604	526	0.0250095	0.0360651	0.488343	0.888622	519	0.0242029	0.0361236	0.503168	0.942558	519	0.0240645	0.0361662	0.506114	0.947978
SMa C43:0	350	0.00786724	0.0336995	0.81555	0.91694	331	0.00573939	0.0372647	0.877695	0.968443	326	0.00633164	0.0379681	0.867667	0.985868	326	0.00766987	0.0376168	0.838571	0.97595

## Sheet: Factor6
	Crude model					Main model					Main model +					Main model ++
	Not Adjusted					Adjusted for city, sex, gestational age, smoking, materanl education, maternal age					Main model, further adjusted for maternal BMI, and maternal gestational weight gain					Main model +, further adjusted for birth weight
Metabolite	n	beta	se	p	p_fdr	n	beta	se	p	p_fdr	n	beta	se	p	p_fdr	n	beta	se	p	p_fdr
Ala	736	0.00832305	0.0177303	0.638908	0.809089	691	-0.00351485	0.0184604	0.849054	0.939649	676	-0.00489788	0.0188086	0.794633	0.925387	676	-0.00401968	0.018755	0.83036	0.953546
Arg	737	-0.0343373	0.0337566	0.3094	0.598839	692	0.00641072	0.0348789	0.854227	0.939649	677	-0.00510674	0.0358271	0.886699	0.955942	677	-0.0065108	0.0357573	0.855574	0.964087
Asn	736	0.0197107	0.0192012	0.304985	0.598839	691	-0.0123219	0.0196093	0.529978	0.853831	676	-0.0175306	0.0200499	0.382251	0.807696	676	-0.0172299	0.0200658	0.390841	0.793065
Asp	734	0.0201787	0.0296304	0.496084	0.751316	689	-0.0290183	0.0297686	0.330017	0.733761	674	-0.035601	0.0305645	0.244536	0.786279	674	-0.0351237	0.0305624	0.250879	0.793065
Cit	729	-0.010646	0.021266	0.616801	0.809089	684	-0.013484	0.0225858	0.550705	0.853831	670	-0.0149633	0.0230038	0.51562	0.879518	670	-0.015257	0.0230149	0.507621	0.868642
Gln	715	0.00475553	0.0280935	0.865629	0.953033	674	-0.0282591	0.0293359	0.335759	0.738671	660	-0.0259639	0.0295289	0.379588	0.807696	660	-0.0259202	0.0295675	0.381013	0.793065
Glu	671	-0.0112463	0.0194399	0.563115	0.792471	629	-0.0245897	0.020595	0.232959	0.67993	616	-0.0356822	0.0208796	0.0879864	0.521436	616	-0.03567	0.0208974	0.0883659	0.564022
Gly	738	0.0126159	0.0170899	0.460628	0.73654	693	-0.00989869	0.0176552	0.575212	0.853831	678	-0.0116463	0.0180443	0.518879	0.879518	678	-0.0116717	0.0180621	0.518379	0.868642
His	737	-0.00555008	0.0159607	0.728141	0.874607	692	-0.00168207	0.0167681	0.920125	0.96905	677	-0.00501894	0.017013	0.768083	0.919395	677	-0.00627321	0.0168735	0.71018	0.908796
Ile	735	-0.00737867	0.014459	0.609986	0.809089	690	-0.0171836	0.0154921	0.267753	0.67993	675	-0.0163824	0.0158129	0.300584	0.807696	675	-0.0168307	0.0158044	0.287301	0.793065
Leu	736	-0.0152114	0.0143298	0.288809	0.591014	691	-0.0311303	0.0150779	0.0393449	0.328923	676	-0.030886	0.0154189	0.045579	0.488012	676	-0.0309184	0.0154338	0.0455615	0.49369
Lys	610	0.017809	0.0153545	0.246572	0.566923	573	0.00792014	0.016018	0.621184	0.853831	560	0.00800879	0.01636	0.624664	0.908287	560	0.00807078	0.0163799	0.622409	0.895446
Met	736	0.0202252	0.0169148	0.232204	0.566923	691	0.00387629	0.0173764	0.823543	0.939649	676	0.00230321	0.0177417	0.89675	0.959274	676	0.00260721	0.0177505	0.883272	0.964087
Orn	736	0.0444725	0.0221362	0.0449063	0.293294	691	0.0114624	0.0218266	0.599647	0.853831	676	0.00857222	0.0223445	0.701371	0.919395	676	0.00873347	0.0223637	0.696281	0.908796
Phe	738	-0.00898221	0.0136209	0.509821	0.76109	693	-0.0251319	0.0139959	0.0730015	0.476791	678	-0.0242259	0.0143327	0.0914588	0.521436	678	-0.0239512	0.0143377	0.0953007	0.564022
Pro	737	0.00957456	0.0149268	0.521445	0.768797	692	-0.00139913	0.0157289	0.929146	0.970958	677	-0.00658741	0.0160903	0.68238	0.919395	677	-0.00653883	0.0161061	0.684887	0.908796
Trp	733	-0.000107731	0.0132516	0.993516	0.993516	688	0.00174032	0.0141581	0.902207	0.96656	673	0.000122604	0.0144999	0.993256	0.993256	673	-0.000117502	0.0145091	0.993541	0.993864
Ser	736	0.0119993	0.0189142	0.526019	0.768797	691	-0.0138807	0.0193237	0.47281	0.853831	676	-0.0176668	0.0198542	0.373888	0.807696	676	-0.0175477	0.0198721	0.377546	0.793065
Thr	736	0.0304585	0.0165289	0.0657784	0.340942	691	0.0239921	0.0176489	0.174475	0.67993	676	0.0197644	0.0177975	0.267189	0.786513	676	0.0193016	0.0177929	0.278419	0.793065
Tyr	735	0.0067533	0.0137448	0.623339	0.809089	690	0.00348709	0.0143177	0.807654	0.939649	675	0.00375048	0.014573	0.796984	0.925387	675	0.0037151	0.0145873	0.799051	0.927787
Val	734	-0.0127859	0.011948	0.284922	0.591014	689	-0.0216709	0.0126579	0.0873553	0.507146	674	-0.0250923	0.0129491	0.0530873	0.488012	674	-0.0250032	0.0129599	0.0541356	0.49369
NEFA C12:0	736	0.00433553	0.0416365	0.917097	0.966313	691	-0.00209445	0.0443096	0.962313	0.985899	676	-0.0128364	0.044731	0.774227	0.919395	676	-0.0117412	0.0447191	0.792977	0.925972
NEFA C14:0	736	0.0676646	0.0368695	0.0668833	0.340942	691	0.0461044	0.0392386	0.240425	0.67993	676	0.0483797	0.0402144	0.229399	0.786279	676	0.0491687	0.0402214	0.221982	0.76082
NEFA C14:1	738	0.0523317	0.0436478	0.230941	0.566923	693	0.0308778	0.0463249	0.505292	0.853831	678	0.0390764	0.0475218	0.411217	0.826387	678	0.0403615	0.0474976	0.395773	0.795351
NEFA C15:0	734	0.109946	0.0315586	0.000524324	0.0225121	690	0.0800115	0.0331818	0.016166	0.241336	675	0.0771258	0.0339615	0.023476	0.3271	675	0.0779458	0.0339534	0.0220141	0.312828
NEFA C15:1	637	0.0823135	0.0405241	0.0426587	0.293294	599	0.0465534	0.0423693	0.272336	0.67993	587	0.0509304	0.0432045	0.23897	0.786279	587	0.0518451	0.0431966	0.230564	0.777224
NEFA C16:0	736	-0.00895394	0.0216374	0.679131	0.834932	691	-0.0215475	0.0229282	0.347669	0.753042	676	-0.0138213	0.0235554	0.557571	0.879518	676	-0.012684	0.0234654	0.589009	0.888344
NEFA C16:1	739	-0.0156367	0.0376642	0.678147	0.834932	694	-0.0369278	0.0400111	0.356371	0.753042	679	-0.0208283	0.0409485	0.611173	0.901721	679	-0.0194824	0.0409128	0.634096	0.895446
NEFA C17:0	734	0.0759508	0.0213245	0.000392948	0.0225121	690	0.0568007	0.0222261	0.0108226	0.202698	675	0.0570901	0.0227779	0.0124416	0.3271	675	0.0582821	0.0226779	0.0103929	0.307013
NEFA C17:1	735	0.068603	0.0289356	0.0180094	0.222703	691	0.049141	0.0305218	0.107866	0.541406	676	0.0573741	0.0312694	0.0669893	0.521436	676	0.0580905	0.0312659	0.0636299	0.511259
NEFA C18:0	733	-0.0245339	0.0183728	0.18219	0.566923	688	-0.0316242	0.0193841	0.103271	0.539593	673	-0.0281479	0.0199641	0.159045	0.696351	673	-0.027178	0.0198764	0.171993	0.718933
NEFA C18:1	736	-0.0247492	0.0276726	0.37143	0.650461	691	-0.0370468	0.0294807	0.209323	0.67993	676	-0.0228343	0.030194	0.449772	0.857291	676	-0.0222191	0.0301974	0.462121	0.846621
NEFA C18:2	736	-0.0353702	0.0284055	0.213468	0.566923	691	-0.0432935	0.0304501	0.155557	0.650227	676	-0.0363131	0.0311335	0.243895	0.786279	676	-0.0350924	0.0310653	0.259049	0.793065
NEFA C18:3	735	-0.0709249	0.0357741	0.0477962	0.299278	690	-0.0800069	0.0382307	0.0367511	0.325841	676	-0.0764575	0.039116	0.0510559	0.488012	676	-0.0753536	0.0390898	0.0543295	0.49369
NEFA C20:0	580	-0.0155535	0.0225927	0.491465	0.751316	551	-0.0192728	0.0233423	0.409369	0.784936	540	-0.010562	0.0239592	0.659519	0.908287	540	-0.0102071	0.0239832	0.670581	0.908796
NEFA C20:1	736	-0.0190726	0.0229884	0.407007	0.686004	691	-0.0364291	0.0242376	0.133315	0.581803	676	-0.0241838	0.024805	0.329944	0.807696	676	-0.0240216	0.0248266	0.33362	0.793065
NEFA C20:2	643	-0.0129434	0.0276727	0.640139	0.809089	606	-0.0370027	0.0289902	0.202328	0.67993	593	-0.0268163	0.029684	0.366702	0.807696	593	-0.0255374	0.0295477	0.3878	0.793065
NEFA C20:3	694	-0.027771	0.0241785	0.251134	0.566923	656	-0.0316048	0.0257993	0.221022	0.67993	643	-0.0299134	0.0264441	0.258413	0.786513	643	-0.0297984	0.0264368	0.260116	0.793065
NEFA C20:4	736	-0.0280131	0.0232213	0.22808	0.566923	691	-0.0302501	0.0246642	0.220453	0.67993	676	-0.0272149	0.0253108	0.282673	0.807696	676	-0.0265918	0.0252808	0.293257	0.793065
NEFA C22:0	604	0.0250182	0.0365346	0.493752	0.751316	573	0.017787	0.0384865	0.644147	0.853831	561	0.0211329	0.0396536	0.594298	0.900059	561	0.0211902	0.0396879	0.593618	0.888344
NEFA C22:1	646	-0.0325581	0.0282571	0.249672	0.566923	608	-0.0329774	0.029872	0.270066	0.67993	596	-0.0247037	0.0306809	0.421051	0.830185	596	-0.0247417	0.0306874	0.420436	0.813621
NEFA C22:2	635	-0.0140316	0.0238371	0.556314	0.792471	598	-0.0263863	0.0251616	0.29477	0.714386	586	-0.0154936	0.025868	0.54945	0.879518	586	-0.0154945	0.0258894	0.549757	0.868642
NEFA C22:6	736	0.00507786	0.0229233	0.824755	0.935405	691	-0.0134489	0.0241797	0.578257	0.853831	676	-0.00893695	0.0248605	0.71935	0.919395	676	-0.00638667	0.0243347	0.793057	0.925972
NEFA C24:1	695	-0.0209746	0.0178712	0.240947	0.566923	657	-0.0288789	0.0185966	0.120943	0.561714	644	-0.0235337	0.0190091	0.216178	0.778986	644	-0.0235688	0.019025	0.21588	0.76082
NEFA C16:2	671	-0.0368491	0.0320161	0.250171	0.566923	629	-0.0575347	0.0339914	0.0910418	0.510666	616	-0.044931	0.0348353	0.197621	0.771407	616	-0.044505	0.034656	0.19958	0.744861
NEFA C16:3	589	-0.0525157	0.0306141	0.0868099	0.372103	555	-0.0597076	0.0328391	0.0695968	0.469217	545	-0.0567814	0.0335582	0.091238	0.521436	545	-0.0522769	0.0333838	0.117972	0.569911
NEFA C18:4	660	-0.0503504	0.0397324	0.20553	0.566923	618	-0.0732756	0.0423698	0.0842526	0.503109	605	-0.0636106	0.0436864	0.145915	0.66296	605	-0.0636335	0.0434231	0.143349	0.651302
NEFA C19:1	736	0.0792812	0.0258809	0.00227104	0.0527387	691	0.059543	0.0271043	0.0283783	0.294829	676	0.0614824	0.0278039	0.0273641	0.357444	676	0.0622941	0.027782	0.0252836	0.330267
NEFA C20:5	668	0.0112044	0.0359061	0.755105	0.896687	626	-0.0159139	0.0379535	0.675147	0.853831	611	-0.00645457	0.0386189	0.867321	0.955942	611	-0.00176658	0.0379102	0.962849	0.991307
NEFA C22:3	565	-0.054349	0.0256451	0.0345154	0.29052	534	-0.0810976	0.0265106	0.00233683	0.143038	523	-0.0701902	0.0272512	0.0102917	0.3271	523	-0.070607	0.0273136	0.0100204	0.307013
NEFA C22:4	736	-0.03624	0.0207985	0.081861	0.36402	691	-0.0481171	0.0219899	0.0290062	0.294829	676	-0.0387728	0.0225628	0.086195	0.521436	676	-0.0373724	0.0224063	0.0958108	0.564022
NEFA C22:5	737	-0.0286249	0.0236584	0.226705	0.566923	692	-0.0288443	0.0249802	0.248633	0.67993	677	-0.0243019	0.0256496	0.343757	0.807696	677	-0.022836	0.0254981	0.370802	0.793065
NEFA C24:2	540	-0.00986526	0.0208533	0.636354	0.809089	505	-0.00928726	0.0223934	0.678522	0.853831	494	-0.011707	0.0231077	0.612653	0.901721	494	-0.0155427	0.0229385	0.498372	0.868642
NEFA C24:3	561	-0.0343122	0.022007	0.11954	0.489882	530	-0.0504342	0.0227803	0.0272763	0.294829	518	-0.0462099	0.0234758	0.0495798	0.488012	518	-0.0460949	0.0235048	0.050432	0.49369
NEFA C24:4	737	-0.0459162	0.0206881	0.0267681	0.254297	692	-0.0498972	0.0218299	0.0225833	0.294829	677	-0.0426558	0.02243	0.0576482	0.50202	677	-0.0413163	0.0222833	0.0641737	0.511259
NEFA C26:0	605	0.00356905	0.0272646	0.895896	0.965166	577	0.00149362	0.0288083	0.958669	0.985899	565	-0.00180322	0.0296191	0.951477	0.965334	565	-0.000637591	0.0296039	0.982825	0.993864
NEFA C26:3	637	-0.0397014	0.0200997	0.0486863	0.299278	598	-0.0373959	0.0211689	0.0778359	0.478462	585	-0.0361242	0.0214232	0.0923116	0.521436	585	-0.0365394	0.021451	0.0890522	0.564022
NEFA C26:4	530	-0.0358316	0.0198427	0.0715347	0.35597	492	-0.0420507	0.021214	0.048036	0.386136	483	-0.0366703	0.0215833	0.0899923	0.521436	483	-0.0354359	0.0214905	0.0998508	0.564022
C14:0	723	0.0157809	0.0157582	0.316948	0.598839	679	0.0185358	0.0166658	0.266447	0.67993	664	0.0148153	0.0169738	0.383075	0.807696	664	0.0154869	0.0169193	0.360351	0.793065
C15:1	725	0.0765669	0.026767	0.00435177	0.090952	681	0.0803004	0.0278843	0.00410636	0.143038	666	0.0663152	0.0284461	0.0200423	0.3271	666	0.0668498	0.0284531	0.0190965	0.307013
C16:0	733	-0.0126991	0.0105096	0.227309	0.566923	689	-0.00778755	0.011373	0.493742	0.853831	674	-0.0100602	0.0117034	0.390322	0.807696	674	-0.0100852	0.0117149	0.389611	0.793065
C16:1 n7	732	-0.0276786	0.0154761	0.0741138	0.357728	689	-0.0214502	0.0166941	0.199267	0.67993	674	-0.0229407	0.017096	0.180097	0.741314	674	-0.0228959	0.0171121	0.181356	0.732524
C17:0	722	0.0458446	0.0166665	0.00609617	0.111747	678	0.0472901	0.0175459	0.007211	0.188387	663	0.0407415	0.0179138	0.0232717	0.3271	663	0.0419971	0.0177675	0.0183861	0.307013
C18:0	733	-0.0215071	0.0106843	0.0444843	0.293294	689	-0.0183921	0.0114541	0.108799	0.541406	674	-0.0194875	0.011762	0.0980311	0.539171	674	-0.0194349	0.0117733	0.099262	0.564022
C18:1 n9	732	-0.0252964	0.0106799	0.0181146	0.222703	688	-0.0221792	0.0116791	0.0579819	0.416296	673	-0.0243704	0.011985	0.0424091	0.488012	673	-0.0244268	0.0119962	0.042127	0.49369
C18:1 n7	734	-0.0287959	0.0126307	0.0229042	0.239349	690	-0.0225284	0.0134865	0.0952918	0.510666	675	-0.0216381	0.0138147	0.117753	0.559329	675	-0.0219812	0.0138149	0.112059	0.569911
C18:2 n6	733	-0.0285703	0.0141351	0.0436203	0.293294	689	-0.0157774	0.0155029	0.309179	0.714386	674	-0.0178016	0.015941	0.26452	0.786513	674	-0.0168118	0.0158582	0.289471	0.793065
C18:3 n6	722	-0.0287002	0.0193209	0.137862	0.502132	678	-0.00975527	0.0207953	0.639144	0.853831	663	-0.0191143	0.0212436	0.368575	0.807696	663	-0.0188475	0.0212573	0.375604	0.793065
C18:3 n3	717	-0.0568127	0.030086	0.0593845	0.318631	674	-0.0443728	0.032233	0.169092	0.67993	659	-0.0331955	0.0329621	0.314271	0.807696	659	-0.0304632	0.0326152	0.350643	0.793065
C20:1 n9	694	0.00264296	0.0263317	0.920078	0.966313	651	-0.014112	0.0283712	0.619073	0.853831	636	-0.0138446	0.0291482	0.634973	0.908287	636	-0.0132159	0.0291548	0.65049	0.897812
C20:2 n6	720	-0.0135383	0.0190839	0.478301	0.751316	676	-0.0108906	0.0207888	0.600545	0.853831	661	-0.0154973	0.0213228	0.467613	0.857291	661	-0.0158811	0.0213292	0.456803	0.846621
C20:3 n9	734	0.0186183	0.0303291	0.539487	0.783006	690	0.0182251	0.0323686	0.573586	0.853831	675	0.0049029	0.0326939	0.880839	0.955942	675	-0.000413137	0.0312782	0.989465	0.993864
C20:3 n6	732	-0.00300608	0.0147701	0.838782	0.937462	688	0.000408762	0.0158624	0.979449	0.993713	673	-0.0011651	0.0163696	0.94328	0.965334	673	-0.00233801	0.0162539	0.885669	0.964087
C20:4 n6	732	-0.025118	0.0120987	0.0382357	0.29052	688	-0.0155209	0.0128667	0.228127	0.67993	673	-0.0148742	0.013156	0.258631	0.786513	673	-0.0147117	0.0131652	0.264201	0.793065
C20:3 n3	714	0.0248078	0.0207867	0.233092	0.566923	670	0.0259065	0.0224978	0.249938	0.67993	655	0.022798	0.0231445	0.32498	0.807696	655	0.023	0.0231616	0.321073	0.793065
C20:5 n3	729	0.0572689	0.0274629	0.0373886	0.29052	685	0.0394227	0.0297257	0.185216	0.67993	670	0.0380903	0.0305088	0.212291	0.778399	670	0.0402255	0.0302718	0.18437	0.732524
C22:4 n6	716	-0.0233906	0.0161952	0.149095	0.502593	672	-0.0194694	0.0174913	0.266072	0.67993	657	-0.0188459	0.017935	0.293748	0.807696	657	-0.019027	0.017948	0.289489	0.793065
C22:5 n6	734	-0.0241871	0.0215006	0.260977	0.566923	690	-0.00586774	0.0233913	0.802005	0.939649	675	-0.0137306	0.0237985	0.564168	0.879518	675	-0.016659	0.0232243	0.473436	0.851004
C22:5 n3	731	0.0405801	0.0272575	0.136981	0.502132	687	0.0440124	0.0282668	0.119929	0.561714	672	0.0515457	0.0288491	0.0744388	0.521436	672	0.0530948	0.0287478	0.0652066	0.511259
C22:6 n3	734	0.0151498	0.0165508	0.360308	0.650461	690	0.0153123	0.0174384	0.38021	0.771099	675	0.0166422	0.017798	0.350096	0.807696	675	0.0175882	0.0177359	0.321719	0.793065
AC C10:0	673	0.00206741	0.0272465	0.939539	0.967439	635	0.00281287	0.0289707	0.922684	0.96905	621	0.0102817	0.0298224	0.730393	0.919395	621	0.0116082	0.0298073	0.697089	0.908796
AC C10:1	650	0.00335627	0.0268586	0.900594	0.965252	616	0.00572933	0.0284411	0.840419	0.939649	602	0.013032	0.0293656	0.657365	0.908287	602	0.0145628	0.0293633	0.620118	0.895446
AC C12:0	682	0.0211219	0.028677	0.461659	0.73654	644	0.0164169	0.0299835	0.584211	0.853831	631	0.0243834	0.0306541	0.426672	0.833406	631	0.0248446	0.0305521	0.416431	0.813402
AC C14:1	733	-0.0160282	0.0252188	0.525264	0.768797	691	-0.015795	0.0267766	0.555472	0.853831	676	-0.00305916	0.0273456	0.910961	0.959274	676	-0.00227967	0.0273061	0.933491	0.990428
AC C16:0	738	0.00202544	0.0289773	0.944295	0.967439	693	-0.019411	0.030532	0.525151	0.853831	678	-0.00226047	0.0310779	0.942039	0.965334	678	-0.00222361	0.0311087	0.943039	0.990428
AC C18:1	693	0.0178282	0.0322035	0.580029	0.808173	655	-0.015291	0.0327867	0.641107	0.853831	642	-0.00465159	0.0328184	0.887334	0.955942	642	-0.00432806	0.0328194	0.895126	0.964337
AC C2:0	735	-0.0269362	0.0220077	0.221375	0.566923	690	-0.0200873	0.023406	0.391084	0.771099	675	-0.0158187	0.0240304	0.510594	0.879518	675	-0.014459	0.0239277	0.54587	0.868642
AC C3:0	737	-0.0112846	0.0249741	0.651513	0.812391	692	-0.0286646	0.0261428	0.273273	0.67993	677	-0.0175994	0.0265538	0.507704	0.879518	677	-0.0174256	0.0265775	0.512281	0.868642
AC C8:1	736	-0.142617	0.0381302	0.00019848	0.0225121	692	-0.142032	0.0410383	0.000572561	0.0982957	677	-0.120199	0.0416546	0.00403609	0.281181	677	-0.118393	0.041542	0.00451137	0.307013
H1	719	-0.165529	0.0661393	0.0125505	0.174871	674	-0.11692	0.069661	0.0937488	0.510666	659	-0.123265	0.0715646	0.085481	0.521436	659	-0.124614	0.0715302	0.0819761	0.564022
LPCa C14:0	736	0.0229705	0.0205805	0.264741	0.566923	692	0.0164688	0.0216659	0.447449	0.827582	677	0.0141281	0.022126	0.523354	0.879518	677	0.0118545	0.0216189	0.583648	0.888344
LPCa C16:0	737	-0.0196079	0.0165207	0.235669	0.566923	692	-0.0238037	0.0173094	0.169534	0.67993	677	-0.0216145	0.0177782	0.224509	0.786279	677	-0.02305	0.0174931	0.188083	0.732524
LPCa C16:1	737	-0.0258495	0.0214404	0.228351	0.566923	692	-0.0184365	0.0221533	0.405581	0.784874	677	-0.0165564	0.0227666	0.467352	0.857291	677	-0.0211495	0.0212467	0.319901	0.793065
LPCa C18:0	738	-0.0158548	0.0193925	0.413872	0.691993	693	-0.0235807	0.0205384	0.251326	0.67993	678	-0.0240546	0.0210439	0.25343	0.786513	678	-0.0249678	0.0209967	0.234823	0.779016
LPCa C18:1	739	-0.0212979	0.0195363	0.276002	0.582671	694	-0.0136954	0.0200685	0.495199	0.853831	679	-0.012035	0.0205611	0.558527	0.879518	679	-0.0157776	0.0193593	0.415377	0.813402
LPCa C18:2	736	-0.0281929	0.0225264	0.211143	0.566923	691	-0.0152399	0.0232744	0.512826	0.853831	676	-0.0216447	0.0239309	0.366082	0.807696	676	-0.0244898	0.0232449	0.292478	0.793065
LPCa C18:3	604	-0.11715	0.0359117	0.00116961	0.0349212	576	-0.106072	0.0377098	0.00508453	0.15181	564	-0.117674	0.0387344	0.0024969	0.262571	564	-0.12193	0.0380147	0.00141869	0.2335
LPCa C20:3	736	-0.0242478	0.0242425	0.317543	0.598839	691	-0.00382261	0.025012	0.878578	0.951413	676	-0.00471448	0.0257915	0.855018	0.955942	676	-0.00855507	0.0246069	0.728202	0.908796
LPCa C20:4	735	-0.0492031	0.0219174	0.0250763	0.249568	690	-0.0228038	0.0224003	0.309041	0.714386	675	-0.0234655	0.0230671	0.309404	0.807696	675	-0.0260633	0.0224935	0.247003	0.793065
LPCa C22:6	668	-0.0095174	0.0252101	0.705908	0.852802	629	0.000362141	0.026823	0.989232	0.997611	616	0.00228688	0.0272117	0.933053	0.965334	616	-0.00130336	0.0269484	0.961442	0.991307
LPCe C16:0	692	0.0916484	0.0263546	0.000538566	0.0225121	654	0.0718862	0.027743	0.00978725	0.202698	641	0.071677	0.0281781	0.0112118	0.3271	641	0.0707111	0.0279856	0.0117642	0.307013
LPCe C18:0	733	0.0977935	0.0263998	0.000228305	0.0225121	688	0.0795291	0.0275878	0.00406967	0.143038	673	0.0657279	0.0278573	0.0185985	0.3271	673	0.065697	0.0278819	0.0187583	0.307013
LPCe C18:1	411	0.0491039	0.0361468	0.175085	0.566923	389	0.073833	0.0390987	0.0597553	0.416296	383	0.0694868	0.0399747	0.0830113	0.521436	383	0.062856	0.0397965	0.11511	0.569911
PCa C28:2	560	0.0299476	0.0376235	0.426388	0.701693	531	0.0408236	0.0402587	0.311048	0.714386	521	0.0337707	0.0410356	0.410924	0.826387	521	0.034209	0.0410556	0.405112	0.806365
PCa C30:0	737	0.00277419	0.0242407	0.908918	0.965674	692	0.00639858	0.0256824	0.803327	0.939649	677	0.000935268	0.0263424	0.971689	0.981077	677	0.000873493	0.0263683	0.973584	0.993864
PCa C30:2	700	-0.0211719	0.0233339	0.364544	0.650461	660	-0.0214823	0.0248063	0.386814	0.771099	645	-0.0205029	0.0253423	0.418802	0.830185	645	-0.0200681	0.0253622	0.429095	0.82276
PCa C32:0	739	-0.0232275	0.0208584	0.26583	0.566923	694	-0.0108534	0.0219138	0.620567	0.853831	679	-0.0115992	0.0225664	0.607424	0.901721	679	-0.0107947	0.0225387	0.632142	0.895446
PCa C32:1	737	-0.0279146	0.0271658	0.304501	0.598839	692	-0.0111146	0.0284645	0.696311	0.859507	677	-0.0139854	0.0291584	0.631649	0.908287	677	-0.0156813	0.0289843	0.588675	0.888344
PCa C32:2	733	-0.0249709	0.0219896	0.256514	0.566923	688	-0.0189864	0.0236183	0.421751	0.794107	673	-0.0216167	0.0242524	0.373088	0.807696	673	-0.0220857	0.0242573	0.362912	0.793065
PCa C32:3	727	-0.0397028	0.0223209	0.0757121	0.357728	683	-0.0230212	0.0234512	0.326624	0.733761	668	-0.0207566	0.0240925	0.389264	0.807696	668	-0.0219235	0.0240238	0.36181	0.793065
PCa C34:1	738	-0.0296379	0.0186785	0.11301	0.472382	693	-0.016864	0.0195562	0.388812	0.771099	678	-0.0185194	0.0200819	0.356769	0.807696	678	-0.0191099	0.0200722	0.341422	0.793065
PCa C34:2	736	-0.0310515	0.0207721	0.135388	0.502132	691	-0.0204291	0.0221501	0.356704	0.753042	676	-0.0242462	0.0228369	0.288763	0.807696	676	-0.0237447	0.0228298	0.298693	0.793065
PCa C34:3	738	-0.0234893	0.0220551	0.287221	0.591014	693	-0.0178015	0.0236309	0.451527	0.8278	678	-0.0244293	0.0242408	0.313938	0.807696	678	-0.0248787	0.0242507	0.305324	0.793065
PCa C34:4	736	0.0173136	0.0248731	0.486604	0.751316	692	0.0155015	0.0267014	0.561739	0.853831	677	0.0052288	0.0271614	0.847404	0.955942	677	0.0046588	0.0271597	0.863858	0.964087
PCa C34:5	493	0.0267385	0.0494467	0.588927	0.809089	465	0.0431858	0.0527327	0.413249	0.785173	455	0.0501616	0.0542481	0.355653	0.807696	455	0.0506865	0.0543844	0.351855	0.793065
PCa C36:1	736	-0.0323517	0.0188917	0.0872395	0.372103	691	-0.0180498	0.0198649	0.363876	0.7605	676	-0.0209028	0.0203066	0.303696	0.807696	676	-0.02156	0.0202901	0.288364	0.793065
PCa C36:2	735	-0.0428989	0.019749	0.0301676	0.274132	690	-0.0302777	0.0210408	0.15062	0.642441	675	-0.0341882	0.0216858	0.115393	0.559329	675	-0.0339441	0.0216987	0.118227	0.569911
PCa C36:3	736	-0.02574	0.0201093	0.200957	0.566923	691	-0.00951893	0.0210697	0.651573	0.853831	676	-0.0123897	0.0216934	0.56811	0.879518	676	-0.0136416	0.0215275	0.526513	0.868642
PCa C36:4	737	-0.0272873	0.0185354	0.141412	0.502132	692	-0.00839969	0.0193824	0.664888	0.853831	677	-0.00759509	0.0198281	0.701809	0.919395	677	-0.00727802	0.0198391	0.713848	0.908796
PCa C36:5	738	0.0141186	0.0238099	0.553385	0.792471	693	0.012796	0.0251043	0.61042	0.853831	678	0.0112652	0.0256422	0.660572	0.908287	678	0.0131674	0.0254259	0.604724	0.895446
PCa C36:6	673	0.00793442	0.0349865	0.820661	0.935405	629	0.00604375	0.0370871	0.870603	0.947688	619	-0.00365921	0.0376244	0.922556	0.959274	619	-0.00301614	0.0376301	0.936143	0.990428
PCa C38:0	733	-0.0114637	0.0242871	0.637065	0.809089	689	0.00301927	0.0256792	0.906439	0.96656	674	-0.000485829	0.0262805	0.985257	0.989993	674	0.000435437	0.0262489	0.98677	0.993864
PCa C38:2	612	-0.00864039	0.0334564	0.796297	0.925093	579	0.014585	0.0356069	0.682247	0.853831	568	0.0128865	0.0359989	0.720506	0.919395	568	0.0133055	0.0360415	0.712144	0.908796
PCa C38:3	736	-0.028557	0.0190318	0.133928	0.502132	691	-0.0108587	0.0198543	0.584615	0.853831	676	-0.0117481	0.0203887	0.564676	0.879518	676	-0.0124748	0.0203463	0.54001	0.868642
PCa C38:4	737	-0.0276435	0.0181716	0.128638	0.502132	692	-0.00879192	0.0189837	0.643421	0.853831	677	-0.00726403	0.019387	0.708017	0.919395	677	-0.00653298	0.0193586	0.73587	0.908796
PCa C38:5	734	-0.0121193	0.0177457	0.494865	0.751316	689	0.00456233	0.0185808	0.806114	0.939649	674	0.00520953	0.018898	0.782892	0.924432	674	0.00502169	0.0189111	0.790677	0.925972
PCa C38:6	735	0.0188461	0.0204468	0.356987	0.650461	690	0.0248433	0.0213654	0.245336	0.67993	676	0.0256405	0.0218823	0.241728	0.786279	676	0.0266739	0.0218236	0.222058	0.76082
PCa C40:0	572	0.0163962	0.034322	0.633039	0.809089	537	0.0321351	0.0362244	0.375432	0.769267	527	0.0186914	0.0368878	0.61258	0.901721	527	0.0184511	0.0368854	0.617134	0.895446
PCa C40:4	698	-0.00656073	0.0227387	0.773031	0.912788	659	0.00235482	0.0240158	0.921921	0.96905	646	0.00267913	0.0244899	0.912923	0.959274	646	0.00253215	0.0245056	0.917735	0.983623
PCa C40:5	738	-0.0174542	0.026263	0.506524	0.76109	693	-0.00136434	0.0279399	0.961068	0.985899	678	-0.00296579	0.0284537	0.917017	0.959274	678	-0.00420495	0.0283376	0.882083	0.964087
PCa C40:6	737	0.00553818	0.0234287	0.813202	0.933841	692	0.0110558	0.0243429	0.649855	0.853831	678	0.0136079	0.0249019	0.584937	0.897878	678	0.0145764	0.0248618	0.55788	0.870126
PCa C42:0	493	-0.00264059	0.0355266	0.940781	0.967439	466	-0.00717606	0.03759	0.848688	0.939649	456	-0.0118269	0.0389219	0.761378	0.919395	456	-0.015066	0.0388642	0.698461	0.908796
PCa C42:1	385	0.0173406	0.0373392	0.642626	0.809089	365	0.00118824	0.0401856	0.976428	0.993713	357	0.00808554	0.0410644	0.844025	0.955942	357	0.000313988	0.0407995	0.993864	0.993864
PCa C42:5	385	0.000727312	0.0359825	0.983884	0.99339	364	0.00925185	0.0392085	0.813599	0.939649	357	0.0128366	0.0408351	0.753449	0.919395	357	0.00638966	0.0408122	0.875684	0.964087
PCa C43:6	689	-0.0108313	0.0273787	0.692519	0.841491	652	-0.0119025	0.0288132	0.679682	0.853831	640	-0.0124738	0.0294958	0.672516	0.917615	640	-0.0120307	0.0294845	0.68339	0.908796
PCa C44:12	690	0.0024132	0.027295	0.929576	0.967439	651	0.0139844	0.0287167	0.626445	0.853831	638	0.0180337	0.029446	0.540478	0.879518	638	0.0180453	0.0294719	0.540575	0.868642
PCe C32:0	739	0.010151	0.0215202	0.637285	0.809089	694	0.0140248	0.0229499	0.541337	0.853831	679	0.00686955	0.0235557	0.770662	0.919395	679	0.00632959	0.0235574	0.788255	0.925972
PCe C32:1	739	-0.0191248	0.0213454	0.37057	0.650461	694	-0.0129323	0.0226853	0.568817	0.853831	679	-0.0172357	0.023245	0.45867	0.857291	679	-0.0172237	0.023268	0.459426	0.846621
PCe C32:2	700	0.00452951	0.0278365	0.870789	0.953033	660	0.00706268	0.0295963	0.811466	0.939649	645	-0.00297092	0.030029	0.921222	0.959274	645	-0.00214688	0.0300326	0.943035	0.990428
PCe C34:0	739	0.0688858	0.026765	0.0102597	0.153162	694	0.0730568	0.0280625	0.00943627	0.202698	679	0.0695084	0.0285414	0.0151443	0.3271	679	0.0700073	0.0285544	0.0144794	0.307013
PCe C34:1	737	0.00228728	0.0202792	0.910229	0.965674	692	0.00943576	0.0216031	0.662414	0.853831	677	0.00803155	0.0221003	0.716414	0.919395	677	0.00735594	0.0220873	0.739212	0.908796
PCe C34:2	737	0.000184965	0.0197609	0.992534	0.993516	692	0.00818636	0.0211712	0.69912	0.859507	677	0.00370902	0.021716	0.864437	0.955942	677	0.00384326	0.0217361	0.859709	0.964087
PCe C34:3	737	-0.0203607	0.0242026	0.400481	0.686004	692	-0.0047891	0.0259825	0.853818	0.939649	677	-0.0158386	0.0265154	0.55049	0.879518	677	-0.0140874	0.0263426	0.592988	0.888344
PCe C34:4	623	-0.0185182	0.0457463	0.685766	0.838159	585	-0.0278254	0.0486321	0.567441	0.853831	572	-0.0308939	0.0499677	0.536649	0.879518	572	-0.0308862	0.0500133	0.537123	0.868642
PCe C36:0	590	0.0141523	0.0297503	0.634468	0.809089	554	0.0224031	0.0314582	0.47668	0.853831	543	0.0201438	0.0320397	0.529812	0.879518	543	0.0201388	0.0320738	0.530352	0.868642
PCe C36:1	737	0.0436138	0.022879	0.0570119	0.318631	692	0.0430161	0.0242129	0.0760933	0.478462	677	0.0387907	0.024729	0.117221	0.559329	677	0.0393307	0.0247334	0.11228	0.569911
PCe C36:2	736	0.0248805	0.0220372	0.259266	0.566923	691	0.0239908	0.023474	0.307146	0.714386	676	0.0161613	0.0238486	0.498227	0.879518	676	0.0169742	0.0238228	0.4764	0.851004
PCe C36:3	735	-0.0109958	0.0211635	0.603527	0.809089	690	0.00013427	0.0225971	0.995261	0.997611	675	-0.0055008	0.0231996	0.812648	0.93451	675	-0.00673909	0.0231437	0.771003	0.925008
PCe C36:4	737	-0.0170928	0.0191936	0.37347	0.650461	692	-0.00262894	0.0204299	0.897649	0.96656	677	-0.00951457	0.0208481	0.648272	0.908287	677	-0.0100263	0.0208473	0.630722	0.895446
PCe C36:5	737	-0.0171935	0.0206995	0.406461	0.686004	692	-0.00468683	0.0218418	0.83016	0.939649	677	-0.00756982	0.0224106	0.73564	0.919395	677	-0.00677313	0.0223843	0.762304	0.920934
PCe C36:6	412	0.107799	0.0890668	0.226874	0.566923	388	0.144607	0.0961929	0.13362	0.581803	383	0.153042	0.0989326	0.122756	0.570131	383	0.153014	0.0990732	0.123357	0.572927
PCe C38:0	734	0.0276448	0.0265388	0.297913	0.59869	689	0.0364344	0.0278622	0.19144	0.67993	674	0.0359646	0.0284534	0.206693	0.771407	674	0.0391649	0.0280755	0.163499	0.711904
PCe C38:2	726	0.00263955	0.0366407	0.942591	0.967439	681	0.0193075	0.0380844	0.612349	0.853831	666	0.0129197	0.0389391	0.740154	0.919395	666	0.0133926	0.0389597	0.731144	0.908796
PCe C38:3	730	0.0307159	0.0273798	0.262308	0.566923	685	0.0544821	0.0287129	0.0582012	0.416296	670	0.0476053	0.0294481	0.106459	0.549578	670	0.0484947	0.0293773	0.0992776	0.564022
PCe C38:4	736	0.0154473	0.0181563	0.395167	0.682561	691	0.0257707	0.0192893	0.182003	0.67993	676	0.0173223	0.0195726	0.376469	0.807696	676	0.0176812	0.019581	0.366873	0.793065
PCe C38:5	736	-0.0191492	0.0191588	0.31789	0.598839	691	-0.0047209	0.0204216	0.817252	0.939649	676	-0.00837672	0.0208623	0.688167	0.919395	676	-0.00853279	0.020881	0.68294	0.908796
PCe C38:6	737	0.00334921	0.0206098	0.870953	0.953033	692	0.00859808	0.0219214	0.695018	0.859507	677	0.00368324	0.0223726	0.869285	0.955942	677	0.00452851	0.0223411	0.839434	0.958698
PCe C40:0	734	0.0111589	0.0193816	0.564968	0.792471	690	0.0220704	0.0203824	0.279283	0.686708	676	0.0212052	0.0208853	0.310333	0.807696	676	0.0221779	0.0208292	0.287385	0.793065
PCe C40:1	633	0.015041	0.0334404	0.653023	0.812391	595	0.0235632	0.0355811	0.508085	0.853831	585	0.0225745	0.0363031	0.534304	0.879518	585	0.0224935	0.0363266	0.536035	0.868642
PCe C40:3	571	0.0616018	0.0424478	0.147277	0.502593	534	0.11146	0.0445221	0.012608	0.202698	524	0.1084	0.0451161	0.0166383	0.3271	524	0.107719	0.045081	0.0172433	0.307013
PCe C40:4	731	-0.00347422	0.0229325	0.879626	0.957509	686	0.0188014	0.0240971	0.43553	0.81273	672	0.0102612	0.0245524	0.676137	0.917615	672	0.0114875	0.0244747	0.638971	0.896274
PCe C40:5	732	-0.00640895	0.0254381	0.801157	0.925093	687	0.0114504	0.0264901	0.665698	0.853831	672	0.00718426	0.0271091	0.791085	0.925387	672	0.00827072	0.0270411	0.759812	0.920934
PCe C40:6	735	0.0421232	0.0218279	0.0540271	0.313657	690	0.0471101	0.0225908	0.0374172	0.325841	675	0.0394965	0.0228226	0.0840022	0.521436	675	0.0412606	0.0226112	0.0684941	0.511259
PCe C42:1	406	0.0116175	0.042335	0.783906	0.920429	382	0.0256579	0.0455337	0.573448	0.853831	374	0.00521299	0.0461089	0.910049	0.959274	374	0.0024373	0.046114	0.957878	0.991307
PCe C42:2	581	-0.00718844	0.039667	0.85626	0.951906	547	-0.00723943	0.0419597	0.863085	0.944423	536	-0.0100842	0.0427898	0.813784	0.93451	536	-0.0094341	0.0428065	0.825656	0.953382
PCe C42:3	492	0.0488241	0.042752	0.254012	0.566923	465	0.0720055	0.0456755	0.115631	0.561714	456	0.0755249	0.0468681	0.107812	0.549578	456	0.0730746	0.0469051	0.119981	0.569911
PCe C42:4	673	0.0144429	0.0275553	0.600356	0.809089	634	0.0200209	0.0290837	0.49147	0.853831	624	0.0221795	0.0298475	0.457717	0.857291	624	0.0220171	0.0297707	0.45986	0.846621
PCe C42:5	639	0.0166647	0.0286982	0.561661	0.792471	601	0.0249829	0.0297141	0.400821	0.782913	591	0.0227583	0.0304301	0.454839	0.857291	591	0.0232344	0.0304322	0.445497	0.846444
PCe C42:6	665	0.0140318	0.0280608	0.617211	0.809089	627	0.0260753	0.0292702	0.373365	0.769267	612	0.020815	0.0301666	0.490466	0.879518	612	0.0193171	0.0299945	0.519813	0.868642
SMa C30:1	586	0.0426652	0.0367095	0.245623	0.566923	550	0.0484927	0.0388891	0.212967	0.67993	539	0.0370624	0.0396994	0.35096	0.807696	539	0.0370222	0.0396875	0.351338	0.793065
SMa C32:1	738	0.0211871	0.0190252	0.26581	0.566923	693	0.0224627	0.0201859	0.266198	0.67993	678	0.0183024	0.0207002	0.376935	0.807696	678	0.0181482	0.0207188	0.381393	0.793065
SMa C32:2	737	0.0182457	0.023971	0.446814	0.729563	692	0.0305451	0.02514	0.224796	0.67993	677	0.0304049	0.0257751	0.238581	0.786279	677	0.0291286	0.0256939	0.257348	0.793065
SMa C33:1	737	0.0438368	0.0189528	0.021007	0.237739	692	0.0447657	0.0202428	0.027344	0.294829	677	0.037672	0.0206268	0.0682545	0.521436	677	0.037827	0.0206454	0.0673757	0.511259
SMa C34:0	730	-0.0190441	0.0180319	0.291265	0.591014	686	-0.0176884	0.018898	0.349619	0.753042	671	-0.0163937	0.0194511	0.399644	0.818879	671	-0.0168067	0.019457	0.388026	0.793065
SMa C34:1	737	-0.0230919	0.0156989	0.14175	0.502132	692	-0.0211862	0.0167092	0.205262	0.67993	677	-0.0228235	0.0171785	0.184442	0.741314	677	-0.0225902	0.0171901	0.189265	0.732524
SMa C34:2	739	-0.0332501	0.0187773	0.0770228	0.357728	694	-0.0254338	0.0199285	0.20231	0.67993	679	-0.0279777	0.0204762	0.1723	0.734912	679	-0.0285676	0.0204668	0.16325	0.711904
SMa C35:1	737	0.0532936	0.0196276	0.00678163	0.111747	692	0.0494176	0.0209641	0.0186988	0.260537	677	0.0420642	0.0213782	0.0495362	0.488012	677	0.0425423	0.0213817	0.0470475	0.49369
SMa C36:0	500	-0.0169809	0.0229135	0.458997	0.73654	475	7.02563e-05	0.0234539	0.997611	0.997611	467	0.00940749	0.0241285	0.696803	0.919395	467	0.00806451	0.0240937	0.737999	0.908796
SMa C36:1	738	-0.00875131	0.0168798	0.604306	0.809089	693	-0.00451486	0.0177642	0.799454	0.939649	678	-0.00289532	0.018297	0.874317	0.955942	678	-0.00312313	0.0183104	0.864618	0.964087
SMa C36:2	739	-0.0223464	0.0191756	0.244261	0.566923	694	-0.00964368	0.0199617	0.629176	0.853831	679	-0.00961234	0.0205445	0.640028	0.908287	679	-0.0101301	0.0205421	0.622081	0.895446
SMa C36:3	671	0.00594689	0.0281011	0.832465	0.935405	636	0.0154014	0.0298155	0.605652	0.853831	623	0.0224458	0.0304935	0.461968	0.857291	623	0.0222714	0.0305202	0.465844	0.846621
SMa C38:1	618	-0.0159943	0.0200252	0.424774	0.701693	580	-0.00488159	0.0214373	0.819952	0.939649	570	-0.00643306	0.0218726	0.768781	0.919395	570	-0.00736312	0.0219003	0.736841	0.908796
SMa C38:2	737	-0.0271952	0.0191803	0.156661	0.519717	692	-0.011602	0.0202318	0.566532	0.853831	677	-0.012867	0.0208318	0.537014	0.879518	677	-0.0130689	0.0208492	0.530989	0.868642
SMa C38:3	724	-0.00663536	0.0262576	0.800572	0.925093	681	0.00156125	0.0277625	0.955171	0.985899	666	-0.00172595	0.0283108	0.951407	0.965334	666	-0.00158799	0.0283381	0.95533	0.991307
SMa C39:1	734	0.0784836	0.0231449	0.000734713	0.0255925	689	0.0806737	0.02428	0.000940629	0.0982957	674	0.0748631	0.0246773	0.00251264	0.262571	674	0.0756704	0.0246528	0.00223445	0.2335
SMa C40:1	677	-0.0329751	0.0187591	0.0792416	0.360033	634	-0.0245452	0.0199496	0.219035	0.67993	622	-0.0274967	0.0205388	0.181156	0.741314	622	-0.028205	0.0205406	0.170226	0.718933
SMa C40:2	738	-0.0227272	0.0196777	0.248486	0.566923	693	-0.00909578	0.0208196	0.662336	0.853831	678	-0.00966347	0.0213065	0.650307	0.908287	678	-0.00961662	0.0213275	0.65221	0.897812
SMa C40:3	451	-0.0312211	0.0314774	0.321813	0.600527	423	0.00747994	0.0340059	0.826013	0.939649	415	0.00561148	0.0349228	0.872426	0.955942	415	0.00467255	0.035041	0.893988	0.964337
SMa C40:4	728	-0.026595	0.0197506	0.178559	0.566923	684	-0.00397438	0.0206157	0.847187	0.939649	669	-0.0033881	0.0210749	0.872329	0.955942	669	-0.00314874	0.0210923	0.881377	0.964087
SMa C40:5	664	0.0201086	0.0278634	0.470748	0.745351	625	0.030721	0.0295132	0.298328	0.714386	612	0.0258142	0.0299337	0.388831	0.807696	612	0.0291365	0.029742	0.327667	0.793065
SMa C41:1	736	0.0318952	0.0218815	0.145379	0.502593	691	0.0439481	0.0230797	0.0573167	0.416296	676	0.0411497	0.0236589	0.082457	0.521436	676	0.0417412	0.023656	0.078118	0.562988
SMa C41:2	736	0.0480656	0.0229441	0.0365296	0.29052	692	0.0522643	0.0244682	0.033042	0.313899	677	0.048133	0.0249043	0.0537046	0.488012	677	0.0486481	0.0249115	0.0512682	0.49369
SMa C42:1	738	-0.0206671	0.0175792	0.240122	0.566923	693	-0.0120997	0.0189347	0.523026	0.853831	678	-0.0117935	0.0193933	0.54332	0.879518	678	-0.0115258	0.0194063	0.552772	0.868642
SMa C42:2	735	-0.0331192	0.0175439	0.0594575	0.318631	690	-0.0253113	0.0186982	0.176301	0.67993	675	-0.0245081	0.0192277	0.202898	0.771407	675	-0.0243433	0.0192451	0.20636	0.756176
SMa C42:3	739	-0.0432743	0.0221192	0.0508023	0.303363	694	-0.0275141	0.0235639	0.243369	0.67993	679	-0.0305864	0.024034	0.203603	0.771407	679	-0.0309699	0.0240471	0.198244	0.744861
SMa C42:4	481	-0.0563191	0.0244354	0.0216126	0.237739	455	-0.0293518	0.0258397	0.256614	0.67993	447	-0.0372013	0.0264257	0.159928	0.696351	447	-0.0330826	0.026342	0.209848	0.756176
SMa C42:5	434	-0.0139045	0.0416011	0.738369	0.881823	410	-0.028113	0.0456593	0.538442	0.853831	404	-0.0250973	0.0463581	0.588561	0.897878	404	-0.0247237	0.0464768	0.595063	0.888344
SMa C42:6	727	0.00464192	0.021473	0.828914	0.935405	683	0.0115249	0.0226103	0.610419	0.853831	669	0.013983	0.0231394	0.545862	0.879518	669	0.014804	0.0231184	0.522171	0.868642
SMa C43:2	689	0.0789041	0.0252877	0.00188433	0.0492281	650	0.0800399	0.0269634	0.00310731	0.143038	637	0.0736404	0.0274127	0.0074199	0.3271	637	0.073829	0.0274294	0.00730604	0.307013
SMa C44:6	435	-0.0359818	0.0377695	0.341302	0.631257	416	-0.0466046	0.039849	0.242891	0.67993	411	-0.0454363	0.0403848	0.261243	0.786513	411	-0.0398367	0.0403869	0.32456	0.793065
SMa C21:2	470	-0.0689006	0.0560281	0.219422	0.566923	444	-0.0574275	0.0582685	0.324906	0.733761	436	-0.0620957	0.0600037	0.301335	0.807696	436	-0.0598062	0.0601227	0.320446	0.793065
SMa C31:1	401	0.109269	0.0527359	0.0389213	0.29052	377	0.124311	0.0569244	0.0296239	0.294829	371	0.130638	0.0570693	0.0226658	0.3271	371	0.13116	0.0572051	0.0224518	0.312828
SMa C35:2	644	0.073682	0.0272078	0.00695076	0.111747	601	0.0729209	0.029104	0.0125006	0.202698	588	0.070773	0.029767	0.0177601	0.3271	588	0.0705751	0.0297999	0.0182075	0.307013
SMa C37:2	436	0.0521947	0.0342438	0.1282	0.502132	416	0.0566799	0.0367647	0.123943	0.563133	410	0.0617123	0.037668	0.102161	0.547481	410	0.0607222	0.0377678	0.108695	0.569911
SMa C37:3	708	-0.0338919	0.0339187	0.318044	0.598839	665	-0.0150411	0.036242	0.678268	0.853831	651	-0.0167659	0.03715	0.651928	0.908287	651	-0.0167319	0.037192	0.652954	0.897812
SMa C39:4	516	-0.00476304	0.0336968	0.88765	0.961238	485	0.0102773	0.036058	0.775756	0.939649	478	0.0118376	0.0368677	0.748293	0.919395	478	0.0128633	0.0368634	0.727292	0.908796
SMa C39:5	684	-0.0007365	0.0270861	0.978315	0.992563	646	0.0142456	0.0287991	0.621018	0.853831	633	0.0099046	0.0295151	0.737305	0.919395	633	0.0100202	0.0295357	0.734534	0.908796
SMa C41:5	558	0.00156608	0.0336891	0.96294	0.981729	526	0.0103078	0.0364538	0.777475	0.939649	519	0.0107777	0.0368638	0.77013	0.919395	519	0.01058	0.0369138	0.774528	0.925008
SMa C43:0	350	-0.0314351	0.0347387	0.366159	0.650461	331	-0.0173085	0.0379384	0.648543	0.853831	326	-0.0136568	0.0388546	0.725466	0.919395	326	-0.0119799	0.0384995	0.755884	0.920934

## Sheet: Factor7
	Crude model					Main model					Main model +					Main model ++
	Not Adjusted					Adjusted for city, sex, gestational age, smoking, materanl education, maternal age					Main model, further adjusted for maternal BMI, and maternal gestational weight gain					Main model +, further adjusted for birth weight
Metabolite	n	beta	se	p	p_fdr	n	beta	se	p	p_fdr	n	beta	se	p	p_fdr	n	beta	se	p	p_fdr
Ala	736	-0.0290689	0.0185621	0.117781	0.550289	691	-0.00951621	0.0192029	0.620368	0.904509	676	-0.00541194	0.0194222	0.780605	0.959854	676	-0.00609045	0.0193643	0.753228	0.948342
Arg	737	0.0240722	0.0353325	0.495899	0.803433	692	0.000485408	0.0361377	0.989287	0.989287	677	0.00224365	0.0368349	0.951449	0.995785	677	0.00338144	0.0367606	0.926738	0.987532
Asn	736	-0.0184134	0.0200197	0.358004	0.732414	691	0.00980448	0.0202792	0.628917	0.904509	676	0.0151326	0.0206029	0.462916	0.903802	676	0.0149728	0.0206144	0.4679	0.881001
Asp	734	-0.0191101	0.0311428	0.539656	0.811424	689	0.0244024	0.0310612	0.432369	0.898669	674	0.0305832	0.0316358	0.334041	0.875139	674	0.029541	0.0316455	0.350912	0.862414
Cit	729	0.000647776	0.0222345	0.976766	0.994986	684	-0.00456008	0.0233945	0.845515	0.949622	670	0.00163019	0.023653	0.945074	0.995785	670	0.00191415	0.0236644	0.935557	0.987532
Gln	715	-0.0886189	0.029228	0.00251958	0.124797	674	-0.0604319	0.0301517	0.045457	0.556989	660	-0.0568621	0.0301223	0.0595223	0.654745	660	-0.056913	0.0301498	0.0595277	0.654804
Glu	671	0.00040751	0.0205657	0.984197	0.994986	629	-0.000369134	0.0215865	0.986362	0.989287	616	0.000124249	0.0216978	0.995433	0.999173	616	6.44315e-05	0.0217214	0.997634	0.997634
Gly	738	-0.0236876	0.0179236	0.186726	0.587484	693	-0.00238074	0.0183797	0.896976	0.964553	678	-0.000800425	0.0186448	0.96577	0.996914	678	-0.000785097	0.0186613	0.966455	0.990143
His	737	-0.030944	0.0167345	0.0648513	0.550289	692	-0.0261655	0.0174516	0.134263	0.744689	677	-0.0213737	0.0175877	0.224707	0.875139	677	-0.0205075	0.0174432	0.240158	0.850729
Ile	735	0.0235693	0.0151408	0.119989	0.550289	690	0.0326585	0.0160517	0.0422892	0.556989	675	0.0349169	0.0162547	0.0320752	0.644854	675	0.0352982	0.0162442	0.0301452	0.630618
Leu	736	0.0194332	0.0149884	0.195205	0.587484	691	0.0336684	0.0156173	0.0314539	0.556989	676	0.0346661	0.0158429	0.0290167	0.644854	676	0.0346911	0.015857	0.0290443	0.630618
Lys	610	0.00566801	0.0161552	0.725828	0.91328	573	0.0132047	0.0165246	0.42458	0.898669	560	0.0135987	0.016724	0.416506	0.903802	560	0.0135479	0.0167446	0.418821	0.876462
Met	736	-0.00749549	0.0177954	0.673732	0.91328	691	0.0150037	0.0181132	0.407779	0.888971	676	0.0190559	0.0183554	0.299579	0.875139	676	0.0188223	0.0183632	0.305745	0.862189
Orn	736	-0.0305772	0.0232974	0.189781	0.587484	691	0.00283439	0.0227436	0.900859	0.964553	676	0.00710537	0.0230985	0.758477	0.959854	676	0.00696823	0.0231174	0.763185	0.949438
Phe	738	-0.0137955	0.0142923	0.33475	0.730132	693	0.00155824	0.014602	0.915048	0.964553	678	0.00106716	0.0148373	0.942685	0.995785	678	0.000849391	0.0148403	0.954375	0.990143
Pro	737	-0.0134085	0.0156514	0.391896	0.758391	692	-0.0043572	0.0163665	0.790147	0.943661	677	-0.000561398	0.0166201	0.973064	0.996914	677	-0.00060073	0.0166346	0.971203	0.990153
Trp	733	0.0424639	0.0138314	0.00222083	0.124797	688	0.0454127	0.0146602	0.00203269	0.141611	673	0.0431335	0.0149113	0.00394834	0.275068	673	0.0433755	0.0149188	0.00376922	0.262589
Ser	736	0.00532528	0.0197894	0.787932	0.930383	691	0.0297197	0.0199913	0.137585	0.744689	676	0.0316871	0.0203838	0.120547	0.72832	676	0.0315916	0.0204008	0.121978	0.728382
Thr	736	0.0320168	0.0173136	0.064835	0.550289	691	0.032488	0.0182975	0.0762639	0.637566	676	0.0378014	0.0182895	0.039146	0.644854	676	0.0381578	0.0182809	0.0372509	0.630618
Tyr	735	0.0109939	0.0144177	0.445996	0.785365	690	0.0205771	0.0148753	0.167034	0.758917	675	0.0219839	0.0150271	0.143965	0.771503	675	0.0220176	0.0150402	0.143703	0.790366
Val	734	0.0186005	0.0125172	0.13772	0.550289	689	0.0280896	0.0131273	0.0327362	0.556989	674	0.0271841	0.0133393	0.0419674	0.644854	674	0.0270886	0.0133508	0.0428686	0.630618
NEFA C12:0	736	-0.103204	0.0435411	0.0180393	0.471277	691	-0.0881202	0.0459937	0.0558041	0.556989	676	-0.0735943	0.0461092	0.110957	0.72832	676	-0.0744682	0.0460904	0.106647	0.705802
NEFA C14:0	736	-0.0676486	0.0386719	0.0806673	0.550289	691	-0.0539923	0.0408002	0.186178	0.802776	676	-0.0492769	0.0414906	0.2354	0.875139	676	-0.049937	0.0414954	0.229248	0.826084
NEFA C14:1	738	-0.0849014	0.0456692	0.0634282	0.550289	693	-0.0829503	0.0480167	0.0845351	0.679532	678	-0.0774421	0.0489181	0.113886	0.72832	678	-0.0786728	0.0488903	0.108065	0.705802
NEFA C15:0	734	-0.0636223	0.0333023	0.0564753	0.550289	690	-0.04078	0.0346348	0.239447	0.838074	675	-0.0372062	0.0351597	0.290357	0.875139	675	-0.0378766	0.0351511	0.281643	0.862189
NEFA C15:1	637	-0.0996556	0.0432204	0.0214534	0.488008	599	-0.0706919	0.0449825	0.116606	0.744689	587	-0.069248	0.0456927	0.130205	0.735482	587	-0.0714735	0.0457094	0.118464	0.728382
NEFA C16:0	736	-0.0349305	0.0226555	0.12356	0.550289	691	-0.0210504	0.0238491	0.377746	0.877211	676	-0.0234373	0.0242912	0.334981	0.875139	676	-0.0244033	0.0241942	0.313523	0.862189
NEFA C16:1	739	-0.0746382	0.0393701	0.0583852	0.550289	694	-0.0672318	0.0415127	0.105801	0.744689	679	-0.0713311	0.0421406	0.0909922	0.72832	679	-0.0724574	0.042096	0.0856828	0.705802
NEFA C17:0	734	-0.029199	0.0225265	0.195324	0.587484	690	-0.0115338	0.0232144	0.619468	0.904509	675	-0.0135197	0.0236114	0.567119	0.920525	675	-0.0144422	0.0235109	0.53925	0.898597
NEFA C17:1	735	-0.0456059	0.0304205	0.134267	0.550289	691	-0.0303746	0.0317853	0.339612	0.86088	676	-0.0315637	0.0323207	0.329143	0.875139	676	-0.0321555	0.0323163	0.320096	0.862414
NEFA C18:0	733	-0.025579	0.0192249	0.183774	0.587484	688	-0.0129649	0.0201545	0.52027	0.904509	673	-0.0139836	0.0206159	0.497831	0.903802	673	-0.0150301	0.0205225	0.464207	0.881001
NEFA C18:1	736	-0.0395885	0.0289976	0.172608	0.587484	691	-0.0334314	0.0306715	0.276116	0.860232	676	-0.0386992	0.0311279	0.214232	0.871222	676	-0.0392332	0.0311276	0.207981	0.817129
NEFA C18:2	736	-0.0233839	0.0298071	0.433002	0.785365	691	-0.0213696	0.031708	0.500577	0.904509	676	-0.0207196	0.032144	0.519423	0.903802	676	-0.0217621	0.0320684	0.497623	0.891897
NEFA C18:3	735	-0.0770425	0.0373974	0.0397497	0.550289	690	-0.0812448	0.0396162	0.0406785	0.556989	676	-0.0785792	0.0403571	0.0519546	0.644854	676	-0.079551	0.0403211	0.0489281	0.630618
NEFA C20:0	580	-0.0241503	0.0241222	0.317176	0.730132	551	-0.0112376	0.0250637	0.654075	0.90531	540	-0.0160692	0.0255249	0.529268	0.903802	540	-0.0162574	0.0255431	0.524753	0.898597
NEFA C20:1	736	-0.0346936	0.0240838	0.150152	0.560388	691	-0.0257789	0.0252322	0.30731	0.86088	676	-0.0318396	0.0255796	0.213682	0.871222	676	-0.0319917	0.0255998	0.211867	0.817129
NEFA C20:2	643	-0.0102868	0.0296143	0.728439	0.91328	606	-0.00176808	0.0308869	0.954371	0.968269	593	-5.01641e-05	0.0313284	0.998723	0.999173	593	-0.00174817	0.0311851	0.955315	0.990143
NEFA C20:3	694	-0.0209917	0.0251533	0.404267	0.768107	656	-0.0263094	0.0266339	0.323622	0.86088	643	-0.0251358	0.0271459	0.354834	0.903802	643	-0.0258884	0.0271443	0.340594	0.862414
NEFA C20:4	736	-0.0155336	0.0242264	0.521607	0.811424	691	-0.0229657	0.025498	0.36808	0.877211	676	-0.0269787	0.0259789	0.299432	0.875139	676	-0.0275689	0.0259455	0.288373	0.862189
NEFA C22:0	604	-0.0118969	0.0375252	0.751328	0.918289	573	0.0186511	0.0390139	0.632794	0.904509	561	0.0164775	0.0398199	0.679185	0.942562	561	0.015956	0.0399009	0.689397	0.934375
NEFA C22:1	646	-0.0511214	0.0288568	0.0769527	0.550289	608	-0.0334941	0.0301489	0.267044	0.85865	596	-0.0396957	0.0307191	0.196807	0.871222	596	-0.0385966	0.0307578	0.210046	0.817129
NEFA C22:2	635	-0.0251119	0.0244764	0.305309	0.725108	598	-0.0166319	0.0255477	0.515299	0.904509	586	-0.0197186	0.0260741	0.449816	0.903802	586	-0.0200143	0.0261147	0.443761	0.878062
NEFA C22:6	736	-0.00687138	0.0240535	0.775213	0.925826	691	0.00181293	0.0251899	0.942647	0.964553	676	-0.00170485	0.0256807	0.947091	0.995785	676	-0.00368097	0.025134	0.883609	0.98231
NEFA C24:1	695	-0.0317661	0.0187019	0.089863	0.550289	657	-0.024825	0.019332	0.199564	0.802776	644	-0.0325087	0.0196006	0.0977142	0.72832	644	-0.0324451	0.0196237	0.0987661	0.705802
NEFA C16:2	671	-0.0739708	0.0337603	0.0288003	0.488008	629	-0.0697721	0.0355509	0.0501518	0.556989	616	-0.0731307	0.0360416	0.0429012	0.644854	616	-0.0751706	0.0358546	0.036461	0.630618
NEFA C16:3	589	-0.0197056	0.0317557	0.535151	0.811424	555	-0.0144481	0.0336718	0.668033	0.90761	545	-0.0165366	0.0342823	0.629749	0.942562	545	-0.0201524	0.0340701	0.554443	0.898597
NEFA C18:4	660	-0.0631353	0.0422263	0.135363	0.550289	618	-0.0550056	0.0446586	0.218552	0.830498	605	-0.0525166	0.0455217	0.249116	0.875139	605	-0.0552209	0.0452523	0.222853	0.817129
NEFA C19:1	736	-0.0442412	0.0272674	0.105137	0.550289	691	-0.0341828	0.0282619	0.226899	0.838074	676	-0.0355578	0.0287595	0.216763	0.871222	676	-0.0362294	0.0287369	0.207861	0.817129
NEFA C20:5	668	-0.000971667	0.0375927	0.979387	0.994986	626	-0.000659505	0.0398236	0.986793	0.989287	611	-0.00474083	0.0403334	0.906472	0.995785	611	-0.00931945	0.0395893	0.813978	0.955903
NEFA C22:3	565	-0.0400965	0.0270242	0.138456	0.550289	534	-0.028379	0.0279679	0.31073	0.86088	523	-0.0306648	0.0282865	0.278855	0.875139	523	-0.0308796	0.0283348	0.276323	0.862189
NEFA C22:4	736	-0.0128569	0.0218191	0.555879	0.817977	691	-0.00981626	0.0229297	0.668715	0.90761	676	-0.0141606	0.0233117	0.543766	0.903802	676	-0.015275	0.0231439	0.509489	0.891897
NEFA C22:5	737	-0.0194201	0.0248099	0.43403	0.785365	692	-0.0205375	0.025979	0.429492	0.898669	677	-0.0203641	0.0264595	0.441797	0.903802	677	-0.0215367	0.0262978	0.413113	0.876462
NEFA C24:2	540	-0.025233	0.0213978	0.23884	0.665566	505	-0.0218351	0.0229185	0.341203	0.86088	494	-0.0163784	0.0233116	0.482663	0.903802	494	-0.0183996	0.0231175	0.426483	0.876462
NEFA C24:3	561	-0.0512843	0.023036	0.0264037	0.488008	530	-0.0392147	0.0239058	0.101545	0.744689	518	-0.0403948	0.0243381	0.0976022	0.72832	518	-0.040421	0.0243612	0.0977046	0.705802
NEFA C24:4	737	-0.0178225	0.0217463	0.412735	0.777132	692	-0.0194569	0.022767	0.393073	0.884891	677	-0.0196982	0.0231843	0.39584	0.903802	677	-0.0207759	0.0230262	0.367248	0.862414
NEFA C26:0	605	0.00245244	0.028956	0.932532	0.989336	577	0.0127587	0.0306743	0.677614	0.907828	565	0.0136955	0.0313271	0.662158	0.942562	565	0.0133894	0.0312997	0.668981	0.934375
NEFA C26:3	637	-0.020167	0.0207295	0.330999	0.730132	598	-0.020375	0.0215937	0.345789	0.86088	585	-0.0195041	0.0218585	0.372622	0.903802	585	-0.0191883	0.0218858	0.381	0.868098
NEFA C26:4	530	-0.0324448	0.0217985	0.137258	0.550289	492	-0.0333321	0.0233006	0.153229	0.744689	483	-0.0369684	0.0234977	0.116341	0.72832	483	-0.0391166	0.0233942	0.0951935	0.705802
C14:0	723	-0.0243316	0.0163365	0.136818	0.550289	679	-0.0188428	0.0174235	0.27988	0.860232	664	-0.0159936	0.0176362	0.364812	0.903802	664	-0.0162086	0.0175779	0.356817	0.862414
C15:1	725	-0.0206199	0.0279221	0.460464	0.785365	681	-0.00198167	0.0292972	0.946092	0.964553	666	0.00771338	0.0296041	0.79452	0.959854	666	0.00761031	0.029608	0.797232	0.955903
C16:0	733	-0.0214018	0.0109151	0.0502863	0.550289	689	-0.0170433	0.0118881	0.152136	0.744689	674	-0.0159191	0.0121638	0.191081	0.871222	674	-0.0159162	0.012173	0.191497	0.817129
C16:1 n7	732	-0.0518498	0.0159416	0.00119661	0.124797	689	-0.057169	0.0172978	0.000999685	0.104467	674	-0.0542497	0.0176298	0.00217592	0.227384	674	-0.0542565	0.0176428	0.00218959	0.228813
C17:0	722	-0.0111547	0.0174058	0.521817	0.811424	678	0.00658741	0.0184493	0.721164	0.913768	663	0.00679587	0.0187067	0.71651	0.953826	663	0.00632259	0.0185568	0.733428	0.946642
C18:0	733	-0.0115967	0.0111371	0.298097	0.723994	689	-0.00444169	0.0120083	0.711583	0.913768	674	-0.00322409	0.0122584	0.792624	0.959854	674	-0.00323331	0.0122672	0.79219	0.955903
C18:1 n9	732	-0.0330098	0.01108	0.00298557	0.124797	688	-0.0329157	0.0121885	0.00709519	0.296579	673	-0.0340822	0.0124329	0.00628523	0.291124	673	-0.0340743	0.0124422	0.00633596	0.294143
C18:1 n7	734	-0.0214998	0.0131245	0.101823	0.550289	690	-0.0212359	0.0140874	0.132163	0.744689	675	-0.0231472	0.0143317	0.106764	0.72832	675	-0.0231104	0.0143295	0.107267	0.705802
C18:2 n6	733	0.00308814	0.014745	0.834166	0.942036	689	-0.00761454	0.0162337	0.639179	0.904509	674	-0.00405794	0.0165951	0.8069	0.963669	674	-0.00420651	0.0165035	0.798891	0.955903
C18:3 n6	722	-0.00398216	0.020155	0.843432	0.942036	678	-0.0100856	0.0217966	0.64372	0.904509	663	-0.00494745	0.0221561	0.823372	0.967874	663	-0.00505221	0.0221663	0.819778	0.955903
C18:3 n3	717	-0.0417118	0.0313596	0.183905	0.587484	674	-0.0507608	0.0338426	0.134113	0.744689	659	-0.0469698	0.0343964	0.172556	0.85867	659	-0.048504	0.0340206	0.15443	0.817129
C20:1 n9	694	-0.0572505	0.027444	0.0373367	0.550289	651	-0.0292957	0.0298847	0.327313	0.86088	636	-0.0232429	0.0305055	0.446393	0.903802	636	-0.0238207	0.0305093	0.435235	0.876462
C20:2 n6	720	-0.00714189	0.0199891	0.72098	0.91328	676	0.0104235	0.0218789	0.633935	0.904509	661	0.0181076	0.0223016	0.417121	0.903802	661	0.0181421	0.0223045	0.416296	0.876462
C20:3 n9	734	-0.0408109	0.031452	0.194846	0.587484	690	-0.039022	0.0337847	0.248487	0.838074	675	-0.0380704	0.0339086	0.261956	0.875139	675	-0.0376962	0.0324302	0.245499	0.855157
C20:3 n6	732	-0.0172511	0.0153008	0.259918	0.683463	688	-0.00950685	0.0165494	0.565853	0.904509	673	-0.00644989	0.0169697	0.704006	0.949272	673	-0.00632961	0.016846	0.707236	0.934375
C20:4 n6	732	-0.00538272	0.0125591	0.668346	0.91328	688	-0.00420516	0.0134359	0.754392	0.923196	673	-0.0050461	0.0136735	0.712215	0.953826	673	-0.00507371	0.0136799	0.71084	0.934375
C20:3 n3	714	-0.0233248	0.021711	0.283038	0.704226	670	-0.00420955	0.0236444	0.858749	0.949622	655	0.00385752	0.0241651	0.873221	0.991865	655	0.00379518	0.02418	0.875329	0.98186
C20:5 n3	729	-0.0434573	0.0285796	0.128802	0.550289	685	-0.016513	0.0311215	0.595871	0.904509	670	-0.00665191	0.0317537	0.834135	0.968523	670	-0.00705145	0.0315054	0.822969	0.955903
C22:4 n6	716	-0.029809	0.0169166	0.0784774	0.550289	672	-0.0173547	0.0184075	0.346124	0.86088	657	-0.0138687	0.0187629	0.460082	0.903802	657	-0.0138584	0.0187736	0.460671	0.881001
C22:5 n6	734	-0.0140257	0.0223298	0.530122	0.811424	690	-0.0143835	0.0244278	0.55618	0.904509	675	-0.0122244	0.0247074	0.62093	0.942562	675	-0.0120187	0.024109	0.618285	0.914188
C22:5 n3	731	-0.0431371	0.0283497	0.128541	0.550289	687	-0.0147263	0.0296341	0.619393	0.904509	672	-0.00650104	0.0300778	0.828945	0.967874	672	-0.00675897	0.02997	0.821641	0.955903
C22:6 n3	734	-0.0130097	0.0171716	0.448916	0.785365	690	0.0064988	0.0182171	0.721396	0.913768	675	0.00732707	0.0184762	0.691813	0.942562	675	0.00722306	0.018409	0.694914	0.934375
AC C10:0	673	0.0182518	0.0288288	0.526882	0.811424	635	0.0363098	0.0304076	0.232901	0.838074	621	0.0316069	0.0309739	0.307936	0.875139	621	0.0317711	0.0309447	0.304977	0.862189
AC C10:1	650	0.0616262	0.0283952	0.0303546	0.488008	616	0.0809509	0.0298349	0.00685534	0.296579	602	0.082536	0.0304758	0.0069647	0.291124	602	0.0823704	0.0304535	0.00703692	0.294143
AC C12:0	682	0.0267843	0.0301575	0.374782	0.745994	644	0.0585085	0.0312086	0.0612954	0.556989	631	0.0634864	0.0317063	0.0456942	0.644854	631	0.0609836	0.031629	0.0543116	0.630618
AC C14:1	733	0.0444481	0.0262789	0.0911972	0.550289	691	0.0587476	0.0275436	0.0332984	0.556989	676	0.0624266	0.0279306	0.0257528	0.644854	676	0.0615332	0.0278939	0.0277361	0.630618
AC C16:0	738	0.0187528	0.0303637	0.537029	0.811424	693	0.0457174	0.0316816	0.149482	0.744689	678	0.0490792	0.0319889	0.125452	0.72832	678	0.0490621	0.0320179	0.125926	0.731071
AC C18:1	693	0.00247539	0.0335974	0.941288	0.993582	655	0.0226412	0.0339758	0.505405	0.904509	642	0.0202813	0.0338038	0.548745	0.903802	642	0.0192169	0.033821	0.57011	0.907864
AC C2:0	735	0.0546377	0.0230046	0.0178076	0.471277	690	0.0625169	0.0242032	0.0100069	0.348573	675	0.0642141	0.0246421	0.00937463	0.326549	675	0.0632878	0.0245347	0.0101131	0.352274
AC C3:0	737	0.109745	0.0258654	2.49494e-05	0.00521443	692	0.126763	0.0267485	2.62558e-06	0.000548745	677	0.122361	0.0269731	6.81466e-06	0.00142426	677	0.122252	0.0269951	7.06356e-06	0.00147628
AC C8:1	736	0.0372191	0.040336	0.356459	0.732414	692	0.0390486	0.0430001	0.36415	0.877211	677	0.034376	0.0432124	0.426605	0.903802	677	0.0327382	0.0430889	0.447661	0.878062
H1	719	-0.0891989	0.0696784	0.200915	0.587484	674	-0.130442	0.0723078	0.071697	0.624361	659	-0.131471	0.07374	0.075082	0.72832	659	-0.130956	0.0737033	0.0760827	0.705802
LPCa C14:0	736	-0.0331353	0.0215354	0.124333	0.550289	692	-0.0118663	0.02248	0.597771	0.904509	677	-0.00791679	0.0227851	0.728362	0.956373	677	-0.00598344	0.0222607	0.788177	0.955903
LPCa C16:0	737	0.0204367	0.0172478	0.236454	0.665566	692	0.0367013	0.0178903	0.0406122	0.556989	677	0.0352115	0.0182274	0.0538198	0.644854	677	0.0365917	0.0179323	0.0417005	0.630618
LPCa C16:1	737	-0.00126587	0.0224977	0.955145	0.994986	692	0.00636685	0.0230338	0.782316	0.939678	677	0.00818672	0.0234833	0.727489	0.956373	677	0.0117915	0.0219183	0.590779	0.907864
LPCa C18:0	738	0.0227629	0.0203174	0.262931	0.683463	693	0.0434508	0.0212932	0.0416838	0.556989	678	0.0415466	0.0216605	0.0555377	0.644854	678	0.0422858	0.0216093	0.0507943	0.630618
LPCa C18:1	739	0.0211767	0.0204759	0.301375	0.723994	694	0.0260885	0.0208303	0.210851	0.816072	679	0.0229897	0.0211848	0.278235	0.875139	679	0.0259247	0.0199418	0.194055	0.817129
LPCa C18:2	736	0.0378217	0.0235196	0.108254	0.550289	691	0.0353055	0.024094	0.143304	0.744689	676	0.0404951	0.024563	0.0997089	0.72832	676	0.0433967	0.0238533	0.0693243	0.705802
LPCa C18:3	604	-0.0109887	0.0379935	0.772511	0.925826	576	0.00750222	0.0396966	0.850171	0.949622	564	0.0102585	0.0403159	0.799243	0.96001	564	0.0132372	0.0395979	0.73829	0.946642
LPCa C20:3	736	0.0113013	0.0253434	0.655784	0.91328	691	0.00827893	0.0259246	0.749564	0.923196	676	0.0087399	0.0265099	0.741745	0.956373	676	0.0126492	0.0252912	0.617144	0.914188
LPCa C20:4	735	0.0350302	0.0229564	0.127464	0.550289	690	0.026401	0.0232292	0.25614	0.838074	675	0.0256036	0.0237172	0.280749	0.875139	675	0.0283644	0.0231271	0.220474	0.817129
LPCa C22:6	668	0.0235525	0.0259519	0.364455	0.732414	629	0.0347995	0.027158	0.200552	0.802776	616	0.0330034	0.0275201	0.230912	0.875139	616	0.0353179	0.0272372	0.195248	0.817129
LPCe C16:0	692	0.0109587	0.0280308	0.695955	0.91328	654	0.032775	0.0288662	0.256635	0.838074	641	0.0295284	0.029143	0.311352	0.875139	641	0.0320258	0.0289466	0.268998	0.862189
LPCe C18:0	733	0.000340551	0.0277868	0.990225	0.994986	688	0.0292106	0.0287059	0.309248	0.86088	673	0.0301717	0.0286951	0.293441	0.875139	673	0.0302768	0.0287272	0.292303	0.862189
LPCe C18:1	411	0.00609706	0.0377138	0.87165	0.953795	389	0.0326602	0.0396389	0.410502	0.888971	383	0.0302209	0.0399896	0.450307	0.903802	383	0.0318855	0.0396916	0.422311	0.876462
PCa C28:2	560	-0.00531313	0.0395683	0.893233	0.964717	531	-0.00764109	0.041797	0.855016	0.949622	521	0.00371432	0.0421506	0.929817	0.995785	521	0.00363004	0.042168	0.931433	0.987532
PCa C30:0	737	-0.0559253	0.0253453	0.0276617	0.488008	692	-0.0531185	0.0266253	0.0464449	0.556989	677	-0.0447577	0.0271192	0.0993431	0.72832	677	-0.0447191	0.0271439	0.0999423	0.705802
PCa C30:2	700	0.00705564	0.0244701	0.773177	0.925826	660	0.022937	0.0257352	0.373121	0.877211	645	0.0209748	0.026066	0.421312	0.903802	645	0.0205328	0.0260863	0.431518	0.876462
PCa C32:0	739	-0.00830399	0.0218764	0.704364	0.91328	694	-0.00846266	0.0227662	0.710219	0.913768	679	-0.00455658	0.0232699	0.844816	0.973418	679	-0.0051923	0.0232383	0.823266	0.955903
PCa C32:1	737	-0.0433616	0.0284595	0.128041	0.550289	692	-0.0415129	0.0295362	0.16034	0.744689	677	-0.0341948	0.0300315	0.255277	0.875139	677	-0.032587	0.0298553	0.275458	0.862189
PCa C32:2	733	-0.0168647	0.0231194	0.465958	0.785365	688	-0.0181387	0.024626	0.461646	0.904509	673	-0.0157586	0.025105	0.530418	0.903802	673	-0.0152623	0.0251118	0.543552	0.898597
PCa C32:3	727	0.00887678	0.0235522	0.706362	0.91328	683	0.00884513	0.024491	0.718096	0.913768	668	0.0103586	0.0249714	0.678415	0.942562	668	0.0114169	0.0248999	0.646741	0.927264
PCa C34:1	738	-0.00822443	0.0196184	0.67518	0.91328	693	-0.00143565	0.0203394	0.94375	0.964553	678	-0.00144551	0.0207253	0.944417	0.995785	678	-0.000963256	0.0207146	0.962925	0.990143
PCa C34:2	736	0.00392531	0.0217401	0.856767	0.94743	691	0.0052341	0.022966	0.819789	0.949622	676	0.00960397	0.0234839	0.682704	0.942562	676	0.00910522	0.0234757	0.69825	0.934375
PCa C34:3	738	-0.0315143	0.0231158	0.173206	0.587484	693	-0.0236813	0.0245571	0.335225	0.86088	678	-0.0167712	0.0250121	0.502763	0.903802	678	-0.0164126	0.0250214	0.512094	0.891897
PCa C34:4	736	-0.0194296	0.0260271	0.4556	0.785365	692	-0.011762	0.02769	0.67114	0.90761	677	-0.00808163	0.0279519	0.772577	0.959854	677	-0.00749934	0.0279502	0.788545	0.955903
PCa C34:5	493	-0.0488368	0.0506439	0.335372	0.730132	465	-0.0316895	0.0540156	0.557721	0.904509	455	-0.0331472	0.0548254	0.545764	0.903802	455	-0.0327674	0.0550674	0.552128	0.898597
PCa C36:1	736	-0.00253214	0.0198795	0.89868	0.964717	691	0.00526542	0.0207032	0.79932	0.94383	676	0.00681201	0.0210107	0.745879	0.956373	676	0.00735947	0.0209929	0.726025	0.946642
PCa C36:2	735	0.0179766	0.0207157	0.385806	0.753584	690	0.0206985	0.0218607	0.344066	0.86088	675	0.0252782	0.0223535	0.258543	0.875139	675	0.0250305	0.0223665	0.26351	0.862189
PCa C36:3	736	-0.00426238	0.0210376	0.839499	0.942036	691	0.0026079	0.0218359	0.904969	0.964553	676	0.00600238	0.0222958	0.787849	0.959854	676	0.00723398	0.0221258	0.743813	0.947908
PCa C36:4	737	0.0158047	0.0194657	0.417102	0.778342	692	0.0198819	0.020141	0.323933	0.86088	677	0.0199742	0.0204428	0.328893	0.875139	677	0.0197146	0.0204527	0.335449	0.862414
PCa C36:5	738	-0.0284708	0.024951	0.25422	0.683463	693	-0.0144682	0.0260943	0.579452	0.904509	678	-0.00858243	0.0264483	0.745665	0.956373	678	-0.0101578	0.0262237	0.698622	0.934375
PCa C36:6	673	-0.00134413	0.0364732	0.970614	0.994986	629	0.014203	0.0380771	0.709274	0.913768	619	0.0173107	0.0382569	0.651084	0.942562	619	0.016748	0.0382616	0.661746	0.934375
PCa C38:0	733	0.0113928	0.025485	0.654983	0.91328	689	0.0187653	0.0266994	0.482405	0.904509	674	0.0189197	0.0271028	0.485382	0.903802	674	0.0181466	0.0270689	0.502853	0.891897
PCa C38:2	612	-0.0570892	0.0340394	0.0940364	0.550289	579	-0.033401	0.0357175	0.350119	0.86088	568	-0.0322662	0.0361037	0.371872	0.903802	568	-0.0327783	0.0361511	0.364966	0.862414
PCa C38:3	736	0.00383295	0.0199083	0.847382	0.942036	691	0.0125011	0.0205589	0.543354	0.904509	676	0.0155795	0.0209404	0.457152	0.903802	676	0.0162829	0.0208964	0.436134	0.876462
PCa C38:4	737	0.0323678	0.0190586	0.0898787	0.550289	692	0.0383615	0.0196851	0.0517437	0.556989	677	0.0392527	0.0199423	0.0494558	0.644854	677	0.0386847	0.0199122	0.0524767	0.630618
PCa C38:5	734	-0.0021919	0.0185678	0.906062	0.966158	689	0.00983521	0.0192688	0.609926	0.904509	674	0.0101431	0.0194219	0.601674	0.931481	674	0.0103338	0.019435	0.595107	0.907864
PCa C38:6	735	0.0200027	0.0214646	0.351707	0.732414	690	0.041785	0.0221982	0.0602232	0.556989	676	0.0404002	0.0225581	0.0737691	0.72832	676	0.0394816	0.0225008	0.0797873	0.705802
PCa C40:0	572	-0.00727277	0.0348433	0.834737	0.942036	537	0.00743827	0.0359678	0.836245	0.949622	527	0.00545501	0.0362946	0.880589	0.994828	527	0.00410334	0.0363149	0.910081	0.987532
PCa C40:4	698	-0.00941867	0.0237734	0.692092	0.91328	659	0.00279233	0.024911	0.910786	0.964553	646	0.0028003	0.0252444	0.91171	0.995785	646	0.00317286	0.0252683	0.900116	0.987532
PCa C40:5	738	-0.00557728	0.0274236	0.838899	0.942036	693	0.00903277	0.0289218	0.754897	0.923196	678	0.00865481	0.0292164	0.767148	0.959854	678	0.00981242	0.0290962	0.736044	0.946642
PCa C40:6	737	0.0167764	0.0245609	0.494794	0.803433	692	0.04129	0.0252545	0.10253	0.744689	678	0.0403956	0.0256387	0.11561	0.72832	678	0.0396474	0.0255975	0.121898	0.728382
PCa C42:0	493	-0.0329677	0.0356186	0.355131	0.732414	466	-0.0198081	0.0371427	0.594094	0.904509	456	-0.0172243	0.0380224	0.650773	0.942562	456	-0.0219868	0.0380125	0.563288	0.905594
PCa C42:1	385	-0.0534841	0.0366396	0.145202	0.553978	365	-0.0231055	0.0387728	0.551618	0.904509	357	-0.0248985	0.0393137	0.526949	0.903802	357	-0.0375976	0.0391962	0.33814	0.862414
PCa C42:5	385	0.000600457	0.0373118	0.987169	0.994986	364	0.0157964	0.0397668	0.691446	0.913768	357	0.0110157	0.0403672	0.785106	0.959854	357	0.00781345	0.0402396	0.846158	0.971687
PCa C43:6	689	0.0101749	0.0286447	0.722543	0.91328	652	0.0177335	0.0300081	0.554763	0.904509	640	0.0139067	0.0305228	0.648826	0.942562	640	0.0127584	0.0305234	0.676101	0.934375
PCa C44:12	690	-0.0467815	0.0286022	0.102393	0.550289	651	-0.0323373	0.0299	0.279884	0.860232	638	-0.03789	0.0304584	0.213978	0.871222	638	-0.0379351	0.0304927	0.213951	0.817129
PCe C32:0	739	-0.039495	0.0225088	0.0797445	0.550289	694	-0.0336445	0.0238119	0.158142	0.744689	679	-0.026089	0.0242659	0.282714	0.875139	679	-0.0256701	0.0242658	0.290507	0.862189
PCe C32:1	739	-0.0314557	0.022352	0.159772	0.58583	694	-0.030461	0.0235422	0.19615	0.802776	679	-0.0242913	0.0239567	0.310976	0.875139	679	-0.0243128	0.0239781	0.31098	0.862189
PCe C32:2	700	-0.0258254	0.0293377	0.379017	0.747307	660	-0.0307583	0.0309291	0.320367	0.86088	645	-0.0295681	0.0311374	0.342685	0.884213	645	-0.0303999	0.0311388	0.329312	0.862414
PCe C34:0	739	-0.0179721	0.0281706	0.523693	0.811424	694	-0.00206755	0.029299	0.943763	0.964553	679	-0.00220413	0.0295595	0.940583	0.995785	679	-0.00257173	0.0295722	0.930726	0.987532
PCe C34:1	737	-0.0353723	0.0212213	0.0959829	0.550289	692	-0.0297182	0.0224269	0.185587	0.802776	677	-0.0284748	0.0227695	0.211543	0.871222	677	-0.0279323	0.0227548	0.220068	0.817129
PCe C34:2	737	-0.0231115	0.0207131	0.264883	0.683463	692	-0.0166232	0.0220059	0.450275	0.898669	677	-0.0119235	0.0223987	0.594679	0.927521	677	-0.0120368	0.0224177	0.591498	0.907864
PCe C34:3	737	-0.0123858	0.0253991	0.625947	0.896048	692	-0.00824874	0.0270142	0.760196	0.923196	677	-0.00279864	0.0273617	0.918563	0.995785	677	-0.00425557	0.0271795	0.87563	0.98186
PCe C34:4	623	-0.0627362	0.0486708	0.197892	0.587484	585	-0.0422335	0.0513882	0.41151	0.888971	572	-0.0417402	0.0523128	0.425276	0.903802	572	-0.0419257	0.0523942	0.423945	0.876462
PCe C36:0	590	-0.0287477	0.0314652	0.361291	0.732414	554	-0.0254847	0.0328879	0.438745	0.898669	543	-0.0188246	0.0333774	0.573002	0.920525	543	-0.0188284	0.0334365	0.573605	0.907864
PCe C36:1	737	-0.0177669	0.0240671	0.460619	0.785365	692	-0.00213492	0.0252729	0.932704	0.964553	677	-0.00175329	0.0256093	0.945438	0.995785	677	-0.00219424	0.0256132	0.931756	0.987532
PCe C36:2	736	-0.0172285	0.0230176	0.454409	0.785365	691	-0.00542569	0.0242765	0.823218	0.949622	676	-0.00320576	0.0244611	0.895772	0.995785	676	-0.00388308	0.0244337	0.873779	0.98186
PCe C36:3	735	-0.0256827	0.0220884	0.245329	0.674655	690	-0.0203826	0.023352	0.383063	0.879783	675	-0.0159093	0.0237986	0.504054	0.903802	675	-0.0150616	0.0237385	0.525992	0.898597
PCe C36:4	737	-0.000728396	0.0201469	0.971169	0.994986	692	0.00243416	0.0212421	0.908804	0.964553	677	0.00406396	0.0215106	0.850208	0.973418	677	0.00448536	0.0215083	0.834872	0.964024
PCe C36:5	737	0.0234001	0.0217086	0.281431	0.704226	692	0.0260194	0.0226885	0.251871	0.838074	677	0.0263788	0.0230986	0.253872	0.875139	677	0.0257238	0.0230703	0.265255	0.862189
PCe C36:6	412	0.0536287	0.091812	0.559473	0.817977	388	0.0187243	0.0970981	0.847192	0.949622	383	0.0302766	0.0983983	0.758493	0.959854	383	0.0301463	0.0992081	0.761403	0.949438
PCe C38:0	734	-0.00704869	0.0278229	0.800078	0.934192	689	0.0144163	0.0289421	0.618573	0.904509	674	0.016191	0.0293506	0.581384	0.920525	674	0.0143223	0.0289633	0.621123	0.914188
PCe C38:2	726	-0.0191747	0.0385479	0.619045	0.896048	681	-0.00808107	0.039679	0.838681	0.949622	666	-0.00875871	0.0402778	0.827921	0.967874	666	-0.00936769	0.0403023	0.816274	0.955903
PCe C38:3	730	-0.0424823	0.028721	0.139547	0.550289	685	-0.0299085	0.0299348	0.318102	0.86088	670	-0.0267064	0.0304484	0.380759	0.903802	670	-0.0277535	0.0303773	0.361256	0.862414
PCe C38:4	736	-0.0141049	0.0190635	0.459607	0.785365	691	-0.00689133	0.0200933	0.731732	0.921277	676	-0.00558757	0.0202092	0.782263	0.959854	676	-0.00588151	0.0202167	0.771203	0.953736
PCe C38:5	736	-0.00297372	0.0200865	0.882348	0.960473	691	-0.00184133	0.0211838	0.93076	0.964553	676	-0.00400131	0.0214859	0.852323	0.973418	676	-0.00387477	0.0215037	0.857059	0.978827
PCe C38:6	737	0.00793565	0.0216255	0.713759	0.91328	692	0.0174874	0.022793	0.443218	0.898669	677	0.0195338	0.0230693	0.39745	0.903802	677	0.0188363	0.0230361	0.413835	0.876462
PCe C40:0	734	-0.00255496	0.0203442	0.900094	0.964717	690	0.0126958	0.0212247	0.549935	0.904509	676	0.0119686	0.0215736	0.579236	0.920525	676	0.0111888	0.0215161	0.603228	0.913584
PCe C40:1	633	-0.0315797	0.0345128	0.360541	0.732414	595	-0.0308384	0.0361329	0.393755	0.884891	585	-0.0259063	0.0366985	0.48053	0.903802	585	-0.0254078	0.0367352	0.489446	0.891897
PCe C40:3	571	-0.0444777	0.0426685	0.297679	0.723994	534	-0.0268191	0.0438647	0.541203	0.904509	524	-0.0179177	0.0441718	0.685183	0.942562	524	-0.0197573	0.0441507	0.654711	0.930847
PCe C40:4	731	-0.0154909	0.0240457	0.519636	0.811424	686	-0.00563491	0.0250819	0.822313	0.949622	672	-0.00211329	0.0253124	0.933489	0.995785	672	-0.0031432	0.0252311	0.900898	0.987532
PCe C40:5	732	-0.0351545	0.026699	0.188362	0.587484	687	-0.0208009	0.0276098	0.451485	0.898669	672	-0.0219247	0.0280345	0.434467	0.903802	672	-0.023009	0.0279629	0.410903	0.876462
PCe C40:6	735	-0.0167813	0.0229888	0.465642	0.785365	690	0.00712099	0.0236039	0.762985	0.923196	675	0.00515049	0.0236287	0.827517	0.967874	675	0.00358071	0.023415	0.878506	0.98186
PCe C42:1	406	-0.0765663	0.0433716	0.0782786	0.550289	382	-0.0873568	0.0459618	0.0581412	0.556989	374	-0.0602779	0.0459912	0.190832	0.871222	374	-0.0625456	0.0459677	0.174497	0.817129
PCe C42:2	581	-0.0353209	0.0416453	0.396721	0.760685	547	-0.0503509	0.0434603	0.247167	0.838074	536	-0.0473236	0.0441663	0.284455	0.875139	536	-0.0490027	0.0442106	0.268213	0.862189
PCe C42:3	492	-0.0587049	0.0426222	0.169053	0.587484	465	-0.0521719	0.0449128	0.246009	0.838074	456	-0.0564994	0.0454708	0.214708	0.871222	456	-0.0600515	0.0455238	0.187825	0.817129
PCe C42:4	673	-0.00590709	0.028835	0.837746	0.942036	634	-0.00769037	0.0301142	0.798521	0.94383	624	-0.0120039	0.0305472	0.694487	0.942562	624	-0.0139337	0.0304817	0.647754	0.927264
PCe C42:5	639	-0.0294266	0.0299517	0.326252	0.730132	601	-0.0173262	0.0305458	0.570784	0.904509	591	-0.0146272	0.0310384	0.637636	0.942562	591	-0.0154238	0.0310466	0.619527	0.914188
PCe C42:6	665	-0.0398526	0.0291449	0.171975	0.587484	627	-0.0183407	0.030332	0.545629	0.904509	612	-0.0167618	0.0308436	0.587029	0.922475	612	-0.018334	0.0306645	0.550144	0.898597
SMa C30:1	586	-0.0764799	0.0378948	0.044035	0.550289	550	-0.0580033	0.0398292	0.145903	0.744689	539	-0.0471472	0.0403788	0.243498	0.875139	539	-0.0505888	0.0404558	0.211695	0.817129
SMa C32:1	738	-0.029033	0.019938	0.145784	0.553978	693	-0.0141799	0.020995	0.499657	0.904509	678	-0.00846895	0.0213598	0.691873	0.942562	678	-0.00833676	0.0213772	0.696676	0.934375
SMa C32:2	737	-0.0725991	0.0250037	0.00380281	0.132465	692	-0.053903	0.0260777	0.0391177	0.556989	677	-0.0454914	0.0265499	0.0871106	0.72832	677	-0.0444874	0.0264638	0.0932306	0.705802
SMa C33:1	737	-0.00655284	0.0199502	0.74266	0.915281	692	0.00961378	0.0211235	0.649169	0.904509	677	0.0143598	0.0213277	0.500999	0.903802	677	0.0142483	0.0213458	0.504692	0.891897
SMa C34:0	730	0.000395127	0.019011	0.983424	0.994986	686	0.0119309	0.0197365	0.545713	0.904509	671	0.0134177	0.0201511	0.505743	0.903802	671	0.0137797	0.0201561	0.494444	0.891897
SMa C34:1	737	-0.0116113	0.0164887	0.481536	0.798739	692	-0.00244636	0.0173941	0.888194	0.964553	677	0.000986933	0.017746	0.955666	0.995785	677	0.00078546	0.0177562	0.96473	0.990143
SMa C34:2	739	-0.0119566	0.0197165	0.544423	0.812746	694	-0.00445733	0.0207265	0.82979	0.949622	679	-6.43465e-05	0.0211411	0.997572	0.999173	679	0.000388364	0.0211308	0.985342	0.994862
SMa C35:1	737	0.00857009	0.0206956	0.678922	0.91328	692	0.0278331	0.0218697	0.203575	0.802776	677	0.0308077	0.0220952	0.163699	0.834466	677	0.0304013	0.0221001	0.169414	0.817129
SMa C36:0	500	0.00143104	0.0241406	0.952754	0.994986	475	0.0216818	0.0245099	0.376832	0.877211	467	0.0202382	0.024809	0.415073	0.903802	467	0.0225359	0.0247894	0.363794	0.862414
SMa C36:1	738	1.0343e-05	0.0177033	0.999534	0.999534	693	0.00716781	0.0184663	0.698024	0.913768	678	0.00888458	0.0188731	0.637975	0.942562	678	0.00906849	0.0188852	0.631253	0.916194
SMa C36:2	739	0.0067348	0.0201136	0.737844	0.915281	694	0.0132318	0.0207339	0.523581	0.904509	679	0.0155968	0.0211761	0.461674	0.903802	679	0.0160033	0.0211716	0.449991	0.878062
SMa C36:3	671	-0.0460985	0.0293069	0.116211	0.550289	636	-0.0452767	0.0309045	0.14342	0.744689	623	-0.0423392	0.0314298	0.178457	0.867386	623	-0.0420092	0.0314715	0.18244	0.817129
SMa C38:1	618	0.00344547	0.0208141	0.868578	0.953795	580	0.0145652	0.0219198	0.506659	0.904509	570	0.015914	0.0222851	0.475465	0.903802	570	0.0167234	0.0223056	0.453736	0.878062
SMa C38:2	737	0.00994405	0.0201466	0.62175	0.896048	692	0.0108565	0.0210371	0.605979	0.904509	677	0.0139966	0.0214903	0.515083	0.903802	677	0.0141631	0.0215065	0.510419	0.891897
SMa C38:3	724	-0.0112934	0.0279145	0.685916	0.91328	681	-0.00630844	0.0289851	0.827774	0.949622	666	-0.000161395	0.0292954	0.995606	0.999173	666	-0.000308497	0.029324	0.991609	0.996377
SMa C39:1	734	0.0156739	0.0245434	0.523275	0.811424	689	0.0389271	0.0255038	0.127404	0.744689	674	0.0442785	0.0256897	0.0852592	0.72832	674	0.0435517	0.0256697	0.0902505	0.705802
SMa C40:1	677	0.00730404	0.0198791	0.713421	0.91328	634	0.0171819	0.0209557	0.412585	0.888971	622	0.0178609	0.0213188	0.402477	0.903802	622	0.0186495	0.0213228	0.382129	0.868098
SMa C40:2	738	0.00511218	0.0206526	0.804567	0.934192	693	0.00995885	0.0216411	0.645536	0.904509	678	0.0121462	0.0219731	0.580609	0.920525	678	0.0121072	0.0219931	0.582164	0.907864
SMa C40:3	451	-0.0421043	0.0329793	0.202387	0.587484	423	-0.0268447	0.0347298	0.439999	0.898669	415	-0.0211006	0.0351443	0.548587	0.903802	415	-0.0208887	0.0351861	0.553079	0.898597
SMa C40:4	728	0.0121683	0.0208501	0.559669	0.817977	684	0.0158049	0.0215337	0.463233	0.904509	669	0.0159091	0.0218342	0.466493	0.903802	669	0.0156932	0.0218513	0.472906	0.882477
SMa C40:5	664	-0.0322953	0.0286895	0.260716	0.683463	625	-0.0184371	0.0299045	0.537776	0.904509	612	-0.0142807	0.0302997	0.63759	0.942562	612	-0.0166777	0.0300993	0.57973	0.907864
SMa C41:1	736	-0.00973092	0.023041	0.672911	0.91328	691	0.00724298	0.0241333	0.764176	0.923196	676	0.00964248	0.0245323	0.69441	0.942562	676	0.00920686	0.024529	0.707526	0.934375
SMa C41:2	736	-0.0175331	0.0243428	0.471599	0.788514	692	-0.00805464	0.025538	0.752558	0.923196	677	-0.00235928	0.0257753	0.927098	0.995785	677	-0.00277701	0.0257824	0.914259	0.987532
SMa C42:1	738	0.0142053	0.0184435	0.441431	0.785365	693	0.0258572	0.0196649	0.188999	0.802776	678	0.0279634	0.0199826	0.162174	0.834466	678	0.0277523	0.0199944	0.165612	0.817129
SMa C42:2	735	0.00566106	0.0184559	0.759134	0.922436	690	0.0101082	0.0194789	0.603983	0.904509	675	0.0119094	0.0198731	0.549201	0.903802	675	0.0117574	0.0198896	0.554637	0.898597
SMa C42:3	739	0.00757749	0.0232409	0.744487	0.915281	694	0.0146948	0.0244969	0.548802	0.904509	679	0.0242565	0.0247915	0.32823	0.875139	679	0.0245527	0.0248031	0.322588	0.862414
SMa C42:4	481	0.02349	0.0250798	0.349441	0.732414	455	0.0373451	0.0259192	0.150351	0.744689	447	0.0391366	0.0263171	0.137724	0.757481	447	0.0361222	0.026204	0.168775	0.817129
SMa C42:5	434	-0.0413611	0.0421993	0.327579	0.730132	410	-0.00396018	0.0446902	0.929434	0.964553	404	0.00163421	0.0449884	0.971042	0.996914	404	0.0012439	0.0450949	0.978008	0.992251
SMa C42:6	727	0.0286206	0.0226233	0.206253	0.590505	683	0.0483275	0.0235617	0.040652	0.556989	669	0.0475589	0.0239163	0.0471743	0.644854	669	0.0468246	0.0238963	0.0504876	0.630618
SMa C43:2	689	-0.0406488	0.0265257	0.125886	0.550289	650	-0.0294347	0.0280893	0.29509	0.86088	637	-0.0246819	0.0283455	0.384231	0.903802	637	-0.0250786	0.0283696	0.377047	0.868098
SMa C44:6	435	0.0395904	0.0391509	0.312485	0.730132	416	0.0629336	0.0406451	0.122329	0.744689	411	0.0635098	0.0410198	0.122366	0.72832	411	0.0603169	0.0409348	0.141427	0.790366
SMa C21:2	470	0.0610979	0.0561071	0.276748	0.704226	444	0.0567514	0.057272	0.322293	0.86088	436	0.0574277	0.0580869	0.32341	0.875139	436	0.0600821	0.0581969	0.302491	0.862189
SMa C31:1	401	0.0257812	0.0544982	0.636432	0.904859	377	0.0373525	0.0572978	0.514882	0.904509	371	0.0529374	0.058121	0.363019	0.903802	371	0.0527884	0.0583424	0.366192	0.862414
SMa C35:2	644	-0.0278524	0.0287699	0.333362	0.730132	601	-0.0160801	0.0304204	0.597289	0.904509	588	-0.0121805	0.0309992	0.694519	0.942562	588	-0.0119883	0.0310295	0.699381	0.934375
SMa C37:2	436	-0.0153209	0.0346112	0.658239	0.91328	416	0.0167498	0.0364497	0.646103	0.904509	410	0.0165496	0.0371074	0.655851	0.942562	410	0.0181358	0.0372379	0.626514	0.915674
SMa C37:3	708	0.00842708	0.0357375	0.813654	0.939523	665	0.00301706	0.0377752	0.936367	0.964553	651	-0.00203997	0.038417	0.957669	0.995785	651	-0.00209809	0.0384661	0.956519	0.990143
SMa C39:4	516	0.00914543	0.033672	0.786038	0.930383	485	0.00523384	0.0352605	0.882065	0.964553	478	-3.7331e-05	0.0360084	0.999173	0.999173	478	-0.00325561	0.0361006	0.928183	0.987532
SMa C39:5	684	0.00717081	0.0284836	0.80131	0.934192	646	0.0117722	0.0300204	0.695088	0.913768	633	0.0100787	0.0305617	0.741678	0.956373	633	0.00966708	0.030597	0.752151	0.948342
SMa C41:5	558	-0.023759	0.0344907	0.491211	0.803433	526	-0.0216753	0.0366914	0.554955	0.904509	519	-0.0380446	0.0370041	0.304395	0.875139	519	-0.0377151	0.0371224	0.310142	0.862189
SMa C43:0	350	-0.0121561	0.0351593	0.72975	0.91328	331	-0.0157292	0.0372481	0.673108	0.90761	326	-0.023728	0.0382682	0.535689	0.903802	326	-0.0317408	0.0380108	0.404342	0.876462

## Sheet: Factor8
	Crude model					Main model					Main model +					Main model ++
	Not Adjusted					Adjusted for city, sex, gestational age, smoking, materanl education, maternal age					Main model, further adjusted for maternal BMI, and maternal gestational weight gain					Main model +, further adjusted for birth weight
Metabolite	n	beta	se	p	p_fdr	n	beta	se	p	p_fdr	n	beta	se	p	p_fdr	n	beta	se	p	p_fdr
Ala	736	-0.021292	0.0188229	0.258359	0.909475	691	-0.030795	0.019399	0.112885	0.981975	676	-0.0239023	0.0196376	0.223981	0.99175	676	-0.0246338	0.0195781	0.208759	0.996295
Arg	737	-0.00216037	0.0358031	0.951901	0.980036	692	0.00329283	0.036569	0.928279	0.981975	677	-0.000564122	0.0372808	0.987932	0.99175	677	0.000616725	0.037206	0.98678	0.996295
Asn	736	-0.00787774	0.0202966	0.698034	0.975335	691	-0.00664103	0.0205199	0.746314	0.981975	676	0.00174511	0.0208573	0.933345	0.99175	676	0.00157111	0.020869	0.940012	0.996295
Asp	734	-0.0222071	0.031472	0.480657	0.909475	689	-0.0148865	0.0313371	0.634913	0.981975	674	-0.00392713	0.0319479	0.902206	0.99175	674	-0.00424239	0.0319429	0.894384	0.996295
Cit	729	-0.0355798	0.0225029	0.114295	0.909475	684	-0.0226108	0.0236752	0.339906	0.981975	670	-0.0187429	0.0238626	0.432479	0.99175	670	-0.018498	0.0238737	0.438725	0.996295
Gln	715	-0.0117677	0.029731	0.692371	0.975335	674	-0.0104772	0.0308069	0.733897	0.981975	660	0.00125943	0.0307968	0.967393	0.99175	660	0.00120332	0.0308306	0.968879	0.996295
Glu	671	-0.0174331	0.0205025	0.395475	0.909475	629	-0.0170573	0.0214979	0.427831	0.981975	616	-0.0121595	0.0216579	0.574715	0.99175	616	-0.0122355	0.021683	0.572771	0.996295
Gly	738	-0.012434	0.0181752	0.494121	0.909475	693	-0.00571676	0.0185978	0.758643	0.981975	678	0.0016946	0.0188702	0.928471	0.99175	678	0.00171193	0.0188873	0.927807	0.996295
His	737	-0.0213533	0.0170363	0.210469	0.909475	692	-0.0329945	0.0177154	0.0629751	0.981975	677	-0.0275189	0.0178616	0.123883	0.99175	677	-0.0266184	0.0177153	0.133437	0.996295
Ile	735	-0.00312716	0.0153465	0.83859	0.975335	690	-0.00768691	0.0162789	0.636939	0.981975	675	-0.00429405	0.0164937	0.79468	0.99175	675	-0.00391177	0.0164848	0.812502	0.996295
Leu	736	-0.0121223	0.0151949	0.425259	0.909475	691	-0.0119246	0.0158539	0.452224	0.981975	676	-0.010263	0.0160914	0.52383	0.99175	676	-0.0102489	0.0161059	0.524778	0.996295
Lys	610	-0.00526624	0.0161599	0.744627	0.975335	573	-0.00518951	0.0166939	0.756023	0.981975	560	-0.000654524	0.0169154	0.969149	0.99175	560	-0.000766987	0.0169488	0.963922	0.996295
Met	736	-0.0172401	0.0179994	0.338479	0.909475	691	-0.0187053	0.0183066	0.307258	0.981975	676	-0.0119813	0.018566	0.518938	0.99175	676	-0.0122401	0.0185736	0.510125	0.996295
Orn	736	-0.00735766	0.0235897	0.755206	0.975335	691	-0.00821326	0.0229765	0.720859	0.981975	676	-0.000255398	0.0233461	0.991275	0.99175	676	-0.00039814	0.0233651	0.98641	0.996295
Phe	738	-0.0168649	0.0144758	0.244388	0.909475	693	-0.0185554	0.0147588	0.209106	0.981975	678	-0.0165846	0.0150027	0.269379	0.99175	678	-0.0168259	0.0150056	0.26257	0.996295
Pro	737	-0.0252586	0.0158368	0.111166	0.909475	692	-0.0282268	0.0165248	0.0880746	0.981975	677	-0.0241105	0.0167942	0.151584	0.99175	677	-0.0241597	0.0168091	0.151115	0.996295
Trp	733	0.0161485	0.0140995	0.252458	0.909475	688	0.00890922	0.0149411	0.551185	0.981975	673	0.00611097	0.0151858	0.687512	0.99175	673	0.00626024	0.0151927	0.680435	0.996295
Ser	736	-0.0038234	0.0200492	0.848814	0.975335	691	-0.00430734	0.020265	0.831743	0.981975	676	0.00136213	0.0206709	0.947481	0.99175	676	0.00125622	0.020688	0.951599	0.996295
Thr	736	-0.00755265	0.0176405	0.668676	0.975335	691	-0.00784577	0.0186334	0.673848	0.981975	676	-0.00178577	0.018649	0.923743	0.99175	676	-0.00144124	0.0186415	0.938398	0.996295
Tyr	735	0.00174144	0.0146426	0.905364	0.975335	690	-0.00422279	0.0150997	0.779825	0.981975	675	-0.00144504	0.0152576	0.924574	0.99175	675	-0.00141498	0.0152712	0.926205	0.996295
Val	734	-0.00637551	0.0126774	0.615186	0.949213	689	-0.012635	0.0132991	0.342428	0.981975	674	-0.012255	0.0135123	0.364773	0.99175	674	-0.0123465	0.0135227	0.361573	0.996295
NEFA C12:0	736	0.00605367	0.0442887	0.891317	0.975335	691	0.010492	0.046711	0.822348	0.981975	676	0.00736674	0.0467961	0.874961	0.99175	676	0.0064038	0.0467808	0.891161	0.996295
NEFA C14:0	736	-0.0205284	0.0393019	0.601605	0.945379	691	-0.0113105	0.0414224	0.784898	0.981975	676	-0.0142303	0.0421158	0.735559	0.99175	676	-0.0149555	0.0421227	0.72267	0.996295
NEFA C14:1	738	-0.0302791	0.0464219	0.514442	0.909475	693	-0.0192568	0.0488172	0.693362	0.981975	678	-0.0226647	0.0496952	0.648489	0.99175	678	-0.0238143	0.0496684	0.63177	0.996295
NEFA C15:0	734	-0.050874	0.0338447	0.133239	0.909475	690	-0.0373942	0.0351168	0.28733	0.981975	675	-0.0354498	0.0356489	0.320393	0.99175	675	-0.0362055	0.0356412	0.31009	0.996295
NEFA C15:1	637	-0.0547083	0.0437822	0.211933	0.909475	599	-0.042389	0.0457142	0.35418	0.981975	587	-0.0454291	0.046428	0.328256	0.99175	587	-0.047027	0.0464309	0.311574	0.996295
NEFA C16:0	736	-0.00257135	0.0230178	0.911084	0.975335	691	-0.0012429	0.0241965	0.959049	0.981975	676	-0.000787757	0.0246503	0.974516	0.99175	676	-0.00185664	0.0245541	0.939749	0.996295
NEFA C16:1	739	-0.0128869	0.0400428	0.747675	0.975335	694	-0.00590659	0.0422079	0.888749	0.981975	679	-0.00874674	0.0428452	0.838302	0.99175	679	-0.00982663	0.0428024	0.818489	0.996295
NEFA C17:0	734	-0.0325448	0.0228846	0.155426	0.909475	690	-0.0273916	0.0235369	0.244934	0.981975	675	-0.0251372	0.023934	0.293985	0.99175	675	-0.0262684	0.0238322	0.270775	0.996295
NEFA C17:1	735	-0.0298896	0.0309209	0.334047	0.909475	691	-0.0247519	0.0322373	0.442876	0.981975	676	-0.023669	0.032786	0.470601	0.99175	676	-0.024326	0.0327825	0.45833	0.996295
NEFA C18:0	733	0.00163299	0.0195419	0.933427	0.975335	688	0.00238219	0.0204614	0.907352	0.981975	673	0.00299988	0.0209192	0.886017	0.99175	673	0.00204247	0.0208251	0.921901	0.996295
NEFA C18:1	736	-0.00442835	0.0294507	0.880519	0.975335	691	-0.00410203	0.0311275	0.895197	0.981975	676	-0.00707936	0.0316018	0.822815	0.99175	676	-0.00766498	0.0316032	0.80844	0.996295
NEFA C18:2	736	-0.0312889	0.0302244	0.300916	0.909475	691	-0.0317064	0.0321385	0.324219	0.981975	676	-0.0347252	0.0325777	0.286857	0.99175	676	-0.0358902	0.0325009	0.26988	0.996295
NEFA C18:3	735	-0.0274545	0.0380102	0.470351	0.909475	690	-0.0293435	0.0402515	0.466257	0.981975	676	-0.0379866	0.0410167	0.354726	0.99175	676	-0.0390577	0.040983	0.340934	0.996295
NEFA C20:0	580	-0.0019301	0.0248034	0.938002	0.975335	551	-0.00334489	0.0253608	0.89512	0.981975	540	-0.00698355	0.0258348	0.787026	0.99175	540	-0.00717509	0.0258535	0.781486	0.996295
NEFA C20:1	736	-0.0320367	0.0244348	0.190241	0.909475	691	-0.0346921	0.0255695	0.175312	0.981975	676	-0.0365411	0.0259304	0.159256	0.99175	676	-0.0367125	0.0259515	0.15765	0.996295
NEFA C20:2	643	-0.0241872	0.0290131	0.404787	0.909475	606	-0.0331698	0.0304903	0.277097	0.981975	593	-0.0365446	0.0309832	0.238693	0.99175	593	-0.0386669	0.0308405	0.210442	0.996295
NEFA C20:3	694	-0.0107157	0.0253159	0.672226	0.975335	656	-0.0132102	0.0269206	0.623802	0.981975	643	-0.0129973	0.0274608	0.636164	0.99175	643	-0.0136193	0.0274575	0.620063	0.996295
NEFA C20:4	736	-0.0185342	0.0245754	0.450989	0.909475	691	-0.0154861	0.0258786	0.549768	0.981975	676	-0.016732	0.0263678	0.525937	0.99175	676	-0.0175132	0.0263359	0.506292	0.996295
NEFA C22:0	604	-0.097394	0.0383927	0.0114451	0.909475	573	-0.0825612	0.0403384	0.0411607	0.981975	561	-0.0913282	0.041311	0.0274746	0.99175	561	-0.0917814	0.0413638	0.0269137	0.996295
NEFA C22:1	646	-0.0343496	0.0297849	0.249244	0.909475	608	-0.0380891	0.031378	0.225284	0.981975	596	-0.0422596	0.0320332	0.187618	0.99175	596	-0.0413153	0.0320627	0.198068	0.996295
NEFA C22:2	635	-0.0290534	0.025243	0.250198	0.909475	598	-0.0316239	0.026585	0.234719	0.981975	586	-0.0386981	0.0271609	0.154779	0.99175	586	-0.0389405	0.0271943	0.15272	0.996295
NEFA C22:6	736	-0.0132354	0.0243669	0.58718	0.934648	691	-0.011195	0.025493	0.660703	0.981975	676	-0.0149506	0.0259893	0.565315	0.99175	676	-0.0171672	0.0254345	0.499944	0.996295
NEFA C24:1	695	-0.0201989	0.018811	0.283304	0.909475	657	-0.0142144	0.0195191	0.466744	0.981975	644	-0.0195814	0.0198273	0.323737	0.99175	644	-0.0195242	0.0198471	0.325634	0.996295
NEFA C16:2	671	-0.0254717	0.033848	0.452002	0.909475	629	-0.0165966	0.0356434	0.641649	0.981975	616	-0.0206819	0.0361823	0.567808	0.99175	616	-0.0231072	0.036004	0.521257	0.996295
NEFA C16:3	589	-0.0107439	0.032295	0.739497	0.975335	555	-0.00053816	0.0341443	0.987431	0.987431	545	-0.00554095	0.0345973	0.872821	0.99175	545	-0.00592028	0.0343637	0.863282	0.996295
NEFA C18:4	660	-0.075341	0.0420425	0.0736006	0.909475	618	-0.0733537	0.0444104	0.0991202	0.981975	605	-0.0744671	0.0452894	0.100668	0.99175	605	-0.0784849	0.0450261	0.0818488	0.996295
NEFA C19:1	736	-0.031953	0.0276829	0.248783	0.909475	691	-0.027906	0.0286679	0.330697	0.981975	676	-0.0247622	0.0291819	0.396446	0.99175	676	-0.0255073	0.0291601	0.382044	0.996295
NEFA C20:5	668	-0.0469214	0.0386883	0.225643	0.909475	626	-0.0529103	0.0409444	0.196767	0.981975	611	-0.0630407	0.0414997	0.129285	0.99175	611	-0.0699372	0.0407257	0.0864589	0.996295
NEFA C22:3	565	-0.040395	0.027001	0.135213	0.909475	534	-0.0458852	0.0277553	0.0989039	0.981975	523	-0.0485999	0.0282179	0.085635	0.99175	523	-0.0487607	0.0282561	0.0850285	0.996295
NEFA C22:4	736	-0.00672139	0.0221358	0.761487	0.975335	691	-0.00128382	0.0232553	0.955991	0.981975	676	-0.00466765	0.0236405	0.843543	0.99175	676	-0.00588982	0.0234716	0.801945	0.996295
NEFA C22:5	737	-0.00523426	0.0251759	0.83536	0.975335	692	-0.00404422	0.0263585	0.878105	0.981975	677	-0.00599002	0.0268376	0.823454	0.99175	677	-0.00727997	0.0266751	0.785008	0.996295
NEFA C24:2	540	-0.0663707	0.0220862	0.00278196	0.58143	505	-0.0685471	0.0235132	0.00371908	0.777287	494	-0.0652136	0.0239306	0.0066676	0.99175	494	-0.068102	0.023722	0.00427899	0.894309
NEFA C24:3	561	-0.0162726	0.0231086	0.481623	0.909475	530	-0.0163753	0.0235833	0.487774	0.981975	518	-0.0110146	0.0239844	0.646263	0.99175	518	-0.011075	0.0240082	0.644788	0.996295
NEFA C24:4	737	-0.0257967	0.0220476	0.242372	0.909475	692	-0.0246183	0.0230821	0.28656	0.981975	677	-0.0260236	0.0234966	0.268467	0.99175	677	-0.0272142	0.0233361	0.243969	0.996295
NEFA C26:0	605	-0.0496502	0.0290503	0.0879563	0.909475	577	-0.0478014	0.0302437	0.114553	0.981975	565	-0.0439415	0.030861	0.155065	0.99175	565	-0.0442627	0.0308327	0.151702	0.996295
NEFA C26:3	637	-0.0209937	0.0214662	0.328461	0.909475	598	-0.0246072	0.0224192	0.272841	0.981975	585	-0.0210835	0.0227335	0.354109	0.99175	585	-0.0207852	0.0227597	0.361508	0.996295
NEFA C26:4	530	-0.0182244	0.0218762	0.405192	0.909475	492	-0.0206744	0.0233325	0.37603	0.981975	483	-0.0238522	0.0234823	0.31028	0.99175	483	-0.0244678	0.0233698	0.295657	0.996295
C14:0	723	0.00214206	0.0170513	0.900064	0.975335	679	0.00701494	0.0174599	0.687978	0.981975	664	0.00685374	0.0176442	0.697816	0.99175	664	0.00570113	0.0175938	0.746011	0.996295
C15:1	725	-0.0270782	0.0292174	0.354347	0.909475	681	-0.0382861	0.0294631	0.194232	0.981975	666	-0.0278011	0.0297777	0.350843	0.99175	666	-0.0287473	0.0297968	0.335013	0.996295
C16:0	733	0.00406198	0.0114343	0.722509	0.975335	689	0.00332674	0.0119731	0.781212	0.981975	674	0.00465806	0.0122326	0.70348	0.99175	674	0.00468662	0.0122459	0.702058	0.996295
C16:1 n7	732	0.00112579	0.0167568	0.946453	0.979251	689	0.00625113	0.0174899	0.720892	0.981975	674	0.00877187	0.0177953	0.622224	0.99175	674	0.00869968	0.0178154	0.625483	0.996295
C17:0	722	-0.013073	0.0181951	0.472687	0.909475	678	-0.0152024	0.0185525	0.412835	0.981975	663	-0.0129743	0.0187852	0.490021	0.99175	663	-0.0148902	0.0186399	0.424677	0.996295
C18:0	733	0.00131845	0.0116459	0.909894	0.975335	689	-0.000652012	0.0120778	0.956963	0.981975	674	-0.000127367	0.0123138	0.99175	0.99175	674	-0.000204746	0.0123267	0.986753	0.996295
C18:1 n9	732	-0.00691306	0.0116635	0.55356	0.909475	688	-0.00664971	0.0123461	0.590334	0.981975	673	-0.006544	0.0125827	0.603183	0.99175	673	-0.00648272	0.0125973	0.606998	0.996295
C18:1 n7	734	0.000295178	0.0137215	0.982843	0.987568	690	0.000922385	0.0141526	0.948054	0.981975	675	0.00113711	0.0143834	0.937011	0.99175	675	0.0015304	0.0143855	0.915309	0.996295
C18:2 n6	733	-0.0121465	0.0154012	0.430561	0.909475	689	-0.0114421	0.0163228	0.48355	0.981975	674	-0.0113616	0.0166642	0.495607	0.99175	674	-0.0126189	0.0165764	0.446773	0.996295
C18:3 n6	722	-0.037218	0.021029	0.0771759	0.909475	678	-0.0337427	0.0218924	0.123717	0.981975	663	-0.0301832	0.0222289	0.174986	0.99175	663	-0.0306495	0.0222477	0.168785	0.996295
C18:3 n3	717	-0.0291502	0.0328887	0.37574	0.909475	674	-0.0318009	0.0341406	0.351949	0.981975	659	-0.0398439	0.0346485	0.25059	0.99175	659	-0.0441958	0.0342809	0.197781	0.996295
C20:1 n9	694	-0.0347225	0.0288796	0.229651	0.909475	651	-0.0434567	0.0301915	0.150534	0.981975	636	-0.0454911	0.0308075	0.140281	0.99175	636	-0.046505	0.0308193	0.131815	0.996295
C20:2 n6	720	-0.0182922	0.0209132	0.382044	0.909475	676	-0.0244722	0.0220611	0.267705	0.981975	661	-0.0235034	0.0224824	0.296222	0.99175	661	-0.0228619	0.0224983	0.309931	0.996295
C20:3 n9	734	0.012639	0.0328288	0.700351	0.975335	690	0.0168302	0.0338892	0.619615	0.981975	675	0.0234888	0.0339576	0.489362	0.99175	675	0.0297151	0.0324799	0.360588	0.996295
C20:3 n6	732	0.0103832	0.0159748	0.515915	0.909475	688	0.00721203	0.016591	0.663922	0.981975	673	0.00952585	0.0169924	0.575264	0.99175	673	0.0108651	0.0168721	0.519817	0.996295
C20:4 n6	732	0.0082403	0.0130861	0.529089	0.909475	688	0.00525489	0.0134498	0.696139	0.981975	673	0.0056422	0.0136617	0.679744	0.99175	673	0.00543744	0.0136723	0.690981	0.996295
C20:3 n3	714	-0.0133766	0.0227655	0.556999	0.909475	670	-0.0141558	0.0238358	0.552791	0.981975	655	-0.0125363	0.0243565	0.606938	0.99175	655	-0.0128869	0.0243811	0.597294	0.996295
C20:5 n3	729	0.00851505	0.0298657	0.77564	0.975335	685	0.00375176	0.03124	0.904444	0.981975	670	0.0107601	0.0318169	0.73533	0.99175	670	0.00797462	0.03158	0.800717	0.996295
C22:4 n6	716	0.00368895	0.017778	0.835677	0.975335	672	-0.000958208	0.0185809	0.958887	0.981975	657	-0.00174419	0.0189335	0.92663	0.99175	657	-0.0014795	0.0189513	0.937798	0.996295
C22:5 n6	734	0.00502267	0.0232884	0.829303	0.975335	690	0.00146139	0.02449	0.952434	0.981975	675	0.00144878	0.0247331	0.953307	0.99175	675	0.0048631	0.0241403	0.840408	0.996295
C22:5 n3	731	0.000695551	0.0295915	0.981254	0.987568	687	-0.0068783	0.0297122	0.816998	0.981975	672	-0.0042624	0.0301147	0.887487	0.99175	672	-0.00621047	0.0300171	0.836154	0.996295
C22:6 n3	734	-0.00323037	0.0179265	0.857045	0.975335	690	-0.00774694	0.0182702	0.671685	0.981975	675	-0.00580787	0.0185074	0.753761	0.99175	675	-0.00691788	0.0184451	0.707741	0.996295
AC C10:0	673	-0.011635	0.0294135	0.692553	0.975335	635	-0.0140598	0.0305121	0.64511	0.981975	621	-0.0141003	0.0310585	0.65	0.99175	621	-0.0144475	0.03103	0.641675	0.996295
AC C10:1	650	-0.0173499	0.0288455	0.547739	0.909475	616	-0.0114033	0.0297299	0.70144	0.981975	602	-0.00928233	0.030378	0.760049	0.99175	602	-0.00965912	0.0303564	0.750456	0.996295
AC C12:0	682	0.0183706	0.0303918	0.545744	0.909475	644	0.0108482	0.0316878	0.732205	0.981975	631	0.016615	0.0322378	0.606468	0.99175	631	0.0144936	0.0321462	0.652249	0.996295
AC C14:1	733	0.00253981	0.0266108	0.92399	0.975335	691	-0.00285011	0.0280113	0.918987	0.981975	676	-0.00252845	0.0284136	0.92912	0.99175	676	-0.0032985	0.028372	0.907483	0.996295
AC C16:0	738	0.0331578	0.0308181	0.282324	0.909475	693	0.0255872	0.0322135	0.427302	0.981975	678	0.0326811	0.0325266	0.315389	0.99175	678	0.0326578	0.032557	0.316187	0.996295
AC C18:1	693	0.0116052	0.0337804	0.731293	0.975335	655	0.0117298	0.0343212	0.732642	0.981975	642	0.016297	0.0341759	0.633634	0.99175	642	0.0155239	0.0341844	0.649901	0.996295
AC C2:0	735	-0.0166574	0.0234341	0.477429	0.909475	690	-0.0281019	0.0246698	0.255064	0.981975	675	-0.0254094	0.0251306	0.312348	0.99175	675	-0.0264195	0.0250171	0.291337	0.996295
AC C3:0	737	0.0279957	0.0265632	0.29227	0.909475	692	0.0144981	0.0276026	0.599589	0.981975	677	0.00870533	0.0278123	0.754379	0.99175	677	0.00855387	0.027835	0.758709	0.996295
AC C8:1	736	-0.0660125	0.0408681	0.106694	0.909475	692	-0.0738136	0.0435489	0.0905499	0.981975	677	-0.0769742	0.0437622	0.0790619	0.99175	677	-0.078546	0.0436294	0.0722777	0.996295
H1	719	0.0229089	0.0704623	0.745186	0.975335	674	-0.0085661	0.0732294	0.906915	0.981975	659	-0.0254535	0.0746389	0.733201	0.99175	659	-0.0244143	0.0746046	0.743588	0.996295
LPCa C14:0	736	0.0336578	0.0218417	0.12376	0.909475	692	0.025729	0.022787	0.259258	0.981975	677	0.0279447	0.023096	0.226744	0.99175	677	0.0301076	0.0225586	0.182462	0.996295
LPCa C16:0	737	0.0229204	0.0175168	0.191129	0.909475	692	0.0183356	0.0182182	0.314566	0.981975	677	0.0184299	0.0185568	0.321001	0.99175	677	0.0200932	0.0182603	0.271576	0.996295
LPCa C16:1	737	0.0295069	0.0228392	0.196792	0.909475	692	0.0110518	0.0234059	0.636954	0.981975	677	0.0128923	0.0238733	0.58936	0.99175	677	0.017199	0.0222811	0.440448	0.996295
LPCa C18:0	738	0.0196769	0.0206375	0.340681	0.909475	693	0.0165865	0.0216851	0.444612	0.981975	678	0.0166893	0.0220542	0.449479	0.99175	678	0.0175099	0.0220043	0.42647	0.996295
LPCa C18:1	739	0.0322864	0.0207517	0.120183	0.909475	694	0.0165762	0.0211467	0.433396	0.981975	679	0.0146679	0.0215055	0.495447	0.99175	679	0.0177672	0.0202472	0.380531	0.996295
LPCa C18:2	736	0.0231623	0.023959	0.333994	0.909475	691	0.00389735	0.0245747	0.874039	0.981975	676	0.0042637	0.0250505	0.864902	0.99175	676	0.0061292	0.0243345	0.801219	0.996295
LPCa C18:3	604	-0.026843	0.0382093	0.482629	0.909475	576	-0.0519	0.0390655	0.184548	0.981975	564	-0.0506381	0.039702	0.202698	0.99175	564	-0.0481558	0.0389988	0.217443	0.996295
LPCa C20:3	736	0.0308619	0.0257651	0.231383	0.909475	691	0.00347753	0.0264015	0.895248	0.981975	676	0.00480234	0.0269818	0.858791	0.99175	676	0.00732648	0.0257404	0.776019	0.996295
LPCa C20:4	735	0.0244651	0.023378	0.295681	0.909475	690	0.00348321	0.0236733	0.883069	0.981975	675	0.00271945	0.024163	0.910425	0.99175	675	0.00458029	0.0235649	0.845948	0.996295
LPCa C22:6	668	0.00757138	0.0264256	0.774573	0.975335	629	-0.0091461	0.0277503	0.741827	0.981975	616	-0.00921056	0.0281386	0.743535	0.99175	616	-0.00711588	0.0278546	0.798453	0.996295
LPCe C16:0	692	0.00598161	0.028232	0.83227	0.975335	654	0.0127706	0.0295181	0.665428	0.981975	641	0.0191381	0.0298452	0.521603	0.99175	641	0.0225287	0.0296534	0.447704	0.996295
LPCe C18:0	733	-0.00951268	0.0282208	0.736155	0.975335	688	-0.0155103	0.0291617	0.594993	0.981975	673	-0.0102249	0.0291575	0.725944	0.99175	673	-0.010183	0.0291826	0.727247	0.996295
LPCe C18:1	411	-0.0123893	0.0389868	0.750817	0.975335	389	-0.00469163	0.0407802	0.90847	0.981975	383	0.00337534	0.0410007	0.934434	0.99175	383	0.00188938	0.0406984	0.962998	0.996295
PCa C28:2	560	0.00453204	0.0395542	0.908822	0.975335	531	0.00525014	0.0416375	0.899709	0.981975	521	0.00590154	0.0419577	0.8882	0.99175	521	0.00456732	0.0420115	0.913472	0.996295
PCa C30:0	737	-0.000787231	0.0257911	0.975658	0.987568	692	-0.00734689	0.0270839	0.786272	0.981975	677	-0.0032437	0.0275832	0.906424	0.99175	677	-0.00318922	0.0276087	0.908073	0.996295
PCa C30:2	700	0.0578062	0.0244968	0.0185673	0.909475	660	0.0507521	0.0257228	0.0489233	0.981975	645	0.0503804	0.0260769	0.0538155	0.99175	645	0.0499291	0.0260993	0.056203	0.996295
PCa C32:0	739	0.0311848	0.0221636	0.15985	0.909475	694	0.0259956	0.0230761	0.26035	0.981975	679	0.0289425	0.0235827	0.220161	0.99175	679	0.02828	0.0235523	0.230293	0.996295
PCa C32:1	737	0.0204948	0.0289032	0.478502	0.909475	692	0.0118623	0.0299929	0.692598	0.981975	677	0.0183245	0.0304909	0.54806	0.99175	677	0.019969	0.0303078	0.51021	0.996295
PCa C32:2	733	-0.0126099	0.0234108	0.590304	0.934648	688	-0.0199896	0.0249281	0.422905	0.981975	673	-0.0203024	0.0254111	0.424609	0.99175	673	-0.0198012	0.0254181	0.436254	0.996295
PCa C32:3	727	0.0355153	0.0238288	0.136554	0.909475	683	0.0301938	0.0248073	0.22399	0.981975	668	0.0281855	0.025292	0.265522	0.99175	668	0.0293031	0.0252184	0.24568	0.996295
PCa C34:1	738	0.0222485	0.0198859	0.263596	0.909475	693	0.0167476	0.0206198	0.416961	0.981975	678	0.0195133	0.0210176	0.353531	0.99175	678	0.0200354	0.0210063	0.340548	0.996295
PCa C34:2	736	0.0157517	0.0220469	0.475173	0.909475	691	0.0136041	0.023293	0.559388	0.981975	676	0.0170657	0.0238332	0.474219	0.99175	676	0.0164927	0.0238262	0.489053	0.996295
PCa C34:3	738	-0.00849552	0.0234766	0.717554	0.975335	693	-0.00743631	0.0249235	0.765517	0.981975	678	-0.000644312	0.0253903	0.979763	0.99175	678	-0.00025605	0.0253998	0.99196	0.996295
PCa C34:4	736	0.0434933	0.0264085	0.100007	0.909475	692	0.0356519	0.0281024	0.205011	0.981975	677	0.0431139	0.028367	0.129032	0.99175	677	0.0438055	0.0283647	0.122987	0.996295
PCa C34:5	493	0.0382969	0.0542741	0.480766	0.909475	465	0.0505497	0.0579511	0.383525	0.981975	455	0.0506209	0.0593564	0.394226	0.99175	455	0.051603	0.0596176	0.387209	0.996295
PCa C36:1	736	0.0202474	0.0202065	0.316668	0.909475	691	0.0158252	0.0210575	0.452603	0.981975	676	0.0198954	0.0213854	0.352548	0.99175	676	0.0204967	0.0213671	0.337783	0.996295
PCa C36:2	735	0.0104997	0.0210844	0.618647	0.949213	690	0.00690501	0.022261	0.756518	0.981975	675	0.0109419	0.022787	0.631259	0.99175	675	0.0106487	0.022801	0.640636	0.996295
PCa C36:3	736	0.0244118	0.0213228	0.252645	0.909475	691	0.0184566	0.0221403	0.404792	0.981975	676	0.0249721	0.0226135	0.269871	0.99175	676	0.0264015	0.0224397	0.239805	0.996295
PCa C36:4	737	0.0172088	0.01974	0.383623	0.909475	692	0.0114717	0.0204383	0.574794	0.981975	677	0.0152241	0.020756	0.46353	0.99175	677	0.0149429	0.0207664	0.472048	0.996295
PCa C36:5	738	0.0141074	0.0253276	0.577703	0.928768	693	0.0155079	0.0264663	0.558107	0.981975	678	0.0233509	0.0268256	0.384364	0.99175	678	0.0216774	0.026601	0.415423	0.996295
PCa C36:6	673	-0.00600846	0.0370325	0.87116	0.975335	629	0.00218531	0.0390586	0.9554	0.981975	619	0.0128431	0.0392725	0.743765	0.99175	619	0.0111293	0.039312	0.777197	0.996295
PCa C38:0	733	0.0347628	0.0258218	0.178646	0.909475	689	0.0293008	0.0270717	0.279494	0.981975	674	0.0338334	0.0274948	0.218942	0.99175	674	0.032966	0.0274621	0.230418	0.996295
PCa C38:2	612	0.0173946	0.0342927	0.612175	0.949213	579	0.0139477	0.0362128	0.700266	0.981975	568	0.0238769	0.0366203	0.514668	0.99175	568	0.0236438	0.0366541	0.519166	0.996295
PCa C38:3	736	0.0243741	0.0201772	0.227443	0.909475	691	0.0193484	0.0208513	0.353784	0.981975	676	0.0248967	0.0212407	0.241579	0.99175	676	0.0255753	0.0211953	0.228008	0.996295
PCa C38:4	737	0.0191372	0.0193399	0.322742	0.909475	692	0.0123933	0.0200044	0.535778	0.981975	677	0.016172	0.0202753	0.425382	0.99175	677	0.0155666	0.0202442	0.442209	0.996295
PCa C38:5	734	0.0187173	0.0188223	0.320352	0.909475	689	0.0123141	0.0195439	0.528862	0.981975	674	0.0175817	0.0197171	0.372886	0.99175	674	0.0178093	0.0197312	0.367078	0.996295
PCa C38:6	735	0.0237174	0.0218105	0.277213	0.909475	690	0.0188989	0.0226152	0.403639	0.981975	676	0.0149065	0.0229376	0.516004	0.99175	676	0.0138985	0.0228787	0.54374	0.996295
PCa C40:0	572	0.00327308	0.0359284	0.927446	0.975335	537	-0.00629311	0.0380535	0.868713	0.981975	527	0.00431589	0.0384038	0.910565	0.99175	527	0.000957391	0.0385367	0.98019	0.996295
PCa C40:4	698	-0.00316733	0.0239155	0.894677	0.975335	659	-0.00211777	0.0251544	0.932931	0.981975	646	0.000699102	0.0255197	0.978154	0.99175	646	0.000970984	0.0255393	0.969685	0.996295
PCa C40:5	738	-0.00347568	0.0278277	0.900638	0.975335	693	-0.0111549	0.0293453	0.703973	0.981975	678	-0.00780814	0.0296479	0.792355	0.99175	678	-0.00648544	0.0295279	0.826222	0.996295
PCa C40:6	737	0.0150441	0.0249548	0.546797	0.909475	692	0.00996954	0.0257148	0.698364	0.981975	678	0.00516848	0.0260455	0.842763	0.99175	678	0.00437638	0.0260025	0.866395	0.996295
PCa C42:0	493	0.0038541	0.0372975	0.917741	0.975335	466	0.0114582	0.0393031	0.770779	0.981975	456	0.0202653	0.0403443	0.615706	0.99175	456	0.0145234	0.0403837	0.719294	0.996295
PCa C42:1	385	-0.0553811	0.0388386	0.154723	0.909475	365	-0.0441859	0.0412252	0.284546	0.981975	357	-0.0464659	0.042456	0.27454	0.99175	357	-0.0581989	0.0422354	0.16913	0.996295
PCa C42:5	385	0.0246229	0.0393227	0.531581	0.909475	364	0.0331797	0.0414924	0.424457	0.981975	357	0.0312463	0.0424055	0.461729	0.99175	357	0.0232426	0.0424636	0.584499	0.996295
PCa C43:6	689	-0.0241296	0.0288048	0.402501	0.909475	652	-0.0169142	0.0302622	0.576415	0.981975	640	-0.017132	0.0308445	0.578801	0.99175	640	-0.0179054	0.0308354	0.561671	0.996295
PCa C44:12	690	-0.0500599	0.0287105	0.0816839	0.909475	651	-0.0512218	0.0300674	0.0889579	0.981975	638	-0.0495876	0.0306953	0.106722	0.99175	638	-0.0496304	0.0307277	0.10679	0.996295
PCe C32:0	739	0.00272082	0.0228819	0.905382	0.975335	694	-0.00204428	0.0241922	0.932683	0.981975	679	0.00225671	0.0246414	0.927058	0.99175	679	0.00270704	0.0246409	0.912554	0.996295
PCe C32:1	739	0.0138021	0.0226996	0.543356	0.909475	694	0.00653563	0.0239112	0.784685	0.981975	679	0.0103396	0.0243219	0.670893	0.99175	679	0.0103263	0.0243439	0.671572	0.996295
PCe C32:2	700	0.0282775	0.0295303	0.338616	0.909475	660	0.0159275	0.0310535	0.608196	0.981975	645	0.015591	0.0312753	0.618302	0.99175	645	0.0147087	0.0312803	0.638363	0.996295
PCe C34:0	739	-0.000787589	0.0285849	0.978027	0.987568	694	-0.000854958	0.0297229	0.977061	0.987431	679	0.0027549	0.0299905	0.926838	0.99175	679	0.00236782	0.0300038	0.937123	0.996295
PCe C34:1	737	0.0070768	0.0215934	0.743211	0.975335	692	0.000485904	0.0228089	0.98301	0.987431	677	0.00543606	0.0231762	0.814629	0.99175	677	0.00597231	0.0231597	0.796585	0.996295
PCe C34:2	737	0.0141048	0.021018	0.502383	0.909475	692	0.00691345	0.0223276	0.756934	0.981975	677	0.0126861	0.0227342	0.577024	0.99175	677	0.0125718	0.022754	0.580789	0.996295
PCe C34:3	737	0.0186064	0.0257537	0.470237	0.909475	692	0.0114749	0.0273977	0.675478	0.981975	677	0.0196059	0.0277616	0.480302	0.99175	677	0.0180422	0.027579	0.513215	0.996295
PCe C34:4	623	-0.0041406	0.048405	0.93186	0.975335	585	-0.0121114	0.0508951	0.811993	0.981975	572	-0.00218866	0.0519584	0.966416	0.99175	572	-0.00236457	0.0520639	0.963792	0.996295
PCe C36:0	590	0.0215405	0.0320315	0.50155	0.909475	554	0.00904326	0.0341074	0.791004	0.981975	543	0.0150919	0.0346496	0.663339	0.99175	543	0.0151929	0.0347497	0.662141	0.996295
PCe C36:1	737	-0.0163698	0.0244871	0.504024	0.909475	692	-0.0190263	0.025705	0.459453	0.981975	677	-0.0107081	0.0260716	0.681414	0.99175	677	-0.0111876	0.0260758	0.668037	0.996295
PCe C36:2	736	-0.0155275	0.0233838	0.506885	0.909475	691	-0.0211471	0.0246584	0.39142	0.981975	676	-0.0135231	0.0248725	0.586838	0.99175	676	-0.0142467	0.0248445	0.566549	0.996295
PCe C36:3	735	0.0126937	0.0224412	0.571814	0.926427	690	0.00592739	0.0237252	0.802792	0.981975	675	0.0129722	0.0241896	0.591956	0.99175	675	0.0138779	0.0241271	0.565358	0.996295
PCe C36:4	737	0.0387043	0.0203812	0.0579618	0.909475	692	0.0307502	0.0215123	0.153351	0.981975	677	0.0336389	0.0217939	0.123197	0.99175	677	0.034103	0.021791	0.118069	0.996295
PCe C36:5	737	0.0458399	0.0219673	0.0372643	0.909475	692	0.0357776	0.0229931	0.120179	0.981975	677	0.0371007	0.0234234	0.113699	0.99175	677	0.0363984	0.0233956	0.120247	0.996295
PCe C36:6	412	0.169663	0.0907096	0.0621599	0.909475	388	0.190092	0.0997184	0.0573918	0.981975	383	0.186057	0.100449	0.0648067	0.99175	383	0.186968	0.100941	0.0648082	0.996295
PCe C38:0	734	0.0339795	0.0282693	0.229763	0.909475	689	0.0337678	0.0294242	0.251538	0.981975	674	0.0435854	0.0298179	0.144304	0.99175	674	0.0405725	0.0294334	0.168542	0.996295
PCe C38:2	726	-0.0381596	0.039259	0.331384	0.909475	681	-0.0388225	0.0404763	0.337841	0.981975	666	-0.0337166	0.041134	0.412706	0.99175	666	-0.0341279	0.0411534	0.407253	0.996295
PCe C38:3	730	-0.0176971	0.0292827	0.545801	0.909475	685	-0.0153015	0.0305285	0.616383	0.981975	670	-0.00493118	0.0310819	0.873994	0.99175	670	-0.00636509	0.0310142	0.837456	0.996295
PCe C38:4	736	0.0114339	0.0193214	0.554188	0.909475	691	0.00644604	0.0203639	0.75169	0.981975	676	0.0145154	0.020493	0.479007	0.99175	676	0.0142082	0.0205014	0.488535	0.996295
PCe C38:5	736	0.0361226	0.0202943	0.0755087	0.909475	691	0.031205	0.0214126	0.145498	0.981975	676	0.0342241	0.0217228	0.11563	0.99175	676	0.0343719	0.0217408	0.114368	0.996295
PCe C38:6	737	0.0350698	0.0218832	0.109464	0.909475	692	0.0292055	0.0230827	0.206221	0.981975	677	0.0312084	0.0233767	0.182336	0.99175	677	0.0304744	0.0233438	0.192199	0.996295
PCe C40:0	734	-0.00381298	0.0206525	0.853575	0.975335	690	-0.00198362	0.021559	0.926719	0.981975	676	0.000756437	0.02187	0.972419	0.99175	676	-0.00010132	0.0218116	0.996295	0.996295
PCe C40:1	633	0.00663021	0.0348478	0.849166	0.975335	595	-0.0123286	0.0370909	0.739717	0.981975	585	-0.00135275	0.0377056	0.971393	0.99175	585	-0.000279161	0.037783	0.994108	0.996295
PCe C40:3	571	-0.0326633	0.0443513	0.461757	0.909475	534	-0.0233358	0.0467168	0.617631	0.981975	524	-0.0026693	0.0470179	0.95475	0.99175	524	-0.00678898	0.0470696	0.885375	0.996295
PCe C40:4	731	-0.00325966	0.0243637	0.893605	0.975335	686	-0.00352712	0.0253789	0.88951	0.981975	672	0.00648117	0.0256673	0.80073	0.99175	672	0.00552192	0.0255847	0.82919	0.996295
PCe C40:5	732	-0.00500498	0.0271409	0.853747	0.975335	687	-0.00549087	0.0280377	0.844796	0.981975	672	0.00193881	0.0284902	0.945765	0.99175	672	0.000835168	0.0284191	0.976565	0.996295
PCe C40:6	735	0.0172314	0.023296	0.459742	0.909475	690	0.0161342	0.0239056	0.499964	0.981975	675	0.0231135	0.023942	0.334707	0.99175	675	0.0213315	0.0237284	0.368994	0.996295
PCe C42:1	406	-0.0760766	0.0474077	0.109354	0.909475	382	-0.0786519	0.0495957	0.113641	0.981975	374	-0.0535217	0.0497568	0.282811	0.99175	374	-0.057837	0.0497934	0.246209	0.996295
PCe C42:2	581	0.0776183	0.0424922	0.0682792	0.909475	547	0.0718281	0.045304	0.113462	0.981975	536	0.0833062	0.0460876	0.0712614	0.99175	536	0.080696	0.046242	0.0815724	0.996295
PCe C42:3	492	-0.0328719	0.0446648	0.46211	0.909475	465	-0.0166626	0.0474627	0.725703	0.981975	456	0.00373118	0.0482819	0.938437	0.99175	456	-0.00115887	0.0484334	0.980922	0.996295
PCe C42:4	673	0.0258255	0.0285868	0.366642	0.909475	634	0.0235575	0.0299522	0.431878	0.981975	624	0.0282142	0.0305382	0.355911	0.99175	624	0.0269271	0.0304679	0.377168	0.996295
PCe C42:5	639	0.0250484	0.0300681	0.405132	0.909475	601	0.0291532	0.0311365	0.349508	0.981975	591	0.0350456	0.0316928	0.269288	0.99175	591	0.0336427	0.031728	0.28944	0.996295
PCe C42:6	665	0.0144878	0.0299851	0.629142	0.952831	627	0.0136912	0.0308649	0.657502	0.981975	612	0.0226195	0.0314641	0.47249	0.99175	612	0.020972	0.0312853	0.502901	0.996295
SMa C30:1	586	-0.0337207	0.0394654	0.393221	0.909475	550	-0.0338413	0.0418519	0.419111	0.981975	539	-0.0326271	0.0425656	0.443721	0.99175	539	-0.035455	0.0426149	0.405803	0.996295
SMa C32:1	738	-0.00256963	0.0202546	0.899081	0.975335	693	-0.00659229	0.0213006	0.757046	0.981975	678	-0.00232742	0.0216778	0.914533	0.99175	678	-0.00218426	0.0216957	0.919838	0.996295
SMa C32:2	737	-0.00987112	0.0255214	0.699034	0.975335	692	-0.0265264	0.0265375	0.317875	0.981975	677	-0.0230354	0.027017	0.39418	0.99175	677	-0.0219248	0.026929	0.415847	0.996295
SMa C33:1	737	0.00382355	0.0202469	0.850267	0.975335	692	0.00163015	0.0214323	0.939394	0.981975	677	0.00564113	0.0216547	0.794558	0.99175	677	0.00552234	0.0216732	0.798958	0.996295
SMa C34:0	730	0.0375154	0.0191924	0.0510084	0.909475	686	0.0300346	0.0199567	0.132804	0.981975	671	0.0312885	0.0203719	0.125061	0.99175	671	0.0316978	0.020377	0.120302	0.996295
SMa C34:1	737	0.0323353	0.0166844	0.0530082	0.909475	692	0.0232612	0.0176194	0.18722	0.981975	677	0.0237113	0.0179882	0.187916	0.99175	677	0.0235015	0.0179992	0.19212	0.996295
SMa C34:2	739	0.0234107	0.0199869	0.241864	0.909475	694	0.0168675	0.021017	0.42251	0.981975	679	0.0170772	0.021439	0.426002	0.99175	679	0.0175604	0.0214282	0.412802	0.996295
SMa C35:1	737	0.00692107	0.0210025	0.741847	0.975335	692	0.00211359	0.0222194	0.924245	0.981975	677	0.00653369	0.0224647	0.771264	0.99175	677	0.00607858	0.0224697	0.786844	0.996295
SMa C36:0	500	-0.0213895	0.0248914	0.39059	0.909475	475	-0.0216049	0.0248201	0.384507	0.981975	467	-0.0277341	0.0249969	0.267812	0.99175	467	-0.0271963	0.024949	0.276271	0.996295
SMa C36:1	738	0.025135	0.0179225	0.161219	0.909475	693	0.0185665	0.018708	0.321342	0.981975	678	0.0174656	0.0191283	0.36154	0.99175	678	0.0176592	0.0191405	0.356554	0.996295
SMa C36:2	739	0.0266625	0.020381	0.191222	0.909475	694	0.0192658	0.021027	0.359871	0.981975	679	0.0200452	0.0214795	0.351051	0.99175	679	0.020476	0.021475	0.3407	0.996295
SMa C36:3	671	-0.0229015	0.0293918	0.436156	0.909475	636	-0.0387631	0.0309801	0.21133	0.981975	623	-0.0359241	0.0315681	0.255582	0.99175	623	-0.0357044	0.0315986	0.258957	0.996295
SMa C38:1	618	0.0208884	0.0211863	0.324559	0.909475	580	0.0177137	0.0223771	0.428932	0.981975	570	0.0206482	0.0226276	0.361895	0.99175	570	0.020816	0.0226323	0.358112	0.996295
SMa C38:2	737	0.0156716	0.020427	0.443214	0.909475	692	0.0118784	0.0213364	0.577907	0.981975	677	0.0138629	0.0218129	0.525302	0.99175	677	0.0140426	0.0218298	0.520272	0.996295
SMa C38:3	724	-0.0184001	0.0279517	0.510573	0.909475	681	-0.0289835	0.0292623	0.322307	0.981975	666	-0.0185716	0.0296065	0.530699	0.99175	666	-0.0187086	0.0296337	0.528052	0.996295
SMa C39:1	734	-0.00574881	0.0248564	0.817163	0.975335	689	-0.00435034	0.025858	0.866446	0.981975	674	0.00327356	0.026071	0.900117	0.99175	674	0.0025803	0.0260484	0.921123	0.996295
SMa C40:1	677	0.00190636	0.0201545	0.924671	0.975335	634	-0.00657705	0.0212331	0.756853	0.981975	622	-0.00727708	0.0214899	0.735009	0.99175	622	-0.00710466	0.021485	0.741003	0.996295
SMa C40:2	738	0.0226843	0.0209337	0.278893	0.909475	693	0.0269816	0.0219289	0.218975	0.981975	678	0.0254078	0.0222807	0.25456	0.99175	678	0.0253707	0.0223013	0.255694	0.996295
SMa C40:3	451	0.0155567	0.0343723	0.651065	0.975335	423	0.0217132	0.0356796	0.543158	0.981975	415	0.0308093	0.0359049	0.39137	0.99175	415	0.0305158	0.0359516	0.396508	0.996295
SMa C40:4	728	0.0145324	0.0210978	0.491168	0.909475	684	0.0080539	0.0218069	0.712001	0.981975	669	0.0117963	0.0221184	0.593994	0.99175	669	0.0115528	0.0221366	0.60193	0.996295
SMa C40:5	664	0.0416048	0.0291477	0.153952	0.909475	625	0.0348231	0.0304806	0.253714	0.981975	612	0.0406065	0.030903	0.18936	0.99175	612	0.037865	0.0307094	0.218066	0.996295
SMa C41:1	736	0.00734482	0.0233075	0.752757	0.975335	691	0.00112673	0.0243988	0.963181	0.981975	676	0.00500008	0.0248199	0.840406	0.99175	676	0.00449467	0.0248173	0.856338	0.996295
SMa C41:2	736	-0.00581856	0.0244848	0.812228	0.975335	692	-0.00635443	0.0258844	0.806151	0.981975	677	0.00195926	0.0261409	0.940278	0.99175	677	0.0015214	0.0261485	0.953621	0.996295
SMa C42:1	738	0.0249689	0.0186818	0.181798	0.909475	693	0.0219612	0.0199424	0.271192	0.981975	678	0.0174828	0.0202812	0.388994	0.99175	678	0.0172605	0.0202931	0.395328	0.996295
SMa C42:2	735	0.0208307	0.0186879	0.265368	0.909475	690	0.0157257	0.0197376	0.425888	0.981975	675	0.0158164	0.0201521	0.432829	0.99175	675	0.0156602	0.0201691	0.437768	0.996295
SMa C42:3	739	0.0025149	0.0235775	0.915084	0.975335	694	-0.00386321	0.0248576	0.876542	0.981975	679	-0.000767875	0.0251715	0.975673	0.99175	679	-0.000461652	0.025184	0.98538	0.996295
SMa C42:4	481	-0.00142887	0.0264672	0.956969	0.980424	455	-0.00379178	0.0268199	0.887636	0.981975	447	0.00353206	0.0271091	0.896398	0.99175	447	0.00261571	0.0269544	0.922739	0.996295
SMa C42:5	434	0.0101496	0.0433257	0.814894	0.975335	410	0.0167842	0.046608	0.718956	0.981975	404	0.0260699	0.0468896	0.578545	0.99175	404	0.0258561	0.0469656	0.582274	0.996295
SMa C42:6	727	0.0253029	0.022941	0.27042	0.909475	683	0.0189867	0.0239629	0.42845	0.981975	669	0.013641	0.024272	0.574307	0.99175	669	0.0128141	0.0242513	0.597411	0.996295
SMa C43:2	689	-0.0268573	0.0267251	0.315285	0.909475	650	-0.0267738	0.0283874	0.345964	0.981975	637	-0.017128	0.0287221	0.551171	0.99175	637	-0.017516	0.0287464	0.542533	0.996295
SMa C44:6	435	-0.00060758	0.0395791	0.987759	0.987759	416	0.0010891	0.0408248	0.97873	0.987431	411	0.0111722	0.0408546	0.784642	0.99175	411	0.00873057	0.0407436	0.83044	0.996295
SMa C21:2	470	0.0931838	0.058964	0.114717	0.909475	444	0.0970375	0.0608735	0.111661	0.981975	436	0.0817068	0.0619007	0.187574	0.99175	436	0.0856831	0.0620855	0.168306	0.996295
SMa C31:1	401	0.0164794	0.0534329	0.757932	0.975335	377	0.0302289	0.057628	0.600218	0.981975	371	0.039028	0.0590234	0.508899	0.99175	371	0.0388049	0.0592737	0.513108	0.996295
SMa C35:2	644	0.00814819	0.0295581	0.782894	0.975335	601	0.00735814	0.031571	0.815792	0.981975	588	0.0118701	0.032142	0.712042	0.99175	588	0.0124068	0.0322036	0.700189	0.996295
SMa C37:2	436	-0.0179239	0.0363509	0.622212	0.949213	416	-0.0125746	0.0377147	0.738998	0.981975	410	-0.0134883	0.0382807	0.724764	0.99175	410	-0.0131236	0.0383212	0.732188	0.996295
SMa C37:3	708	0.0317712	0.0361131	0.37929	0.909475	665	0.0153916	0.038248	0.687513	0.981975	651	0.0124269	0.038892	0.749437	0.99175	651	0.0124014	0.0389278	0.750156	0.996295
SMa C39:4	516	0.0826649	0.035106	0.01892	0.909475	485	0.0655165	0.037455	0.0809153	0.981975	478	0.0647584	0.0380559	0.0895002	0.99175	478	0.0633881	0.0380665	0.0965623	0.996295
SMa C39:5	684	0.0432174	0.0286093	0.131362	0.909475	646	0.0491367	0.0302869	0.105229	0.981975	633	0.0491218	0.030878	0.112167	0.99175	633	0.0488496	0.0309064	0.114499	0.996295
SMa C41:5	558	-0.00969867	0.0348262	0.780744	0.975335	526	-0.0111005	0.0373438	0.766398	0.981975	519	-0.0162727	0.037493	0.664464	0.99175	519	-0.016077	0.0375436	0.668675	0.996295
SMa C43:0	350	0.0127432	0.0377651	0.735999	0.975335	331	0.0225148	0.0405525	0.579152	0.981975	326	0.0282801	0.0416653	0.497812	0.99175	326	0.013911	0.0416862	0.738828	0.996295

## Sheet: Factor9
	Crude model					Main model					Main model +					Main model ++
	Not Adjusted					Adjusted for city, sex, gestational age, smoking, materanl education, maternal age					Main model, further adjusted for maternal BMI, and maternal gestational weight gain					Main model +, further adjusted for birth weight
Metabolite	n	beta	se	p	p_fdr	n	beta	se	p	p_fdr	n	beta	se	p	p_fdr	n	beta	se	p	p_fdr
Ala	736	0.000245204	0.0178592	0.989049	0.996524	691	0.00430131	0.0191198	0.822074	0.960125	676	-0.00133693	0.0194446	0.945205	0.992703	676	-0.00433023	0.0194294	0.823707	0.956486
Arg	737	-0.0499294	0.0338305	0.140416	0.726271	692	-0.00984117	0.0358786	0.783946	0.944926	677	-0.00647241	0.036772	0.860337	0.984973	677	-0.00166529	0.0367776	0.963898	0.992388
Asn	736	0.0193896	0.0191907	0.31266	0.816824	691	0.0144626	0.020121	0.472528	0.858768	676	0.0120749	0.0205543	0.557096	0.910719	676	0.0112566	0.0206119	0.585171	0.912693
Asp	734	0.0255447	0.0297957	0.391549	0.819851	689	0.0123675	0.0307626	0.687791	0.943201	674	0.00881903	0.0315236	0.779751	0.960166	674	0.00648165	0.0315895	0.837493	0.956486
Cit	729	-0.0226841	0.0213591	0.288582	0.793601	684	-0.0157574	0.0233058	0.499205	0.862786	670	-0.0131898	0.0235405	0.575469	0.910719	670	-0.0120068	0.0236101	0.611246	0.913963
Gln	715	0.046554	0.0279558	0.0963086	0.671921	674	0.0414036	0.0300209	0.168321	0.723917	660	0.0374606	0.0301593	0.214663	0.776647	660	0.037502	0.0302673	0.215796	0.835209
Glu	671	-0.00051466	0.0193919	0.978835	0.996524	629	-0.0115482	0.0211585	0.585407	0.90802	616	-0.0119572	0.0214484	0.577405	0.910719	616	-0.0120764	0.0214821	0.574219	0.912693
Gly	738	-0.00707253	0.0172125	0.681272	0.968611	693	-0.0151431	0.0182508	0.406993	0.841136	678	-0.0173913	0.0186124	0.350449	0.910719	678	-0.0174032	0.0186694	0.35159	0.912693
His	737	0.00158983	0.0160747	0.921243	0.992473	692	-0.00651575	0.0173517	0.707401	0.944926	677	-0.0173411	0.0175595	0.323735	0.910719	677	-0.0133662	0.0174563	0.444136	0.912693
Ile	735	0.0117822	0.0145021	0.416805	0.847151	690	0.00771778	0.0159529	0.628697	0.925377	675	0.00168135	0.016251	0.917629	0.984973	675	0.0032117	0.0162768	0.84364	0.956486
Leu	736	0.00901027	0.0143895	0.531403	0.900515	691	0.00991485	0.0155624	0.524277	0.862786	676	0.00473717	0.0158821	0.765591	0.958135	676	0.00482802	0.0159307	0.761938	0.956486
Lys	610	0.0218125	0.0149494	0.145069	0.726271	573	0.0220625	0.0160466	0.169722	0.723917	560	0.0134664	0.0163785	0.411327	0.910719	560	0.0133655	0.0164461	0.416759	0.912693
Met	736	0.00233182	0.0170475	0.891241	0.976288	691	-0.000228263	0.0179944	0.989883	0.989883	676	-0.00577467	0.0183366	0.752919	0.953698	676	-0.00681094	0.018384	0.711145	0.952752
Orn	736	0.0242556	0.0223074	0.277254	0.783055	691	0.00299455	0.0225522	0.894405	0.973433	676	0.000570204	0.0230363	0.98026	0.999532	676	1.90427e-05	0.0231031	0.999343	0.999343
Phe	738	0.0117946	0.0137121	0.389985	0.819851	693	0.0147624	0.0144958	0.308861	0.798814	678	0.00911262	0.0148172	0.538769	0.910719	678	0.00820231	0.0148531	0.580983	0.912693
Pro	737	-0.000577655	0.0150393	0.969372	0.996524	692	-0.00778388	0.0162879	0.632883	0.925377	677	-0.00957189	0.01663	0.565098	0.910719	677	-0.00978916	0.0166811	0.557515	0.912693
Trp	733	-0.0185049	0.0133416	0.165872	0.753635	688	-0.0295684	0.0146282	0.0436468	0.482346	673	-0.0308111	0.0149414	0.0395954	0.587992	673	-0.030175	0.0149902	0.044531	0.581101
Ser	736	0.0310272	0.0189381	0.101786	0.671921	691	0.0194298	0.019872	0.328553	0.820557	676	0.0148271	0.020384	0.467251	0.910719	676	0.0144541	0.0204454	0.479846	0.912693
Thr	736	0.00276474	0.0166196	0.867925	0.976288	691	-0.000812905	0.0181962	0.96438	0.989883	676	-0.00628916	0.0183003	0.73121	0.94921	676	-0.00474138	0.0183324	0.796	0.956486
Tyr	735	-0.00780235	0.0138308	0.572842	0.913923	690	-0.00418557	0.0147904	0.77727	0.944926	675	-0.0126423	0.0150184	0.400217	0.910719	675	-0.0125762	0.0150646	0.404128	0.912693
Val	734	-0.00190084	0.0120291	0.874485	0.976288	689	-0.0041963	0.013104	0.748894	0.944926	674	-0.00898307	0.0133805	0.502234	0.910719	674	-0.00943924	0.0134256	0.482259	0.912693
NEFA C12:0	736	-0.118552	0.0418785	0.0047724	0.199486	691	-0.0978597	0.0459565	0.0335882	0.482346	676	-0.0911025	0.0462687	0.0493805	0.587992	676	-0.0961517	0.0463676	0.0385037	0.581101
NEFA C14:0	736	-0.0925994	0.0372115	0.0130556	0.272863	691	-0.0866981	0.0407507	0.0337436	0.482346	676	-0.0822822	0.0416485	0.0486199	0.587992	676	-0.0859028	0.0417593	0.0400774	0.581101
NEFA C14:1	738	-0.120514	0.0437393	0.00601245	0.209434	693	-0.106227	0.0477857	0.0265513	0.482346	678	-0.100222	0.0488869	0.0407566	0.587992	678	-0.10561	0.0489655	0.0313856	0.581101
NEFA C15:0	734	-0.0835206	0.0320794	0.00941759	0.272863	690	-0.0849219	0.0345716	0.0142884	0.373649	675	-0.0808937	0.0352733	0.022148	0.578617	675	-0.0845916	0.0353503	0.0169981	0.533781
NEFA C15:1	637	-0.0891157	0.0411692	0.0307974	0.402291	599	-0.0634717	0.0447648	0.156763	0.723917	587	-0.064701	0.045686	0.157269	0.737495	587	-0.0694341	0.0458108	0.130167	0.734937
NEFA C16:0	736	-0.0135365	0.0218776	0.536287	0.900515	691	-0.0146183	0.023877	0.540593	0.869108	676	-0.0105728	0.0244444	0.665505	0.912232	676	-0.0152937	0.024412	0.53122	0.912693
NEFA C16:1	739	-0.0887722	0.0377719	0.0190315	0.331465	694	-0.0837222	0.0413281	0.0431832	0.482346	679	-0.0767213	0.0421624	0.0692698	0.587992	679	-0.0818452	0.0422075	0.0529196	0.596055
NEFA C17:0	734	-0.00990413	0.0217551	0.649063	0.963811	690	-0.015807	0.0232297	0.496449	0.862786	675	-0.0106589	0.0237425	0.653626	0.910719	675	-0.0153656	0.0237038	0.517064	0.912693
NEFA C17:1	735	-0.0516685	0.0293315	0.0785742	0.65688	691	-0.0507231	0.0317737	0.110878	0.589964	676	-0.0453346	0.0324811	0.163275	0.737495	676	-0.0484312	0.0325608	0.137394	0.734937
NEFA C18:0	733	-0.00232481	0.0184681	0.89986	0.976288	688	-0.0105742	0.0200648	0.598368	0.912838	673	-0.00619914	0.020616	0.763744	0.958135	673	-0.0100864	0.0205688	0.624037	0.913963
NEFA C18:1	736	-0.0244752	0.0279846	0.382087	0.819851	691	-0.0209827	0.0307146	0.494751	0.862786	676	-0.0162737	0.0313371	0.603721	0.910719	676	-0.0189122	0.0314224	0.547471	0.912693
NEFA C18:2	736	-0.0428811	0.0287115	0.135742	0.726271	691	-0.0323556	0.0317214	0.308103	0.798814	676	-0.0267436	0.0323214	0.408299	0.910719	676	-0.031933	0.0323286	0.323637	0.912693
NEFA C18:3	735	-0.0467368	0.0361083	0.195961	0.75935	690	-0.0339887	0.0397268	0.39255	0.841136	676	-0.035166	0.0406835	0.387699	0.910719	676	-0.0399902	0.0407563	0.326859	0.912693
NEFA C20:0	580	0.0211409	0.02326	0.363792	0.819851	551	0.00569485	0.0253227	0.822151	0.960125	540	0.00688828	0.0258388	0.789894	0.961773	540	0.00545859	0.0259847	0.833696	0.956486
NEFA C20:1	736	0.0244058	0.0232404	0.294005	0.798013	691	0.0183917	0.0252637	0.466877	0.858768	676	0.0228388	0.0257413	0.375276	0.910719	676	0.0222722	0.0258341	0.388939	0.912693
NEFA C20:2	643	0.0356722	0.0274138	0.193651	0.75935	606	0.0277025	0.0298161	0.353216	0.838889	593	0.029186	0.030468	0.338509	0.910719	593	0.0229474	0.0304354	0.451181	0.912693
NEFA C20:3	694	-0.0309752	0.0239567	0.196465	0.75935	656	-0.0325592	0.0264609	0.218982	0.775716	643	-0.0331688	0.0271052	0.22153	0.776647	643	-0.0357936	0.0271716	0.188223	0.765961
NEFA C20:4	736	-0.0278357	0.0233929	0.234473	0.774563	691	-0.0306376	0.0255689	0.231252	0.790268	676	-0.0319327	0.0261773	0.222961	0.776647	676	-0.0354535	0.0262122	0.17667	0.741472
NEFA C22:0	604	0.0400123	0.0352508	0.256806	0.774563	573	0.0318071	0.0385987	0.41027	0.841136	561	0.0292098	0.0397386	0.46263	0.910719	561	0.0285776	0.0398586	0.473702	0.912693
NEFA C22:1	646	0.0528333	0.0274288	0.05453	0.569839	608	0.0590015	0.0300223	0.0498583	0.482346	596	0.0627691	0.0307722	0.0418309	0.587992	596	0.064568	0.0308256	0.0366463	0.581101
NEFA C22:2	635	0.0218735	0.0230959	0.343972	0.819851	598	0.0269738	0.0252668	0.286168	0.798814	586	0.0304614	0.0259297	0.240585	0.8243	586	0.0301642	0.0259954	0.246395	0.872822
NEFA C22:6	736	0.0388472	0.0231446	0.0936933	0.671921	691	0.0409145	0.0251414	0.104132	0.589964	676	0.0430647	0.0257589	0.0950389	0.662104	676	0.0327759	0.0253034	0.195673	0.771617
NEFA C24:1	695	0.024444	0.0178171	0.170538	0.758349	657	0.031211	0.0191915	0.104385	0.589964	644	0.0370198	0.0195704	0.0590086	0.587992	644	0.0374886	0.0196429	0.0567904	0.596055
NEFA C16:2	671	-0.0711787	0.0320138	0.026532	0.396085	629	-0.0603275	0.0351599	0.086711	0.589964	616	-0.0571608	0.0359179	0.11205	0.688775	616	-0.0619752	0.0357605	0.0836093	0.602563
NEFA C16:3	589	-0.0136982	0.0303451	0.651862	0.963811	555	-0.00846512	0.0337607	0.802113	0.952717	545	-0.00316568	0.034211	0.926309	0.984973	545	-0.00963453	0.0340527	0.777343	0.956486
NEFA C18:4	660	0.00563236	0.0403259	0.888964	0.976288	618	0.0163637	0.0446022	0.713839	0.944926	605	0.0118547	0.0457702	0.795723	0.961773	605	0.0029096	0.0456088	0.949156	0.986933
NEFA C19:1	736	-0.0304536	0.0263183	0.247607	0.774563	691	-0.0287725	0.0282954	0.309588	0.798814	676	-0.0241031	0.0289429	0.405275	0.910719	676	-0.027459	0.0289971	0.344015	0.912693
NEFA C20:5	668	0.052282	0.0364246	0.151667	0.726271	626	0.0504183	0.0400698	0.208783	0.75234	611	0.0410557	0.0408723	0.315558	0.910719	611	0.0230753	0.0403077	0.567217	0.912693
NEFA C22:3	565	0.00667946	0.0268621	0.803719	0.976288	534	0.003503	0.0272725	0.897848	0.973433	523	0.00640543	0.0279675	0.818939	0.97692	523	0.0062267	0.0280219	0.824243	0.956486
NEFA C22:4	736	-0.0275407	0.0210588	0.19136	0.75935	691	-0.0372428	0.0229643	0.105326	0.589964	676	-0.0357691	0.0234631	0.127875	0.737495	676	-0.0418273	0.023346	0.0736598	0.596055
NEFA C22:5	737	-0.0565041	0.023856	0.0181217	0.331465	692	-0.0582554	0.0259321	0.0250016	0.482346	677	-0.0535125	0.0265502	0.0442621	0.587992	677	-0.0599127	0.0264412	0.0237876	0.576999
NEFA C24:2	540	-0.0269515	0.0217108	0.215016	0.766045	505	-0.0197465	0.022705	0.384897	0.841136	494	-0.0111187	0.0232022	0.632011	0.910719	494	-0.0128221	0.0230078	0.577592	0.912693
NEFA C24:3	561	-0.0112906	0.0221962	0.611187	0.951121	530	-0.0235619	0.0244623	0.335908	0.821075	518	-0.0166471	0.0251059	0.507592	0.910719	518	-0.0172345	0.0252017	0.494383	0.912693
NEFA C24:4	737	-0.00592493	0.0209914	0.777829	0.976288	692	-0.00711864	0.022812	0.755095	0.944926	677	-1.36915e-05	0.0233388	0.999532	0.999532	677	-0.00560962	0.0232449	0.809378	0.956486
NEFA C26:0	605	0.00451227	0.0272611	0.868591	0.976288	577	0.0135517	0.030178	0.653564	0.935581	565	0.0233961	0.0309717	0.450337	0.910719	565	0.0199166	0.0310552	0.521582	0.912693
NEFA C26:3	637	0.0232543	0.0202172	0.250495	0.774563	598	0.012098	0.0220315	0.583136	0.90802	585	0.0177155	0.0223823	0.42899	0.910719	585	0.0190656	0.0225254	0.39769	0.912693
NEFA C26:4	530	-0.0155605	0.0207817	0.454344	0.855448	492	-0.027418	0.0234209	0.242325	0.790268	483	-0.0225252	0.0237076	0.342547	0.910719	483	-0.0237919	0.0235974	0.313871	0.912693
C14:0	723	-0.0124235	0.0164244	0.449653	0.855448	679	-0.0162725	0.0174308	0.350873	0.838889	664	-0.0235146	0.0177058	0.184617	0.760745	664	-0.0261417	0.0176756	0.139632	0.734937
C15:1	725	-0.0104449	0.0279342	0.708579	0.976288	681	-0.0180211	0.0291963	0.537287	0.869108	666	-0.0135737	0.0296616	0.647379	0.910719	666	-0.0154023	0.0297269	0.604545	0.913963
C16:0	733	-0.00920745	0.0109157	0.399221	0.826112	689	-0.0190003	0.0118148	0.108262	0.589964	674	-0.0167064	0.0121439	0.169377	0.737495	674	-0.0167164	0.0121804	0.170401	0.741472
C16:1 n7	732	-0.0317771	0.016018	0.0476487	0.524136	689	-0.0424739	0.0172947	0.0143024	0.373649	674	-0.0421369	0.017698	0.0175524	0.578617	674	-0.0425296	0.0177516	0.0168601	0.533781
C17:0	722	2.15712e-05	0.0175001	0.999017	0.999017	678	-0.0102588	0.0184923	0.579244	0.90802	663	-0.0105676	0.0188311	0.57487	0.910719	663	-0.0150605	0.0187198	0.421387	0.912693
C18:0	733	-0.00147371	0.0111221	0.894623	0.976288	689	-0.00940713	0.0119347	0.430843	0.841136	674	-0.00844434	0.0122362	0.490365	0.910719	674	-0.00868098	0.0122722	0.479587	0.912693
C18:1 n9	732	-0.00857898	0.01113	0.441076	0.855448	688	-0.0195102	0.0121685	0.109325	0.589964	673	-0.0174407	0.0124749	0.162563	0.737495	673	-0.0173665	0.0125141	0.165678	0.741472
C18:1 n7	734	-0.00898154	0.0131532	0.494925	0.900515	690	-0.0185087	0.0140426	0.187933	0.741096	675	-0.0164176	0.0143579	0.253261	0.840183	675	-0.0154293	0.0143894	0.283988	0.912693
C18:2 n6	733	-0.0239871	0.014688	0.102878	0.671921	689	-0.0255755	0.0161127	0.112912	0.589964	674	-0.0213947	0.01655	0.196556	0.760745	674	-0.0247016	0.0164886	0.134583	0.734937
C18:3 n6	722	-0.0378187	0.0201747	0.0612586	0.609669	678	-0.0348779	0.0217702	0.109608	0.589964	663	-0.0398289	0.0222145	0.0734488	0.590415	663	-0.0410542	0.0222758	0.0657846	0.596055
C18:3 n3	717	0.0130459	0.031459	0.678489	0.968611	674	0.0302476	0.03384	0.37173	0.841136	659	0.0298291	0.0345382	0.388098	0.910719	659	0.0202868	0.0342629	0.553995	0.912693
C20:1 n9	694	0.012048	0.0274144	0.660453	0.963811	651	-0.0082113	0.0297781	0.78283	0.944926	636	-0.0120624	0.0305413	0.693011	0.934447	636	-0.0143941	0.0306206	0.638462	0.913963
C20:2 n6	720	-0.00733641	0.0198965	0.712438	0.976288	676	-0.0156825	0.0217188	0.470504	0.858768	661	-0.0146729	0.0222559	0.509949	0.910719	661	-0.0134189	0.0223067	0.547676	0.912693
C20:3 n9	734	-0.0280568	0.0315238	0.373748	0.819851	690	-0.0506731	0.0336887	0.133005	0.678003	675	-0.0471462	0.0339669	0.165602	0.737495	675	-0.0299025	0.0325887	0.359176	0.912693
C20:3 n6	732	-0.0113962	0.015362	0.458422	0.855448	688	-0.0128968	0.0165426	0.435891	0.841136	673	-0.0130826	0.0170497	0.443164	0.910719	673	-0.00999692	0.0169551	0.555653	0.912693
C20:4 n6	732	-0.0155421	0.012558	0.216252	0.766045	688	-0.023652	0.0133549	0.0770028	0.574771	673	-0.0214716	0.0136537	0.116294	0.694444	673	-0.0221526	0.0136904	0.106115	0.693067
C20:3 n3	714	0.00420994	0.0216784	0.846075	0.976288	670	0.00935083	0.0235428	0.69136	0.943201	655	0.00880375	0.0241841	0.715955	0.945171	655	0.00802701	0.0242597	0.740844	0.956486
C20:5 n3	729	0.117757	0.0283744	3.71669e-05	0.00776789	685	0.105136	0.0308586	0.000695701	0.0727008	670	0.109468	0.0316024	0.000566866	0.0592375	670	0.103066	0.0314482	0.00110305	0.115269
C22:4 n6	716	-0.00958955	0.0169355	0.571409	0.913923	672	-0.0218811	0.0183456	0.233407	0.790268	657	-0.0189546	0.0187977	0.313665	0.910719	657	-0.0183737	0.0188542	0.330167	0.912693
C22:5 n6	734	-0.0843883	0.0221547	0.000151204	0.0158008	690	-0.0985688	0.0240868	4.78452e-05	0.00999964	675	-0.0952499	0.0244895	0.000110595	0.0231143	675	-0.0860921	0.0239902	0.000356914	0.0745951
C22:5 n3	731	0.058033	0.0283591	0.0410791	0.476974	687	0.0545375	0.029517	0.0650859	0.544118	672	0.0568453	0.0300882	0.0592905	0.587992	672	0.0524086	0.0300546	0.0816634	0.602563
C22:6 n3	734	0.0509059	0.0170867	0.00298486	0.199486	690	0.0484199	0.0180586	0.00751217	0.373649	675	0.0495286	0.0183938	0.00726691	0.379696	675	0.0467579	0.0183784	0.0111792	0.533781
AC C10:0	673	0.0497425	0.0275851	0.0718092	0.640743	635	0.0601271	0.0303004	0.0476619	0.482346	621	0.0573549	0.0310974	0.0656273	0.587992	621	0.0541743	0.0311713	0.0827365	0.602563
AC C10:1	650	-0.006238	0.0270209	0.817499	0.976288	616	0.0428487	0.0295944	0.148183	0.723917	602	0.0337158	0.0304918	0.269303	0.865913	602	0.0306404	0.0305689	0.316601	0.912693
AC C12:0	682	0.0018273	0.0287056	0.949263	0.996524	644	0.0215188	0.031053	0.488588	0.862786	631	0.0133289	0.0317774	0.675039	0.916124	631	0.0093023	0.0317257	0.769462	0.956486
AC C14:1	733	-0.0220508	0.0251158	0.380259	0.819851	691	-0.00890895	0.0274389	0.745523	0.944926	676	-0.0120214	0.0279986	0.667806	0.912232	676	-0.0155447	0.0280214	0.579261	0.912693
AC C16:0	738	0.0727363	0.0289964	0.0123446	0.272863	693	0.0642659	0.0314321	0.0412865	0.482346	678	0.0634983	0.0319344	0.0471858	0.587992	678	0.0636775	0.0320362	0.0472666	0.581101
AC C18:1	693	0.0913715	0.0315507	0.00390135	0.199486	655	0.0826907	0.0332294	0.0130858	0.373649	642	0.0770779	0.0332902	0.0209225	0.578617	642	0.0750788	0.0333789	0.0248468	0.576999
AC C2:0	735	0.0204141	0.0221384	0.356779	0.819851	690	0.027623	0.0241614	0.25334	0.790268	675	0.0236671	0.024762	0.339537	0.910719	675	0.0193242	0.0247123	0.43452	0.912693
AC C3:0	737	0.0394032	0.0250506	0.116172	0.72027	692	0.0283963	0.0269781	0.292921	0.798814	677	0.0262374	0.0273392	0.337563	0.910719	677	0.0257259	0.0274224	0.348525	0.912693
AC C8:1	736	0.0547786	0.0386249	0.15656	0.727135	692	0.0687369	0.0426375	0.107408	0.589964	677	0.0477584	0.0431431	0.268713	0.865913	677	0.0414173	0.0431216	0.337173	0.912693
H1	719	-0.0729592	0.0660666	0.269829	0.783055	674	-0.0564747	0.0712076	0.428009	0.841136	659	-0.0448543	0.073031	0.539316	0.910719	659	-0.0385601	0.0731714	0.598391	0.913963
LPCa C14:0	736	0.0130959	0.0206674	0.526509	0.900515	692	0.0109594	0.0223247	0.623651	0.925377	677	0.00727828	0.022762	0.749257	0.953698	677	0.0159761	0.0222797	0.47359	0.912693
LPCa C16:0	737	0.0141645	0.0165469	0.392273	0.819851	692	0.0143282	0.0178266	0.421824	0.841136	677	0.009666	0.0182699	0.59694	0.910719	677	0.0155658	0.0180139	0.387852	0.912693
LPCa C16:1	737	-0.00844311	0.0215607	0.695472	0.976288	692	-0.00962982	0.0228736	0.67389	0.943201	677	-0.0150442	0.0234609	0.521589	0.910719	677	-6.54115e-05	0.0219571	0.997624	0.999343
LPCa C18:0	738	0.0180111	0.0194874	0.355668	0.819851	693	0.0220976	0.0212072	0.297797	0.798814	678	0.0154442	0.0217026	0.476951	0.910719	678	0.0185847	0.0216996	0.392062	0.912693
LPCa C18:1	739	-0.00264315	0.0196485	0.893028	0.976288	694	-0.00560923	0.0207192	0.786685	0.944926	679	-0.00806256	0.0211892	0.703696	0.936768	679	0.00455078	0.02	0.820076	0.956486
LPCa C18:2	736	-0.0106353	0.0225566	0.637432	0.963811	691	0.000602731	0.0239434	0.979924	0.989883	676	-9.99125e-05	0.0245574	0.996755	0.999532	676	0.00979704	0.0239026	0.682034	0.931668
LPCa C18:3	604	-0.0334281	0.0355156	0.346976	0.819851	576	-0.0412326	0.038804	0.288434	0.798814	564	-0.0550942	0.0397637	0.16646	0.737495	564	-0.0405427	0.039218	0.301703	0.912693
LPCa C20:3	736	-0.0195085	0.0242583	0.421549	0.847151	691	-0.0158001	0.0257159	0.539154	0.869108	676	-0.0180028	0.0264413	0.496205	0.910719	676	-0.00468773	0.0252865	0.852985	0.956486
LPCa C20:4	735	-0.00548341	0.0220022	0.803261	0.976288	690	0.00191004	0.0230545	0.933997	0.984724	675	0.00132138	0.0236745	0.955507	0.994726	675	0.010231	0.023133	0.658442	0.91743
LPCa C22:6	668	0.0441237	0.024621	0.0735781	0.640743	629	0.0525674	0.0268257	0.0505016	0.482346	616	0.0460663	0.0273045	0.0921058	0.662104	616	0.0543103	0.0270814	0.0453717	0.581101
LPCe C16:0	692	-0.00775463	0.0264128	0.769159	0.976288	654	-0.0187668	0.0285522	0.511241	0.862786	641	-0.023099	0.0290145	0.426271	0.910719	641	-0.0170003	0.0288883	0.556425	0.912693
LPCe C18:0	733	-0.00585161	0.0265978	0.825932	0.976288	688	-0.0231679	0.0284676	0.416032	0.841136	673	-0.0287737	0.0286171	0.315047	0.910719	673	-0.0286959	0.0287087	0.317901	0.912693
LPCe C18:1	411	-0.00117537	0.035731	0.973775	0.996524	389	-0.00802996	0.0408379	0.844225	0.973433	383	-0.0185594	0.0412551	0.653074	0.910719	383	-0.0129679	0.041012	0.752035	0.956486
PCa C28:2	560	-0.027302	0.0367092	0.457355	0.855448	531	-0.0569117	0.0412798	0.168598	0.723917	521	-0.061729	0.0420006	0.142269	0.737495	521	-0.0644019	0.04212	0.126898	0.734937
PCa C30:0	737	-0.0148126	0.0243529	0.543216	0.900515	692	-0.0206622	0.0264895	0.43566	0.841136	677	-0.0195587	0.0271285	0.471191	0.910719	677	-0.0194427	0.0272137	0.475208	0.912693
PCa C30:2	700	-0.0156563	0.0231317	0.498741	0.900515	660	-0.0276684	0.0252392	0.273385	0.798814	645	-0.0219113	0.0257555	0.395241	0.910719	645	-0.0231424	0.0258186	0.370416	0.912693
PCa C32:0	739	-0.000616536	0.0209793	0.976563	0.996524	694	-0.00683183	0.0226203	0.762729	0.944926	679	-0.00229872	0.0232568	0.921295	0.984973	679	-0.00505037	0.0232769	0.8283	0.956486
PCa C32:1	737	-0.0457715	0.0272708	0.0937027	0.671921	692	-0.0616672	0.0292756	0.0355391	0.482346	677	-0.0623622	0.029937	0.0376314	0.587992	677	-0.0565648	0.0298391	0.0584493	0.596055
PCa C32:2	733	-0.0208941	0.0220879	0.344493	0.819851	688	-0.02413	0.0243763	0.322586	0.820557	673	-0.0244553	0.0250031	0.328397	0.910719	673	-0.0229097	0.0250641	0.361035	0.912693
PCa C32:3	727	-0.00688428	0.0225153	0.759877	0.976288	683	-0.00251141	0.0242857	0.917668	0.984724	668	-0.00216202	0.0248982	0.93083	0.984973	668	0.00177102	0.0248868	0.94329	0.985738
PCa C34:1	738	0.00255894	0.0188031	0.891787	0.976288	693	-0.00272885	0.0201952	0.892555	0.973433	678	-0.00427057	0.0207048	0.836653	0.984973	678	-0.00234147	0.0207406	0.91015	0.979629
PCa C34:2	736	-0.00726909	0.0208235	0.727131	0.976288	691	-0.00324601	0.022795	0.886807	0.973433	676	-0.00257876	0.0234595	0.912504	0.984973	676	-0.00464253	0.0235015	0.843466	0.956486
PCa C34:3	738	-0.0397471	0.0221318	0.0729253	0.640743	693	-0.041392	0.0243476	0.0895879	0.589964	678	-0.0434168	0.0249388	0.082168	0.636041	678	-0.0421546	0.0250067	0.0923272	0.622464
PCa C34:4	736	-0.0232746	0.0249353	0.350928	0.819851	692	-0.0317174	0.0274625	0.248531	0.790268	677	-0.0397999	0.0278728	0.153797	0.737495	677	-0.0377703	0.0279377	0.176864	0.741472
PCa C34:5	493	0.00101931	0.051677	0.984271	0.996524	465	0.00445665	0.0540626	0.934338	0.984724	455	-0.0144836	0.0560195	0.796108	0.961773	455	-0.0142162	0.0561247	0.800159	0.956486
PCa C36:1	736	0.000801522	0.0190125	0.966385	0.996524	691	-0.00160552	0.020503	0.937608	0.984724	676	-0.00292882	0.0209336	0.888774	0.984973	676	-0.000761927	0.0209629	0.971017	0.994817
PCa C36:2	735	0.0025505	0.0198231	0.89766	0.976288	690	0.00601977	0.0216646	0.781205	0.944926	675	0.00499867	0.0222953	0.82267	0.97692	675	0.00399287	0.0223565	0.858308	0.956486
PCa C36:3	736	-0.0093539	0.0201495	0.642627	0.963811	691	-0.00979567	0.0216697	0.651383	0.935581	676	-0.0148175	0.0222637	0.505938	0.910719	676	-0.009853	0.0221467	0.656542	0.91743
PCa C36:4	737	-0.0140984	0.0186464	0.449843	0.855448	692	-0.010882	0.0199981	0.58652	0.90802	677	-0.0108182	0.0204258	0.596546	0.910719	677	-0.0119453	0.0204799	0.559913	0.912693
PCa C36:5	738	0.0398744	0.023887	0.0954933	0.671921	693	0.0356213	0.0258788	0.169139	0.723917	678	0.0346007	0.0263904	0.190282	0.760745	678	0.0284124	0.0262362	0.279234	0.912693
PCa C36:6	673	0.00133627	0.0346454	0.969245	0.996524	629	-0.00326144	0.0379415	0.931527	0.984724	619	-0.00429218	0.0384367	0.911124	0.984973	619	-0.00651203	0.0384995	0.86574	0.956486
PCa C38:0	733	0.0616712	0.0242926	0.0113379	0.272863	689	0.068465	0.0263644	0.0096159	0.373649	674	0.0668948	0.0269426	0.0132853	0.555326	674	0.0640544	0.0269792	0.0178778	0.533781
PCa C38:2	612	0.00965486	0.0324028	0.765835	0.976288	579	0.0100181	0.0356478	0.778793	0.944926	568	0.0130332	0.0362124	0.719053	0.945171	568	0.0123685	0.0362838	0.733324	0.956486
PCa C38:3	736	0.0115956	0.0191374	0.544764	0.900515	691	0.0220742	0.0204908	0.28175	0.798814	676	0.0184432	0.0210184	0.380552	0.910719	676	0.020836	0.0210019	0.321519	0.912693
PCa C38:4	737	-0.00663847	0.0182878	0.716712	0.976288	692	-0.00108872	0.019588	0.955692	0.989883	677	-0.00261729	0.0199693	0.895764	0.984973	677	-0.0051014	0.0199816	0.798569	0.956486
PCa C38:5	734	-0.013478	0.0177604	0.448175	0.855448	689	-0.0101424	0.0191019	0.595623	0.912838	674	-0.0117548	0.0193822	0.544415	0.910719	674	-0.0110674	0.0194382	0.569306	0.912693
PCa C38:6	735	0.0318936	0.0206734	0.123335	0.722892	690	0.0404228	0.0222014	0.0690968	0.555432	676	0.0433376	0.0225451	0.0550095	0.587992	676	0.0403119	0.0225385	0.0741504	0.596055
PCa C40:0	572	0.0213853	0.032541	0.511337	0.900515	537	-0.00456193	0.0358929	0.898912	0.973433	527	-0.0101641	0.0365392	0.780996	0.960166	527	-0.0115844	0.0365598	0.751481	0.956486
PCa C40:4	698	-0.00449328	0.0225284	0.841971	0.976288	659	0.00414921	0.0245664	0.865931	0.973433	646	0.000467825	0.0250645	0.985114	0.999532	646	0.00140218	0.0251387	0.955537	0.988649
PCa C40:5	738	-0.0298968	0.0262745	0.255556	0.774563	693	-0.0242817	0.0287253	0.398241	0.841136	678	-0.0244198	0.0291906	0.403144	0.910719	678	-0.0194689	0.0291403	0.504299	0.912693
PCa C40:6	737	0.0517158	0.0235986	0.0287374	0.400408	692	0.0628311	0.0251723	0.0127991	0.373649	678	0.0697103	0.0255107	0.0064543	0.379696	678	0.0668081	0.0255369	0.00909947	0.533781
PCa C42:0	493	0.0228745	0.0350356	0.514137	0.900515	466	0.0148639	0.0365065	0.684088	0.943201	456	0.00867389	0.0379245	0.819198	0.97692	456	0.0060023	0.0378612	0.87411	0.956486
PCa C42:1	385	-0.00805899	0.0368294	0.82691	0.976288	365	0.0131361	0.0382242	0.731311	0.944926	357	0.0137113	0.0397452	0.730324	0.94921	357	0.0111924	0.0393994	0.776529	0.956486
PCa C42:5	385	0.0471248	0.036443	0.196771	0.75935	364	0.076051	0.0387973	0.0507732	0.482346	357	0.0735112	0.0404907	0.070334	0.587992	357	0.0737075	0.0403229	0.0684467	0.596055
PCa C43:6	689	0.00671692	0.0270865	0.804226	0.976288	652	0.0188721	0.0294912	0.522457	0.862786	640	0.0211866	0.0302154	0.483452	0.910719	640	0.0187721	0.0302695	0.535379	0.912693
PCa C44:12	690	-0.00781551	0.0271426	0.773479	0.976288	651	0.00191533	0.0295411	0.948325	0.989883	638	-0.000187765	0.0303209	0.995061	0.999532	638	-0.000243376	0.0304087	0.993617	0.999343
PCe C32:0	739	-0.00898737	0.0216271	0.677855	0.968611	694	-0.0157182	0.0236859	0.507168	0.862786	679	-0.0137534	0.0242673	0.571082	0.910719	679	-0.0119804	0.0243223	0.622484	0.913963
PCe C32:1	739	-0.00742937	0.0214608	0.729306	0.976288	694	-0.0224462	0.0234036	0.337859	0.821075	679	-0.02048	0.0239482	0.392766	0.910719	679	-0.0206433	0.0240232	0.390487	0.912693
PCe C32:2	700	0.0247273	0.0276898	0.372166	0.819851	660	0.00883894	0.0303073	0.770653	0.944926	645	0.0135118	0.0307041	0.660043	0.912232	645	0.011409	0.0307606	0.710841	0.952752
PCe C34:0	739	-0.0295399	0.0269979	0.274253	0.783055	694	-0.0373215	0.0290745	0.199708	0.746413	679	-0.0369996	0.0295069	0.210317	0.776647	679	-0.0387602	0.0295824	0.190574	0.765961
PCe C34:1	737	-0.0231574	0.0203583	0.255713	0.774563	692	-0.029593	0.0222688	0.184335	0.741096	677	-0.0294539	0.0227488	0.195869	0.760745	677	-0.0273451	0.022787	0.230564	0.8454
PCe C34:2	737	-0.022392	0.0198397	0.259423	0.774563	692	-0.0303534	0.0218163	0.164593	0.723917	677	-0.029726	0.022343	0.18384	0.760745	677	-0.0303121	0.0224107	0.176663	0.741472
PCe C34:3	737	-0.0503646	0.02426	0.038246	0.470201	692	-0.0480774	0.026746	0.0726996	0.562749	677	-0.0448798	0.0272683	0.100275	0.66401	677	-0.050995	0.02713	0.0606032	0.596055
PCe C34:4	623	-0.0299301	0.0452445	0.50853	0.900515	585	-0.0154187	0.0497365	0.756671	0.944926	572	-0.0318589	0.0511386	0.53355	0.910719	572	-0.0320591	0.0512282	0.531701	0.912693
PCe C36:0	590	0.00369239	0.0298352	0.901549	0.976288	554	-0.0216387	0.0330162	0.512495	0.862786	543	-0.0161255	0.0338202	0.633703	0.910719	543	-0.0161677	0.0339507	0.634125	0.913963
PCe C36:1	737	-0.0130724	0.0230326	0.570512	0.913923	692	-0.0198125	0.025029	0.428885	0.841136	677	-0.0175911	0.0255142	0.490779	0.910719	677	-0.0194292	0.0255728	0.447675	0.912693
PCe C36:2	736	-0.0111195	0.022059	0.61436	0.951121	691	-0.015654	0.0240914	0.516061	0.862786	676	-0.0149077	0.0244295	0.54192	0.910719	676	-0.0177224	0.0244539	0.468882	0.912693
PCe C36:3	735	-0.0126721	0.0211805	0.549835	0.900515	690	-0.00581208	0.0232031	0.802288	0.952717	675	-0.00773623	0.0237897	0.745141	0.953698	675	-0.0043535	0.023781	0.854803	0.956486
PCe C36:4	737	-0.0114944	0.019293	0.551512	0.900515	692	-0.012432	0.0210754	0.555469	0.886207	677	-0.01356	0.0214757	0.527993	0.910719	677	-0.011921	0.0215228	0.579853	0.912693
PCe C36:5	737	-0.00459774	0.0208097	0.8252	0.976288	692	-0.00890256	0.0225356	0.692937	0.943201	677	-0.0104085	0.023087	0.652256	0.910719	677	-0.0131436	0.0231068	0.569676	0.912693
PCe C36:6	412	0.113296	0.0845569	0.181046	0.75935	388	0.101351	0.0984372	0.303873	0.798814	383	0.0868945	0.100176	0.386289	0.910719	383	0.0870609	0.100344	0.386178	0.912693
PCe C38:0	734	0.000955045	0.0266546	0.971428	0.996524	689	0.00497826	0.0287542	0.862601	0.973433	674	0.00246243	0.0293368	0.933133	0.984973	674	-0.00616596	0.029013	0.831765	0.956486
PCe C38:2	726	-0.0576555	0.0367545	0.117173	0.72027	681	-0.074201	0.0391804	0.0586876	0.533291	666	-0.081043	0.0399658	0.0429945	0.587992	666	-0.0834651	0.0400742	0.0376705	0.581101
PCe C38:3	730	-0.024006	0.0275186	0.383308	0.819851	685	-0.0221127	0.0297439	0.457482	0.858356	670	-0.0257608	0.0304259	0.397492	0.910719	670	-0.0303003	0.0304225	0.319634	0.912693
PCe C38:4	736	-0.0232094	0.0182334	0.203462	0.75935	691	-0.0216539	0.019909	0.277146	0.798814	676	-0.0218696	0.0201522	0.278226	0.881049	676	-0.0231421	0.0202024	0.252419	0.879258
PCe C38:5	736	-0.00143184	0.019218	0.940629	0.996524	691	-0.000368888	0.0210022	0.985992	0.989883	676	-0.0028223	0.021433	0.895278	0.984973	676	-0.00232244	0.0214988	0.914008	0.979629
PCe C38:6	737	0.00430009	0.0207111	0.835583	0.976288	692	0.0146268	0.0226168	0.518035	0.862786	677	0.0112982	0.0230412	0.624053	0.910719	677	0.00854938	0.02306	0.710948	0.952752
PCe C40:0	734	0.0209702	0.0195686	0.284249	0.792108	690	0.0284648	0.0211719	0.179259	0.741096	676	0.0351565	0.0214965	0.10244	0.66401	676	0.0321288	0.0214929	0.135438	0.734937
PCe C40:1	633	0.0104305	0.0324144	0.747723	0.976288	595	-0.0140332	0.0358694	0.695773	0.943201	585	-0.0177003	0.036708	0.629858	0.910719	585	-0.016562	0.0368008	0.652853	0.91743
PCe C40:3	571	-0.0578349	0.0400214	0.148993	0.726271	534	-0.0768638	0.0439172	0.0806831	0.581475	524	-0.0724439	0.0445874	0.104844	0.66401	524	-0.0756192	0.0445899	0.0905321	0.622464
PCe C40:4	731	-0.0293281	0.0229986	0.202649	0.75935	686	-0.0286517	0.0248381	0.249105	0.790268	672	-0.0327399	0.0252537	0.195289	0.760745	672	-0.036874	0.0252182	0.144174	0.734937
PCe C40:5	732	-0.0240807	0.0256357	0.347874	0.819851	687	-0.023808	0.0274617	0.386281	0.841136	672	-0.0257178	0.0280523	0.3596	0.910719	672	-0.0299547	0.0280382	0.285761	0.912693
PCe C40:6	735	0.0323474	0.0220537	0.14288	0.726271	690	0.0435918	0.0234658	0.0636566	0.544118	675	0.0430846	0.0236552	0.069014	0.587992	675	0.0375161	0.0235041	0.110943	0.702642
PCe C42:1	406	-0.058178	0.0447152	0.193992	0.75935	382	-0.0400752	0.0472337	0.39675	0.841136	374	-0.0289822	0.0481853	0.547911	0.910719	374	-0.0329529	0.0482218	0.494828	0.912693
PCe C42:2	581	-0.0454578	0.0391865	0.246523	0.774563	547	-0.0499654	0.0434157	0.250313	0.790268	536	-0.0614442	0.0444832	0.167792	0.737495	536	-0.0644988	0.0445953	0.148703	0.739972
PCe C42:3	492	0.0281382	0.04249	0.508142	0.900515	465	0.0493826	0.0445473	0.268226	0.798814	456	0.0566829	0.0458095	0.216622	0.776647	456	0.0553477	0.0458052	0.22758	0.8454
PCe C42:4	673	0.00359376	0.0271136	0.894594	0.976288	634	0.0141067	0.0295407	0.633153	0.925377	624	0.00847837	0.0303067	0.779764	0.960166	624	0.00427965	0.030302	0.887733	0.961328
PCe C42:5	639	-0.0149926	0.0279601	0.592001	0.930288	601	-0.0116357	0.0301299	0.699503	0.943201	591	-0.0157781	0.0308993	0.60981	0.910719	591	-0.0177092	0.0309518	0.567445	0.912693
PCe C42:6	665	0.000921855	0.0294822	0.975065	0.996524	627	0.00962057	0.0299723	0.748335	0.944926	612	0.0028309	0.0307851	0.926764	0.984973	612	-0.00290731	0.0306703	0.924512	0.985738
SMa C30:1	586	-0.060433	0.0366634	0.0998359	0.671921	550	-0.0524367	0.0404877	0.195842	0.746413	539	-0.0482637	0.0415289	0.245703	0.828258	539	-0.0509026	0.0415678	0.221298	0.840933
SMa C32:1	738	-0.0195225	0.0191217	0.307615	0.813817	693	-0.0220784	0.0208359	0.289695	0.798814	678	-0.0181991	0.02133	0.393853	0.910719	678	-0.0177416	0.0213953	0.407282	0.912693
SMa C32:2	737	-0.0228581	0.0240801	0.34281	0.819851	692	-0.01108	0.0259642	0.669705	0.943201	677	-0.0103144	0.0265758	0.698059	0.93522	677	-0.00605546	0.026549	0.819651	0.956486
SMa C33:1	737	-0.0238894	0.0190986	0.2114	0.766045	692	-0.024617	0.0209546	0.240504	0.790268	677	-0.0211424	0.021299	0.32125	0.910719	677	-0.0217031	0.0213631	0.310049	0.912693
SMa C34:0	730	-0.0201472	0.0181433	0.267179	0.783055	686	-0.0281693	0.0195208	0.149481	0.723917	671	-0.0249497	0.0200575	0.213986	0.776647	671	-0.0237889	0.0201068	0.237196	0.854724
SMa C34:1	737	-0.00344822	0.0157987	0.827288	0.976288	692	-0.0059588	0.0172606	0.730033	0.944926	677	-0.00203757	0.017722	0.908501	0.984973	677	-0.00286504	0.0177714	0.871973	0.956486
SMa C34:2	739	0.000195476	0.0189109	0.991756	0.996524	694	-0.000458421	0.0205937	0.982247	0.989883	679	0.00230947	0.0211286	0.912994	0.984973	679	0.00427582	0.0211651	0.839963	0.956486
SMa C35:1	737	-0.0187261	0.0198437	0.34565	0.819851	692	-0.0184932	0.0217554	0.3956	0.841136	677	-0.0117686	0.0221328	0.595099	0.910719	677	-0.0132746	0.0221795	0.549709	0.912693
SMa C36:0	500	-0.0156598	0.0228095	0.492693	0.900515	475	-0.0107807	0.0246717	0.662343	0.941698	467	-0.00334895	0.0250251	0.893602	0.984973	467	-0.00202819	0.0249867	0.935343	0.985738
SMa C36:1	738	-0.0136761	0.0169556	0.420171	0.847151	693	-0.0122576	0.0183275	0.503848	0.862786	678	-0.00964372	0.0188479	0.609062	0.910719	678	-0.00893471	0.0189024	0.636604	0.913963
SMa C36:2	739	-0.00602164	0.019287	0.75497	0.976288	694	-0.0010911	0.0206065	0.957788	0.989883	679	0.00197452	0.0211724	0.925726	0.984973	679	0.00372233	0.0212154	0.860778	0.956486
SMa C36:3	671	-0.00852712	0.027711	0.758396	0.976288	636	-0.00888837	0.0304842	0.770712	0.944926	623	-0.00628674	0.0312526	0.840643	0.984973	623	-0.00571658	0.0313193	0.855232	0.956486
SMa C38:1	618	-0.00491341	0.0200232	0.806241	0.976288	580	-0.0104008	0.0221128	0.638288	0.926404	570	-0.0110693	0.0224024	0.621427	0.910719	570	-0.00994599	0.0224454	0.657855	0.91743
SMa C38:2	737	-0.00566708	0.0192996	0.76912	0.976288	692	-0.00210389	0.0208812	0.919775	0.984724	677	0.000941101	0.0214683	0.965048	0.99849	677	0.00160397	0.0215324	0.940643	0.985738
SMa C38:3	724	-0.0303367	0.026432	0.25147	0.774563	681	-0.0279873	0.0286974	0.329793	0.820557	666	-0.0224084	0.0292121	0.44331	0.910719	666	-0.0228424	0.0292764	0.435543	0.912693
SMa C39:1	734	-0.0146221	0.0234137	0.532489	0.900515	689	-0.00566994	0.0252371	0.822308	0.960125	674	-0.00139139	0.025587	0.95665	0.994726	674	-0.00406935	0.02562	0.873849	0.956486
SMa C40:1	677	-0.011951	0.0192186	0.534259	0.900515	634	-0.00319772	0.0211326	0.879776	0.973433	622	0.000599836	0.0214901	0.977741	0.999532	622	0.00162138	0.021503	0.93992	0.985738
SMa C40:2	738	-0.00859881	0.0197905	0.664061	0.963811	693	-0.00406182	0.0214908	0.850148	0.973433	678	-0.00336317	0.0219569	0.878311	0.984973	678	-0.00355057	0.0220255	0.871984	0.956486
SMa C40:3	451	0.00874818	0.0317333	0.782925	0.976288	423	0.0264925	0.0358207	0.45998	0.858356	415	0.016509	0.0362813	0.649341	0.910719	415	0.0174069	0.0363784	0.632563	0.913963
SMa C40:4	728	-0.0225228	0.0198806	0.257635	0.774563	684	-0.0234444	0.0212899	0.271211	0.798814	669	-0.0231309	0.0217243	0.28739	0.896486	669	-0.0239861	0.0217845	0.271281	0.912693
SMa C40:5	664	0.0609235	0.0271846	0.0253573	0.396085	625	0.0627162	0.0295133	0.0339921	0.482346	612	0.0505205	0.030065	0.0934165	0.662104	612	0.0441276	0.0299549	0.141252	0.734937
SMa C41:1	736	-0.00170411	0.0220228	0.938343	0.996524	691	0.00340389	0.0238885	0.886736	0.973433	676	0.0121775	0.0244381	0.618442	0.910719	676	0.0102522	0.0244926	0.675659	0.929111
SMa C41:2	736	0.0106999	0.0231565	0.644174	0.963811	692	0.000407673	0.0253373	0.987168	0.989883	677	0.0021907	0.0257319	0.93218	0.984973	677	0.000577343	0.0257957	0.982151	0.999343
SMa C42:1	738	0.00546426	0.0176785	0.757343	0.976288	693	0.00281016	0.0195464	0.885727	0.973433	678	0.0127278	0.0199803	0.524338	0.910719	678	0.0118785	0.0200368	0.553499	0.912693
SMa C42:2	735	0.0252618	0.0176547	0.152899	0.726271	690	0.0247804	0.0193168	0.199996	0.746413	675	0.0286875	0.0198224	0.148318	0.737495	675	0.0282475	0.0198871	0.155974	0.740877
SMa C42:3	739	-0.0201721	0.0222745	0.365444	0.819851	694	-0.0188567	0.0243347	0.438678	0.841136	679	-0.0142105	0.024789	0.566669	0.910719	679	-0.0130253	0.0248576	0.600459	0.913963
SMa C42:4	481	0.00492728	0.0240263	0.8376	0.976288	455	0.0219677	0.0264633	0.406926	0.841136	447	0.0160958	0.0268148	0.548653	0.910719	447	0.0126965	0.0267001	0.634657	0.913963
SMa C42:5	434	0.0175021	0.039462	0.657617	0.963811	410	0.0228007	0.0448212	0.611245	0.925377	404	0.0147446	0.0452014	0.744453	0.953698	404	0.014464	0.0452872	0.749609	0.956486
SMa C42:6	727	0.0203541	0.0217165	0.348941	0.819851	683	0.0309995	0.0235001	0.187587	0.741096	669	0.0345858	0.0238362	0.147273	0.737495	669	0.0322299	0.0238682	0.177386	0.741472
SMa C43:2	689	-0.00858708	0.025238	0.733779	0.976288	650	0.00862718	0.0278133	0.756526	0.944926	637	0.0159814	0.0282714	0.572088	0.910719	637	0.01499	0.0283549	0.597237	0.913963
SMa C44:6	435	0.0550404	0.0360893	0.127976	0.722892	416	0.09462	0.0406239	0.0203498	0.472568	411	0.0769331	0.040969	0.0611475	0.587992	411	0.0732637	0.0409021	0.0740367	0.596055
SMa C21:2	470	-0.0420647	0.0557022	0.450534	0.855448	444	-0.028219	0.0566521	0.618665	0.925377	436	-0.042807	0.0582585	0.46289	0.910719	436	-0.040614	0.0583666	0.486917	0.912693
SMa C31:1	401	-0.00614997	0.04739	0.896812	0.976288	377	-0.00847039	0.054002	0.875449	0.973433	371	0.000635221	0.0557332	0.990913	0.999532	371	0.00045776	0.0558406	0.993464	0.999343
SMa C35:2	644	-0.0132199	0.027602	0.632143	0.963811	601	0.00610407	0.0306567	0.842247	0.973433	588	0.00371379	0.0314743	0.906114	0.984973	588	0.0044703	0.0315769	0.887472	0.961328
SMa C37:2	436	0.0121612	0.032476	0.708244	0.976288	416	0.0323913	0.0367279	0.378349	0.841136	410	0.0279676	0.0373628	0.454584	0.910719	410	0.0290977	0.0374432	0.437562	0.912693
SMa C37:3	708	-0.0518746	0.033738	0.124611	0.722892	665	-0.0471519	0.0370753	0.203911	0.747672	651	-0.0539743	0.0379128	0.155049	0.737495	651	-0.0543021	0.0380179	0.153698	0.740877
SMa C39:4	516	-0.0388009	0.0321311	0.227776	0.774563	485	-0.0284647	0.0358485	0.427583	0.841136	478	-0.0317719	0.0364341	0.383648	0.910719	478	-0.0336151	0.0364491	0.356888	0.912693
SMa C39:5	684	-0.00338805	0.0268502	0.899625	0.976288	646	0.00101282	0.0294825	0.972606	0.989883	633	-0.00398837	0.0302294	0.895078	0.984973	633	-0.00494331	0.0303231	0.870556	0.956486
SMa C41:5	558	0.0334746	0.032774	0.307531	0.813817	526	0.0277872	0.0368815	0.45155	0.857945	519	0.0254078	0.0371077	0.49385	0.910719	519	0.0257008	0.0371659	0.489566	0.912693
SMa C43:0	350	0.0174224	0.0319548	0.585959	0.927768	331	0.0332245	0.0374538	0.375714	0.841136	326	0.0208545	0.0390778	0.593958	0.910719	326	0.0162301	0.0387616	0.675717	0.929111

## Sheet: Factor10
	Crude model					Main model					Main model +					Main model ++
	Not Adjusted					Adjusted for city, sex, gestational age, smoking, materanl education, maternal age					Main model, further adjusted for maternal BMI, and maternal gestational weight gain					Main model +, further adjusted for birth weight
Metabolite	n	beta	se	p	p_fdr	n	beta	se	p	p_fdr	n	beta	se	p	p_fdr	n	beta	se	p	p_fdr
Ala	736	0.044904	0.0186356	0.0162218	0.314495	691	0.0418011	0.01887	0.0270828	0.259366	676	0.0437624	0.0189678	0.0213577	0.242943	676	0.0434599	0.0189102	0.0218664	0.246453
Arg	737	0.016704	0.035609	0.639144	0.857833	692	0.016326	0.0356923	0.647525	0.92352	677	0.0155734	0.0361754	0.666977	0.937451	677	0.0159786	0.0360982	0.658173	0.947707
Asn	736	0.0380735	0.0201436	0.0591463	0.457947	691	0.0441411	0.0199548	0.0273016	0.259366	676	0.0446283	0.0201543	0.0271526	0.24979	676	0.0445439	0.0201645	0.0275217	0.261017
Asp	734	0.0689042	0.0311841	0.0274489	0.382455	689	0.0847872	0.0303787	0.00540543	0.188289	674	0.0859209	0.0307784	0.00539969	0.207805	674	0.0857947	0.0307728	0.00545946	0.206688
Cit	729	0.0374884	0.0224474	0.0953484	0.513341	684	0.0365467	0.0231411	0.114748	0.536887	670	0.0398868	0.0232508	0.0867352	0.464812	670	0.0398942	0.023259	0.0867878	0.465093
Gln	715	-0.0399039	0.0292514	0.172954	0.573768	674	-0.0361625	0.0297834	0.22512	0.672145	660	-0.0317877	0.0295849	0.283027	0.758367	660	-0.0318132	0.0296097	0.283045	0.748815
Glu	671	0.049537	0.0205234	0.0160659	0.314495	629	0.0591926	0.021067	0.0051187	0.188289	616	0.0568327	0.0210872	0.00723666	0.207805	616	0.0568044	0.0211083	0.00732396	0.206688
Gly	738	0.034628	0.0179899	0.0546407	0.457947	693	0.0413305	0.0180283	0.0221852	0.253098	678	0.0434169	0.0181755	0.0171894	0.242943	678	0.0434251	0.0181898	0.0172559	0.246453
His	737	0.0372973	0.0168403	0.0270889	0.382455	692	0.0399322	0.0171789	0.0203986	0.253098	677	0.042457	0.0171911	0.0137781	0.239969	677	0.0429465	0.0170441	0.0119837	0.225824
Ile	735	0.0364936	0.0151921	0.0165524	0.314495	690	0.0372588	0.0158095	0.018725	0.253098	675	0.0371267	0.0159241	0.020034	0.242943	675	0.0372498	0.0159127	0.0195408	0.246453
Leu	736	0.0333521	0.0150813	0.0273165	0.382455	691	0.0337491	0.0154356	0.0291299	0.264702	676	0.0343139	0.0155722	0.027908	0.24979	676	0.0343205	0.0155844	0.0280004	0.261017
Lys	610	0.0074901	0.0161363	0.64269	0.857833	573	0.010912	0.0163268	0.50419	0.85256	560	0.0117359	0.0164557	0.476045	0.814892	560	0.0116955	0.0164739	0.478049	0.815429
Met	736	0.0342778	0.0178105	0.0546758	0.457947	691	0.0375104	0.017763	0.0350822	0.297142	676	0.0393385	0.0178948	0.0282788	0.24979	676	0.0392403	0.0179004	0.0287243	0.261017
Orn	736	0.0246537	0.0233879	0.292182	0.720861	691	0.0322865	0.0223306	0.148693	0.647433	676	0.0338277	0.0225501	0.134071	0.583766	676	0.0337655	0.0225661	0.135063	0.588088
Phe	738	0.0353383	0.0143134	0.0137845	0.314495	693	0.0370726	0.0143073	0.00977418	0.226978	678	0.0391063	0.0144461	0.00696641	0.207805	678	0.039018	0.0144478	0.00710137	0.206688
Pro	737	0.032989	0.0157053	0.0360327	0.457947	692	0.0405909	0.0160606	0.0117221	0.244993	677	0.0419905	0.0162109	0.0098054	0.209041	677	0.0419753	0.0162236	0.00988938	0.206688
Trp	733	0.0136643	0.0139989	0.329348	0.720861	688	0.0150233	0.0145383	0.301812	0.759984	673	0.0125759	0.0146959	0.392457	0.814892	673	0.012587	0.0147014	0.392217	0.815429
Ser	736	0.0570088	0.0198338	0.00416867	0.290417	691	0.0681694	0.0196067	0.000540348	0.0564664	676	0.0685434	0.0198805	0.000601753	0.0628832	676	0.0685079	0.0198948	0.000611204	0.0638709
Thr	736	0.0159673	0.0175179	0.362343	0.754528	691	0.0255612	0.0181268	0.158966	0.649432	676	0.027777	0.0180242	0.12378	0.562394	676	0.0279506	0.018015	0.121266	0.576015
Tyr	735	0.0276862	0.0144597	0.0559274	0.457947	690	0.0329848	0.0146029	0.0242199	0.253098	675	0.0334958	0.0146677	0.0227149	0.242943	675	0.0335096	0.0146791	0.0227654	0.246453
Val	734	0.0313622	0.0125586	0.0127387	0.314495	689	0.0312276	0.0129351	0.0160402	0.253098	674	0.0299844	0.0130698	0.0220999	0.242943	674	0.0299496	0.0130786	0.0223449	0.246453
NEFA C12:0	736	0.031645	0.0438404	0.470638	0.796833	691	0.029899	0.0453467	0.509904	0.85256	676	0.0327777	0.0452041	0.468649	0.814892	676	0.0321748	0.0451863	0.476691	0.815429
NEFA C14:0	736	0.0376185	0.0388548	0.33328	0.720861	691	0.0424635	0.040129	0.29036	0.759984	676	0.0448572	0.0406049	0.26969	0.751482	676	0.0444928	0.0406081	0.273635	0.748815
NEFA C14:1	738	0.0285521	0.0458076	0.533282	0.825599	693	0.0338423	0.0472076	0.473697	0.839005	678	0.0337238	0.0478406	0.481113	0.814892	678	0.0330966	0.0478117	0.489042	0.815429
NEFA C15:0	734	0.0544621	0.0334352	0.103778	0.516419	690	0.0585706	0.0340031	0.0854434	0.483003	675	0.0603832	0.0343444	0.0791914	0.435552	675	0.0600062	0.0343352	0.0809984	0.456765
NEFA C15:1	637	0.0185413	0.0433411	0.668945	0.857833	599	0.0182611	0.0440429	0.678575	0.943208	587	0.0230884	0.044468	0.603817	0.914477	587	0.0221268	0.0444635	0.618933	0.918453
NEFA C16:0	736	0.0459857	0.0227018	0.0431718	0.457947	691	0.0536889	0.0233669	0.0218912	0.253098	676	0.0551685	0.0236873	0.020164	0.242943	676	0.0546273	0.0235934	0.020905	0.246453
NEFA C16:1	739	0.0413626	0.0394751	0.295076	0.720861	694	0.0499788	0.0407669	0.220643	0.672145	679	0.0508141	0.0411931	0.217813	0.705859	679	0.0502749	0.0411493	0.222238	0.693249
NEFA C17:0	734	0.0403428	0.0225829	0.0744535	0.466592	690	0.0432864	0.0227686	0.0577163	0.389119	675	0.0428266	0.0230488	0.063611	0.40287	675	0.0423245	0.0229505	0.0656174	0.425543
NEFA C17:1	735	0.0313188	0.0305479	0.305599	0.720861	691	0.0385351	0.0312333	0.21772	0.672145	676	0.0391477	0.0316121	0.216024	0.705859	676	0.0388191	0.0316066	0.21982	0.693249
NEFA C18:0	733	0.0280933	0.0194816	0.149729	0.53703	688	0.0342231	0.0200018	0.0875502	0.483003	673	0.0358121	0.0203546	0.0789818	0.435552	673	0.035175	0.0202625	0.0830482	0.456765
NEFA C18:1	736	0.0429729	0.0290854	0.139988	0.53703	691	0.0523026	0.0301114	0.0828552	0.483003	676	0.0552057	0.0304181	0.0700024	0.430309	676	0.0549123	0.030417	0.0714904	0.439456
NEFA C18:2	736	0.055557	0.0298447	0.0630776	0.463712	691	0.0645387	0.0310817	0.0382383	0.297142	676	0.0675205	0.0313513	0.0316339	0.254288	676	0.0669365	0.0312773	0.0327202	0.264612
NEFA C18:3	735	0.0196503	0.0376222	0.60162	0.857833	690	0.0254186	0.0390525	0.515347	0.854822	676	0.0287054	0.0395892	0.468664	0.814892	676	0.0281666	0.0395544	0.476661	0.815429
NEFA C20:0	580	-0.0258795	0.0244093	0.289493	0.720861	551	-0.0209443	0.0247382	0.397579	0.815129	540	-0.0172252	0.0250885	0.492656	0.814892	540	-0.0174323	0.0251069	0.487792	0.815429
NEFA C20:1	736	0.0424835	0.0241449	0.0789154	0.466592	691	0.0513413	0.0247449	0.0383868	0.297142	676	0.0541525	0.0249694	0.0304642	0.254288	676	0.0540752	0.0249875	0.0308229	0.264612
NEFA C20:2	643	0.0713901	0.029339	0.0152411	0.314495	606	0.0856048	0.0298639	0.00430021	0.188289	593	0.0907855	0.0301818	0.0027466	0.191346	593	0.0908543	0.0300339	0.00259849	0.181028
NEFA C20:3	694	0.0522503	0.0252401	0.0388196	0.457947	656	0.0525584	0.0262076	0.0453398	0.315867	643	0.0542293	0.0265898	0.0418289	0.301457	643	0.0538857	0.0265848	0.0430998	0.310616
NEFA C20:4	736	0.0207704	0.0242786	0.392559	0.773819	691	0.0141469	0.025068	0.572711	0.895917	676	0.0146425	0.0254242	0.564863	0.881018	676	0.0144781	0.0253905	0.568728	0.882874
NEFA C22:0	604	0.0303528	0.0381474	0.426543	0.773819	573	0.0169124	0.0388206	0.663258	0.936628	561	0.0172345	0.0394052	0.662022	0.937451	561	0.0167639	0.0394774	0.671266	0.948623
NEFA C22:1	646	0.0551461	0.0291713	0.0591606	0.457947	608	0.0598288	0.0297976	0.0451204	0.315867	596	0.0627062	0.030123	0.0378182	0.284826	596	0.0640199	0.0301553	0.0341843	0.264612
NEFA C22:2	635	0.0736224	0.024384	0.00263803	0.290417	598	0.086306	0.0248037	0.000540266	0.0564664	586	0.0910242	0.0250863	0.000311178	0.0628832	586	0.0909025	0.0251312	0.000324824	0.0638709
NEFA C22:6	736	0.0423995	0.0240375	0.0781767	0.466592	691	0.0416386	0.0246584	0.0917617	0.483003	676	0.0418417	0.0250286	0.095056	0.496668	676	0.041023	0.0244938	0.0944498	0.4935
NEFA C24:1	695	0.0319678	0.0188131	0.0897347	0.50688	657	0.0439219	0.0190257	0.0212904	0.253098	644	0.0463173	0.0192165	0.0162313	0.242943	644	0.0463766	0.0192337	0.0161911	0.246453
NEFA C16:2	671	0.0532082	0.0337129	0.114987	0.53703	629	0.0613747	0.0347668	0.0780141	0.483003	616	0.0655752	0.0351113	0.0623091	0.40287	616	0.0640689	0.034938	0.0671909	0.425543
NEFA C16:3	589	0.0472699	0.0315485	0.134599	0.53703	555	0.0459546	0.0326712	0.160136	0.649432	545	0.0449289	0.0331043	0.175308	0.670417	545	0.0423181	0.0328995	0.198917	0.682299
NEFA C18:4	660	0.0309104	0.0423797	0.466043	0.796833	618	0.0557091	0.0439327	0.205275	0.661461	605	0.0649033	0.0445982	0.146132	0.610834	605	0.0639911	0.044333	0.149445	0.624682
NEFA C19:1	736	0.0321385	0.0273798	0.240864	0.720861	691	0.0377181	0.0277758	0.174941	0.649432	676	0.0390853	0.0281328	0.165214	0.651506	676	0.0387119	0.0281104	0.168946	0.655624
NEFA C20:5	668	0.0442173	0.038409	0.250063	0.720861	626	0.0414114	0.0397497	0.29792	0.759984	611	0.0433533	0.0401271	0.280408	0.758367	611	0.044587	0.039374	0.257931	0.748746
NEFA C22:3	565	0.0496775	0.0278808	0.0753373	0.466592	534	0.0699106	0.0280931	0.0131446	0.249747	523	0.0757393	0.0284225	0.00795425	0.207805	523	0.075726	0.0284506	0.00802734	0.206688
NEFA C22:4	736	0.0162161	0.0218639	0.45852	0.796833	691	0.0180263	0.0225225	0.423784	0.815129	676	0.0207362	0.0227911	0.363246	0.814892	676	0.0202133	0.0226268	0.37201	0.809898
NEFA C22:5	737	0.0276207	0.0248269	0.266282	0.720861	692	0.0249686	0.0254842	0.327557	0.776603	677	0.0252624	0.0258314	0.328452	0.77268	677	0.0247632	0.0256733	0.33513	0.796445
NEFA C24:2	540	0.0405753	0.0218888	0.0643428	0.463712	505	0.0517519	0.0227669	0.0234572	0.253098	494	0.050476	0.0230006	0.028684	0.24979	494	0.0487348	0.0228164	0.0331999	0.264612
NEFA C24:3	561	0.0355526	0.0233641	0.128669	0.53703	530	0.049757	0.0237774	0.0368784	0.297142	518	0.0501172	0.0241096	0.0381585	0.284826	518	0.0501724	0.0241331	0.0381347	0.284649
NEFA C24:4	737	0.0311231	0.0217499	0.152879	0.53703	692	0.0406616	0.0222956	0.0686377	0.44829	677	0.0401808	0.0225978	0.0758588	0.435552	677	0.0397227	0.0224438	0.0772189	0.448299
NEFA C26:0	605	0.0456727	0.0296448	0.123934	0.53703	577	0.0522375	0.0305944	0.0883036	0.483003	565	0.0440573	0.031111	0.157312	0.641025	565	0.0442354	0.0310823	0.155265	0.636282
NEFA C26:3	637	0.0526988	0.0207599	0.0113766	0.314495	598	0.0639857	0.0211591	0.00260582	0.181539	585	0.060962	0.0213303	0.004422	0.207805	585	0.060947	0.0213452	0.00445945	0.206688
NEFA C26:4	530	0.0243077	0.0213107	0.254552	0.720861	492	0.0375135	0.0221594	0.0911377	0.483003	483	0.0348449	0.0222468	0.117969	0.560355	483	0.0337121	0.0221491	0.128684	0.578992
C14:0	723	0.00638282	0.0162306	0.694244	0.868845	679	0.00351166	0.016338	0.829881	0.98721	664	0.00704909	0.0164452	0.668326	0.937451	664	0.00652653	0.0163929	0.690664	0.948623
C15:1	725	0.0314298	0.0275666	0.254604	0.720861	681	0.027287	0.0273262	0.318364	0.776603	666	0.0239883	0.0274999	0.383362	0.814892	666	0.023675	0.027506	0.389706	0.815429
C16:0	733	0.00265587	0.0108206	0.80618	0.945012	689	-9.75779e-05	0.0111246	0.993004	0.994251	674	-0.00029073	0.0113206	0.979519	0.993928	674	-0.000280978	0.0113298	0.980222	0.989693
C16:1 n7	732	-0.0101412	0.0159179	0.524261	0.821507	689	-0.00752497	0.0163145	0.644771	0.92352	674	-0.00592149	0.016532	0.72032	0.958898	674	-0.00594798	0.016545	0.719333	0.957584
C17:0	722	0.0394996	0.0171772	0.0217598	0.378982	678	0.0349481	0.0172209	0.0428129	0.315867	663	0.0329889	0.0173713	0.0579993	0.391027	663	0.0321784	0.0172345	0.0623383	0.420281
C18:0	733	0.0182873	0.0109996	0.0968344	0.513341	689	0.0148635	0.0112068	0.185189	0.649432	674	0.0145817	0.0113804	0.200538	0.698539	674	0.0145537	0.0113893	0.201754	0.682299
C18:1 n9	732	0.00835297	0.0110242	0.44888	0.79503	688	0.00761766	0.0114522	0.506167	0.85256	673	0.00734169	0.0116247	0.527894	0.842212	673	0.00736937	0.0116341	0.526674	0.8339
C18:1 n7	734	-0.0026206	0.0130314	0.840677	0.954899	690	-0.00214972	0.0132066	0.870743	0.98721	675	-0.00125668	0.0133714	0.925151	0.993928	675	-0.00110321	0.01337	0.934263	0.989693
C18:2 n6	733	0.0150621	0.0145695	0.301567	0.720861	689	0.0197587	0.0151517	0.192655	0.649432	674	0.0205721	0.0154048	0.182193	0.670417	674	0.020093	0.0153214	0.190165	0.682299
C18:3 n6	722	0.0157746	0.0198508	0.427072	0.773819	678	0.0182791	0.0202949	0.368086	0.80979	663	0.0175862	0.0205203	0.391753	0.814892	663	0.0174431	0.0205307	0.395852	0.815429
C18:3 n3	717	0.0354609	0.0309752	0.252669	0.720861	674	0.0413545	0.0316023	0.191126	0.649432	659	0.0449822	0.0319383	0.159489	0.641025	659	0.0436884	0.0315949	0.167213	0.655624
C20:1 n9	694	0.0785949	0.0268132	0.00348784	0.290417	651	0.0731887	0.0275852	0.00817093	0.221752	636	0.0701509	0.0280229	0.0125567	0.238577	636	0.069835	0.0280252	0.0129659	0.225824
C20:2 n6	720	0.0535358	0.0195468	0.00631823	0.314495	676	0.0534555	0.0202494	0.00848812	0.221752	661	0.0530878	0.02055	0.010002	0.209041	661	0.0533125	0.0205531	0.00970368	0.206688
C20:3 n9	734	-0.0126929	0.0310847	0.68315	0.865323	690	-0.0036268	0.0315336	0.908468	0.98721	675	-0.00511304	0.0314817	0.87103	0.993928	675	-0.00327899	0.0301123	0.913321	0.989693
C20:3 n6	732	0.0216337	0.0151663	0.154171	0.53703	688	0.0177624	0.0154895	0.251893	0.741488	673	0.0178817	0.0158074	0.258372	0.751241	673	0.0185667	0.0156921	0.237159	0.728915
C20:4 n6	732	-0.00323918	0.0124643	0.795032	0.942069	688	-0.00509395	0.0125931	0.685969	0.943208	673	-0.00503543	0.0127414	0.69282	0.950164	673	-0.00510635	0.0127478	0.688868	0.948623
C20:3 n3	714	0.0304375	0.0212973	0.153394	0.53703	670	0.0290646	0.0219097	0.185112	0.649432	655	0.0256004	0.0222927	0.251241	0.751241	655	0.0255234	0.0223068	0.252967	0.748746
C20:5 n3	729	0.0119533	0.0283237	0.673132	0.857833	685	-0.00549473	0.0291011	0.850295	0.98721	670	-0.00974655	0.0295256	0.741426	0.968487	670	-0.010975	0.0292962	0.708063	0.948623
C22:4 n6	716	0.00774723	0.0166501	0.641861	0.857833	672	0.00343429	0.0171112	0.840991	0.98721	657	0.00319405	0.0173585	0.854067	0.993928	657	0.00328645	0.0173693	0.849988	0.985006
C22:5 n6	734	-0.00454647	0.0220515	0.836712	0.954899	690	-0.00134817	0.0227838	0.952832	0.98721	675	-0.000385392	0.022922	0.986591	0.993928	675	0.000622446	0.0223674	0.977808	0.989693
C22:5 n3	731	0.00143247	0.0280961	0.959352	0.990026	687	-0.0196038	0.0277038	0.479423	0.842011	672	-0.021522	0.027969	0.441874	0.814892	672	-0.022358	0.0278697	0.422707	0.815429
C22:6 n3	734	0.000894532	0.0170257	0.958113	0.990026	690	-0.00957317	0.0170476	0.574604	0.895917	675	-0.0110547	0.0172012	0.520659	0.838447	675	-0.0114888	0.017139	0.502879	0.821107
AC C10:0	673	0.00364089	0.0289889	0.90009	0.990026	635	0.000276362	0.0299373	0.992638	0.994251	621	0.00634981	0.0303487	0.834341	0.993928	621	0.00636853	0.0303202	0.833706	0.985006
AC C10:1	650	-0.0385799	0.0286193	0.178127	0.581695	616	-0.0415784	0.0293887	0.157659	0.649432	602	-0.0367441	0.0298945	0.219526	0.705859	602	-0.0370054	0.0298721	0.215926	0.693249
AC C12:0	682	-0.00734199	0.0304215	0.809364	0.945012	644	0.010317	0.0309321	0.73884	0.969766	631	0.0140165	0.0312737	0.654178	0.93646	631	0.0143873	0.0311699	0.64455	0.942034
AC C14:1	733	-0.00774306	0.0264191	0.769542	0.924335	691	-0.00291085	0.0272684	0.915021	0.98721	676	-0.000504358	0.0275214	0.985384	0.993928	676	-0.000743558	0.0274783	0.97842	0.989693
AC C16:0	738	0.0233437	0.0303611	0.442222	0.789953	693	0.0282231	0.0310729	0.364054	0.80979	678	0.0304906	0.0312151	0.329036	0.77268	678	0.0304802	0.0312397	0.329582	0.796445
AC C18:1	693	0.0225357	0.0336415	0.503165	0.815205	655	0.0378478	0.0332902	0.256009	0.743138	642	0.0377695	0.0329454	0.252063	0.751241	642	0.0373085	0.0329487	0.257941	0.748746
AC C2:0	735	0.0182677	0.0231086	0.429488	0.773819	690	0.0233803	0.0238498	0.327288	0.776603	675	0.0222715	0.0241707	0.357172	0.811402	675	0.0219356	0.0240612	0.362289	0.797035
AC C3:0	737	-0.003652	0.0261632	0.889027	0.984897	692	0.000191859	0.0266192	0.994251	0.994251	677	-0.00376134	0.0266724	0.887898	0.993928	677	-0.00381424	0.026691	0.886411	0.989693
AC C8:1	736	-0.024916	0.0403811	0.537416	0.825881	692	-0.022408	0.0421477	0.595142	0.905557	677	-0.00696666	0.0421406	0.868744	0.993928	677	-0.00753299	0.0420129	0.857757	0.985006
H1	719	-0.098107	0.0692552	0.157044	0.538068	674	-0.11553	0.0704085	0.101313	0.504153	659	-0.117389	0.0714156	0.100728	0.513465	659	-0.116392	0.0713846	0.103498	0.527587
LPCa C14:0	736	0.0213472	0.0215735	0.322748	0.720861	692	0.0211561	0.0220233	0.337089	0.782795	677	0.0227492	0.0222031	0.305936	0.770369	677	0.0233522	0.0216872	0.28198	0.748815
LPCa C16:0	737	0.0157492	0.0172751	0.362248	0.754528	692	0.014549	0.0175915	0.408507	0.815129	677	0.0136402	0.0178274	0.444476	0.814892	677	0.0143448	0.0175419	0.413802	0.815429
LPCa C16:1	737	-0.00515117	0.0225632	0.819478	0.949291	692	0.00360255	0.0226329	0.873581	0.98721	677	0.0030836	0.0229608	0.893208	0.993928	677	0.00514935	0.0214308	0.81019	0.985006
LPCa C18:0	738	0.0213943	0.0203207	0.29277	0.720861	693	0.0139392	0.0209225	0.505494	0.85256	678	0.0132055	0.0211671	0.53293	0.843806	678	0.0134841	0.0211168	0.523341	0.8339
LPCa C18:1	739	0.020988	0.0204764	0.305715	0.720861	694	0.0258523	0.0204098	0.205717	0.661461	679	0.0227494	0.020649	0.270991	0.751482	679	0.0237975	0.0194387	0.221308	0.693249
LPCa C18:2	736	0.0116564	0.023598	0.621487	0.857833	691	0.0186374	0.0236738	0.431412	0.815129	676	0.0165116	0.0240177	0.492029	0.814892	676	0.0183759	0.0233293	0.431175	0.815429
LPCa C18:3	604	0.0311835	0.0386315	0.419874	0.773819	576	0.0315712	0.0393048	0.422181	0.815129	564	0.0337001	0.0397709	0.397172	0.814892	564	0.0362169	0.0390578	0.354205	0.797035
LPCa C20:3	736	0.0116222	0.0253864	0.647227	0.857833	691	0.0191524	0.0254345	0.45171	0.815129	676	0.0165921	0.0258706	0.521522	0.838447	676	0.0191139	0.0246779	0.438897	0.815429
LPCa C20:4	735	-0.0193155	0.0230707	0.402742	0.773819	690	-0.0135772	0.0228585	0.552736	0.888629	675	-0.0166562	0.0232104	0.473253	0.814892	675	-0.0146053	0.0226387	0.519061	0.8339
LPCa C22:6	668	0.0277584	0.0259363	0.284903	0.720861	629	0.0248455	0.0266803	0.352107	0.799894	616	0.021214	0.0268939	0.430543	0.814892	616	0.0204634	0.0266174	0.44232	0.815429
LPCe C16:0	692	0.0170382	0.0279223	0.541936	0.826748	654	0.0134628	0.0284475	0.636198	0.92352	641	0.0164877	0.028577	0.564179	0.881018	641	0.017374	0.0283786	0.540617	0.849542
LPCe C18:0	733	0.0182191	0.0277736	0.512044	0.821507	688	0.0102248	0.0281057	0.716125	0.965613	673	0.00539539	0.027955	0.847017	0.993928	673	0.00540841	0.0279766	0.84677	0.985006
LPCe C18:1	411	-0.0413125	0.0375745	0.27222	0.720861	389	-0.042425	0.0386515	0.273077	0.75771	383	-0.044361	0.0386895	0.252306	0.751241	383	-0.0394804	0.0384634	0.30537	0.77832
PCa C28:2	560	-0.00319103	0.0391982	0.935148	0.990026	531	-0.0049815	0.0407334	0.902713	0.98721	521	-0.0191259	0.0409589	0.640737	0.93646	521	-0.0197061	0.040982	0.630836	0.928484
PCa C30:0	737	-0.032462	0.0254681	0.202857	0.652264	692	-0.0388471	0.0261779	0.13829	0.628317	677	-0.0419854	0.0265003	0.113604	0.552166	677	-0.0419632	0.0265215	0.114084	0.567702
PCa C30:2	700	-0.0392752	0.0246701	0.111843	0.53703	660	-0.0424863	0.0253902	0.0947518	0.483003	645	-0.045739	0.0256044	0.0745273	0.435552	645	-0.0458631	0.0256156	0.0738722	0.441123
PCa C32:0	739	-0.000273601	0.0218789	0.990026	0.990026	694	-0.00302039	0.0223092	0.892346	0.98721	679	-0.00386885	0.0226821	0.864616	0.993928	679	-0.00409586	0.022649	0.856549	0.985006
PCa C32:1	737	-0.0240829	0.0285511	0.399228	0.773819	692	-0.0262616	0.029023	0.365868	0.80979	677	-0.0287538	0.029343	0.32749	0.77268	677	-0.0278985	0.0291661	0.339156	0.796445
PCa C32:2	733	0.00149778	0.0232173	0.948581	0.990026	688	0.00394399	0.0242193	0.87069	0.98721	673	0.004737	0.0245614	0.847126	0.993928	673	0.00478785	0.0245624	0.845512	0.985006
PCa C32:3	727	0.0137966	0.0235659	0.558434	0.834187	683	0.00834512	0.0240229	0.728415	0.969766	668	0.0095408	0.0243713	0.695574	0.950164	668	0.00951714	0.0242977	0.695419	0.948623
PCa C34:1	738	0.00692906	0.0196608	0.724619	0.880497	693	0.00292054	0.0199673	0.883755	0.98721	678	0.000720271	0.020243	0.971627	0.993928	678	0.000958622	0.0202303	0.962221	0.989693
PCa C34:2	736	0.0140657	0.0218164	0.519307	0.821507	691	0.0106703	0.0225685	0.636515	0.92352	676	0.0106118	0.022967	0.644204	0.93646	676	0.0103005	0.0229571	0.653808	0.947707
PCa C34:3	738	0.0112299	0.0231911	0.628367	0.857833	693	0.00149872	0.0241248	0.950483	0.98721	678	0.000881601	0.0244384	0.971234	0.993928	678	0.00106112	0.0244445	0.965389	0.989693
PCa C34:4	736	0.000754326	0.026084	0.976937	0.990026	692	0.00225086	0.0271785	0.934021	0.98721	677	0.00174722	0.0272913	0.948973	0.993928	677	0.00200743	0.0272857	0.941375	0.989693
PCa C34:5	493	0.0202743	0.0533853	0.704281	0.874772	465	0.00286428	0.0555071	0.958869	0.98721	455	0.00725159	0.0561195	0.897246	0.993928	455	0.00760707	0.0562405	0.89247	0.989693
PCa C36:1	736	0.0137564	0.0199047	0.489716	0.812307	691	0.0127123	0.0202907	0.531197	0.867345	676	0.0102469	0.0204859	0.617111	0.927886	676	0.0105143	0.0204663	0.607611	0.913602
PCa C36:2	735	0.0224322	0.0207671	0.280426	0.720861	690	0.0222907	0.0214477	0.29904	0.759984	675	0.0223618	0.0218238	0.305911	0.770369	675	0.0222065	0.0218345	0.309515	0.779381
PCa C36:3	736	0.030365	0.0210872	0.150312	0.53703	691	0.0260777	0.0214371	0.224235	0.672145	676	0.0270669	0.0217812	0.214437	0.705859	676	0.0278364	0.021612	0.198202	0.682299
PCa C36:4	737	0.00542536	0.019524	0.781184	0.932957	692	-0.0041152	0.0197901	0.835337	0.98721	677	-0.00385249	0.0199871	0.847216	0.993928	677	-0.00398311	0.0199942	0.842159	0.985006
PCa C36:5	738	0.0241505	0.0250105	0.334562	0.720861	693	0.00870128	0.0256209	0.734252	0.969766	678	0.00900523	0.0258325	0.727502	0.962329	678	0.00822936	0.0256116	0.748076	0.98332
PCa C36:6	673	0.0642664	0.0358832	0.073756	0.466592	629	0.050583	0.0369819	0.17189	0.649432	619	0.0572736	0.03703	0.122474	0.562394	619	0.0563846	0.0370439	0.128518	0.578992
PCa C38:0	733	0.0270449	0.025576	0.290672	0.720861	689	0.0207049	0.0262392	0.430345	0.815129	674	0.0194021	0.0265124	0.464548	0.814892	674	0.019085	0.0264757	0.471263	0.815429
PCa C38:2	612	0.0563287	0.0342962	0.10103	0.515006	579	0.0556432	0.035307	0.115598	0.536887	568	0.0540267	0.0355191	0.128826	0.572864	568	0.0538783	0.0355493	0.130204	0.578992
PCa C38:3	736	0.0278925	0.0199135	0.161741	0.545225	691	0.021492	0.0201541	0.286636	0.759984	676	0.0211813	0.0204301	0.300228	0.770369	676	0.0215341	0.0203851	0.291197	0.760751
PCa C38:4	737	0.0190304	0.0190841	0.31901	0.720861	692	0.0107395	0.0193312	0.578702	0.895917	677	0.0109157	0.0194913	0.57565	0.886031	677	0.0107187	0.0194584	0.581924	0.89428
PCa C38:5	734	0.00836169	0.0186198	0.653513	0.857833	689	-0.00106506	0.0189233	0.955133	0.98721	674	0.000676301	0.0189888	0.9716	0.993928	674	0.000786981	0.0189999	0.966974	0.989693
PCa C38:6	735	0.00916821	0.0215091	0.670055	0.857833	690	-0.00399473	0.0218366	0.854903	0.98721	676	-0.00392619	0.0220744	0.858887	0.993928	676	-0.00439917	0.0220131	0.841666	0.985006
PCa C40:0	572	-0.0026958	0.0347419	0.938178	0.990026	537	-0.0168229	0.0354539	0.635344	0.92352	527	-0.0167531	0.0354863	0.637061	0.93646	527	-0.0190201	0.0355436	0.592803	0.90435
PCa C40:4	698	0.0151227	0.0238558	0.526347	0.821507	659	0.00201001	0.0244996	0.934639	0.98721	646	0.00499374	0.0247065	0.839887	0.993928	646	0.0051491	0.0247224	0.835081	0.985006
PCa C40:5	738	0.00178863	0.0274555	0.948075	0.990026	693	-0.00802973	0.0283634	0.777187	0.98721	678	-0.00493593	0.0285069	0.862589	0.993928	678	-0.00436644	0.0283877	0.877804	0.989693
PCa C40:6	737	0.0176387	0.0245537	0.472762	0.796833	692	0.00201841	0.0247868	0.935124	0.98721	678	0.00204822	0.0250306	0.934808	0.993928	678	0.00178681	0.024986	0.943012	0.989693
PCa C42:0	493	0.0314731	0.036489	0.388823	0.773819	466	0.0152416	0.0376344	0.685677	0.943208	456	0.0155065	0.0382984	0.68576	0.949165	456	0.0120177	0.0382571	0.753573	0.984355
PCa C42:1	385	0.0247582	0.0390734	0.526708	0.821507	365	-0.00105977	0.0403059	0.979039	0.993296	357	-0.000270316	0.0408331	0.994722	0.994722	357	-0.00369244	0.0404836	0.927381	0.989693
PCa C42:5	385	0.0154738	0.0386233	0.68892	0.867375	364	-0.00158487	0.0405669	0.968859	0.990918	357	-0.00554213	0.0411615	0.892974	0.993928	357	-0.0106559	0.0410749	0.795466	0.985006
PCa C43:6	689	0.0417346	0.0288258	0.148133	0.53703	652	0.0293781	0.0295146	0.319937	0.776603	640	0.028605	0.0298702	0.338619	0.786349	640	0.0280479	0.0298604	0.347945	0.797035
PCa C44:12	690	-0.0132995	0.0287104	0.643349	0.857833	651	-0.0310013	0.0293194	0.290752	0.759984	638	-0.0294608	0.0297392	0.322254	0.77268	638	-0.029473	0.0297652	0.322477	0.792915
PCe C32:0	739	-0.0098361	0.0225542	0.662887	0.857833	694	-0.0137213	0.0233606	0.557152	0.888892	679	-0.0164054	0.023665	0.488411	0.814892	679	-0.0162538	0.0236619	0.492379	0.815429
PCe C32:1	739	-0.00343806	0.0223826	0.877965	0.981255	694	-0.00475953	0.0230956	0.836792	0.98721	679	-0.0062968	0.0233686	0.787664	0.990416	679	-0.0063025	0.0233869	0.787639	0.985006
PCe C32:2	700	-0.0232914	0.0293935	0.428402	0.773819	660	-0.0263273	0.0303275	0.385667	0.815129	645	-0.0288013	0.0303799	0.343478	0.788867	645	-0.0291095	0.0303748	0.338264	0.796445
PCe C34:0	739	-0.000385408	0.028179	0.989091	0.990026	694	-0.00559297	0.0287076	0.845589	0.98721	679	-0.00575503	0.0288119	0.841743	0.993928	679	-0.00588646	0.0288211	0.838229	0.985006
PCe C34:1	737	-0.00397581	0.0213063	0.852025	0.962558	692	-0.00465278	0.0220441	0.8329	0.98721	677	-0.00612238	0.0222644	0.783415	0.990416	677	-0.00583968	0.0222469	0.793024	0.985006
PCe C34:2	737	0.0173714	0.0207746	0.403329	0.773819	692	0.0164203	0.0216073	0.447559	0.815129	677	0.0157148	0.0218801	0.472878	0.814892	677	0.015662	0.0218964	0.474695	0.815429
PCe C34:3	737	0.0148938	0.025463	0.558786	0.834187	692	0.00564044	0.026526	0.831674	0.98721	677	0.00752938	0.0267315	0.778288	0.990416	677	0.00681484	0.0265512	0.797516	0.985006
PCe C34:4	623	-0.00790914	0.0491651	0.87225	0.980109	585	-0.00461036	0.0506774	0.927545	0.98721	572	0.0027433	0.0513904	0.957447	0.993928	572	0.00270393	0.0514404	0.958098	0.989693
PCe C36:0	590	0.0386777	0.0313015	0.217093	0.687461	554	0.0277261	0.0323416	0.391671	0.815129	543	0.0238983	0.0327093	0.465336	0.814892	543	0.0239119	0.0327439	0.465555	0.815429
PCe C36:1	737	0.0124473	0.0240989	0.605657	0.857833	692	0.00200052	0.024771	0.935656	0.98721	677	0.000338939	0.024965	0.989172	0.993928	677	0.000122479	0.0249662	0.996087	0.996087
PCe C36:2	736	-0.0022764	0.0231064	0.921548	0.990026	691	-0.00904596	0.0238585	0.704697	0.960974	676	-0.0088818	0.0239204	0.71053	0.951929	676	-0.00922264	0.023891	0.699601	0.948623
PCe C36:3	735	0.0406169	0.0221327	0.0668976	0.466054	690	0.0319748	0.0229296	0.163638	0.649432	675	0.0314592	0.0232477	0.176457	0.670417	675	0.0318947	0.0231846	0.169396	0.655624
PCe C36:4	737	-0.000379355	0.0201991	0.985021	0.990026	692	-0.00439335	0.020857	0.833231	0.98721	677	-0.00548387	0.0210158	0.794221	0.990416	677	-0.0052779	0.0210115	0.801746	0.985006
PCe C36:5	737	-0.00157675	0.0217823	0.942314	0.990026	692	-0.00835229	0.0222973	0.708086	0.960974	677	-0.00846798	0.022588	0.707866	0.951929	677	-0.00879398	0.0225566	0.696766	0.948623
PCe C36:6	412	-0.00362142	0.0893535	0.967692	0.990026	388	-0.02404	0.0934038	0.797032	0.98721	383	-0.0261587	0.0937776	0.780448	0.990416	383	-0.0271161	0.0946306	0.774624	0.985006
PCe C38:0	734	0.0280541	0.0278323	0.313811	0.720861	689	0.00933347	0.0283858	0.742404	0.969766	674	0.0117045	0.0286355	0.682866	0.949165	674	0.0107415	0.0282545	0.703945	0.948623
PCe C38:2	726	0.0586328	0.0385124	0.128345	0.53703	681	0.0303599	0.0388734	0.435088	0.815129	666	0.0307008	0.0392283	0.434141	0.814892	666	0.0302332	0.03925	0.441423	0.815429
PCe C38:3	730	0.0559797	0.0286356	0.0509861	0.457947	685	0.0382125	0.0292444	0.191783	0.649432	670	0.0381472	0.0295812	0.197662	0.698539	670	0.0376574	0.0295113	0.202404	0.682299
PCe C38:4	736	0.00816688	0.0191093	0.669232	0.857833	691	-0.00124827	0.0197205	0.949548	0.98721	676	-0.00158527	0.0197395	0.936016	0.993928	676	-0.00172481	0.0197446	0.930416	0.989693
PCe C38:5	736	0.00211443	0.0201198	0.916332	0.990026	691	-0.0012114	0.0207759	0.953521	0.98721	676	-0.000825678	0.0209641	0.968595	0.993928	676	-0.000762998	0.0209792	0.970999	0.989693
PCe C38:6	737	0.01186	0.0216595	0.58416	0.857833	692	0.00489013	0.0223732	0.827051	0.98721	677	0.00654055	0.0225362	0.771737	0.990416	677	0.00620369	0.0225005	0.782856	0.985006
PCe C40:0	734	0.0309474	0.0203829	0.12938	0.53703	690	0.0228716	0.0208217	0.272405	0.75771	676	0.0230878	0.0210559	0.273266	0.751482	676	0.022729	0.0209973	0.279446	0.748815
PCe C40:1	633	0.0344622	0.0342226	0.31433	0.720861	595	0.0298625	0.0354297	0.399655	0.815129	585	0.0275248	0.0358214	0.44258	0.814892	585	0.0280533	0.0358561	0.434318	0.815429
PCe C40:3	571	-0.0239577	0.0425951	0.574035	0.850874	534	-0.0478858	0.0433603	0.269952	0.75771	524	-0.052211	0.0432095	0.227495	0.7204	524	-0.0559593	0.0432386	0.196195	0.682299
PCe C40:4	731	0.0397396	0.0240034	0.0982472	0.513341	686	0.0322698	0.0245099	0.188428	0.649432	672	0.032383	0.0246219	0.188907	0.680715	672	0.03186	0.024541	0.194671	0.682299
PCe C40:5	732	0.0323212	0.0267673	0.227645	0.699673	687	0.0124785	0.0271064	0.645414	0.92352	672	0.0124675	0.0273787	0.648994	0.93646	672	0.0119416	0.0273071	0.662035	0.947707
PCe C40:6	735	0.0402587	0.0229916	0.0803699	0.466592	690	0.0252561	0.0231429	0.275531	0.75771	675	0.0263445	0.0230565	0.253625	0.751241	675	0.0254561	0.0228461	0.265588	0.748815
PCe C42:1	406	0.023831	0.0453022	0.599153	0.857833	382	0.02252	0.0474591	0.635418	0.92352	374	0.0211367	0.0471304	0.654087	0.93646	374	0.019487	0.0471036	0.679341	0.948623
PCe C42:2	581	-0.0354585	0.042147	0.400532	0.773819	547	-0.0344673	0.0434259	0.427727	0.815129	536	-0.0389988	0.0439029	0.374798	0.814892	536	-0.0405788	0.0439444	0.356229	0.797035
PCe C42:3	492	0.0885543	0.044249	0.0459265	0.457947	465	0.073441	0.0460865	0.111747	0.536887	456	0.0753119	0.0464552	0.105707	0.526016	456	0.0724266	0.0465163	0.120197	0.576015
PCe C42:4	673	-0.0104219	0.0288603	0.71813	0.877714	634	-0.0227346	0.0295335	0.441721	0.815129	624	-0.0211653	0.0299173	0.479557	0.814892	624	-0.0225986	0.0298466	0.449253	0.815429
PCe C42:5	639	0.00657643	0.0296937	0.824795	0.949291	601	-0.0077077	0.029943	0.796952	0.98721	591	-0.00783507	0.0303112	0.796124	0.990416	591	-0.00873775	0.0303228	0.773332	0.985006
PCe C42:6	665	0.044621	0.0299692	0.137001	0.53703	627	0.0316955	0.0304183	0.297835	0.759984	612	0.0307825	0.0308535	0.318838	0.77268	612	0.0317158	0.0306709	0.301531	0.778025
SMa C30:1	586	-0.0551793	0.0384262	0.151554	0.53703	550	-0.0662489	0.0393302	0.0926891	0.483003	539	-0.0753254	0.0395185	0.057195	0.391027	539	-0.0771408	0.0395277	0.0515319	0.359005
SMa C32:1	738	-0.0215027	0.0199938	0.282526	0.720861	693	-0.0301205	0.0205851	0.143879	0.639802	678	-0.0309258	0.02083	0.138114	0.5891	678	-0.0308616	0.0208448	0.139213	0.593785
SMa C32:2	737	-0.0475933	0.0250884	0.0582255	0.457947	692	-0.0599632	0.0255216	0.0190887	0.253098	677	-0.0587719	0.0258371	0.0232481	0.242943	677	-0.0584282	0.0257485	0.023584	0.246453
SMa C33:1	737	0.0150144	0.0199825	0.452673	0.79503	692	0.00942332	0.0207296	0.649557	0.92352	677	0.0079125	0.0208298	0.70417	0.951929	677	0.00785675	0.0208451	0.706362	0.948623
SMa C34:0	730	0.00416302	0.0190028	0.826656	0.949291	686	0.000680228	0.0193402	0.971953	0.990918	671	-0.00120394	0.0196508	0.951166	0.993928	671	-0.00117875	0.0196526	0.95219	0.989693
SMa C34:1	737	-0.0110787	0.0165319	0.502984	0.815205	692	-0.0136296	0.0170712	0.424923	0.815129	677	-0.0150327	0.0173282	0.385975	0.814892	677	-0.0151329	0.0173361	0.383035	0.815429
SMa C34:2	739	-0.0104274	0.019718	0.597089	0.857833	694	-0.0151217	0.0203009	0.456608	0.815649	679	-0.015644	0.0205979	0.44783	0.814892	679	-0.0154827	0.0205857	0.452258	0.815429
SMa C35:1	737	-0.000430436	0.0207366	0.983445	0.990026	692	-0.00899597	0.0214867	0.675588	0.943208	677	-0.0105115	0.0216041	0.626739	0.935631	677	-0.0107295	0.0216051	0.619626	0.918453
SMa C36:0	500	0.0256676	0.0244453	0.294237	0.720861	475	0.019948	0.0241022	0.408307	0.815129	467	0.0196948	0.0242268	0.416689	0.814892	467	0.0228487	0.0242383	0.346361	0.797035
SMa C36:1	738	-0.0128967	0.0177101	0.46672	0.796833	693	-0.0140391	0.0181029	0.438309	0.815129	678	-0.0149281	0.0184076	0.417674	0.814892	678	-0.0148574	0.0184174	0.420133	0.815429
SMa C36:2	739	-0.000949403	0.0201154	0.962369	0.990026	694	-0.00463004	0.0203212	0.819838	0.98721	679	-0.00563781	0.0206485	0.784911	0.990416	679	-0.00549409	0.0206423	0.790203	0.985006
SMa C36:3	671	-0.00406442	0.0295515	0.890648	0.984897	636	-0.00434465	0.030492	0.886744	0.98721	623	-0.00233038	0.0308681	0.939846	0.993928	623	-0.00212771	0.030896	0.945119	0.989693
SMa C38:1	618	0.00626096	0.0207075	0.762488	0.921156	580	0.00269504	0.0214007	0.899831	0.98721	570	0.000676847	0.0216348	0.975054	0.993928	570	0.000985625	0.0216416	0.963691	0.989693
SMa C38:2	737	0.0161736	0.0201932	0.423428	0.773819	692	0.011212	0.0206557	0.587447	0.902768	677	0.0109749	0.0209988	0.601401	0.914477	677	0.0110555	0.0210125	0.598973	0.90714
SMa C38:3	724	-0.0254636	0.0276319	0.35709	0.754528	681	-0.0386577	0.0283181	0.172682	0.649432	666	-0.0354275	0.0284989	0.214279	0.705859	666	-0.0354577	0.0285202	0.214232	0.693249
SMa C39:1	734	0.0475977	0.0245061	0.0524947	0.457947	689	0.0346919	0.0249993	0.16569	0.649432	674	0.0334206	0.0250626	0.182841	0.670417	674	0.0330189	0.025039	0.187737	0.682299
SMa C40:1	677	0.00722091	0.0198294	0.71586	0.877714	634	0.00206159	0.0204459	0.919717	0.98721	622	0.00294748	0.0207066	0.886855	0.993928	622	0.00352077	0.0207072	0.865047	0.98795
SMa C40:2	738	0.0187651	0.0206856	0.364628	0.754528	693	0.0142015	0.0212417	0.504002	0.85256	678	0.0140196	0.0214598	0.513796	0.838447	678	0.0139997	0.0214769	0.51473	0.8339
SMa C40:3	451	0.0163523	0.0325564	0.615724	0.857833	423	0.0176354	0.033413	0.597928	0.905557	415	0.0187522	0.0335527	0.576556	0.886031	415	0.0190874	0.0335974	0.570278	0.882874
SMa C40:4	728	0.00784899	0.0208991	0.707351	0.874772	684	-0.00159363	0.0211485	0.939956	0.98721	669	-0.00173711	0.0213444	0.935161	0.993928	669	-0.00178164	0.0213568	0.933542	0.989693
SMa C40:5	664	-0.0307327	0.0288616	0.287349	0.720861	625	-0.0378284	0.0294985	0.200202	0.661461	612	-0.0336094	0.0297343	0.258801	0.751241	612	-0.0342685	0.0295287	0.24631	0.746071
SMa C41:1	736	0.00590813	0.0230558	0.797828	0.942069	691	-0.00295696	0.023646	0.900521	0.98721	676	-0.00483962	0.0239213	0.839734	0.993928	676	-0.00509528	0.0239159	0.831355	0.985006
SMa C41:2	736	0.00105902	0.0242291	0.965149	0.990026	692	-0.0028788	0.0250937	0.9087	0.98721	677	-0.00138763	0.0251998	0.956104	0.993928	677	-0.00160637	0.025204	0.949201	0.989693
SMa C42:1	738	0.0266959	0.0184381	0.14809	0.53703	693	0.0238535	0.0192873	0.216617	0.672145	678	0.0218651	0.0195067	0.262741	0.751482	678	0.02178	0.0195157	0.264823	0.748815
SMa C42:2	735	0.012405	0.0185092	0.502941	0.815205	690	0.0128938	0.0191364	0.500681	0.85256	675	0.0133655	0.0194277	0.491724	0.814892	675	0.0132866	0.0194412	0.494583	0.815429
SMa C42:3	739	0.0184881	0.0232327	0.426421	0.773819	694	0.0189146	0.0239984	0.430882	0.815129	679	0.0189395	0.0241715	0.433591	0.814892	679	0.0190439	0.0241804	0.431233	0.815429
SMa C42:4	481	0.0254165	0.0252907	0.315428	0.720861	455	0.0154923	0.0254819	0.543524	0.880593	447	0.0210726	0.0256568	0.41192	0.814892	447	0.017862	0.0255479	0.484838	0.815429
SMa C42:5	434	-0.00281597	0.0426223	0.947355	0.990026	410	-0.020664	0.0442528	0.640793	0.92352	404	-0.0150013	0.0443749	0.735504	0.966794	404	-0.0156534	0.0445388	0.72544	0.9596
SMa C42:6	727	0.0103696	0.0226787	0.64764	0.857833	683	-0.00273252	0.0231935	0.906251	0.98721	669	-0.0011574	0.0234288	0.960615	0.993928	669	-0.00130298	0.0234026	0.955617	0.989693
SMa C43:2	689	-0.0113375	0.0267837	0.672212	0.857833	650	-0.0176756	0.0277521	0.524418	0.863018	637	-0.0219315	0.0278774	0.431755	0.814892	637	-0.0221166	0.027895	0.428174	0.815429
SMa C44:6	435	0.0602047	0.0387748	0.121247	0.53703	416	0.0378478	0.0396964	0.340949	0.78306	411	0.0398777	0.0398543	0.317646	0.77268	411	0.0363976	0.0397774	0.360739	0.797035
SMa C21:2	470	0.0714892	0.0583289	0.220971	0.689298	444	0.0572855	0.0588264	0.330706	0.776603	436	0.0620311	0.0594295	0.297197	0.770369	436	0.065161	0.059567	0.27463	0.748815
SMa C31:1	401	-0.0306131	0.0522413	0.558219	0.834187	377	-0.0407254	0.0541408	0.452416	0.815129	371	-0.0401645	0.0546347	0.462741	0.814892	371	-0.0403127	0.0547264	0.461846	0.815429
SMa C35:2	644	-0.0231594	0.0284311	0.415621	0.773819	601	-0.0251514	0.0296174	0.396117	0.815129	588	-0.0239042	0.0300459	0.426607	0.814892	588	-0.0237644	0.0300731	0.429732	0.815429
SMa C37:2	436	0.00211025	0.035143	0.952146	0.990026	416	-0.012154	0.0360008	0.735841	0.969766	410	-0.0085355	0.0363711	0.814582	0.993928	410	-0.00716941	0.0364938	0.844356	0.985006
SMa C37:3	708	0.0252687	0.0358509	0.481154	0.80449	665	0.0211511	0.0371087	0.568894	0.895917	651	0.02561	0.0375237	0.495173	0.814892	651	0.0256111	0.0375537	0.4955	0.815429
SMa C39:4	516	0.0330598	0.0338774	0.329601	0.720861	485	0.0356243	0.0347883	0.306353	0.762236	478	0.0369675	0.0351338	0.293269	0.770369	478	0.0348462	0.0351776	0.322418	0.792915
SMa C39:5	684	0.0147054	0.0286592	0.608042	0.857833	646	0.0051292	0.0296004	0.862487	0.98721	633	0.00335097	0.0299912	0.911073	0.993928	633	0.0031701	0.0300139	0.915918	0.989693
SMa C41:5	558	0.0293598	0.0346414	0.39707	0.773819	526	0.0282682	0.0361809	0.43499	0.815129	519	0.029243	0.0362948	0.420797	0.814892	519	0.0295339	0.0363516	0.416923	0.815429
SMa C43:0	350	0.0185297	0.0351042	0.597949	0.857833	331	0.0105267	0.0367037	0.774453	0.98721	326	0.00873412	0.0374478	0.815735	0.993928	326	0.000338248	0.0372425	0.992759	0.996087
